# Supplementary material
Source: PubMed Central journal article supplement (PMC3754725)
Supplement: AEM.00924-13_zam999104612so1.pdf [file AEM.00924-13_zam999104612so1.pdf]

**Aquacultured rainbow trout (*Oncorhynchus mykiss*) possess a large core intestinal microbiota that is resistant to variation in diet and rearing density**

**Running title:** Core microbiota in the rainbow trout intestine

Sandi Wong<sup>a,b,c,†</sup>, Thomas Waldrop<sup>d,†</sup>, Steven Summerfelt<sup>d</sup>, John Davidson<sup>d</sup>, Frederic Barrows<sup>e</sup>, P. Brett Kenney<sup>f</sup>, Timothy Welch<sup>g</sup>, Gregory D. Wiens<sup>g</sup>, Kevin Snekvik<sup>h</sup>, John F. Rawls<sup>a,b,c,#</sup>, and Christopher Good<sup>d,#</sup>

<sup>a</sup>Department of Molecular Genetics and Microbiology, Duke University, Durham, NC 27710, <sup>b</sup>Department of Cell Biology and Physiology, <sup>c</sup>Department of Microbiology and Immunology, University of North Carolina at Chapel Hill, Chapel Hill, NC 27599; <sup>d</sup>The Conservation Fund's Freshwater Institute, 1098 Turner Road, Shepherdstown, WV 25443; <sup>e</sup>Fish Technology Center, 4050 Bridger Canyon Road, Bozeman, MT 59715; <sup>f</sup>Division of Animal and Nutritional Sciences, West Virginia University, Morgantown, WV 26506-6108; <sup>g</sup>USDA-ARS National Center for Cool and Cold Water Aquaculture, 11876 Leetown Road, Leetown, WV 25430; <sup>h</sup>Washington Animal Disease Diagnostic Laboratory and the Department of Veterinary Microbiology and Pathology, College of Veterinary Medicine, Washington State University, Pullman, WA 99164-7034

<sup>†</sup> These authors contributed equally.

## **CONTENTS SUMMARY:**

A summary of the samples used for pyrosequencing (Table S1); a summary of the alpha diversity of the samples (Table S2); a list of the bacterial genera observed in each rainbow trout intestine (Table S3); a list of OTUs observed in each rainbow trout intestine (Table S4); a list of OTUs in the shared core microbiota from each rainbow trout intestine (Table S5); lists of OTUs in each treatment core microbiota from each rainbow trout intestine (Tables S6-S9); lists of OTUs in treatment accessory cores from each rainbow trout intestine (Tables S10-13); LEfSe results for each pair-wise comparison performed (Tables S14-S19); average intestinal inflammation scores in each treatment group (Table S20); end-of-study results for measured fish fillet contaminant concentrations in each diet treatment group (Table S21); proportion of treatment core OTUs each bacterial class contributes (Figure S1); alpha rarefaction for each sample (Figure S2); average relative abundances of each shared core OTUs in each treatment (Figure S3).

**Table S1. Description of 16S rRNA gene pyrosequencing datasets generated in this study**

| Sample Name | Diet           | Density | Tank # | Pyrosequencing Barcode | # Sequences <sup>1</sup> |
|-------------|----------------|---------|--------|------------------------|--------------------------|
| 1B1         | fishmeal-based | high    | 1      | AACGATCC               | 8 650                    |
| 2B1         | fishmeal-based | high    | 1      | ATGCGGTT               | 7 983                    |
| 3B1         | fishmeal-based | high    | 1      | CTCACTGT               | 3 224                    |
| 1B4         | fishmeal-based | high    | 4      | ACAGACTC               | 3 190                    |
| 2B4         | fishmeal-based | high    | 4      | CAGTAGTC               | 3 307                    |
| 3B4         | fishmeal-based | high    | 4      | GACAACTC               | 10 362                   |
| 1B3         | fishmeal-based | low     | 3      | AAGGCCTT               | 2 561                    |
| 2B3         | fishmeal-based | low     | 3      | CACACAGT               | 5 920                    |
| 3B3         | fishmeal-based | low     | 3      | GAAGTGG                | 8 889                    |
| 1B5         | fishmeal-based | low     | 5      | ACCTACCT               | 2 917                    |
| 2B5         | fishmeal-based | low     | 5      | CCAATTCC               | 5 902                    |
| 3B5         | fishmeal-based | low     | 5      | GAGAGACT               | 9 386                    |
| 1B10        | fishmeal-based | low     | 10     | AGGAACCA               | 3 827                    |
| 2B10        | fishmeal-based | low     | 10     | CGCCAATA               | 9 515                    |
| 3B10        | fishmeal-based | low     | 10     | GGAATTGG               | 2 813                    |
| 1B2         | grain-based    | high    | 2      | AATCCGG                | 4 351                    |
| 2B2         | grain-based    | high    | 2      | CAACTGCA               | 3 515                    |
| 3B2         | grain-based    | high    | 2      | CTGTGACA               | 9 047                    |
| 1B6         | grain-based    | high    | 6      | ACGAAGCA               | 4 854                    |
| 2B6         | grain-based    | high    | 6      | CCGGAATT               | 5 652                    |
| 3B6         | grain-based    | high    | 6      | GCAATACC               | 8 532                    |
| 1B9         | grain-based    | high    | 9      | AGCTGATC               | 6 179                    |
| 2B9         | grain-based    | high    | 9      | CGATAAGG               | 3 779                    |
| 3B9         | grain-based    | high    | 9      | GCTAGGAA               | 6 658                    |
| 1B7         | grain-based    | low     | 7      | AGACCTGT               | 3 112                    |
| 2B7         | grain-based    | low     | 7      | CCTTCAA                | 4 626                    |
| 3B7         | grain-based    | low     | 7      | GCGCAATT               | 5 421                    |
| 1B11        | grain-based    | low     | 11     | ATATCCGG               | 2 661                    |
| 2B11        | grain-based    | low     | 11     | CGTAGGTT               | 7 214                    |
| 3B11        | grain-based    | low     | 11     | GGCGAATA               | 1 345                    |
| 1B12        | grain-based    | low     | 12     | ATCCGCAA               | 6 563                    |
| 2B12        | grain-based    | low     | 12     | CTACCTTG               | 10 797                   |
| 3B12        | grain-based    | low     | 12     | GGTACGAA               | 2 464                    |

## Footnotes:

1. Number of sequences remaining for analysis after filtering for low-quality sequence reads, denoising of sequences, chimera slaying, and removal of Cyanobacteria sequences

**Table S2. Alpha diversity estimates of 16S rRNA gene sequence datasets**

| Experimental Group           | Sample Name | Observed Species <sup>1</sup> |                      | Chao1 <sup>1</sup> |                      | Shannon Index <sup>1</sup> |                      | Phylogenetic Distance <sup>1</sup> |                      |
|------------------------------|-------------|-------------------------------|----------------------|--------------------|----------------------|----------------------------|----------------------|------------------------------------|----------------------|
|                              |             | Individual                    | Average <sup>2</sup> | Individual         | Average <sup>2</sup> | Individual                 | Average <sup>2</sup> | Individual                         | Average <sup>2</sup> |
| Fishmeal-based, high density | 1B1         | 158.10                        | 158.97+/-14.77       | 315.22             | 334.65+/-37.68       | 4.79                       | 4.86+/-0.22          | 17.57                              | 17.95+/-1.41         |
|                              | 2B1         | 129.00                        |                      | 285.65             |                      | 4.43                       |                      | 15.16                              |                      |
|                              | 3B1         | 177.00                        |                      | 404.31             |                      | 5.15                       |                      | 19.52                              |                      |
|                              | 1B4         | 166.80                        |                      | 356.70             |                      | 4.91                       |                      | 19.02                              |                      |
|                              | 2B4         | 159.10                        |                      | 314.94             |                      | 4.87                       |                      | 18.56                              |                      |
|                              | 3B4         | 163.80                        |                      | 331.10             |                      | 5.01                       |                      | 17.85                              |                      |
| Fishmeal-based, low density  | 1B3         | 177.90                        | 167.19+/-16.85       | 376.17             | 353.17+/-50.70       | 5.12                       | 4.98+/-0.33          | 20.39                              | 19.00+/-1.16         |
|                              | 2B3         | 170.90                        |                      | 381.38             |                      | 4.92                       |                      | 19.07                              |                      |
|                              | 3B3         | 176.00                        |                      | 385.07             |                      | 5.06                       |                      | 19.53                              |                      |
|                              | 1B5         | 195.50                        |                      | 458.41             |                      | 5.57                       |                      | 20.33                              |                      |
|                              | 2B5         | 136.20                        |                      | 307.45             |                      | 4.32                       |                      | 17.37                              |                      |
|                              | 3B5         | 159.60                        |                      | 310.25             |                      | 4.93                       |                      | 18.62                              |                      |
|                              | 1B10        | 176.50                        |                      | 353.23             |                      | 5.24                       |                      | 19.75                              |                      |
|                              | 2B10        | 146.20                        |                      | 283.24             |                      | 4.68                       |                      | 16.81                              |                      |
| 3B10                         | 165.90      | 323.33                        | 5.02                 | 19.11              |                      |                            |                      |                                    |                      |
| Grain-based, high density    | 1B2         | 161.60                        | 160.72+/-18.56       | 343.45             | 339.33+/-63.74       | 5.07                       | 4.97+/-0.29          | 18.19                              | 18.32+/-1.63         |
|                              | 2B2         | 162.70                        |                      | 360.35             |                      | 5.03                       |                      | 19.63                              |                      |
|                              | 3B2         | 138.50                        |                      | 256.86             |                      | 4.72                       |                      | 16.33                              |                      |
|                              | 1B6         | 144.50                        |                      | 288.79             |                      | 4.83                       |                      | 16.85                              |                      |
|                              | 2B6         | 153.50                        |                      | 315.41             |                      | 4.84                       |                      | 17.87                              |                      |
|                              | 3B6         | 152.00                        |                      | 304.24             |                      | 4.87                       |                      | 16.95                              |                      |
|                              | 1B9         | 205.40                        |                      | 496.90             |                      | 5.68                       |                      | 21.94                              |                      |
|                              | 2B9         | 154.40                        |                      | 338.06             |                      | 4.61                       |                      | 17.92                              |                      |
|                              | 3B9         | 173.90                        |                      | 349.90             |                      | 5.11                       |                      | 19.15                              |                      |
| Grain-based, low density     | 1B7         | 153.60                        | 165.56+/-13.89       | 305.52             | 335.38+/-49.61       | 4.85                       | 5.04+/-0.24          | 17.01                              | 17.89+/-1.38         |
|                              | 2B7         | 173.40                        |                      | 341.83             |                      | 5.06                       |                      | 18.60                              |                      |
|                              | 3B7         | 166.20                        |                      | 351.57             |                      | 4.95                       |                      | 18.47                              |                      |
|                              | 1B11        | 159.10                        |                      | 299.93             |                      | 5.03                       |                      | 16.46                              |                      |
|                              | 2B11        | 182.60                        |                      | 377.23             |                      | 5.32                       |                      | 19.30                              |                      |
|                              | 3B11        | 163.00                        |                      | 321.19             |                      | 5.05                       |                      | 17.11                              |                      |
|                              | 1B12        | 187.00                        |                      | 439.20             |                      | 5.49                       |                      | 20.25                              |                      |
|                              | 2B12        | 166.60                        |                      | 329.85             |                      | 5.04                       |                      | 18.21                              |                      |
| 3B12                         | 138.50      | 252.08                        | 4.58                 | 15.64              |                      |                            |                      |                                    |                      |

Footnotes:

1. All alpha diversity values were calculated using 1 092 randomly sampled sequences from each sample. Values for each sample were iteratively generated ten times and averaged.
2. Averages +/- standard deviation for each experimental group.













|                                                                                                            |       |       |       |       |       |       |       |       |       |        |       |       |       |       |       |       |       |       |       |       |       |        |       |       |       |       |       |       |       |       |       |       |       |       |
|------------------------------------------------------------------------------------------------------------|-------|-------|-------|-------|-------|-------|-------|-------|-------|--------|-------|-------|-------|-------|-------|-------|-------|-------|-------|-------|-------|--------|-------|-------|-------|-------|-------|-------|-------|-------|-------|-------|-------|-------|
| Proteobacteria:Gammaproteobacteria:Pseudomonadales:Moraxellaceae:Enhydrobacter                             | 0.91% | 0.56% | 0.53% | 0.88% | 0.51% | 0.75% | 0.62% | 0.49% | 0.57% | 0.17%  | 0.39% | 0.81% | 0.52% | 0.61% | 0.75% | 0.64% | 0.63% | 0.65% | 0.58% | 0.30% | 0.68% | 0.34%  | 0.48% | 0.62% | 0.67% | 0.69% | 0.89% | 0.90% | 0.53% | 0.67% | 0.50% | 0.68% | 0.37% |       |
| Proteobacteria:Gammaproteobacteria:Pseudomonadales:Moraxellaceae:Moraxella                                 | 0.00% | 0.01% | 0.03% | 0.00% | 0.00% | 0.00% | 0.00% | 0.00% | 0.00% | 0.00%  | 0.00% | 0.00% | 0.00% | 0.00% | 0.00% | 0.00% | 0.00% | 0.00% | 0.00% | 0.00% | 0.00% | 0.00%  | 0.00% | 0.00% | 0.00% | 0.00% | 0.00% | 0.00% | 0.00% | 0.00% | 0.00% | 0.00% | 0.00% |       |
| Proteobacteria:Gammaproteobacteria:Pseudomonadales:Moraxellaceae:Peftucidibaca                             | 0.00% | 0.00% | 0.00% | 0.00% | 0.00% | 0.00% | 0.00% | 0.00% | 0.00% | 0.00%  | 0.00% | 0.00% | 0.00% | 0.00% | 0.00% | 0.00% | 0.00% | 0.00% | 0.00% | 0.00% | 0.00% | 0.00%  | 0.00% | 0.00% | 0.00% | 0.00% | 0.00% | 0.00% | 0.00% | 0.00% | 0.00% | 0.00% | 0.00% |       |
| Proteobacteria:Gammaproteobacteria:Pseudomonadales:Moraxellaceae:Psychrobacter                             | 0.00% | 0.00% | 0.00% | 0.00% | 0.00% | 0.01% | 0.08% | 0.00% | 0.00% | 0.00%  | 0.00% | 0.00% | 0.00% | 0.00% | 0.00% | 0.00% | 0.00% | 0.00% | 0.00% | 0.00% | 0.00% | 0.00%  | 0.00% | 0.00% | 0.00% | 0.00% | 0.00% | 0.00% | 0.00% | 0.00% | 0.00% | 0.00% | 0.00% |       |
| Proteobacteria:Gammaproteobacteria:Pseudomonadales:Moraxellaceae:unclassified genus                        | 0.29% | 0.51% | 0.99% | 1.00% | 0.67% | 0.40% | 0.55% | 0.84% | 0.71% | 0.27%  | 0.44% | 0.77% | 0.73% | 0.61% | 0.28% | 0.62% | 0.80% | 0.43% | 0.74% | 0.51% | 0.53% | 0.44%  | 0.58% | 0.75% | 0.90% | 0.76% | 0.52% | 0.56% | 0.50% | 0.37% | 0.49% | 0.57% | 0.41% |       |
| Proteobacteria:Gammaproteobacteria:Pseudomonadales:Pseudomonadaceae:Azorhizophilus                         | 0.00% | 0.00% | 0.00% | 0.00% | 0.00% | 0.00% | 0.00% | 0.00% | 0.00% | 0.00%  | 0.00% | 0.00% | 0.00% | 0.00% | 0.00% | 0.00% | 0.00% | 0.00% | 0.00% | 0.00% | 0.00% | 0.00%  | 0.00% | 0.00% | 0.00% | 0.00% | 0.00% | 0.00% | 0.00% | 0.00% | 0.00% | 0.00% | 0.00% |       |
| Proteobacteria:Gammaproteobacteria:Pseudomonadales:Pseudomonadaceae:Cellvibrio                             | 0.00% | 0.00% | 0.00% | 0.00% | 0.00% | 0.00% | 0.00% | 0.00% | 0.01% | 0.03%  | 0.00% | 0.00% | 0.01% | 0.00% | 0.00% | 0.00% | 0.00% | 0.00% | 0.00% | 0.00% | 0.00% | 0.00%  | 0.00% | 0.00% | 0.00% | 0.00% | 0.00% | 0.00% | 0.00% | 0.00% | 0.00% | 0.00% | 0.00% |       |
| Proteobacteria:Gammaproteobacteria:Pseudomonadales:Pseudomonadaceae:Pseudomonas                            | 0.43% | 0.70% | 0.37% | 0.38% | 0.82% | 0.34% | 0.74% | 0.52% | 0.49% | 19.95% | 0.24% | 0.35% | 8.57% | 0.55% | 1.28% | 0.51% | 0.17% | 0.18% | 0.45% | 0.62% | 0.29% | 13.85% | 0.77% | 0.42% | 0.13% | 0.45% | 0.65% | 1.09% | 1.73% | 0.22% | 1.01% | 0.61% | 0.32% |       |
| Proteobacteria:Gammaproteobacteria:Pseudomonadales:Pseudomonadaceae:unclassified genus                     | 0.05% | 0.01% | 0.03% | 0.00% | 0.03% | 0.04% | 0.04% | 0.03% | 0.07% | 1.92%  | 0.08% | 0.01% | 0.84% | 0.04% | 0.04% | 0.07% | 0.14% | 0.02% | 0.06% | 0.04% | 0.02% | 1.18%  | 0.08% | 0.06% | 0.00% | 0.00% | 0.07% | 0.08% | 0.17% | 0.00% | 0.17% | 0.07% | 0.04% |       |
| Proteobacteria:Gammaproteobacteria:Pseudomonadales:unclassified family:unclassified genus                  | 0.00% | 0.00% | 0.03% | 0.00% | 0.00% | 0.00% | 0.00% | 0.00% | 0.00% | 0.00%  | 0.00% | 0.01% | 0.00% | 0.00% | 0.00% | 0.00% | 0.00% | 0.00% | 0.00% | 0.00% | 0.00% | 0.00%  | 0.00% | 0.00% | 0.00% | 0.00% | 0.00% | 0.00% | 0.00% | 0.00% | 0.00% | 0.00% | 0.00% |       |
| Proteobacteria:Gammaproteobacteria:Sainisphaerales:Sainisphaeraceae:Sainisphaera                           | 0.00% | 0.00% | 0.00% | 0.00% | 0.00% | 0.00% | 0.00% | 0.00% | 0.00% | 0.00%  | 0.00% | 0.00% | 0.00% | 0.00% | 0.00% | 0.00% | 0.00% | 0.00% | 0.00% | 0.00% | 0.00% | 0.00%  | 0.00% | 0.00% | 0.00% | 0.00% | 0.00% | 0.00% | 0.00% | 0.00% | 0.00% | 0.00% | 0.00% |       |
| Proteobacteria:Gammaproteobacteria:unclassified order:unclassified family:unclassified genus               | 0.00% | 0.00% | 0.03% | 0.03% | 0.09% | 0.04% | 0.08% | 0.07% | 0.02% | 0.34%  | 0.05% | 0.06% | 0.10% | 0.04% | 0.04% | 0.00% | 0.03% | 0.07% | 0.00% | 0.04% | 0.05% | 0.16%  | 0.05% | 0.05% | 0.00% | 0.04% | 0.02% | 0.04% | 0.04% | 0.07% | 0.11% | 0.06% | 0.00% |       |
| Proteobacteria:Gammaproteobacteria:Vibrionales:Vibrionaceae:Photobacterium                                 | 0.01% | 0.00% | 0.00% | 0.00% | 0.06% | 0.02% | 0.00% | 0.00% | 0.00% | 0.00%  | 0.00% | 0.00% | 0.00% | 0.00% | 0.00% | 0.00% | 0.00% | 0.00% | 0.00% | 0.00% | 0.00% | 0.00%  | 0.00% | 0.00% | 0.00% | 0.00% | 0.00% | 0.00% | 0.00% | 0.00% | 0.00% | 0.00% | 0.00% |       |
| Proteobacteria:Gammaproteobacteria:Vibrionales:Vibrionaceae:unclassified genus                             | 0.00% | 0.00% | 0.00% | 0.00% | 0.00% | 0.00% | 0.00% | 0.00% | 0.00% | 0.00%  | 0.00% | 0.00% | 0.00% | 0.00% | 0.00% | 0.00% | 0.00% | 0.00% | 0.00% | 0.00% | 0.00% | 0.00%  | 0.00% | 0.00% | 0.00% | 0.00% | 0.00% | 0.00% | 0.00% | 0.00% | 0.00% | 0.00% | 0.00% |       |
| Proteobacteria:Gammaproteobacteria:Vibrionales:Vibrionaceae:Vibrio                                         | 0.00% | 0.00% | 0.00% | 0.03% | 0.00% | 0.03% | 0.00% | 0.00% | 0.01% | 0.00%  | 0.00% | 0.00% | 0.00% | 0.00% | 0.00% | 0.03% | 0.03% | 0.04% | 0.00% | 0.00% | 0.00% | 0.02%  | 0.00% | 0.00% | 0.00% | 0.05% | 0.03% | 0.02% | 0.06% | 0.00% | 0.00% | 0.02% | 0.01% | 0.00% |
| Proteobacteria:Gammaproteobacteria:Xanthomonadales:Sinobacteraceae:Steriodobacter                          | 0.00% | 0.00% | 0.00% | 0.09% | 0.00% | 0.00% | 0.00% | 0.00% | 0.00% | 0.00%  | 0.00% | 0.00% | 0.00% | 0.00% | 0.00% | 0.00% | 0.00% | 0.00% | 0.00% | 0.00% | 0.00% | 0.00%  | 0.00% | 0.00% | 0.00% | 0.00% | 0.00% | 0.00% | 0.00% | 0.00% | 0.00% | 0.00% | 0.00% |       |
| Proteobacteria:Gammaproteobacteria:Xanthomonadales:Xanthomonadaceae:Lysobacter                             | 0.00% | 0.00% | 0.00% | 0.00% | 0.00% | 0.00% | 0.00% | 0.00% | 0.00% | 0.00%  | 0.00% | 0.00% | 0.00% | 0.00% | 0.00% | 0.00% | 0.00% | 0.00% | 0.00% | 0.00% | 0.00% | 0.00%  | 0.00% | 0.00% | 0.00% | 0.00% | 0.00% | 0.00% | 0.00% | 0.00% | 0.00% | 0.00% | 0.00% |       |
| Proteobacteria:Gammaproteobacteria:Xanthomonadales:Xanthomonadaceae:Pseudoxanthomonas                      | 0.00% | 0.01% | 0.00% | 0.00% | 0.00% | 0.00% | 0.00% | 0.00% | 0.00% | 0.00%  | 0.00% | 0.00% | 0.00% | 0.00% | 0.00% | 0.00% | 0.00% | 0.00% | 0.00% | 0.00% | 0.00% | 0.00%  | 0.00% | 0.00% | 0.00% | 0.00% | 0.00% | 0.00% | 0.00% | 0.00% | 0.00% | 0.00% | 0.00% |       |
| Proteobacteria:Gammaproteobacteria:Xanthomonadales:Xanthomonadaceae:Stenotrophomonas                       | 0.06% | 0.11% | 0.03% | 0.03% | 0.06% | 0.15% | 0.08% | 0.02% | 0.03% | 0.51%  | 0.05% | 0.00% | 0.21% | 0.02% | 0.00% | 0.06% | 0.06% | 0.02% | 0.06% | 0.11% | 0.01% | 0.24%  | 0.03% | 0.06% | 0.00% | 0.04% | 0.02% | 0.04% | 0.17% | 0.00% | 0.20% | 0.07% | 0.00% |       |
| Proteobacteria:Gammaproteobacteria:Xanthomonadales:Xanthomonadaceae:unclassified genus                     | 0.00% | 0.00% | 0.00% | 0.00% | 0.00% | 0.00% | 0.00% | 0.00% | 0.00% | 0.00%  | 0.00% | 0.00% | 0.00% | 0.00% | 0.00% | 0.00% | 0.00% | 0.00% | 0.00% | 0.00% | 0.00% | 0.00%  | 0.00% | 0.00% | 0.00% | 0.00% | 0.00% | 0.00% | 0.00% | 0.00% | 0.00% | 0.00% | 0.00% |       |
| Proteobacteria:Gammaproteobacteria:Xanthomonadales:Xanthomonadaceae:Xanthomonas                            | 0.02% | 0.04% | 0.06% | 0.00% | 0.03% | 0.02% | 0.00% | 0.00% | 0.03% | 0.00%  | 0.00% | 0.01% | 0.00% | 0.06% | 0.00% | 0.00% | 0.03% | 0.01% | 0.00% | 0.00% | 0.00% | 0.00%  | 0.00% | 0.00% | 0.00% | 0.00% | 0.00% | 0.00% | 0.00% | 0.00% | 0.00% | 0.00% | 0.00% |       |
| Proteobacteria:unclassified class:unclassified order:unclassified family:unclassified genus                | 0.02% | 0.05% | 0.03% | 0.09% | 0.15% | 0.00% | 0.16% | 0.05% | 0.04% | 0.10%  | 0.00% | 0.04% | 0.10% | 0.00% | 0.07% | 0.00% | 0.03% | 0.02% | 0.02% | 0.05% | 0.02% | 0.15%  | 0.13% | 0.00% | 0.00% | 0.06% | 0.00% | 0.11% | 0.15% | 0.00% | 0.49% | 0.13% | 0.04% |       |
| Spirochaetes:Spirochaetales:Spirochaetales:Treponema                                                       | 0.00% | 0.00% | 0.00% | 0.00% | 0.00% | 0.00% | 0.00% | 0.00% | 0.04% | 0.00%  | 0.00% | 0.00% | 0.00% | 0.00% | 0.00% | 0.00% | 0.00% | 0.00% | 0.00% | 0.01% | 0.00% | 0.04%  | 0.00% | 0.00% | 0.00% | 0.00% | 0.00% | 0.00% | 0.00% | 0.00% | 0.00% | 0.00% | 0.00% |       |
| SR1:SR1_genera_incertae_sedis:unclassified order:unclassified family:unclassified genus                    | 0.00% | 0.00% | 0.00% | 0.00% | 0.00% | 0.00% | 0.00% | 0.00% | 0.01% | 0.00%  | 0.00% | 0.00% | 0.00% | 0.00% | 0.00% | 0.00% | 0.00% | 0.00% | 0.00% | 0.00% | 0.00% | 0.00%  | 0.00% | 0.00% | 0.00% | 0.00% | 0.00% | 0.00% | 0.00% | 0.00% | 0.00% | 0.00% | 0.00% |       |
| Synergistetes:Synergistia:Synergistiales:Synergistaceae:unclassified genus                                 | 0.02% | 0.00% | 0.00% | 0.00% | 0.00% | 0.00% | 0.00% | 0.00% | 0.00% | 0.00%  | 0.00% | 0.00% | 0.00% | 0.00% | 0.00% | 0.00% | 0.00% | 0.00% | 0.00% | 0.00% | 0.00% | 0.00%  | 0.00% | 0.00% | 0.00% | 0.00% | 0.00% | 0.00% | 0.00% | 0.00% | 0.00% | 0.00% | 0.00% |       |
| Tenericutes:Mollicutes:Anaeroplasmatales:Anaeroplasmataceae:Anaeroplasma                                   | 0.00% | 0.00% | 0.00% | 0.00% | 0.00% | 0.00% | 0.00% | 0.00% | 0.00% | 0.00%  | 0.00% | 0.00% | 0.00% | 0.00% | 0.00% | 0.00% | 0.00% | 0.00% | 0.00% | 0.00% | 0.00% | 0.00%  | 0.00% | 0.00% | 0.00% | 0.00% | 0.00% | 0.00% | 0.00% | 0.00% | 0.00% | 0.00% | 0.00% |       |
| Tenericutes:Mollicutes:Mycoplasmatales:Mycoplasmataceae:Mycoplasma                                         | 0.00% | 0.00% | 0.00% | 0.00% | 0.00% | 0.00% | 0.00% | 0.00% | 0.00% | 0.00%  | 0.00% | 0.00% | 0.00% | 0.00% | 0.00% | 0.00% | 0.00% | 0.00% | 0.00% | 0.00% | 0.00% | 0.00%  | 0.00% | 0.00% | 0.00% | 0.00% | 0.00% | 0.00% | 0.00% | 0.00% | 0.00% | 0.00% | 0.00% |       |
| TM7:TM7_genera_incertae_sedis:unclassified order:unclassified family:unclassified genus                    | 0.02% | 0.00% | 0.06% | 0.09% | 0.09% | 0.04% | 0.08% | 0.07% | 0.03% | 0.03%  | 0.10% | 0.04% | 0.03% | 0.02% | 0.21% | 0.02% | 0.14% | 0.04% | 0.02% | 0.12% | 0.00% | 0.03%  | 0.37% | 0.05% | 0.03% | 0.02% | 0.09% | 0.04% | 0.03% | 0.22% | 0.08% | 0.07% | 0.04% |       |
| Verrucomicrobia:Opitutae:Opitutales:Opitutaceae:Opitutus                                                   | 0.00% | 0.00% | 0.00% | 0.00% | 0.00% | 0.00% | 0.00% | 0.00% | 0.00% | 0.00%  | 0.00% | 0.00% | 0.00% | 0.00% | 0.00% | 0.00% | 0.00% | 0.00% | 0.00% | 0.00% | 0.00% | 0.00%  | 0.00% | 0.00% | 0.00% | 0.00% | 0.00% | 0.00% | 0.00% | 0.00% | 0.00% | 0.00% | 0.04% |       |
| Verrucomicrobia:Spartobacteria:Spartobacteria_genera_incertae_sedis:unclassified family:unclassified genus | 0.00% | 0.00% | 0.00% | 0.00% | 0.00% | 0.00% | 0.00% | 0.00% | 0.00% | 0.00%  | 0.00% | 0.00% | 0.00% | 0.00% | 0.00% | 0.00% | 0.00% | 0.00% | 0.00% | 0.00% | 0.00% | 0.00%  | 0.00% | 0.00% | 0.00% | 0.00% | 0.00% | 0.00% | 0.00% | 0.00% | 0.00% | 0.00% | 0.00% |       |
| Verrucomicrobia:unclassified class:unclassified order:unclassified family:unclassified genus               | 0.00% | 0.00% | 0.00% | 0.00% | 0.00% | 0.00% | 0.00% | 0.00% | 0.00% | 0.00%  | 0.00% | 0.00% | 0.00% | 0.00% | 0.00% | 0.00% | 0.00% | 0.00% | 0.00% | 0.00% | 0.00% | 0.00%  | 0.00% | 0.00% | 0.00% | 0.00% | 0.00% | 0.00% | 0.00% | 0.00% | 0.00% | 0.00% | 0.00% |       |
| Verrucomicrobia:Verrucomicrobiales:Verrucomicrobiales:Akkermansia                                          | 0.00% | 0.00% | 0.00% | 0.00% | 0.00% | 0.00% | 0.00% | 0.00% | 0.00% | 0.00%  | 0.00% | 0.00% | 0.00% | 0.00% | 0.00% | 0.00% | 0.00% | 0.00% | 0.00% | 0.00% | 0.00% | 0.00%  | 0.00% | 0.00% | 0.00% | 0.00% | 0.00% | 0.00% | 0.00% | 0.00% | 0.00% | 0.00% | 0.00% |       |
| unclassified phylum:unclassified class:unclassified order:unclassified family:unclassified genus           | 0.57% | 0.65% | 1.80% | 1.41% | 1.03% | 0.49% | 1.25% | 0.88% | 0.79% | 5.90%  | 0.66% | 0.86% | 2.72% | 0.56% | 0.92% | 1.08% | 1.54% | 1.47% | 1.36% | 0.92% | 2.20% | 9.24%  | 0.61% | 0.83% | 0.48% | 0.80% | 1.31% | 0.71% | 0.72% | 0.45% | 1.87% | 0.66% | 0.32% |       |

Footnotes:

- 1. Values represent the relative abundance, by percent, of each listed genus observed within each sample.
- 2. Taxonomic assignment determined using RDP classifier to compare a representative sequence from each OTU to reference sequences in the greengenes database.



















































|      |                                                                                       |      |      |     |     |     |      |     |      |     |     |     |      |     |     |      |     |     |      |     |      |      |     |      |      |     |      |     |     |      |     |     |     |     |    |   |   |
|------|---------------------------------------------------------------------------------------|------|------|-----|-----|-----|------|-----|------|-----|-----|-----|------|-----|-----|------|-----|-----|------|-----|------|------|-----|------|------|-----|------|-----|-----|------|-----|-----|-----|-----|----|---|---|
| 2751 | Proteobacteria:Alphaproteobacteria:Sphingomonadales:Sphingomonadaceae                 | 1    | 5    | 2   | 2   | 0   | 6    | 4   | 1    | 1   | 3   | 4   | 4    | 2   | 3   | 6    | 1   | 0   | 1    | 5   | 6    | 1    | 6   | 6    | 6    | 2   | 7    | 0   | 5   | 6    | 1   | 3   | 0   | 1   |    |   |   |
| 3352 | Proteobacteria:Alphaproteobacteria:Sphingomonadales:Sphingomonadaceae                 | 0    | 0    | 0   | 0   | 0   | 0    | 0   | 0    | 0   | 0   | 0   | 0    | 0   | 0   | 0    | 1   | 0   | 1    | 0   | 1    | 0    | 0   | 0    | 0    | 1   | 0    | 0   | 0   | 2    | 0   | 0   | 0   |     |    |   |   |
| 4083 | Proteobacteria:Alphaproteobacteria:Sphingomonadales:Sphingomonadaceae                 | 0    | 0    | 0   | 0   | 0   | 0    | 2   | 0    | 0   | 0   | 0   | 0    | 0   | 0   | 1    | 0   | 0   | 0    | 0   | 0    | 0    | 0   | 0    | 0    | 0   | 0    | 0   | 0   | 0    | 0   | 0   | 0   |     |    |   |   |
| 4368 | Proteobacteria:Alphaproteobacteria:Sphingomonadales:Sphingomonadaceae                 | 0    | 0    | 0   | 0   | 0   | 0    | 0   | 0    | 0   | 0   | 0   | 0    | 0   | 0   | 1    | 0   | 0   | 0    | 0   | 0    | 0    | 0   | 0    | 0    | 0   | 0    | 0   | 0   | 0    | 0   | 0   | 0   |     |    |   |   |
| 4375 | Proteobacteria:Alphaproteobacteria:Sphingomonadales:Sphingomonadaceae                 | 0    | 0    | 0   | 0   | 0   | 0    | 0   | 0    | 0   | 0   | 0   | 0    | 0   | 0   | 0    | 0   | 0   | 0    | 0   | 0    | 0    | 0   | 0    | 0    | 0   | 0    | 0   | 0   | 0    | 0   | 0   | 0   |     |    |   |   |
| 4603 | Proteobacteria:Alphaproteobacteria:Sphingomonadales:Sphingomonadaceae                 | 0    | 1    | 0   | 0   | 0   | 0    | 0   | 0    | 1   | 1   | 2   | 0    | 0   | 0   | 0    | 0   | 0   | 0    | 1   | 0    | 1    | 0   | 0    | 0    | 0   | 1    | 0   | 0   | 2    | 0   | 1   | 1   | 0   |    |   |   |
| 4680 | Proteobacteria:Alphaproteobacteria:Sphingomonadales:Sphingomonadaceae                 | 0    | 2    | 1   | 1   | 1   | 0    | 0   | 0    | 2   | 2   | 0   | 0    | 0   | 0   | 3    | 2   | 0   | 0    | 1   | 0    | 0    | 1   | 1    | 1    | 1   | 1    | 1   | 0   | 4    | 1   | 0   | 1   | 3   | 0  |   |   |
| 4848 | Proteobacteria:Alphaproteobacteria:Sphingomonadales:Sphingomonadaceae                 | 0    | 0    | 0   | 0   | 0   | 0    | 0   | 0    | 0   | 0   | 0   | 0    | 0   | 0   | 0    | 0   | 0   | 0    | 0   | 0    | 0    | 1   | 0    | 0    | 0   | 0    | 0   | 0   | 0    | 0   | 0   | 0   | 0   |    |   |   |
| 5190 | Proteobacteria:Alphaproteobacteria:Sphingomonadales:Sphingomonadaceae                 | 0    | 0    | 0   | 2   | 1   | 2    | 2   | 0    | 1   | 2   | 4   | 0    | 0   | 2   | 0    | 1   | 2   | 3    | 2   | 4    | 1    | 0   | 3    | 1    | 2   | 0    | 0   | 3   | 0    | 1   | 1   | 4   | 0   | 0  |   |   |
| 5193 | Proteobacteria:Alphaproteobacteria:Sphingomonadales:Sphingomonadaceae                 | 0    | 0    | 0   | 0   | 0   | 0    | 0   | 0    | 0   | 0   | 0   | 0    | 0   | 0   | 1    | 1   | 0   | 0    | 0   | 0    | 0    | 0   | 0    | 0    | 0   | 0    | 0   | 0   | 0    | 0   | 0   | 0   | 0   |    |   |   |
| 5447 | Proteobacteria:Alphaproteobacteria:Sphingomonadales:Sphingomonadaceae                 | 0    | 0    | 0   | 0   | 0   | 0    | 0   | 0    | 2   | 0   | 0   | 0    | 0   | 0   | 0    | 0   | 0   | 0    | 0   | 0    | 0    | 0   | 0    | 0    | 0   | 0    | 0   | 0   | 0    | 0   | 0   | 0   | 0   | 0  |   |   |
| 5646 | Proteobacteria:Alphaproteobacteria:Sphingomonadales:Sphingomonadaceae                 | 0    | 0    | 0   | 0   | 0   | 0    | 0   | 1    | 0   | 0   | 0   | 0    | 0   | 0   | 0    | 0   | 0   | 0    | 0   | 0    | 1    | 0   | 0    | 0    | 0   | 0    | 0   | 0   | 0    | 0   | 0   | 0   | 0   | 0  |   |   |
| 2877 | Proteobacteria:Alphaproteobacteria:Sphingomonadales:Sphingomonadaceae:Blastomonas     | 0    | 0    | 0   | 0   | 0   | 0    | 0   | 0    | 0   | 0   | 0   | 0    | 0   | 0   | 0    | 0   | 0   | 0    | 0   | 0    | 2    | 0   | 0    | 0    | 0   | 0    | 0   | 0   | 0    | 0   | 0   | 0   | 0   | 0  |   |   |
| 4586 | Proteobacteria:Alphaproteobacteria:Sphingomonadales:Sphingomonadaceae:Blastomonas     | 0    | 0    | 0   | 0   | 0   | 0    | 0   | 1    | 0   | 0   | 0   | 0    | 3   | 0   | 0    | 0   | 0   | 0    | 0   | 0    | 2    | 0   | 0    | 0    | 0   | 0    | 0   | 0   | 0    | 0   | 0   | 0   | 0   | 0  |   |   |
| 3451 | Proteobacteria:Alphaproteobacteria:Sphingomonadales:Sphingomonadaceae:Novosphingobium | 3    | 2    | 0   | 0   | 1   | 7    | 10  | 8    | 1   | 4   | 3   | 14   | 7   | 4   | 12   | 3   | 4   | 6    | 4   | 2    | 10   | 6   | 4    | 15   | 0   | 25   | 1   | 1   | 13   | 0   | 0   | 2   | 13  | 0  |   |   |
| 1672 | Proteobacteria:Alphaproteobacteria:Sphingomonadales:Sphingomonadaceae:Sphingobium     | 0    | 0    | 0   | 0   | 3   | 0    | 0   | 0    | 1   | 0   | 0   | 0    | 0   | 2   | 8    | 0   | 1   | 2    | 0   | 0    | 0    | 0   | 0    | 0    | 2   | 1    | 7   | 0   | 3    | 0   | 0   | 0   | 0   | 0  |   |   |
| 2721 | Proteobacteria:Alphaproteobacteria:Sphingomonadales:Sphingomonadaceae:Sphingobium     | 0    | 0    | 0   | 0   | 0   | 0    | 0   | 0    | 0   | 0   | 0   | 0    | 0   | 0   | 0    | 0   | 0   | 0    | 0   | 0    | 0    | 0   | 0    | 0    | 0   | 0    | 0   | 0   | 0    | 0   | 0   | 0   | 0   | 0  |   |   |
| 2900 | Proteobacteria:Alphaproteobacteria:Sphingomonadales:Sphingomonadaceae:Sphingobium     | 4    | 0    | 1   | 0   | 0   | 0    | 0   | 0    | 0   | 0   | 1   | 0    | 0   | 0   | 8    | 0   | 0   | 0    | 0   | 0    | 3    | 0   | 0    | 0    | 0   | 0    | 5   | 0   | 0    | 0   | 0   | 1   | 0   | 0  |   |   |
| 1578 | Proteobacteria:Alphaproteobacteria:Sphingomonadales:Sphingomonadaceae:Sphingomonas    | 1    | 0    | 0   | 0   | 0   | 0    | 0   | 2    | 0   | 0   | 0   | 0    | 0   | 0   | 1    | 1   | 1   | 2    | 0   | 1    | 0    | 0   | 3    | 0    | 0   | 0    | 0   | 0   | 0    | 0   | 0   | 0   | 0   | 2  |   |   |
| 2456 | Proteobacteria:Alphaproteobacteria:Sphingomonadales:Sphingomonadaceae:Sphingomonas    | 4    | 4    | 0   | 1   | 0   | 2    | 1   | 2    | 0   | 1   | 5   | 2    | 0   | 3   | 4    | 0   | 0   | 0    | 5   | 2    | 1    | 5   | 0    | 2    | 2   | 1    | 2   | 2   | 1    | 6   | 0   | 1   | 3   | 3  |   |   |
| 1945 | Proteobacteria:Alphaproteobacteria:Sphingomonadales:Sphingomonadaceae:Sphingomonas    | 1882 | 1650 | 131 | 582 | 610 | 1876 | 705 | 1651 | 485 | 429 | 968 | 1612 | 189 | 552 | 1727 | 683 | 418 | 1777 | 882 | 1141 | 1593 | 523 | 1104 | 1113 | 469 | 1489 | 166 | 864 | 1755 | 214 | 484 | 931 | 940 |    |   |   |
| 3461 | Proteobacteria:Alphaproteobacteria:Sphingomonadales:Sphingomonadaceae:Sphingomonas    | 489  | 488  | 1   | 19  | 14  | 72   | 32  | 51   | 16  | 16  | 20  | 62   | 11  | 12  | 59   | 25  | 11  | 50   | 30  | 37   | 47   | 13  | 38   | 43   | 13  | 43   | 7   | 24  | 55   | 8   | 18  | 35  | 43  |    |   |   |
| 1760 | Proteobacteria:Alphaproteobacteria:Sphingomonadales:Sphingomonadaceae:Sphingomonas    | 0    | 0    | 0   | 0   | 0   | 0    | 0   | 0    | 0   | 0   | 0   | 1    | 0   | 0   | 0    | 0   | 0   | 0    | 0   | 0    | 0    | 0   | 0    | 0    | 0   | 0    | 0   | 0   | 0    | 0   | 0   | 0   | 0   | 0  |   |   |
| 4139 | Proteobacteria:Alphaproteobacteria:Sphingomonadales:Sphingomonadaceae:Sphingomonas    | 26   | 34   | 4   | 5   | 7   | 34   | 22  | 25   | 18  | 13  | 27  | 41   | 6   | 9   | 23   | 14  | 5   | 21   | 17  | 40   | 35   | 16  | 18   | 22   | 9   | 44   | 5   | 12  | 33   | 12  | 13  | 19  | 23  |    |   |   |
| 3036 | Proteobacteria:Alphaproteobacteria:Sphingomonadales:Sphingomonadaceae:Sphingomonas    | 4    | 5    | 0   | 1   | 1   | 10   | 3   | 7    | 1   | 3   | 4   | 4    | 0   | 5   | 4    | 0   | 4   | 3    | 6   | 8    | 1    | 3   | 7    | 2    | 4   | 0    | 0   | 6   | 3    | 1   | 3   | 2   | 2   | 0  |   |   |
| 3070 | Proteobacteria:Alphaproteobacteria:Sphingomonadales:Sphingomonadaceae:Sphingomonas    | 1    | 0    | 0   | 0   | 0   | 1    | 0   | 0    | 0   | 0   | 0   | 0    | 0   | 0   | 0    | 0   | 0   | 0    | 0   | 1    | 0    | 0   | 0    | 0    | 0   | 0    | 0   | 0   | 0    | 0   | 0   | 0   | 0   | 0  |   |   |
| 4601 | Proteobacteria:Alphaproteobacteria:Sphingomonadales:Sphingomonadaceae:Sphingomonas    | 0    | 0    | 0   | 0   | 0   | 0    | 0   | 0    | 0   | 0   | 0   | 0    | 0   | 0   | 0    | 0   | 0   | 0    | 0   | 0    | 0    | 0   | 0    | 0    | 0   | 0    | 0   | 0   | 0    | 0   | 0   | 0   | 0   | 10 | 0 |   |
| 4768 | Proteobacteria:Alphaproteobacteria:Sphingomonadales:Sphingomonadaceae:Sphingomonas    | 5    | 1    | 0   | 2   | 1   | 2    | 1   | 1    | 0   | 2   | 1   | 3    | 0   | 3   | 1    | 1   | 1   | 2    | 1   | 2    | 3    | 0   | 1    | 0    | 0   | 2    | 0   | 1   | 3    | 0   | 0   | 2   | 2   | 2  | 0 |   |
| 5335 | Proteobacteria:Alphaproteobacteria:Sphingomonadales:Sphingomonadaceae:Sphingomonas    | 4    | 0    | 0   | 0   | 0   | 2    | 0   | 0    | 0   | 0   | 1   | 0    | 0   | 0   | 0    | 0   | 0   | 0    | 0   | 0    | 0    | 0   | 0    | 0    | 0   | 0    | 0   | 0   | 0    | 0   | 0   | 0   | 0   | 0  | 0 |   |
| 289  | Proteobacteria:Betaproteobacteria                                                     | 0    | 0    | 0   | 0   | 0   | 0    | 0   | 0    | 0   | 0   | 0   | 0    | 0   | 0   | 0    | 1   | 0   | 0    | 0   | 0    | 0    | 0   | 0    | 0    | 0   | 0    | 0   | 0   | 0    | 0   | 0   | 0   | 0   | 0  | 0 |   |
| 408  | Proteobacteria:Betaproteobacteria                                                     | 0    | 0    | 0   | 0   | 0   | 0    | 0   | 0    | 0   | 0   | 0   | 0    | 0   | 0   | 0    | 0   | 0   | 0    | 0   | 0    | 0    | 0   | 0    | 0    | 0   | 0    | 0   | 0   | 0    | 0   | 0   | 0   | 0   | 0  | 0 |   |
| 673  | Proteobacteria:Betaproteobacteria                                                     | 0    | 0    | 0   | 0   | 0   | 0    | 0   | 0    | 0   | 0   | 0   | 0    | 0   | 0   | 0    | 0   | 0   | 0    | 0   | 0    | 0    | 0   | 0    | 0    | 0   | 0    | 0   | 0   | 0    | 0   | 0   | 0   | 0   | 0  | 0 |   |
| 930  | Proteobacteria:Betaproteobacteria                                                     | 0    | 0    | 0   | 0   | 0   | 0    | 0   | 0    | 0   | 0   | 0   | 0    | 0   | 0   | 0    | 1   | 0   | 0    | 0   | 0    | 0    | 0   | 0    | 0    | 0   | 0    | 0   | 0   | 0    | 0   | 0   | 0   | 0   | 0  | 0 |   |
| 948  | Proteobacteria:Betaproteobacteria                                                     | 0    | 0    | 0   | 0   | 0   | 0    | 0   | 0    | 0   | 0   | 0   | 0    | 0   | 0   | 0    | 0   | 0   | 0    | 0   | 0    | 0    | 0   | 0    | 0    | 0   | 0    | 0   | 0   | 0    | 0   | 0   | 0   | 0   | 0  | 0 |   |
| 961  | Proteobacteria:Betaproteobacteria                                                     | 0    | 0    | 0   | 0   | 0   | 0    | 0   | 0    | 0   | 0   | 0   | 0    | 0   | 0   | 0    | 0   | 0   | 0    | 0   | 0    | 0    | 0   | 0    | 0    | 0   | 0    | 0   | 0   | 0    | 0   | 0   | 0   | 0   | 0  | 0 |   |
| 1172 | Proteobacteria:Betaproteobacteria                                                     | 0    | 0    | 0   | 0   | 0   | 0    | 0   | 0    | 0   | 0   | 0   | 0    | 0   | 0   | 0    | 0   | 0   | 0    | 0   | 0    | 0    | 0   | 0    | 0    | 0   | 0    | 0   | 0   | 0    | 0   | 0   | 0   | 0   | 0  | 0 |   |
| 1177 | Proteobacteria:Betaproteobacteria                                                     | 0    | 0    | 0   | 0   | 0   | 0    | 0   | 0    | 0   | 0   | 0   | 0    | 0   | 0   | 0    | 0   | 0   | 0    | 0   | 0    | 0    | 0   | 0    | 0    | 0   | 0    | 0   | 0   | 0    | 0   | 0   | 0   | 0   | 0  | 0 |   |
| 1433 | Proteobacteria:Betaproteobacteria                                                     | 0    | 0    | 0   | 0   | 0   | 0    | 0   | 0    | 0   | 0   | 0   | 3    | 0   | 0   | 0    | 0   | 0   | 0    | 0   | 0    | 0    | 0   | 0    | 0    | 0   | 0    | 0   | 0   | 0    | 0   | 0   | 0   | 0   | 0  | 0 |   |
| 1727 | Proteobacteria:Betaproteobacteria                                                     | 0    | 0    | 0   | 0   | 0   | 0    | 0   | 0    | 0   | 0   | 0   | 0    | 0   | 0   | 0    | 0   | 0   | 0    | 0   | 0    | 0    | 0   | 0    | 0    | 0   | 0    | 0   | 0   | 0    | 0   | 0   | 0   | 0   | 0  | 0 |   |
| 2325 | Proteobacteria:Betaproteobacteria                                                     | 1    | 0    | 0   | 0   | 2   | 2    | 0   | 1    | 0   | 0   | 0   | 0    | 0   | 1   | 0    | 1   | 1   | 1    | 0   | 0    | 0    | 0   | 0    | 0    | 0   | 0    | 0   | 0   | 1    | 1   | 1   | 1   | 1   | 1  | 1 |   |
| 2771 | Proteobacteria:Betaproteobacteria                                                     | 0    | 0    | 0   | 0   | 0   | 0    | 0   | 0    | 0   | 0   | 0   | 0    | 0   | 0   | 0    | 0   | 0   | 0    | 0   | 0    | 0    | 0   | 0    | 0    | 0   | 0    | 0   | 0   | 0    | 0   | 0   | 0   | 0   | 0  | 0 |   |
| 2966 | Proteobacteria:Betaproteobacteria                                                     | 0    | 0    | 0   | 0   | 0   | 0    | 0   | 0    | 0   | 0   | 0   | 0    | 0   | 0   | 0    | 0   | 0   | 0    | 0   | 0    | 0    | 0   | 0    | 0    | 0   | 0    | 0   | 0   | 0    | 0   | 0   | 0   | 0   | 0  | 0 |   |
| 3155 | Proteobacteria:Betaproteobacteria                                                     | 0    | 0    | 0   | 0   | 0   | 0    | 0   | 0    | 0   | 0   | 0   | 0    | 0   | 0   | 0    | 0   | 0   | 0    | 0   | 0    | 0    | 0   | 0    | 0    | 0   | 0    | 0   | 5   | 0    | 0   | 0   | 0   | 0   | 0  | 0 |   |
| 3328 | Proteobacteria:Betaproteobacteria                                                     | 0    | 0    | 0   | 0   | 0   | 0    | 0   | 0    | 0   | 0   | 0   | 0    | 0   | 0   | 0    | 0   | 0   | 0    | 0   | 2    | 0    | 0   | 0    | 0    | 0   | 0    | 0   | 0   | 0    | 0   | 0   | 0   | 0   | 0  | 0 |   |
| 3397 | Proteobacteria:Betaproteobacteria                                                     | 0    | 0    | 0   | 0   | 0   | 0    | 0   | 0    | 0   | 0   | 0   | 0    | 0   | 0   | 0    | 0   | 0   | 0    | 0   | 0    | 1    | 0   | 0    | 0    | 0   | 0    | 0   | 0   | 0    | 0   | 0   | 0   | 0   | 0  | 0 |   |
| 3506 | Proteobacteria:Betaproteobacteria                                                     | 0    | 0    | 0   | 0   | 0   | 0    | 0   | 0    | 0   | 0   | 0   | 0    | 0   | 0   | 0    | 0   | 0   | 0    | 0   | 0    | 0    | 0   | 0    | 0    | 0   | 0    | 0   | 0   | 0    | 0   | 0   | 0   | 0   | 0  | 0 |   |
| 3541 | Proteobacteria:Betaproteobacteria                                                     | 0    | 0    | 1   | 0   | 0   | 0    | 0   | 0    | 0   | 0   | 0   | 0    | 0   | 0   | 0    | 0   | 0   | 0    | 0   | 0    | 0    | 0   | 0    | 0    | 0   | 0    | 0   | 0   | 0    | 0   | 0   | 0   | 0   | 0  | 0 |   |
| 3581 | Proteobacteria:Betaproteobacteria                                                     | 0    | 0    | 0   | 0   | 0   | 0    | 0   | 0    | 0   | 0   | 0   | 0    | 0   | 0   | 0    | 0   | 0   | 0    | 0   | 0    | 0    | 0   | 0    | 0    | 0   | 0    | 0   | 0   | 0    | 0   | 0   | 0   | 0   | 0  | 0 |   |
| 3845 | Proteobacteria:Betaproteobacteria                                                     | 0    | 0    | 0   | 0   | 0   | 0    | 0   | 0    | 0   | 0   | 0   | 0    | 0   | 0   | 0    | 0   | 0   | 0    | 0   | 0    | 0    | 0   | 0    | 0    | 0   | 0    | 0   | 0   | 0    | 0   | 0   | 0   | 0   | 0  | 0 | 0 |
| 3993 | Proteobacteria:Betaproteobacteria                                                     | 0    | 0    | 0   | 0   | 0   | 0    | 0   | 0    | 0   | 0   | 0   | 0    | 0   | 0   | 0    | 1   | 0   | 0    | 0   | 0    | 0    | 0   | 0    | 0    | 0   | 0    | 0   | 0   | 0    | 0   | 0   | 0   | 0   | 0  | 0 |   |
| 4185 | Proteobacteria:Betaproteobacteria                                                     | 0    | 0    | 0   | 0   | 0   |      |     |      |     |     |     |      |     |     |      |     |     |      |     |      |      |     |      |      |     |      |     |     |      |     |     |     |     |    |   |   |



























Table S5. Shared core microbiota of the rainbow trout Intestine<sup>1</sup>

| #OTU ID <sup>2</sup> | Consensus Lineage <sup>3</sup>                                                                      | Fishmeal-based, high density |      |     |     |     |      | Fishmeal-based, low density |       |     |      |      |      | Grain-based, high density |     |      |      |      |      | Grain-based, low density |      |      |     |      |      |       |       |     |       |      |     |     |     |      |  |
|----------------------|-----------------------------------------------------------------------------------------------------|------------------------------|------|-----|-----|-----|------|-----------------------------|-------|-----|------|------|------|---------------------------|-----|------|------|------|------|--------------------------|------|------|-----|------|------|-------|-------|-----|-------|------|-----|-----|-----|------|--|
|                      |                                                                                                     | B1                           | B1   | 3B1 | B4  | B4  | 3B4  | B10                         | B2B10 | B13 | B2B3 | 3B3  | B5   | B5                        | 3B5 | B2   | B2B2 | B2B2 | B6   | B6                       | 3B6  | B9   | B9  | 3B9  | B11  | B2B11 | B3B11 | B12 | B2B12 | 3B12 | B7  | B7  | 3B7 |      |  |
| 3213                 | Bacteroidetes: Flavobacteria: Flavobacteriales: Flavobacteriaceae: Chryseobacterium                 | 61                           | 60   | 37  | 29  | 18  | 64   | 19                          | 48    | 13  | 17   | 24   | 70   | 5                         | 23  | 75   | 25   | 54   | 51   | 44                       | 43   | 23   | 26  | 35   | 15   | 35    | 10    | 34  | 60    | 14   | 18  | 31  | 21  |      |  |
| 4854                 | Bacteroidetes: Flavobacteria: Flavobacteriales: Flavobacteriaceae: Cloacibacterium                  | 61                           | 15   | 11  | 2   | 18  | 48   | 22                          | 28    | 19  | 11   | 11   | 25   | 2                         | 16  | 96   | 15   | 9    | 33   | 21                       | 27   | 32   | 15  | 16   | 77   | 16    | 230   | 4   | 117   | 56   | 3   | 26  | 16  | 23   |  |
| 681                  | Bacteroidetes: Sphingobacteria: Sphingobacteriales: Cytophagaaceae: Flectobacillus                  | 19                           | 9    | 6   | 1   | 10  | 9    | 4                           | 3     | 19  | 5    | 7    | 3    | 9                         | 4   | 13   | 3    | 8    | 8    | 7                        | 16   | 7    | 8   | 9    | 2    | 32    | 1     | 117 | 65    | 8    | 3   | 12  | 5   |      |  |
| 4912                 | Firmicutes: Bacilli: Bacillales: Bacillaceae: Bacillus                                              | 25                           | 3    | 21  | 5   | 4   | 64   | 2                           | 31    | 4   | 17   | 9    | 36   | 2                         | 15  | 44   | 21   | 8    | 20   | 8                        | 10   | 37   | 8   | 5    | 20   | 4     | 13    | 2   | 7     | 21   | 5   | 1   | 43  | 18   |  |
| 1568                 | Firmicutes: Bacilli: Bacillales: Staphylococaceae: Staphylococcus                                   | 16                           | 24   | 1   | 13  | 8   | 23   | 3                           | 25    | 6   | 8    | 9    | 15   | 2                         | 11  | 13   | 20   | 4    | 17   | 7                        | 17   | 21   | 8   | 14   | 21   | 5     | 26    | 1   | 10    | 29   | 5   | 2   | 21  | 19   |  |
| 1199                 | Firmicutes: Bacilli: Lactobacillales: Enterococcaceae: Enterococcus                                 | 19                           | 26   | 11  | 12  | 5   | 27   | 8                           | 16    | 8   | 9    | 12   | 22   | 4                         | 6   | 18   | 11   | 10   | 20   | 23                       | 15   | 20   | 7   | 9    | 7    | 4     | 15    | 4   | 11    | 29   | 6   | 6   | 6   | 12   |  |
| 2572                 | Firmicutes: Bacilli: Lactobacillales: Streptococcaceae: Enterococcus                                | 42                           | 52   | 21  | 23  | 19  | 52   | 11                          | 56    | 13  | 13   | 35   | 34   | 5                         | 14  | 48   | 21   | 23   | 53   | 28                       | 29   | 34   | 16  | 15   | 32   | 11    | 20    | 7   | 15    | 45   | 4   | 9   | 27  | 22   |  |
| 3978                 | Firmicutes: Bacilli: Lactobacillales: Leuconostocaceae                                              | 27                           | 27   | 20  | 16  | 14  | 41   | 7                           | 29    | 5   | 13   | 10   | 18   | 1                         | 18  | 28   | 9    | 6    | 29   | 19                       | 14   | 28   | 11  | 7    | 23   | 9     | 17    | 6   | 13    | 43   | 7   | 5   | 21  | 24   |  |
| 1328                 | Firmicutes: Bacilli: Lactobacillales: Leuconostocaceae: Leuconostoc                                 | 781                          | 836  | 329 | 286 | 289 | 863  | 223                         | 907   | 255 | 233  | 606  | 657  | 52                        | 318 | 764  | 382  | 285  | 770  | 398                      | 473  | 786  | 275 | 248  | 532  | 202   | 413   | 136 | 424   | 939  | 145 | 279 | 353 | 494  |  |
| 977                  | Firmicutes: Bacilli: Lactobacillales: Leuconostocaceae: Weissella                                   | 7                            | 13   | 7   | 4   | 5   | 10   | 4                           | 12    | 6   | 5    | 9    | 12   | 1                         | 4   | 12   | 12   | 3    | 14   | 2                        | 13   | 11   | 7   | 4    | 7    | 6     | 3     | 4   | 8     | 4    | 2   | 5   | 7   | 82   |  |
| 1372                 | Firmicutes: Bacilli: Lactobacillales: Leuconostocaceae: Weissella                                   | 131                          | 136  | 81  | 68  | 49  | 174  | 60                          | 160   | 35  | 46   | 117  | 142  | 17                        | 67  | 168  | 58   | 71   | 163  | 88                       | 95   | 145  | 71  | 51   | 107  | 41    | 95    | 28  | 114   | 212  | 29  | 64  | 73  | 82   |  |
| 4905                 | Firmicutes: Bacilli: Lactobacillales: Leuconostocaceae: Weissella                                   | 1700                         | 1827 | 769 | 632 | 700 | 2013 | 628                         | 2204  | 584 | 507  | 1284 | 1820 | 102                       | 749 | 1935 | 886  | 652  | 1774 | 961                      | 1115 | 1685 | 658 | 614  | 1333 | 512   | 1065  | 281 | 1043  | 2257 | 358 | 754 | 828 | 1086 |  |
| 5017                 | Firmicutes: Bacilli: Lactobacillales: Streptococcaceae: Weissella                                   | 14                           | 15   | 17  | 4   | 8   | 18   | 3                           | 15    | 3   | 2    | 7    | 23   | 1                         | 6   | 20   | 9    | 10   | 13   | 7                        | 10   | 13   | 8   | 4    | 18   | 3     | 8     | 1   | 7     | 21   | 9   | 12  | 5   | 9    |  |
| 384                  | Firmicutes: Bacilli: Lactobacillales: Streptococcaceae                                              | 37                           | 39   | 11  | 9   | 13  | 29   | 3                           | 27    | 10  | 7    | 20   | 25   | 6                         | 14  | 28   | 13   | 19   | 25   | 17                       | 15   | 14   | 9   | 15   | 17   | 9     | 14    | 7   | 13    | 32   | 5   | 5   | 6   | 14   |  |
| 277                  | Firmicutes: Bacilli: Lactobacillales: Streptococcaceae: Lactococcus                                 | 16                           | 23   | 10  | 6   | 7   | 10   | 1                           | 18    | 4   | 1    | 9    | 19   | 1                         | 3   | 22   | 12   | 5    | 13   | 5                        | 7    | 21   | 4   | 2    | 11   | 2     | 11    | 3   | 2     | 17   | 3   | 5   | 6   | 1    |  |
| 894                  | Firmicutes: Bacilli: Lactobacillales: Streptococcaceae: Lactococcus                                 | 421                          | 421  | 198 | 174 | 171 | 525  | 114                         | 576   | 128 | 137  | 311  | 360  | 38                        | 180 | 495  | 200  | 205  | 459  | 260                      | 286  | 437  | 179 | 140  | 291  | 125   | 211   | 64  | 227   | 534  | 86  | 137 | 203 | 264  |  |
| 1285                 | Firmicutes: Bacilli: Lactobacillales: Streptococcaceae: Lactococcus                                 | 42                           | 29   | 19  | 19  | 18  | 55   | 15                          | 65    | 15  | 12   | 21   | 46   | 2                         | 11  | 33   | 23   | 7    | 38   | 12                       | 21   | 49   | 9   | 12   | 29   | 6     | 16    | 8   | 31    | 46   | 10  | 15  | 25  | 33   |  |
| 1434                 | Firmicutes: Bacilli: Lactobacillales: Streptococcaceae: Lactococcus                                 | 199                          | 188  | 108 | 46  | 74  | 178  | 57                          | 245   | 44  | 41   | 141  | 190  | 22                        | 72  | 175  | 82   | 89   | 211  | 107                      | 90   | 178  | 75  | 69   | 125  | 58    | 90    | 46  | 111   | 237  | 71  | 74  | 130 | 122  |  |
| 2767                 | Firmicutes: Bacilli: Lactobacillales: Streptococcaceae: Lactococcus                                 | 17                           | 31   | 16  | 6   | 7   | 22   | 4                           | 18    | 4   | 7    | 9    | 26   | 2                         | 10  | 23   | 16   | 5    | 17   | 16                       | 19   | 9    | 6   | 21   | 3    | 6     | 6     | 12  | 20    | 9    | 5   | 10  | 13  |      |  |
| 2942                 | Firmicutes: Bacilli: Lactobacillales: Streptococcaceae: Lactococcus                                 | 238                          | 228  | 82  | 67  | 100 | 233  | 63                          | 287   | 75  | 56   | 137  | 219  | 18                        | 75  | 207  | 86   | 76   | 236  | 134                      | 127  | 175  | 73  | 76   | 144  | 62    | 133   | 47  | 107   | 253  | 94  | 66  | 99  | 120  |  |
| 708                  | Firmicutes: Bacilli: Lactobacillales: Streptococcaceae: Streptococcus                               | 20                           | 15   | 1   | 2   | 2   | 86   | 2                           | 9     | 7   | 3    | 7    | 9    | 2                         | 5   | 21   | 3    | 2    | 14   | 2                        | 1    | 8    | 3   | 3    | 8    | 4     | 1     | 3   | 7     | 9    | 2   | 3   | 11  | 3    |  |
| 997                  | Firmicutes: Bacilli: Lactobacillales: Streptococcaceae: Streptococcus                               | 56                           | 13   | 19  | 27  | 21  | 44   | 6                           | 42    | 11  | 18   | 22   | 83   | 1                         | 26  | 62   | 20   | 3    | 21   | 15                       | 25   | 45   | 9   | 13   | 66   | 10    | 29    | 7   | 15    | 27   | 7   | 20  | 22  | 33   |  |
| 5231                 | Firmicutes: Bacilli: Lactobacillales: Streptococcaceae: Streptococcus                               | 32                           | 29   | 43  | 14  | 10  | 51   | 9                           | 24    | 7   | 17   | 38   | 70   | 3                         | 24  | 84   | 105  | 137  | 213  | 105                      | 155  | 230  | 94  | 81   | 186  | 51    | 163   | 18  | 150   | 221  | 42  | 76  | 138 | 183  |  |
| 2533                 | Firmicutes: Clostridia: Clostridiales: Veillonellaceae: Veillonella                                 | 70                           | 48   | 31  | 20  | 27  | 62   | 15                          | 88    | 30  | 17   | 40   | 62   | 5                         | 37  | 51   | 29   | 28   | 50   | 33                       | 37   | 63   | 14  | 9    | 34   | 21    | 29    | 16  | 17    | 62   | 11  | 18  | 11  | 34   |  |
| 0                    | Proteobacteria: Alphaproteobacteria: Rhizobiales: Bradyrhizobiacae                                  | 44                           | 40   | 4   | 15  | 16  | 74   | 7                           | 54    | 12  | 19   | 31   | 56   | 7                         | 12  | 60   | 35   | 16   | 50   | 31                       | 49   | 50   | 18  | 44   | 30   | 14    | 26    | 3   | 30    | 52   | 6   | 12  | 25  | 34   |  |
| 3190                 | Proteobacteria: Alphaproteobacteria: Rhizobiales: Bradyrhizobiacae                                  | 56                           | 47   | 7   | 17  | 20  | 85   | 43                          | 43    | 26  | 8    | 42   | 68   | 26                        | 19  | 102  | 22   | 30   | 59   | 39                       | 46   | 64   | 72  | 50   | 51   | 36    | 78    | 6   | 77    | 84   | 9   | 19  | 39  | 23   |  |
| 2938                 | Proteobacteria: Alphaproteobacteria: Sphingomonadales: Sphingomonadaceae                            | 156                          | 124  | 17  | 54  | 53  | 164  | 113                         | 142   | 49  | 41   | 70   | 170  | 66                        | 77  | 178  | 75   | 32   | 132  | 93                       | 119  | 140  | 86  | 118  | 129  | 58    | 222   | 17  | 104   | 177  | 27  | 57  | 100 | 62   |  |
| 1945                 | Proteobacteria: Alphaproteobacteria: Sphingomonadales: Sphingomonadaceae: Sphingomonas              | 1882                         | 1650 | 131 | 582 | 610 | 1876 | 705                         | 1651  | 485 | 429  | 968  | 1612 | 189                       | 552 | 1727 | 683  | 418  | 1777 | 882                      | 1141 | 1593 | 523 | 1104 | 1113 | 469   | 1489  | 166 | 864   | 1755 | 214 | 484 | 931 | 940  |  |
| 3461                 | Proteobacteria: Alphaproteobacteria: Sphingomonadales: Sphingomonadaceae: Sphingomonas              | 49                           | 48   | 1   | 19  | 14  | 72   | 32                          | 51    | 16  | 16   | 20   | 62   | 11                        | 12  | 59   | 25   | 11   | 50   | 30                       | 37   | 47   | 13  | 38   | 43   | 13    | 43    | 7   | 24    | 55   | 8   | 18  | 35  | 43   |  |
| 4139                 | Proteobacteria: Alphaproteobacteria: Sphingomonadales: Sphingomonadaceae: Sphingomonas              | 26                           | 34   | 4   | 5   | 7   | 34   | 22                          | 25    | 18  | 13   | 27   | 41   | 6                         | 9   | 23   | 14   | 5    | 21   | 17                       | 40   | 35   | 16  | 18   | 22   | 9     | 44    | 5   | 12    | 33   | 12  | 13  | 19  | 23   |  |
| 2263                 | Proteobacteria: Betaproteobacteria: Burkholderiales: Burkholderiales: Incertae sedis: Aquabacterium | 15                           | 8    | 9   | 5   | 8   | 12   | 6                           | 18    | 7   | 2    | 13   | 12   | 2                         | 3   | 40   | 5    | 3    | 16   | 4                        | 11   | 10   | 7   | 7    | 49   | 8     | 98    | 1   | 9     | 30   | 2   | 4   | 7   | 7    |  |
| 1855                 | Proteobacteria: Betaproteobacteria: Burkholderiales: Comamonadaceae: Acidovorax                     | 37                           | 26   | 10  | 2   | 10  | 25   | 8                           | 35    | 11  | 8    | 17   | 56   | 3                         | 10  | 68   | 19   | 15   | 26   | 19                       | 11   | 14   | 9   | 5    | 39   | 8     | 63    | 8   | 13    | 41   | 7   | 14  | 11  | 24   |  |
| 2759                 | Proteobacteria: Betaproteobacteria: Burkholderiales: Comamonadaceae: Acidovorax                     | 64                           | 42   | 18  | 10  | 27  | 56   | 18                          | 54    | 17  | 14   | 32   | 40   | 3                         | 16  | 107  | 64   | 9    | 42   | 24                       | 30   | 44   | 15  | 20   | 112  | 16    | 187   | 4   | 21    | 48   | 15  | 20  | 22  | 31   |  |
| 3468                 | Proteobacteria: Betaproteobacteria: Burkholderiales: Comamonadaceae: Diaphorobacter                 | 35                           | 18   | 5   | 13  | 12  | 25   | 11                          | 37    | 11  | 5    | 15   | 15   | 2                         | 14  | 105  | 26   | 12   | 32   | 15                       | 22   | 26   | 12  | 10   | 81   | 6     | 119   | 2   | 12    | 49   | 5   | 16  | 9   | 8    |  |
| 2509                 | Proteobacteria: Betaproteobacteria: Neisseriales: Neisseriaceae: Microvirgula                       | 43                           | 25   | 25  | 24  | 10  | 45   | 8                           | 32    | 10  | 8    | 29   | 98   | 6                         | 23  | 27   | 17   | 39   | 40   | 19                       | 24   | 40   | 16  | 17   | 21   | 16    | 22    | 7   | 26    | 50   | 3   | 11  | 17  | 13   |  |
| 2794                 | Proteobacteria: Epsilonproteobacteria: Campylobacteriales: Campylobacteriaceae: Arcobacter          | 58                           | 53   | 38  | 14  | 21  | 67   | 16                          | 73    | 15  | 22   | 41   | 148  | 4                         | 23  | 42   | 34   | 42   | 52   | 37                       | 32   | 72   | 21  | 24   | 25   | 21    | 20    | 11  | 38    | 60   | 6   | 25  | 33  | 32   |  |
| 446                  | Proteobacteria: Gammaproteobacteria: Aeromonadales: Aeromonadaceae: Aeromonas                       | 15                           | 23   | 6   | 6   | 6   | 18   | 6                           | 20    | 6   | 2    | 13   | 23   | 1                         | 5   | 6    | 12   | 8    | 27   | 10                       | 13   | 20   | 12  | 5    | 15   | 6     | 11    | 1   | 21    | 22   | 2   | 4   | 9   | 8    |  |
| 4341                 | Proteobacteria: Gammaproteobacteria: Enterobacteriales: Enterobacteriaceae                          | 22                           | 14   | 14  | 4   | 5   | 22   | 1                           | 21    | 6   | 5    | 15   | 21   | 1                         | 1   | 5    | 10   | 8    | 14   | 30                       | 14   | 11   | 9   | 12   | 12   | 6     | 11    | 3   | 5     | 29   | 4   | 6   | 6   | 17   |  |
| 3441                 | Proteobacteria: Gammaproteobacteria: Enterobacteriales: Enterobacteriaceae: Citrobacter             | 372                          | 336  | 185 | 149 | 137 | 345  | 108                         | 408   | 107 | 113  | 265  | 426  | 62                        | 156 | 342  | 159  | 219  | 354  | 276                      | 198  | 381  | 162 | 166  | 244  | 135   | 189   | 69  | 195   | 345  | 77  | 104 | 156 | 245  |  |
| 460                  | Proteobacteria: Gammaproteobacteria: Enterobacteriales: Enterobacteriaceae: Erwnia                  | 21                           | 11   | 5   | 6   | 10  | 20   | 166                         | 14    | 12  | 11   | 7    | 15   | 246                       | 5   | 10   | 17   | 5    | 10   | 12                       | 8    | 13   | 314 | 4    | 11   | 11    | 42    | 1   | 10    | 24   | 6   | 13  | 7   | 7    |  |
| 3492                 | Proteobacteria: Gammaproteobacteria: Enterobacteriales: Enterobacteriaceae: Escherichia/Shigella    | 20                           | 29   | 10  | 10  | 31  | 16   | 9                           | 20    | 34  | 15   | 23   | 24   | 13                        | 15  | 15   | 14   | 8    | 27   | 15                       | 14   | 16   | 28  | 13   | 14   | 5     | 69    | 3   | 284   | 165  | 12  | 5   | 9   | 9    |  |
| 1488                 | Proteobacteria: Gammaproteobacteria: Enterobacteriales: Enterobacteriaceae: Klebsiella              | 25                           | 45   | 26  | 15  | 14  | 66   | 12                          | 46    | 15  | 15   | 39   | 53   | 6                         | 25  | 43   | 16   | 20   | 41   | 31                       | 30   | 43   | 19  | 14   | 27   | 17    | 24    | 7   | 18    | 80   | 13  | 15  | 23  | 22   |  |
| 3907                 | Proteobacteria: Gammaproteobacteria: Enterobacteriales: Enterobacteriaceae: Pantoea                 | 17                           | 23   | 6   | 2   | 12  | 28   | 193                         | 16    | 12  | 6    | 11   | 4    | 325                       | 1   | 21   |      |      |      |                          |      |      |     |      |      |       |       |     |       |      |     |     |     |      |  |

Table S6. Fishmeal-based, high density treatment core microbiota<sup>1</sup>

| #OTU ID <sup>2</sup> | Consensus Lineage <sup>3</sup>                                                      | 1B1  | 2B1  | 3B1 | 1B4 | 2B4 | 3B4  |
|----------------------|-------------------------------------------------------------------------------------|------|------|-----|-----|-----|------|
| 4842                 | Actinobacteria;Actinobacteria;Actinomycetales;Actinomycetaceae;Actinomyces          | 5    | 2    | 2   | 2   | 1   | 3    |
| 2074                 | Actinobacteria;Actinobacteria;Actinomycetales;Corynebacteriaceae;Corynebacterium    | 2    | 2    | 3   | 3   | 1   | 4    |
| 2949                 | Actinobacteria;Actinobacteria;Actinomycetales;Corynebacteriaceae;Corynebacterium    | 16   | 5    | 1   | 2   | 1   | 8    |
| 3338                 | Actinobacteria;Actinobacteria;Actinomycetales;Corynebacteriaceae;Corynebacterium    | 6    | 2    | 2   | 4   | 4   | 5    |
| 4906                 | Bacteroidetes;Flavobacteria;Flavobacteriales;Flavobacteriaceae                      | 7    | 3    | 2   | 1   | 1   | 1    |
| 3213                 | Bacteroidetes;Flavobacteria;Flavobacteriales;Flavobacteriaceae;Chryseobacterium     | 61   | 60   | 37  | 29  | 18  | 64   |
| 80                   | Bacteroidetes;Flavobacteria;Flavobacteriales;Flavobacteriaceae;Chryseobacterium     | 6    | 2    | 7   | 3   | 3   | 6    |
| 4854                 | Bacteroidetes;Flavobacteria;Flavobacteriales;Flavobacteriaceae;Cloacibacterium      | 61   | 15   | 11  | 2   | 18  | 48   |
| 681                  | Bacteroidetes;Sphingobacteria;Sphingobacteriales;Cytophagaceae;Flectobacillus       | 19   | 9    | 6   | 1   | 10  | 9    |
| 111                  | Firmicutes;Bacilli;Bacillales;Bacillaceae;Bacillus                                  | 8    | 1    | 2   | 2   | 2   | 28   |
| 4912                 | Firmicutes;Bacilli;Bacillales;Bacillaceae;Bacillus                                  | 25   | 3    | 21  | 5   | 4   | 64   |
| 1568                 | Firmicutes;Bacilli;Bacillales;Staphylococcaceae;Staphylococcus                      | 16   | 24   | 1   | 13  | 8   | 23   |
| 1199                 | Firmicutes;Bacilli;Lactobacillales;Enterococcaceae;Enterococcus                     | 19   | 26   | 11  | 12  | 5   | 27   |
| 2572                 | Firmicutes;Bacilli;Lactobacillales;Enterococcaceae;Enterococcus                     | 42   | 52   | 21  | 23  | 19  | 52   |
| 5230                 | Firmicutes;Bacilli;Lactobacillales;Enterococcaceae;Enterococcus                     | 4    | 13   | 3   | 3   | 5   | 11   |
| 4699                 | Firmicutes;Bacilli;Lactobacillales;Enterococcaceae;Vagococcus                       | 1    | 5    | 2   | 1   | 1   | 10   |
| 1802                 | Firmicutes;Bacilli;Lactobacillales;Lactobacillaceae;Lactobacillus                   | 6    | 6    | 8   | 5   | 4   | 10   |
| 1815                 | Firmicutes;Bacilli;Lactobacillales;Lactobacillaceae;Lactobacillus                   | 28   | 12   | 11  | 11  | 1   | 13   |
| 3978                 | Firmicutes;Bacilli;Lactobacillales;Leuconostocaceae                                 | 27   | 27   | 20  | 16  | 14  | 41   |
| 1328                 | Firmicutes;Bacilli;Lactobacillales;Leuconostocaceae;Leuconostoc                     | 781  | 836  | 329 | 286 | 289 | 863  |
| 1052                 | Firmicutes;Bacilli;Lactobacillales;Leuconostocaceae;Leuconostoc                     | 1    | 4    | 10  | 3   | 1   | 6    |
| 1417                 | Firmicutes;Bacilli;Lactobacillales;Leuconostocaceae;Leuconostoc                     | 3    | 3    | 2   | 3   | 1   | 6    |
| 977                  | Firmicutes;Bacilli;Lactobacillales;Leuconostocaceae;Weissella                       | 7    | 13   | 7   | 4   | 5   | 10   |
| 1372                 | Firmicutes;Bacilli;Lactobacillales;Leuconostocaceae;Weissella                       | 131  | 136  | 81  | 68  | 49  | 174  |
| 4905                 | Firmicutes;Bacilli;Lactobacillales;Leuconostocaceae;Weissella                       | 1700 | 1827 | 769 | 632 | 700 | 2013 |
| 5017                 | Firmicutes;Bacilli;Lactobacillales;Leuconostocaceae;Weissella                       | 14   | 15   | 17  | 4   | 8   | 18   |
| 1138                 | Firmicutes;Bacilli;Lactobacillales;Leuconostocaceae;Weissella                       | 5    | 5    | 3   | 4   | 5   | 13   |
| 1588                 | Firmicutes;Bacilli;Lactobacillales;Leuconostocaceae;Weissella                       | 1    | 2    | 3   | 2   | 2   | 3    |
| 384                  | Firmicutes;Bacilli;Lactobacillales;Streptococcaceae                                 | 37   | 39   | 11  | 9   | 13  | 29   |
| 277                  | Firmicutes;Bacilli;Lactobacillales;Streptococcaceae;Lactococcus                     | 16   | 23   | 10  | 6   | 7   | 10   |
| 894                  | Firmicutes;Bacilli;Lactobacillales;Streptococcaceae;Lactococcus                     | 421  | 421  | 198 | 174 | 171 | 525  |
| 1265                 | Firmicutes;Bacilli;Lactobacillales;Streptococcaceae;Lactococcus                     | 42   | 29   | 19  | 19  | 18  | 55   |
| 1404                 | Firmicutes;Bacilli;Lactobacillales;Streptococcaceae;Lactococcus                     | 199  | 188  | 108 | 46  | 74  | 178  |
| 2767                 | Firmicutes;Bacilli;Lactobacillales;Streptococcaceae;Lactococcus                     | 17   | 31   | 16  | 6   | 7   | 22   |
| 2942                 | Firmicutes;Bacilli;Lactobacillales;Streptococcaceae;Lactococcus                     | 238  | 228  | 82  | 67  | 100 | 233  |
| 4516                 | Firmicutes;Bacilli;Lactobacillales;Streptococcaceae;Lactococcus                     | 4    | 3    | 3   | 6   | 3   | 5    |
| 95                   | Firmicutes;Bacilli;Lactobacillales;Streptococcaceae;Streptococcus                   | 2    | 3    | 2   | 1   | 1   | 4    |
| 1323                 | Firmicutes;Bacilli;Lactobacillales;Streptococcaceae;Streptococcus                   | 24   | 7    | 3   | 8   | 7   | 31   |
| 708                  | Firmicutes;Bacilli;Lactobacillales;Streptococcaceae;Streptococcus                   | 20   | 15   | 1   | 2   | 2   | 66   |
| 997                  | Firmicutes;Bacilli;Lactobacillales;Streptococcaceae;Streptococcus                   | 56   | 13   | 19  | 27  | 21  | 44   |
| 5231                 | Firmicutes;Bacilli;Lactobacillales;Streptococcaceae;Streptococcus                   | 32   | 29   | 43  | 14  | 10  | 51   |
| 2897                 | Firmicutes;Clostridia;Clostridiales                                                 | 4    | 1    | 1   | 2   | 1   | 3    |
| 5459                 | Firmicutes;Clostridia;Clostridiales;Clostridiaceae;Clostridium                      | 1    | 2    | 4   | 2   | 2   | 11   |
| 1673                 | Firmicutes;Clostridia;Clostridiales;Incertae Sedis XI                               | 16   | 1    | 7   | 3   | 5   | 13   |
| 781                  | Firmicutes;Clostridia;Clostridiales;Peptococcaceae;Peptococcus                      | 4    | 1    | 1   | 3   | 2   | 2    |
| 4580                 | Firmicutes;Clostridia;Clostridiales;Peptostreptococcaceae                           | 9    | 8    | 7   | 3   | 3   | 33   |
| 2533                 | Firmicutes;Clostridia;Clostridiales;Veillonellaceae;Veillonella                     | 70   | 48   | 31  | 20  | 27  | 62   |
| 3480                 | Firmicutes;Clostridia;Clostridiales;Veillonellaceae;Veillonella                     | 4    | 1    | 3   | 2   | 2   | 3    |
| 2022                 | Fusobacteria;Fusobacteria;Fusobacteriales;Fusobacteriaceae                          | 2    | 1    | 6   | 1   | 4   | 7    |
| 1410                 | Proteobacteria;Alphaproteobacteria;Alphaproteobacteria_incertae_sedis;Novispirillum | 2    | 2    | 3   | 3   | 8   | 4    |
| 1864                 | Proteobacteria;Alphaproteobacteria;Caulobacterales;Caulobacteraceae;Asticcacaulis   | 9    | 1    | 1   | 1   | 1   | 1    |
| 2338                 | Proteobacteria;Alphaproteobacteria;Rhizobiales                                      | 15   | 7    | 2   | 2   | 3   | 8    |
| 0                    | Proteobacteria;Alphaproteobacteria;Rhizobiales;Bradyrhizobiaceae                    | 44   | 40   | 4   | 15  | 16  | 74   |
| 3190                 | Proteobacteria;Alphaproteobacteria;Rhizobiales;Bradyrhizobiaceae                    | 56   | 47   | 7   | 17  | 20  | 85   |
| 1316                 | Proteobacteria;Alphaproteobacteria;Sphingomonadales;Sphingomonadaceae               | 5    | 5    | 1   | 3   | 3   | 3    |
| 2938                 | Proteobacteria;Alphaproteobacteria;Sphingomonadales;Sphingomonadaceae               | 156  | 124  | 17  | 54  | 53  | 164  |
| 1945                 | Proteobacteria;Alphaproteobacteria;Sphingomonadales;Sphingomonadaceae;Sphingomonas  | 1882 | 1650 | 131 | 582 | 610 | 1876 |
| 3461                 | Proteobacteria;Alphaproteobacteria;Sphingomonadales;Sphingomonadaceae;Sphingomonas  | 49   | 48   | 1   | 19  | 14  | 72   |
| 4139                 | Proteobacteria;Alphaproteobacteria;Sphingomonadales;Sphingomonadaceae;Sphingomonas  | 26   | 34   | 4   | 5   | 7   | 34   |

|      |                                                                                                |     |     |     |     |     |     |
|------|------------------------------------------------------------------------------------------------|-----|-----|-----|-----|-----|-----|
| 1816 | Proteobacteria;Betaproteobacteria;Burkholderiales                                              | 5   | 6   | 1   | 1   | 4   | 4   |
| 5544 | Proteobacteria;Betaproteobacteria;Burkholderiales;Alcaligenaceae                               | 3   | 2   | 1   | 2   | 2   | 3   |
| 2263 | Proteobacteria;Betaproteobacteria;Burkholderiales;Burkholderiales_incertae_sedis;Aquabacterium | 15  | 8   | 9   | 5   | 8   | 12  |
| 2016 | Proteobacteria;Betaproteobacteria;Burkholderiales;Comamonadaceae;Acidovorax                    | 6   | 4   | 4   | 6   | 1   | 4   |
| 1855 | Proteobacteria;Betaproteobacteria;Burkholderiales;Comamonadaceae;Acidovorax                    | 37  | 26  | 10  | 2   | 10  | 25  |
| 2759 | Proteobacteria;Betaproteobacteria;Burkholderiales;Comamonadaceae;Acidovorax                    | 64  | 42  | 18  | 10  | 27  | 56  |
| 3903 | Proteobacteria;Betaproteobacteria;Burkholderiales;Comamonadaceae;Comamonas                     | 5   | 1   | 3   | 2   | 3   | 13  |
| 3468 | Proteobacteria;Betaproteobacteria;Burkholderiales;Comamonadaceae;Diaphorobacter                | 35  | 18  | 5   | 13  | 12  | 25  |
| 2509 | Proteobacteria;Betaproteobacteria;Neisseriales;Neisseriaceae;Microvirgula                      | 43  | 25  | 25  | 24  | 10  | 45  |
| 5201 | Proteobacteria;Betaproteobacteria;Neisseriales;Neisseriaceae;Vitrosocilla                      | 2   | 11  | 9   | 4   | 1   | 11  |
| 3896 | Proteobacteria;Betaproteobacteria;Neisseriales;Neisseriaceae;Vogesella                         | 1   | 6   | 3   | 2   | 4   | 7   |
| 5399 | Proteobacteria;Betaproteobacteria;Rhodocyclales;Rhodocyclaceae;Azonexus                        | 5   | 1   | 4   | 1   | 3   | 4   |
| 2794 | Proteobacteria;Epsilonproteobacteria;Campylobacteriales;Campylobacteraceae;Arcobacter          | 58  | 53  | 38  | 14  | 21  | 67  |
| 85   | Proteobacteria;Epsilonproteobacteria;Campylobacteriales;Campylobacteraceae;Sulfurospirillum    | 7   | 9   | 6   | 2   | 8   | 8   |
| 446  | Proteobacteria;Gammaproteobacteria;Aeromonadales;Aeromonadaceae;Aeromonas                      | 15  | 23  | 6   | 6   | 6   | 18  |
| 3236 | Proteobacteria;Gammaproteobacteria;Aeromonadales;Aeromonadaceae;Aeromonas                      | 3   | 6   | 4   | 2   | 1   | 1   |
| 4341 | Proteobacteria;Gammaproteobacteria;Enterobacteriales;Enterobacteriaceae                        | 22  | 14  | 14  | 4   | 5   | 22  |
| 4497 | Proteobacteria;Gammaproteobacteria;Enterobacteriales;Enterobacteriaceae                        | 22  | 26  | 12  | 10  | 11  | 16  |
| 3841 | Proteobacteria;Gammaproteobacteria;Enterobacteriales;Enterobacteriaceae;Citrobacter            | 372 | 336 | 185 | 149 | 137 | 345 |
| 460  | Proteobacteria;Gammaproteobacteria;Enterobacteriales;Enterobacteriaceae;Erwinia                | 21  | 11  | 5   | 6   | 10  | 20  |
| 3492 | Proteobacteria;Gammaproteobacteria;Enterobacteriales;Enterobacteriaceae;Escherichia/Shigella   | 20  | 29  | 10  | 10  | 31  | 16  |
| 1488 | Proteobacteria;Gammaproteobacteria;Enterobacteriales;Enterobacteriaceae;Klebsiella             | 25  | 45  | 26  | 15  | 14  | 66  |
| 3907 | Proteobacteria;Gammaproteobacteria;Enterobacteriales;Enterobacteriaceae;Pantoea                | 17  | 23  | 6   | 2   | 12  | 28  |
| 3848 | Proteobacteria;Gammaproteobacteria;Pseudomonadales;Moraxellaceae                               | 5   | 7   | 12  | 8   | 4   | 5   |
| 5154 | Proteobacteria;Gammaproteobacteria;Pseudomonadales;Moraxellaceae                               | 20  | 29  | 19  | 23  | 15  | 35  |
| 197  | Proteobacteria;Gammaproteobacteria;Pseudomonadales;Moraxellaceae;Acinetobacter                 | 10  | 13  | 3   | 3   | 3   | 10  |
| 563  | Proteobacteria;Gammaproteobacteria;Pseudomonadales;Moraxellaceae;Acinetobacter                 | 7   | 6   | 6   | 4   | 2   | 9   |
| 526  | Proteobacteria;Gammaproteobacteria;Pseudomonadales;Moraxellaceae;Acinetobacter                 | 97  | 83  | 36  | 54  | 37  | 123 |
| 893  | Proteobacteria;Gammaproteobacteria;Pseudomonadales;Moraxellaceae;Acinetobacter                 | 53  | 62  | 32  | 31  | 31  | 51  |
| 1370 | Proteobacteria;Gammaproteobacteria;Pseudomonadales;Moraxellaceae;Acinetobacter                 | 61  | 74  | 30  | 32  | 32  | 63  |
| 2675 | Proteobacteria;Gammaproteobacteria;Pseudomonadales;Moraxellaceae;Acinetobacter                 | 189 | 220 | 133 | 108 | 90  | 243 |
| 1192 | Proteobacteria;Gammaproteobacteria;Pseudomonadales;Moraxellaceae;Enhydrobacter                 | 11  | 10  | 6   | 6   | 2   | 13  |
| 2828 | Proteobacteria;Gammaproteobacteria;Pseudomonadales;Moraxellaceae;Enhydrobacter                 | 52  | 23  | 8   | 15  | 11  | 48  |
| 3197 | Proteobacteria;Gammaproteobacteria;Pseudomonadales;Moraxellaceae;Enhydrobacter                 | 16  | 12  | 2   | 7   | 4   | 17  |
| 2252 | Proteobacteria;Gammaproteobacteria;Pseudomonadales;Pseudomonadaceae;Pseudomonas                | 4   | 9   | 1   | 4   | 5   | 18  |
| 5089 | Proteobacteria;Gammaproteobacteria;Pseudomonadales;Pseudomonadaceae;Pseudomonas                | 15  | 1   | 2   | 1   | 4   | 4   |
| 684  | Proteobacteria;Gammaproteobacteria;Pseudomonadales;Pseudomonadaceae;Pseudomonas                | 9   | 34  | 9   | 7   | 12  | 9   |
| 922  | unclassified Bacteria                                                                          | 3   | 2   | 2   | 1   | 1   | 5   |
| 1386 | unclassified Bacteria                                                                          | 5   | 8   | 3   | 9   | 6   | 4   |
| 3794 | unclassified Bacteria                                                                          | 23  | 23  | 21  | 14  | 14  | 16  |
| 4670 | unclassified Bacteria                                                                          | 14  | 11  | 3   | 1   | 8   | 21  |

Footnotes:

1. OTUs appearing in every fish reared at high density on a fishmeal diet. Table values constitute the number of times a give OTU is observed in each sample.
2. Sequences were grouped in an OTU if they share 97% or more identity to a representative sequence
3. Taxonomy assigned if at least 90% of sequences in the OTU are in agreement for the classification



Table S7. Fishmeal-based, low density treatment core microbiota<sup>1</sup>

| #OTU ID <sup>2</sup> | Consensus Lineage <sup>3</sup>                                                                 | 1B10 | 2B10 | 3B10 | 1B3 | 2B3  | 3B3  | 1B5 | 2B5 | 3B5  |
|----------------------|------------------------------------------------------------------------------------------------|------|------|------|-----|------|------|-----|-----|------|
| 2949                 | Actinobacteria;Actinobacteria;Actinomycetales;Corynebacteriaceae;Corynebacterium               | 4    | 5    | 3    | 3   | 11   | 14   | 2   | 1   | 20   |
| 4311                 | Actinobacteria;Actinobacteria;Actinomycetales;Microbacteriaceae;Leifsonia                      | 5    | 11   | 1    | 1   | 4    | 7    | 1   | 5   | 9    |
| 3213                 | Bacteroidetes;Flavobacteria;Flavobacteriales;Flavobacteriaceae;Chryseobacterium                | 19   | 48   | 13   | 17  | 24   | 70   | 5   | 23  | 75   |
| 4854                 | Bacteroidetes;Flavobacteria;Flavobacteriales;Flavobacteriaceae;Cloacibacterium                 | 22   | 28   | 19   | 11  | 11   | 25   | 2   | 16  | 96   |
| 681                  | Bacteroidetes;Sphingobacteria;Sphingobacteriales;Cytophagaceae;Flectobacillus                  | 4    | 3    | 19   | 5   | 7    | 3    | 9   | 4   | 13   |
| 4912                 | Firmicutes;Bacilli;Bacillales;Bacillaceae;Bacillus                                             | 2    | 31   | 4    | 17  | 9    | 36   | 2   | 15  | 44   |
| 111                  | Firmicutes;Bacilli;Bacillales;Bacillaceae;Bacillus                                             | 8    | 14   | 6    | 5   | 4    | 9    | 13  | 3   | 6    |
| 1568                 | Firmicutes;Bacilli;Bacillales;Staphylococcaceae;Staphylococcus                                 | 3    | 25   | 6    | 8   | 9    | 15   | 2   | 11  | 13   |
| 1199                 | Firmicutes;Bacilli;Lactobacillales;Enterococcaceae;Enterococcus                                | 8    | 16   | 8    | 9   | 12   | 22   | 4   | 6   | 18   |
| 2572                 | Firmicutes;Bacilli;Lactobacillales;Enterococcaceae;Enterococcus                                | 11   | 56   | 13   | 13  | 35   | 34   | 5   | 14  | 48   |
| 3526                 | Firmicutes;Bacilli;Lactobacillales;Lactobacillaceae;Lactobacillus                              | 5    | 10   | 1    | 1   | 5    | 7    | 1   | 3   | 8    |
| 3978                 | Firmicutes;Bacilli;Lactobacillales;Leuconostocaceae                                            | 7    | 29   | 5    | 13  | 10   | 18   | 1   | 18  | 28   |
| 1328                 | Firmicutes;Bacilli;Lactobacillales;Leuconostocaceae;Leuconostoc                                | 223  | 907  | 255  | 233 | 606  | 657  | 52  | 318 | 764  |
| 1052                 | Firmicutes;Bacilli;Lactobacillales;Leuconostocaceae;Leuconostoc                                | 4    | 3    | 1    | 6   | 11   | 4    | 1   | 6   | 11   |
| 977                  | Firmicutes;Bacilli;Lactobacillales;Leuconostocaceae;Weissella                                  | 4    | 12   | 6    | 5   | 9    | 12   | 1   | 4   | 12   |
| 1372                 | Firmicutes;Bacilli;Lactobacillales;Leuconostocaceae;Weissella                                  | 60   | 160  | 35   | 46  | 117  | 142  | 17  | 67  | 168  |
| 4905                 | Firmicutes;Bacilli;Lactobacillales;Leuconostocaceae;Weissella                                  | 528  | 2204 | 584  | 507 | 1284 | 1820 | 102 | 749 | 1935 |
| 5017                 | Firmicutes;Bacilli;Lactobacillales;Leuconostocaceae;Weissella                                  | 3    | 15   | 3    | 2   | 7    | 23   | 1   | 6   | 20   |
| 1138                 | Firmicutes;Bacilli;Lactobacillales;Leuconostocaceae;Weissella                                  | 4    | 11   | 2    | 1   | 4    | 4    | 1   | 5   | 10   |
| 384                  | Firmicutes;Bacilli;Lactobacillales;Streptococcaceae                                            | 3    | 27   | 10   | 7   | 20   | 25   | 6   | 14  | 28   |
| 277                  | Firmicutes;Bacilli;Lactobacillales;Streptococcaceae;Lactococcus                                | 1    | 18   | 4    | 1   | 9    | 19   | 1   | 3   | 22   |
| 894                  | Firmicutes;Bacilli;Lactobacillales;Streptococcaceae;Lactococcus                                | 114  | 576  | 128  | 137 | 311  | 360  | 38  | 180 | 495  |
| 1265                 | Firmicutes;Bacilli;Lactobacillales;Streptococcaceae;Lactococcus                                | 15   | 65   | 15   | 12  | 21   | 46   | 2   | 11  | 33   |
| 1404                 | Firmicutes;Bacilli;Lactobacillales;Streptococcaceae;Lactococcus                                | 57   | 245  | 44   | 41  | 141  | 190  | 22  | 72  | 175  |
| 2767                 | Firmicutes;Bacilli;Lactobacillales;Streptococcaceae;Lactococcus                                | 4    | 18   | 4    | 7   | 9    | 29   | 2   | 10  | 23   |
| 2942                 | Firmicutes;Bacilli;Lactobacillales;Streptococcaceae;Lactococcus                                | 63   | 287  | 75   | 56  | 137  | 219  | 18  | 75  | 207  |
| 708                  | Firmicutes;Bacilli;Lactobacillales;Streptococcaceae;Streptococcus                              | 2    | 9    | 7    | 3   | 7    | 9    | 2   | 5   | 21   |
| 997                  | Firmicutes;Bacilli;Lactobacillales;Streptococcaceae;Streptococcus                              | 6    | 42   | 11   | 18  | 22   | 83   | 1   | 26  | 62   |
| 5231                 | Firmicutes;Bacilli;Lactobacillales;Streptococcaceae;Streptococcus                              | 9    | 24   | 7    | 17  | 38   | 70   | 3   | 24  | 84   |
| 1323                 | Firmicutes;Bacilli;Lactobacillales;Streptococcaceae;Streptococcus                              | 2    | 7    | 6    | 6   | 14   | 18   | 1   | 7   | 30   |
| 2533                 | Firmicutes;Clostridia;Clostridiales;Veillonellaceae;Veillonella                                | 15   | 88   | 30   | 17  | 40   | 62   | 5   | 37  | 51   |
| 649                  | Proteobacteria;Alphaproteobacteria;Rhizobiales                                                 | 3    | 16   | 1    | 1   | 6    | 9    | 7   | 4   | 8    |
| 2338                 | Proteobacteria;Alphaproteobacteria;Rhizobiales                                                 | 3    | 4    | 5    | 2   | 5    | 8    | 8   | 4   | 11   |
| 0                    | Proteobacteria;Alphaproteobacteria;Rhizobiales;Bradyrhizobiaceae                               | 7    | 54   | 12   | 19  | 31   | 56   | 7   | 12  | 60   |
| 3190                 | Proteobacteria;Alphaproteobacteria;Rhizobiales;Bradyrhizobiaceae                               | 43   | 43   | 26   | 8   | 42   | 68   | 26  | 19  | 102  |
| 5588                 | Proteobacteria;Alphaproteobacteria;Sphingomonadales                                            | 9    | 9    | 7    | 6   | 3    | 23   | 3   | 7   | 10   |
| 2938                 | Proteobacteria;Alphaproteobacteria;Sphingomonadales;Sphingomonadaceae                          | 113  | 142  | 49   | 41  | 70   | 170  | 66  | 77  | 178  |
| 2751                 | Proteobacteria;Alphaproteobacteria;Sphingomonadales;Sphingomonadaceae                          | 4    | 1    | 1    | 3   | 4    | 4    | 2   | 3   | 6    |
| 3451                 | Proteobacteria;Alphaproteobacteria;Sphingomonadales;Sphingomonadaceae;Novosphingobium          | 10   | 8    | 1    | 4   | 3    | 14   | 7   | 4   | 12   |
| 1945                 | Proteobacteria;Alphaproteobacteria;Sphingomonadales;Sphingomonadaceae;Sphingomonas             | 705  | 1651 | 485  | 429 | 968  | 1612 | 189 | 552 | 1727 |
| 3461                 | Proteobacteria;Alphaproteobacteria;Sphingomonadales;Sphingomonadaceae;Sphingomonas             | 32   | 51   | 16   | 16  | 20   | 62   | 11  | 12  | 59   |
| 4139                 | Proteobacteria;Alphaproteobacteria;Sphingomonadales;Sphingomonadaceae;Sphingomonas             | 22   | 25   | 18   | 13  | 27   | 41   | 6   | 9   | 23   |
| 3105                 | Proteobacteria;Betaproteobacteria;Burkholderiales;Burkholderiaceae;Burkholderia                | 1    | 16   | 2    | 3   | 5    | 6    | 1   | 8   | 12   |
| 2263                 | Proteobacteria;Betaproteobacteria;Burkholderiales;Burkholderiales_incertae_sedis;Aquabacterium | 6    | 18   | 7    | 2   | 13   | 12   | 2   | 3   | 40   |
| 1855                 | Proteobacteria;Betaproteobacteria;Burkholderiales;Comamonadaceae;Acidovorax                    | 8    | 35   | 11   | 8   | 17   | 56   | 3   | 10  | 68   |
| 2759                 | Proteobacteria;Betaproteobacteria;Burkholderiales;Comamonadaceae;Acidovorax                    | 18   | 54   | 17   | 14  | 32   | 40   | 3   | 16  | 107  |
| 2016                 | Proteobacteria;Betaproteobacteria;Burkholderiales;Comamonadaceae;Acidovorax                    | 3    | 3    | 10   | 4   | 4    | 6    | 3   | 3   | 5    |
| 3468                 | Proteobacteria;Betaproteobacteria;Burkholderiales;Comamonadaceae;Diaphorobacter                | 11   | 37   | 11   | 5   | 15   | 15   | 2   | 14  | 105  |
| 2509                 | Proteobacteria;Betaproteobacteria;Neisseriales;Neisseriaceae;Microvirgula                      | 8    | 32   | 10   | 8   | 29   | 98   | 6   | 23  | 27   |
| 2794                 | Proteobacteria;Epsilonproteobacteria;Campylobacteriales;Campylobacteriaceae;Arcobacter         | 16   | 73   | 15   | 22  | 41   | 148  | 4   | 23  | 42   |
| 446                  | Proteobacteria;Gammaproteobacteria;Aeromonadales;Aeromonadaceae;Aeromonas                      | 6    | 20   | 6    | 2   | 13   | 23   | 1   | 5   | 6    |
| 4341                 | Proteobacteria;Gammaproteobacteria;Enterobacteriales;Enterobacteriaceae                        | 1    | 21   | 6    | 5   | 15   | 21   | 1   | 1   | 5    |
| 1814                 | Proteobacteria;Gammaproteobacteria;Enterobacteriales;Enterobacteriaceae;Cedecea                | 1    | 4    | 1    | 5   | 1    | 2    | 4   | 1   | 6    |
| 3841                 | Proteobacteria;Gammaproteobacteria;Enterobacteriales;Enterobacteriaceae;Citrobacter            | 108  | 408  | 107  | 113 | 255  | 426  | 62  | 156 | 342  |
| 460                  | Proteobacteria;Gammaproteobacteria;Enterobacteriales;Enterobacteriaceae;Erwinia                | 166  | 14   | 12   | 11  | 7    | 15   | 246 | 5   | 10   |
| 3492                 | Proteobacteria;Gammaproteobacteria;Enterobacteriales;Enterobacteriaceae;Escherichia/Shigella   | 9    | 20   | 34   | 15  | 23   | 24   | 13  | 15  | 15   |
| 1488                 | Proteobacteria;Gammaproteobacteria;Enterobacteriales;Enterobacteriaceae;Klebsiella             | 12   | 46   | 15   | 15  | 39   | 53   | 6   | 25  | 43   |
| 4017                 | Proteobacteria;Gammaproteobacteria;Enterobacteriales;Enterobacteriaceae;Morganella             | 1    | 5    | 5    | 3   | 2    | 6    | 2   | 2   | 7    |
| 3907                 | Proteobacteria;Gammaproteobacteria;Enterobacteriales;Enterobacteriaceae;Pantoea                | 193  | 16   | 12   | 6   | 11   | 4    | 325 | 1   | 21   |

|      |                                                                                  |     |     |    |    |     |     |     |     |     |
|------|----------------------------------------------------------------------------------|-----|-----|----|----|-----|-----|-----|-----|-----|
| 5558 | Proteobacteria;Gammaproteobacteria;Enterobacteriales;Enterobacteriaceae;Serratia | 5   | 26  | 26 | 11 | 3   | 20  | 25  | 1   | 35  |
| 3848 | Proteobacteria;Gammaproteobacteria;Pseudomonadales;Moraxellaceae                 | 11  | 10  | 3  | 3  | 12  | 17  | 2   | 11  | 14  |
| 5154 | Proteobacteria;Gammaproteobacteria;Pseudomonadales;Moraxellaceae                 | 12  | 47  | 5  | 11 | 36  | 45  | 4   | 12  | 55  |
| 526  | Proteobacteria;Gammaproteobacteria;Pseudomonadales;Moraxellaceae;Acinetobacter   | 17  | 123 | 30 | 32 | 71  | 110 | 10  | 37  | 112 |
| 893  | Proteobacteria;Gammaproteobacteria;Pseudomonadales;Moraxellaceae;Acinetobacter   | 11  | 59  | 20 | 19 | 37  | 67  | 9   | 26  | 50  |
| 1370 | Proteobacteria;Gammaproteobacteria;Pseudomonadales;Moraxellaceae;Acinetobacter   | 16  | 102 | 21 | 20 | 55  | 64  | 2   | 34  | 99  |
| 2675 | Proteobacteria;Gammaproteobacteria;Pseudomonadales;Moraxellaceae;Acinetobacter   | 37  | 257 | 66 | 57 | 142 | 196 | 22  | 121 | 185 |
| 563  | Proteobacteria;Gammaproteobacteria;Pseudomonadales;Moraxellaceae;Acinetobacter   | 6   | 3   | 1  | 5  | 3   | 7   | 2   | 5   | 10  |
| 2828 | Proteobacteria;Gammaproteobacteria;Pseudomonadales;Moraxellaceae;Enhydrobacter   | 10  | 25  | 14 | 11 | 17  | 26  | 1   | 12  | 37  |
| 3197 | Proteobacteria;Gammaproteobacteria;Pseudomonadales;Moraxellaceae;Enhydrobacter   | 6   | 26  | 1  | 2  | 7   | 16  | 1   | 4   | 24  |
| 1192 | Proteobacteria;Gammaproteobacteria;Pseudomonadales;Moraxellaceae;Enhydrobacter   | 4   | 7   | 6  | 3  | 4   | 8   | 3   | 7   | 13  |
| 2006 | Proteobacteria;Gammaproteobacteria;Pseudomonadales;Pseudomonadaceae              | 30  | 4   | 1  | 1  | 1   | 4   | 52  | 4   | 1   |
| 1438 | Proteobacteria;Gammaproteobacteria;Pseudomonadales;Pseudomonadaceae;Pseudomonas  | 45  | 9   | 3  | 3  | 7   | 3   | 95  | 2   | 1   |
| 684  | Proteobacteria;Gammaproteobacteria;Pseudomonadales;Pseudomonadaceae;Pseudomonas  | 225 | 28  | 19 | 8  | 13  | 17  | 402 | 6   | 14  |
| 2252 | Proteobacteria;Gammaproteobacteria;Pseudomonadales;Pseudomonadaceae;Pseudomonas  | 29  | 7   | 10 | 7  | 5   | 3   | 50  | 4   | 5   |
| 1386 | unclassified Bacteria                                                            | 70  | 4   | 2  | 4  | 6   | 5   | 146 | 5   | 4   |
| 3794 | unclassified Bacteria                                                            | 9   | 16  | 2  | 9  | 26  | 21  | 4   | 16  | 35  |
| 4670 | unclassified Bacteria                                                            | 7   | 12  | 4  | 2  | 6   | 21  | 2   | 3   | 13  |

Footnotes:

1. OTUs appearing in every fish reared at low density on a fishmeal diet. Table values constitute the number of times a give OTU is observed in each sample.
2. Sequences were grouped in an OTU if they share 97% or more identity to a representative sequence
3. Taxonomy assigned if at least 90% of sequences in the OTU are in agreement for the classification

Table S8. Grain-based, high density treatment core microbiota<sup>1</sup>

| #OTU ID <sup>2</sup> | Consensus Lineage <sup>3</sup>                                                                 | 1B2 | 2B2 | 3B2  | 1B6 | 2B6  | 3B6  | 1B9 | 2B9  | 3B9  |
|----------------------|------------------------------------------------------------------------------------------------|-----|-----|------|-----|------|------|-----|------|------|
| 2949                 | Actinobacteria;Actinobacteria;Actinomycetales;Corynebacteriaceae;Corynebacterium               | 2   | 1   | 14   | 6   | 5    | 12   | 2   | 3    | 5    |
| 4311                 | Actinobacteria;Actinobacteria;Actinomycetales;Microbacteriaceae;Leifsonia                      | 12  | 1   | 15   | 7   | 4    | 11   | 3   | 6    | 1    |
| 4183                 | Actinobacteria;Actinobacteria;Actinomycetales;Propionibacteriaceae;Propionibacterium           | 3   | 8   | 10   | 3   | 5    | 12   | 3   | 4    | 7    |
| 4906                 | Bacteroidetes;Flavobacteria;Flavobacteriales;Flavobacteriaceae                                 | 2   | 3   | 7    | 3   | 4    | 8    | 4   | 1    | 1    |
| 3213                 | Bacteroidetes;Flavobacteria;Flavobacteriales;Flavobacteriaceae;Chryseobacterium                | 25  | 25  | 54   | 51  | 44   | 43   | 23  | 26   | 35   |
| 80                   | Bacteroidetes;Flavobacteria;Flavobacteriales;Flavobacteriaceae;Chryseobacterium                | 4   | 1   | 10   | 7   | 6    | 2    | 1   | 1    | 1    |
| 1695                 | Bacteroidetes;Flavobacteria;Flavobacteriales;Flavobacteriaceae;Chryseobacterium                | 1   | 4   | 2    | 1   | 4    | 7    | 2   | 1    | 2    |
| 4854                 | Bacteroidetes;Flavobacteria;Flavobacteriales;Flavobacteriaceae;Cloacibacterium                 | 15  | 9   | 33   | 21  | 27   | 32   | 15  | 16   | 77   |
| 681                  | Bacteroidetes;Sphingobacteria;Sphingobacteriales;Cytophagaceae;Flectobacillus                  | 3   | 3   | 8    | 8   | 7    | 16   | 7   | 8    | 9    |
| 763                  | Firmicutes;Bacilli;Bacillales;Bacillaceae                                                      | 18  | 4   | 11   | 6   | 10   | 14   | 3   | 7    | 11   |
| 4912                 | Firmicutes;Bacilli;Bacillales;Bacillaceae;Bacillus                                             | 21  | 8   | 20   | 8   | 10   | 37   | 8   | 5    | 20   |
| 1568                 | Firmicutes;Bacilli;Bacillales;Staphylococcaceae;Staphylococcus                                 | 20  | 4   | 17   | 7   | 17   | 21   | 8   | 14   | 21   |
| 2642                 | Firmicutes;Bacilli;Bacillales;Staphylococcaceae;Staphylococcus                                 | 15  | 6   | 19   | 4   | 10   | 9    | 5   | 2    | 17   |
| 1199                 | Firmicutes;Bacilli;Lactobacillales;Enterococcaceae;Enterococcus                                | 11  | 10  | 20   | 23  | 15   | 20   | 7   | 9    | 7    |
| 2572                 | Firmicutes;Bacilli;Lactobacillales;Enterococcaceae;Enterococcus                                | 21  | 23  | 53   | 28  | 29   | 34   | 16  | 15   | 32   |
| 3870                 | Firmicutes;Bacilli;Lactobacillales;Enterococcaceae;Enterococcus                                | 1   | 1   | 6    | 5   | 1    | 3    | 2   | 1    | 2    |
| 1802                 | Firmicutes;Bacilli;Lactobacillales;Lactobacillaceae;Lactobacillus                              | 43  | 22  | 63   | 27  | 35   | 66   | 28  | 24   | 98   |
| 1815                 | Firmicutes;Bacilli;Lactobacillales;Lactobacillaceae;Lactobacillus                              | 8   | 6   | 22   | 8   | 7    | 11   | 5   | 5    | 10   |
| 361                  | Firmicutes;Bacilli;Lactobacillales;Lactobacillaceae;Lactobacillus                              | 5   | 3   | 11   | 4   | 6    | 3    | 7   | 2    | 13   |
| 3526                 | Firmicutes;Bacilli;Lactobacillales;Lactobacillaceae;Lactobacillus                              | 3   | 2   | 4    | 2   | 3    | 12   | 1   | 1    | 2    |
| 3978                 | Firmicutes;Bacilli;Lactobacillales;Leuconostocaceae                                            | 9   | 6   | 29   | 19  | 14   | 28   | 11  | 7    | 23   |
| 1328                 | Firmicutes;Bacilli;Lactobacillales;Leuconostocaceae;Leuconostoc                                | 382 | 285 | 770  | 398 | 473  | 786  | 275 | 248  | 532  |
| 977                  | Firmicutes;Bacilli;Lactobacillales;Leuconostocaceae;Weissella                                  | 12  | 3   | 14   | 2   | 13   | 11   | 7   | 4    | 7    |
| 1372                 | Firmicutes;Bacilli;Lactobacillales;Leuconostocaceae;Weissella                                  | 58  | 71  | 163  | 88  | 95   | 145  | 71  | 51   | 107  |
| 4905                 | Firmicutes;Bacilli;Lactobacillales;Leuconostocaceae;Weissella                                  | 886 | 652 | 1774 | 961 | 1115 | 1685 | 658 | 614  | 1333 |
| 5017                 | Firmicutes;Bacilli;Lactobacillales;Leuconostocaceae;Weissella                                  | 9   | 10  | 13   | 7   | 10   | 13   | 8   | 4    | 18   |
| 384                  | Firmicutes;Bacilli;Lactobacillales;Streptococcaceae                                            | 13  | 19  | 25   | 17  | 15   | 14   | 9   | 15   | 17   |
| 277                  | Firmicutes;Bacilli;Lactobacillales;Streptococcaceae;Lactococcus                                | 12  | 5   | 13   | 5   | 7    | 21   | 4   | 2    | 11   |
| 894                  | Firmicutes;Bacilli;Lactobacillales;Streptococcaceae;Lactococcus                                | 200 | 205 | 459  | 260 | 286  | 437  | 179 | 140  | 291  |
| 1265                 | Firmicutes;Bacilli;Lactobacillales;Streptococcaceae;Lactococcus                                | 23  | 7   | 38   | 12  | 21   | 49   | 9   | 12   | 29   |
| 1404                 | Firmicutes;Bacilli;Lactobacillales;Streptococcaceae;Lactococcus                                | 82  | 89  | 211  | 107 | 90   | 178  | 75  | 69   | 125  |
| 2767                 | Firmicutes;Bacilli;Lactobacillales;Streptococcaceae;Lactococcus                                | 16  | 5   | 17   | 17  | 16   | 19   | 9   | 6    | 21   |
| 2942                 | Firmicutes;Bacilli;Lactobacillales;Streptococcaceae;Lactococcus                                | 86  | 76  | 236  | 134 | 127  | 175  | 73  | 76   | 144  |
| 3017                 | Firmicutes;Bacilli;Lactobacillales;Streptococcaceae;Lactococcus                                | 1   | 2   | 6    | 5   | 5    | 2    | 4   | 2    | 3    |
| 708                  | Firmicutes;Bacilli;Lactobacillales;Streptococcaceae;Streptococcus                              | 3   | 2   | 14   | 2   | 1    | 8    | 3   | 3    | 8    |
| 997                  | Firmicutes;Bacilli;Lactobacillales;Streptococcaceae;Streptococcus                              | 20  | 3   | 21   | 15  | 25   | 45   | 9   | 13   | 66   |
| 5231                 | Firmicutes;Bacilli;Lactobacillales;Streptococcaceae;Streptococcus                              | 105 | 137 | 213  | 105 | 155  | 230  | 94  | 81   | 186  |
| 2667                 | Firmicutes;Clostridia;Clostridiales;Lachnospiraceae                                            | 3   | 1   | 2    | 3   | 5    | 7    | 2   | 2    | 11   |
| 2533                 | Firmicutes;Clostridia;Clostridiales;Veillonellaceae;Veillonella                                | 29  | 28  | 50   | 33  | 37   | 63   | 14  | 9    | 34   |
| 3629                 | Proteobacteria;Alphaproteobacteria;Caulobacteriales;Caulobacteraceae                           | 3   | 3   | 11   | 2   | 2    | 14   | 1   | 3    | 1    |
| 649                  | Proteobacteria;Alphaproteobacteria;Rhizobiales                                                 | 7   | 3   | 5    | 4   | 9    | 9    | 2   | 1    | 7    |
| 0                    | Proteobacteria;Alphaproteobacteria;Rhizobiales;Bradyrhizobiaceae                               | 35  | 16  | 50   | 31  | 49   | 50   | 18  | 44   | 30   |
| 3190                 | Proteobacteria;Alphaproteobacteria;Rhizobiales;Bradyrhizobiaceae                               | 22  | 30  | 59   | 39  | 46   | 64   | 72  | 50   | 51   |
| 5588                 | Proteobacteria;Alphaproteobacteria;Sphingomonadales                                            | 11  | 2   | 12   | 2   | 9    | 5    | 4   | 6    | 8    |
| 2938                 | Proteobacteria;Alphaproteobacteria;Sphingomonadales;Sphingomonadaceae                          | 75  | 32  | 132  | 93  | 119  | 140  | 86  | 118  | 129  |
| 3451                 | Proteobacteria;Alphaproteobacteria;Sphingomonadales;Sphingomonadaceae;Novosphingobium          | 3   | 4   | 6    | 4   | 2    | 10   | 6   | 4    | 15   |
| 1945                 | Proteobacteria;Alphaproteobacteria;Sphingomonadales;Sphingomonadaceae;Sphingomonas             | 683 | 418 | 1777 | 882 | 1141 | 1593 | 523 | 1104 | 1113 |
| 3461                 | Proteobacteria;Alphaproteobacteria;Sphingomonadales;Sphingomonadaceae;Sphingomonas             | 25  | 11  | 50   | 30  | 37   | 47   | 13  | 38   | 43   |
| 4139                 | Proteobacteria;Alphaproteobacteria;Sphingomonadales;Sphingomonadaceae;Sphingomonas             | 14  | 5   | 21   | 17  | 40   | 35   | 16  | 18   | 22   |
| 3105                 | Proteobacteria;Betaproteobacteria;Burkholderiales;Burkholderiaceae;Burkholderia                | 80  | 4   | 17   | 11  | 8    | 39   | 3   | 6    | 11   |
| 2263                 | Proteobacteria;Betaproteobacteria;Burkholderiales;Burkholderiales_incertae_sedis;Aquabacterium | 5   | 3   | 16   | 4   | 11   | 10   | 7   | 7    | 49   |
| 1855                 | Proteobacteria;Betaproteobacteria;Burkholderiales;Comamonadaceae;Acidovorax                    | 19  | 15  | 26   | 19  | 11   | 14   | 9   | 5    | 39   |
| 2759                 | Proteobacteria;Betaproteobacteria;Burkholderiales;Comamonadaceae;Acidovorax                    | 64  | 9   | 42   | 24  | 30   | 44   | 15  | 20   | 112  |
| 2016                 | Proteobacteria;Betaproteobacteria;Burkholderiales;Comamonadaceae;Acidovorax                    | 1   | 5   | 4    | 2   | 2    | 7    | 5   | 4    | 7    |
| 4227                 | Proteobacteria;Betaproteobacteria;Burkholderiales;Comamonadaceae;Acidovorax                    | 2   | 1   | 8    | 4   | 4    | 4    | 3   | 3    | 4    |
| 5543                 | Proteobacteria;Betaproteobacteria;Burkholderiales;Comamonadaceae;Comamonas                     | 3   | 1   | 1    | 1   | 1    | 4    | 1   | 2    | 3    |
| 3468                 | Proteobacteria;Betaproteobacteria;Burkholderiales;Comamonadaceae;Diaphorobacter                | 26  | 12  | 32   | 15  | 22   | 26   | 12  | 10   | 81   |
| 2509                 | Proteobacteria;Betaproteobacteria;Neisseriales;Neisseriaceae;Microvirgula                      | 17  | 39  | 40   | 19  | 24   | 40   | 16  | 17   | 21   |
| 3896                 | Proteobacteria;Betaproteobacteria;Neisseriales;Neisseriaceae;Vogesella                         | 3   | 2   | 4    | 6   | 6    | 9    | 4   | 2    | 1    |

|      |                                                                                              |     |     |     |     |     |     |     |     |     |
|------|----------------------------------------------------------------------------------------------|-----|-----|-----|-----|-----|-----|-----|-----|-----|
| 2794 | Proteobacteria;Epsilonproteobacteria;Campylobacterales;Campylobacteraceae;Arcobacter         | 34  | 42  | 52  | 37  | 32  | 72  | 21  | 24  | 25  |
| 85   | Proteobacteria;Epsilonproteobacteria;Campylobacterales;Campylobacteraceae;Sulfurospirillum   | 2   | 1   | 12  | 6   | 3   | 12  | 4   | 1   | 3   |
| 446  | Proteobacteria;Gammaproteobacteria;Aeromonadales;Aeromonadaceae;Aeromonas                    | 12  | 8   | 27  | 10  | 13  | 20  | 12  | 5   | 15  |
| 5100 | Proteobacteria;Gammaproteobacteria;Aeromonadales;Aeromonadaceae;Aeromonas                    | 2   | 2   | 4   | 3   | 2   | 6   | 3   | 3   | 4   |
| 4341 | Proteobacteria;Gammaproteobacteria;Enterobacteriales;Enterobacteriaceae                      | 10  | 8   | 14  | 30  | 14  | 11  | 9   | 12  | 12  |
| 4497 | Proteobacteria;Gammaproteobacteria;Enterobacteriales;Enterobacteriaceae                      | 9   | 7   | 21  | 8   | 14  | 25  | 4   | 10  | 8   |
| 3841 | Proteobacteria;Gammaproteobacteria;Enterobacteriales;Enterobacteriaceae;Citrobacter          | 159 | 219 | 354 | 276 | 198 | 381 | 162 | 166 | 244 |
| 460  | Proteobacteria;Gammaproteobacteria;Enterobacteriales;Enterobacteriaceae;Erwinia              | 17  | 5   | 10  | 12  | 8   | 13  | 314 | 4   | 11  |
| 3492 | Proteobacteria;Gammaproteobacteria;Enterobacteriales;Enterobacteriaceae;Escherichia/Shigella | 14  | 8   | 27  | 15  | 14  | 16  | 28  | 13  | 14  |
| 1488 | Proteobacteria;Gammaproteobacteria;Enterobacteriales;Enterobacteriaceae;Klebsiella           | 16  | 20  | 41  | 31  | 30  | 43  | 19  | 14  | 27  |
| 3907 | Proteobacteria;Gammaproteobacteria;Enterobacteriales;Enterobacteriaceae;Pantoea              | 9   | 3   | 15  | 12  | 16  | 14  | 402 | 1   | 5   |
| 5558 | Proteobacteria;Gammaproteobacteria;Enterobacteriales;Enterobacteriaceae;Serratia             | 39  | 2   | 1   | 4   | 3   | 17  | 34  | 6   | 21  |
| 3848 | Proteobacteria;Gammaproteobacteria;Pseudomonadales;Moraxellaceae                             | 6   | 10  | 12  | 6   | 4   | 13  | 13  | 6   | 14  |
| 5154 | Proteobacteria;Gammaproteobacteria;Pseudomonadales;Moraxellaceae                             | 19  | 13  | 25  | 27  | 22  | 25  | 11  | 16  | 30  |
| 526  | Proteobacteria;Gammaproteobacteria;Pseudomonadales;Moraxellaceae;Acinetobacter               | 69  | 45  | 97  | 56  | 57  | 94  | 29  | 41  | 64  |
| 893  | Proteobacteria;Gammaproteobacteria;Pseudomonadales;Moraxellaceae;Acinetobacter               | 34  | 30  | 64  | 31  | 52  | 50  | 14  | 12  | 31  |
| 1370 | Proteobacteria;Gammaproteobacteria;Pseudomonadales;Moraxellaceae;Acinetobacter               | 19  | 24  | 63  | 46  | 37  | 67  | 28  | 22  | 47  |
| 2675 | Proteobacteria;Gammaproteobacteria;Pseudomonadales;Moraxellaceae;Acinetobacter               | 87  | 257 | 289 | 112 | 144 | 176 | 61  | 62  | 130 |
| 2828 | Proteobacteria;Gammaproteobacteria;Pseudomonadales;Moraxellaceae;Enhydrobacter               | 14  | 10  | 33  | 17  | 12  | 33  | 12  | 7   | 17  |
| 3197 | Proteobacteria;Gammaproteobacteria;Pseudomonadales;Moraxellaceae;Enhydrobacter               | 8   | 7   | 17  | 7   | 3   | 18  | 6   | 6   | 13  |
| 1192 | Proteobacteria;Gammaproteobacteria;Pseudomonadales;Moraxellaceae;Enhydrobacter               | 6   | 5   | 8   | 3   | 2   | 5   | 3   | 5   | 8   |
| 2006 | Proteobacteria;Gammaproteobacteria;Pseudomonadales;Pseudomonadaceae                          | 3   | 3   | 2   | 2   | 2   | 2   | 63  | 1   | 4   |
| 684  | Proteobacteria;Gammaproteobacteria;Pseudomonadales;Pseudomonadaceae;Pseudomonas              | 8   | 1   | 13  | 10  | 24  | 18  | 623 | 16  | 10  |
| 1614 | Proteobacteria;Gammaproteobacteria;Xanthomonadales;Xanthomonadaceae;Stenotrophomonas         | 3   | 2   | 2   | 3   | 4   | 1   | 9   | 1   | 2   |
| 922  | unclassified Bacteria                                                                        | 4   | 15  | 20  | 5   | 8   | 9   | 12  | 5   | 6   |
| 1386 | unclassified Bacteria                                                                        | 1   | 4   | 1   | 5   | 7   | 6   | 179 | 1   | 7   |
| 3794 | unclassified Bacteria                                                                        | 14  | 19  | 85  | 9   | 18  | 43  | 8   | 2   | 15  |
| 4670 | unclassified Bacteria                                                                        | 5   | 2   | 7   | 5   | 8   | 4   | 5   | 4   | 5   |

Footnotes:

1. OTUs appearing in every fish reared at high density on a soy diet. Table values constitute the number of times a give OTU is observed in each sample.
2. Sequences were grouped in an OTU if they share 97% or more identity to a representative sequence
3. Taxonomy assigned if at least 90% of sequences in the OTU are in agreement for the classification

Table S9. Grain-based, low density treatment core microbiota<sup>1</sup>

| #OTU ID <sup>2</sup> | Consensus Lineage <sup>3</sup>                                                                 | 1B11 | 2B11 | 3B11 | 1B12 | 2B12 | 3B12 | 1B7 | 2B7 | 3B7  |
|----------------------|------------------------------------------------------------------------------------------------|------|------|------|------|------|------|-----|-----|------|
| 2454                 | Actinobacteria;Actinobacteria;Actinomycetales;Nocardiaaceae;Gordonia                           | 2    | 9    | 1    | 2    | 3    | 2    | 1   | 4   | 4    |
| 3213                 | Bacteroidetes;Flavobacteria;Flavobacteriales;Flavobacteriaceae;Chryseobacterium                | 15   | 35   | 10   | 34   | 60   | 14   | 18  | 31  | 21   |
| 1695                 | Bacteroidetes;Flavobacteria;Flavobacteriales;Flavobacteriaceae;Chryseobacterium                | 2    | 4    | 5    | 3    | 15   | 1    | 4   | 4   | 5    |
| 4854                 | Bacteroidetes;Flavobacteria;Flavobacteriales;Flavobacteriaceae;Cloacibacterium                 | 16   | 230  | 4    | 17   | 56   | 3    | 26  | 16  | 23   |
| 681                  | Bacteroidetes;Sphingobacteria;Sphingobacteriales;Cytophagaceae;Flectobacillus                  | 2    | 32   | 1    | 117  | 65   | 8    | 3   | 12  | 5    |
| 763                  | Firmicutes;Bacilli;Bacillales;Bacillaceae                                                      | 6    | 14   | 3    | 12   | 26   | 6    | 3   | 7   | 23   |
| 4912                 | Firmicutes;Bacilli;Bacillales;Bacillaceae;Bacillus                                             | 4    | 13   | 2    | 7    | 21   | 5    | 1   | 43  | 18   |
| 111                  | Firmicutes;Bacilli;Bacillales;Bacillaceae;Bacillus                                             | 3    | 15   | 2    | 11   | 29   | 1    | 5   | 3   | 12   |
| 3974                 | Firmicutes;Bacilli;Bacillales;Bacillaceae;Virgibacillus                                        | 8    | 7    | 3    | 12   | 18   | 5    | 4   | 11  | 16   |
| 740                  | Firmicutes;Bacilli;Bacillales;Staphylococcaceae;Jeotgalicoccus                                 | 5    | 1    | 4    | 7    | 4    | 4    | 1   | 11  | 5    |
| 1568                 | Firmicutes;Bacilli;Bacillales;Staphylococcaceae;Staphylococcus                                 | 5    | 26   | 1    | 10   | 29   | 5    | 2   | 21  | 19   |
| 2642                 | Firmicutes;Bacilli;Bacillales;Staphylococcaceae;Staphylococcus                                 | 4    | 20   | 5    | 5    | 20   | 5    | 6   | 10  | 10   |
| 1199                 | Firmicutes;Bacilli;Lactobacillales;Enterococcaceae;Enterococcus                                | 4    | 15   | 4    | 11   | 29   | 6    | 6   | 6   | 12   |
| 2572                 | Firmicutes;Bacilli;Lactobacillales;Enterococcaceae;Enterococcus                                | 11   | 20   | 7    | 15   | 45   | 4    | 9   | 27  | 22   |
| 1802                 | Firmicutes;Bacilli;Lactobacillales;Lactobacillaceae;Lactobacillus                              | 20   | 87   | 15   | 42   | 63   | 15   | 38  | 43  | 54   |
| 1815                 | Firmicutes;Bacilli;Lactobacillales;Lactobacillaceae;Lactobacillus                              | 6    | 5    | 3    | 9    | 16   | 2    | 6   | 7   | 13   |
| 361                  | Firmicutes;Bacilli;Lactobacillales;Lactobacillaceae;Lactobacillus                              | 1    | 13   | 1    | 10   | 9    | 3    | 4   | 3   | 8    |
| 3978                 | Firmicutes;Bacilli;Lactobacillales;Leuconostocaceae                                            | 9    | 17   | 6    | 13   | 43   | 7    | 5   | 21  | 24   |
| 1328                 | Firmicutes;Bacilli;Lactobacillales;Leuconostocaceae;Leuconostoc                                | 202  | 413  | 136  | 424  | 939  | 145  | 279 | 353 | 494  |
| 1052                 | Firmicutes;Bacilli;Lactobacillales;Leuconostocaceae;Leuconostoc                                | 6    | 15   | 1    | 10   | 22   | 56   | 6   | 10  | 3    |
| 977                  | Firmicutes;Bacilli;Lactobacillales;Leuconostocaceae;Weissella                                  | 6    | 6    | 3    | 4    | 8    | 4    | 2   | 5   | 7    |
| 1372                 | Firmicutes;Bacilli;Lactobacillales;Leuconostocaceae;Weissella                                  | 41   | 95   | 28   | 114  | 212  | 29   | 64  | 73  | 82   |
| 4905                 | Firmicutes;Bacilli;Lactobacillales;Leuconostocaceae;Weissella                                  | 512  | 1065 | 281  | 1043 | 2257 | 358  | 754 | 828 | 1086 |
| 5017                 | Firmicutes;Bacilli;Lactobacillales;Leuconostocaceae;Weissella                                  | 3    | 8    | 1    | 7    | 21   | 9    | 12  | 5   | 9    |
| 1588                 | Firmicutes;Bacilli;Lactobacillales;Leuconostocaceae;Weissella                                  | 1    | 1    | 1    | 5    | 2    | 2    | 1   | 3   | 2    |
| 1138                 | Firmicutes;Bacilli;Lactobacillales;Leuconostocaceae;Weissella                                  | 1    | 8    | 1    | 7    | 13   | 1    | 5   | 3   | 5    |
| 384                  | Firmicutes;Bacilli;Lactobacillales;Streptococcaceae                                            | 9    | 14   | 7    | 13   | 32   | 5    | 5   | 6   | 14   |
| 5461                 | Firmicutes;Bacilli;Lactobacillales;Streptococcaceae                                            | 1    | 9    | 1    | 4    | 5    | 4    | 1   | 4   | 3    |
| 277                  | Firmicutes;Bacilli;Lactobacillales;Streptococcaceae;Lactococcus                                | 2    | 11   | 3    | 2    | 17   | 3    | 5   | 6   | 1    |
| 894                  | Firmicutes;Bacilli;Lactobacillales;Streptococcaceae;Lactococcus                                | 125  | 211  | 64   | 227  | 534  | 86   | 137 | 203 | 264  |
| 1265                 | Firmicutes;Bacilli;Lactobacillales;Streptococcaceae;Lactococcus                                | 6    | 16   | 8    | 31   | 46   | 10   | 15  | 25  | 33   |
| 1404                 | Firmicutes;Bacilli;Lactobacillales;Streptococcaceae;Lactococcus                                | 58   | 90   | 46   | 111  | 237  | 71   | 74  | 130 | 122  |
| 2767                 | Firmicutes;Bacilli;Lactobacillales;Streptococcaceae;Lactococcus                                | 3    | 6    | 6    | 12   | 20   | 9    | 5   | 10  | 13   |
| 2942                 | Firmicutes;Bacilli;Lactobacillales;Streptococcaceae;Lactococcus                                | 62   | 133  | 47   | 107  | 253  | 94   | 66  | 99  | 120  |
| 3017                 | Firmicutes;Bacilli;Lactobacillales;Streptococcaceae;Lactococcus                                | 2    | 5    | 1    | 5    | 5    | 2    | 3   | 5   | 4    |
| 708                  | Firmicutes;Bacilli;Lactobacillales;Streptococcaceae;Streptococcus                              | 4    | 1    | 3    | 7    | 9    | 2    | 3   | 11  | 3    |
| 997                  | Firmicutes;Bacilli;Lactobacillales;Streptococcaceae;Streptococcus                              | 10   | 29   | 7    | 15   | 27   | 7    | 20  | 22  | 33   |
| 5231                 | Firmicutes;Bacilli;Lactobacillales;Streptococcaceae;Streptococcus                              | 51   | 163  | 18   | 150  | 221  | 42   | 76  | 138 | 183  |
| 1323                 | Firmicutes;Bacilli;Lactobacillales;Streptococcaceae;Streptococcus                              | 7    | 15   | 5    | 5    | 18   | 2    | 2   | 8   | 9    |
| 2533                 | Firmicutes;Clostridia;Clostridiales;Veillonellaceae;Veillonella                                | 21   | 29   | 16   | 17   | 62   | 11   | 18  | 11  | 34   |
| 2338                 | Proteobacteria;Alphaproteobacteria;Rhizobiales                                                 | 2    | 2    | 1    | 6    | 9    | 3    | 3   | 5   | 3    |
| 0                    | Proteobacteria;Alphaproteobacteria;Rhizobiales;Bradyrhizobiaceae                               | 14   | 26   | 3    | 30   | 52   | 6    | 12  | 25  | 34   |
| 3190                 | Proteobacteria;Alphaproteobacteria;Rhizobiales;Bradyrhizobiaceae                               | 36   | 78   | 6    | 77   | 84   | 9    | 19  | 39  | 23   |
| 2938                 | Proteobacteria;Alphaproteobacteria;Sphingomonadales;Sphingomonadaceae                          | 58   | 222  | 17   | 104  | 177  | 27   | 57  | 100 | 62   |
| 1945                 | Proteobacteria;Alphaproteobacteria;Sphingomonadales;Sphingomonadaceae;Sphingomonas             | 469  | 1489 | 166  | 864  | 1755 | 214  | 484 | 931 | 940  |
| 3461                 | Proteobacteria;Alphaproteobacteria;Sphingomonadales;Sphingomonadaceae;Sphingomonas             | 13   | 43   | 7    | 24   | 55   | 8    | 18  | 35  | 43   |
| 4139                 | Proteobacteria;Alphaproteobacteria;Sphingomonadales;Sphingomonadaceae;Sphingomonas             | 9    | 44   | 5    | 12   | 33   | 12   | 13  | 19  | 23   |
| 2263                 | Proteobacteria;Betaproteobacteria;Burkholderiales;Burkholderiales_incertae_sedis;Aquabacterium | 8    | 98   | 1    | 9    | 30   | 2    | 4   | 7   | 7    |
| 1855                 | Proteobacteria;Betaproteobacteria;Burkholderiales;Comamonadaceae;Acidovorax                    | 8    | 63   | 8    | 13   | 41   | 7    | 14  | 11  | 24   |
| 2759                 | Proteobacteria;Betaproteobacteria;Burkholderiales;Comamonadaceae;Acidovorax                    | 16   | 187  | 4    | 21   | 48   | 15   | 20  | 22  | 31   |
| 3468                 | Proteobacteria;Betaproteobacteria;Burkholderiales;Comamonadaceae;Diaphorobacter                | 6    | 119  | 2    | 12   | 49   | 5    | 16  | 9   | 8    |
| 2509                 | Proteobacteria;Betaproteobacteria;Neisseriales;Neisseriaceae;Microvirgula                      | 16   | 22   | 7    | 26   | 50   | 3    | 11  | 17  | 13   |
| 2794                 | Proteobacteria;Epsilonproteobacteria;Campylobacteriales;Campylobacteriaceae;Arcobacter         | 21   | 30   | 11   | 38   | 60   | 6    | 25  | 33  | 32   |
| 446                  | Proteobacteria;Gammaproteobacteria;Aeromonadales;Aeromonadaceae;Aeromonas                      | 6    | 11   | 1    | 21   | 22   | 2    | 4   | 9   | 8    |
| 5100                 | Proteobacteria;Gammaproteobacteria;Aeromonadales;Aeromonadaceae;Aeromonas                      | 2    | 2    | 2    | 7    | 7    | 1    | 2   | 3   | 3    |
| 4341                 | Proteobacteria;Gammaproteobacteria;Enterobacteriales;Enterobacteriaceae                        | 6    | 11   | 3    | 5    | 29   | 4    | 6   | 6   | 17   |
| 4497                 | Proteobacteria;Gammaproteobacteria;Enterobacteriales;Enterobacteriaceae                        | 3    | 12   | 5    | 7    | 25   | 4    | 6   | 13  | 11   |
| 4121                 | Proteobacteria;Gammaproteobacteria;Enterobacteriales;Enterobacteriaceae                        | 5    | 2    | 3    | 2    | 12   | 2    | 4   | 9   | 3    |
| 3841                 | Proteobacteria;Gammaproteobacteria;Enterobacteriales;Enterobacteriaceae;Citrobacter            | 135  | 189  | 59   | 195  | 345  | 77   | 104 | 156 | 245  |
| 460                  | Proteobacteria;Gammaproteobacteria;Enterobacteriales;Enterobacteriaceae;Erwinia                | 11   | 42   | 1    | 10   | 24   | 6    | 13  | 7   | 7    |
| 3492                 | Proteobacteria;Gammaproteobacteria;Enterobacteriales;Enterobacteriaceae;Escherichia/Shigella   | 5    | 69   | 3    | 284  | 165  | 12   | 5   | 9   | 9    |
| 1488                 | Proteobacteria;Gammaproteobacteria;Enterobacteriales;Enterobacteriaceae;Klebsiella             | 17   | 24   | 7    | 18   | 80   | 13   | 15  | 23  | 22   |
| 3907                 | Proteobacteria;Gammaproteobacteria;Enterobacteriales;Enterobacteriaceae;Pantoea                | 18   | 60   | 2    | 15   | 27   | 15   | 8   | 10  | 15   |
| 5558                 | Proteobacteria;Gammaproteobacteria;Enterobacteriales;Enterobacteriaceae;Serratia               | 6    | 19   | 4    | 7    | 39   | 8    | 13  | 29  | 12   |
| 3848                 | Proteobacteria;Gammaproteobacteria;Pseudomonadales;Moraxellaceae                               | 4    | 11   | 2    | 11   | 18   | 4    | 5   | 12  | 8    |

|      |                                                                                 |    |     |    |    |     |    |    |    |     |
|------|---------------------------------------------------------------------------------|----|-----|----|----|-----|----|----|----|-----|
| 5154 | Proteobacteria;Gammaproteobacteria;Pseudomonadales;Moraxellaceae                | 11 | 23  | 3  | 21 | 41  | 6  | 21 | 21 | 20  |
| 526  | Proteobacteria;Gammaproteobacteria;Pseudomonadales;Moraxellaceae;Acinetobacter  | 25 | 58  | 23 | 49 | 132 | 21 | 32 | 69 | 57  |
| 893  | Proteobacteria;Gammaproteobacteria;Pseudomonadales;Moraxellaceae;Acinetobacter  | 5  | 19  | 15 | 40 | 52  | 5  | 20 | 29 | 42  |
| 1370 | Proteobacteria;Gammaproteobacteria;Pseudomonadales;Moraxellaceae;Acinetobacter  | 24 | 37  | 6  | 29 | 69  | 20 | 19 | 29 | 42  |
| 2675 | Proteobacteria;Gammaproteobacteria;Pseudomonadales;Moraxellaceae;Acinetobacter  | 63 | 117 | 48 | 84 | 210 | 39 | 98 | 90 | 138 |
| 197  | Proteobacteria;Gammaproteobacteria;Pseudomonadales;Moraxellaceae;Acinetobacter  | 5  | 5   | 2  | 4  | 8   | 1  | 2  | 5  | 3   |
| 563  | Proteobacteria;Gammaproteobacteria;Pseudomonadales;Moraxellaceae;Acinetobacter  | 2  | 4   | 2  | 8  | 10  | 1  | 4  | 2  | 2   |
| 2828 | Proteobacteria;Gammaproteobacteria;Pseudomonadales;Moraxellaceae;Enhydrobacter  | 15 | 28  | 7  | 14 | 32  | 6  | 13 | 22 | 25  |
| 3197 | Proteobacteria;Gammaproteobacteria;Pseudomonadales;Moraxellaceae;Enhydrobacter  | 6  | 5   | 2  | 8  | 26  | 1  | 2  | 7  | 13  |
| 684  | Proteobacteria;Gammaproteobacteria;Pseudomonadales;Pseudomonadaceae;Pseudomonas | 12 | 59  | 1  | 34 | 29  | 4  | 2  | 6  | 19  |

Footnotes:

1. OTUs appearing in every fish reared at low density on a soy diet. Table values constitute the number of times a give OTU is observed in each sample.
2. Sequences were grouped in an OTU if they share 97% or more identity to a representative sequence
3. Taxonomy assigned if at least 90% of sequences in the OTU are in agreement for the classification

Table S10. Fishmeal-based, high density accessory core<sup>1</sup>

| #OTU ID <sup>2</sup> | Consensus Lineage <sup>3</sup>                                                              | 1B1 | 2B1 | 3B1 | 1B4 | 2B4 | 3B4 |
|----------------------|---------------------------------------------------------------------------------------------|-----|-----|-----|-----|-----|-----|
| 4842                 | Actinobacteria;Actinobacteria;Actinomycetales;Actinomycetaceae;Actinomyces                  | 5   | 2   | 2   | 2   | 1   | 3   |
| 2949                 | Actinobacteria;Actinobacteria;Actinomycetales;Corynebacteriaceae;Corynebacterium            | 16  | 5   | 1   | 2   | 1   | 8   |
| 2074                 | Actinobacteria;Actinobacteria;Actinomycetales;Corynebacteriaceae;Corynebacterium            | 2   | 2   | 3   | 3   | 1   | 4   |
| 3338                 | Actinobacteria;Actinobacteria;Actinomycetales;Corynebacteriaceae;Corynebacterium            | 6   | 2   | 2   | 4   | 4   | 5   |
| 4906                 | Bacteroidetes;Flavobacteria;Flavobacteriales;Flavobacteriaceae                              | 7   | 3   | 2   | 1   | 1   | 1   |
| 80                   | Bacteroidetes;Flavobacteria;Flavobacteriales;Flavobacteriaceae;Chryseobacterium             | 6   | 2   | 7   | 3   | 3   | 6   |
| 111                  | Firmicutes;Bacilli;Bacillales;Bacillaceae;Bacillus                                          | 8   | 1   | 2   | 2   | 2   | 28  |
| 5230                 | Firmicutes;Bacilli;Lactobacillales;Enterococcaceae;Enterococcus                             | 4   | 13  | 3   | 3   | 5   | 11  |
| 4699                 | Firmicutes;Bacilli;Lactobacillales;Enterococcaceae;Vagococcus                               | 1   | 5   | 2   | 1   | 1   | 10  |
| 1802                 | Firmicutes;Bacilli;Lactobacillales;Lactobacillaceae;Lactobacillus                           | 6   | 6   | 8   | 5   | 4   | 10  |
| 1815                 | Firmicutes;Bacilli;Lactobacillales;Lactobacillaceae;Lactobacillus                           | 28  | 12  | 11  | 11  | 1   | 13  |
| 1052                 | Firmicutes;Bacilli;Lactobacillales;Leuconostocaceae;Leuconostoc                             | 1   | 4   | 10  | 3   | 1   | 6   |
| 1417                 | Firmicutes;Bacilli;Lactobacillales;Leuconostocaceae;Leuconostoc                             | 3   | 3   | 2   | 3   | 1   | 6   |
| 1588                 | Firmicutes;Bacilli;Lactobacillales;Leuconostocaceae;Weissella                               | 1   | 2   | 3   | 2   | 2   | 3   |
| 1138                 | Firmicutes;Bacilli;Lactobacillales;Leuconostocaceae;Weissella                               | 5   | 5   | 3   | 4   | 5   | 13  |
| 4516                 | Firmicutes;Bacilli;Lactobacillales;Streptococcaceae;Lactococcus                             | 4   | 3   | 3   | 6   | 3   | 5   |
| 1323                 | Firmicutes;Bacilli;Lactobacillales;Streptococcaceae;Streptococcus                           | 24  | 7   | 3   | 8   | 7   | 31  |
| 95                   | Firmicutes;Bacilli;Lactobacillales;Streptococcaceae;Streptococcus                           | 2   | 3   | 2   | 1   | 1   | 4   |
| 2897                 | Firmicutes;Clostridia;Clostridiales                                                         | 4   | 1   | 1   | 2   | 1   | 3   |
| 5459                 | Firmicutes;Clostridia;Clostridiales;Clostridiaceae;Clostridium                              | 1   | 2   | 4   | 2   | 2   | 11  |
| 1673                 | Firmicutes;Clostridia;Clostridiales;Incertae Sedis XI                                       | 16  | 1   | 7   | 3   | 5   | 13  |
| 781                  | Firmicutes;Clostridia;Clostridiales;Peptococcaceae;Peptococcus                              | 4   | 1   | 1   | 3   | 2   | 2   |
| 4580                 | Firmicutes;Clostridia;Clostridiales;Peptostreptococcaceae                                   | 9   | 8   | 7   | 3   | 3   | 33  |
| 3480                 | Firmicutes;Clostridia;Clostridiales;Veillonellaceae;Veillonella                             | 4   | 1   | 3   | 2   | 2   | 3   |
| 2022                 | Fusobacteria;Fusobacteria;Fusobacteriales;Fusobacteriaceae                                  | 2   | 1   | 6   | 1   | 4   | 7   |
| 1410                 | Proteobacteria;Alphaproteobacteria;Alphaproteobacteria_incertae_sedis;Novispirillum         | 2   | 2   | 3   | 3   | 8   | 4   |
| 1864                 | Proteobacteria;Alphaproteobacteria;Caulobacterales;Caulobacteraceae;Asticcacaulis           | 9   | 1   | 1   | 1   | 1   | 1   |
| 2338                 | Proteobacteria;Alphaproteobacteria;Rhizobiales                                              | 15  | 7   | 2   | 2   | 3   | 8   |
| 1316                 | Proteobacteria;Alphaproteobacteria;Sphingomonadales;Sphingomonadaceae                       | 5   | 5   | 1   | 3   | 3   | 3   |
| 1816                 | Proteobacteria;Betaproteobacteria;Burkholderiales                                           | 5   | 6   | 1   | 1   | 4   | 4   |
| 5544                 | Proteobacteria;Betaproteobacteria;Burkholderiales;Alcaligenaceae                            | 3   | 2   | 1   | 2   | 2   | 3   |
| 2016                 | Proteobacteria;Betaproteobacteria;Burkholderiales;Comamonadaceae;Acidovorax                 | 6   | 4   | 4   | 6   | 1   | 4   |
| 3903                 | Proteobacteria;Betaproteobacteria;Burkholderiales;Comamonadaceae;Comamonas                  | 5   | 1   | 3   | 2   | 3   | 13  |
| 5201                 | Proteobacteria;Betaproteobacteria;Neisseriales;Neisseriaceae;Vitreoscilla                   | 2   | 11  | 9   | 4   | 1   | 11  |
| 3896                 | Proteobacteria;Betaproteobacteria;Neisseriales;Neisseriaceae;Vogesella                      | 1   | 6   | 3   | 2   | 4   | 7   |
| 5399                 | Proteobacteria;Betaproteobacteria;Rhodocyclales;Rhodocyclaceae;Azonexus                     | 5   | 1   | 4   | 1   | 3   | 4   |
| 85                   | Proteobacteria;Epsilonproteobacteria;Campylobacteriales;Campylobacteraceae;Sulfurospirillum | 7   | 9   | 6   | 2   | 8   | 8   |
| 3236                 | Proteobacteria;Gammaproteobacteria;Aeromonadales;Aeromonadaceae;Aeromonas                   | 3   | 6   | 4   | 2   | 1   | 1   |
| 4497                 | Proteobacteria;Gammaproteobacteria;Enterobacteriales;Enterobacteriaceae                     | 22  | 26  | 12  | 10  | 11  | 16  |
| 197                  | Proteobacteria;Gammaproteobacteria;Pseudomonadales;Moraxellaceae;Acinetobacter              | 10  | 13  | 3   | 3   | 3   | 10  |
| 563                  | Proteobacteria;Gammaproteobacteria;Pseudomonadales;Moraxellaceae;Acinetobacter              | 7   | 6   | 6   | 4   | 2   | 9   |
| 1192                 | Proteobacteria;Gammaproteobacteria;Pseudomonadales;Moraxellaceae;Enhydrobacter              | 11  | 10  | 6   | 6   | 2   | 13  |
| 2252                 | Proteobacteria;Gammaproteobacteria;Pseudomonadales;Pseudomonadaceae;Pseudomonas             | 4   | 9   | 1   | 4   | 5   | 18  |
| 5089                 | Proteobacteria;Gammaproteobacteria;Pseudomonadales;Pseudomonadaceae;Pseudomonas             | 15  | 1   | 2   | 1   | 4   | 4   |
| 922                  | unclassified Bacteria                                                                       | 3   | 2   | 2   | 1   | 1   | 5   |
| 1386                 | unclassified Bacteria                                                                       | 5   | 8   | 3   | 9   | 6   | 4   |
| 3794                 | unclassified Bacteria                                                                       | 23  | 23  | 21  | 14  | 14  | 16  |
| 4670                 | unclassified Bacteria                                                                       | 14  | 11  | 3   | 1   | 8   | 21  |

Footnotes:

1. OTUs that are observed in every fish reared at high density on a fishmeal diet but not necessarily in fish raised under different diet and/or density conditions. Table values constitute the number of times a give OTU is observed in each sample.
2. Sequences were grouped in an OTU if they share 97% or more identity to a representative sequence.
3. Taxonomy assigned if at least 90% of sequences in the OTU are in agreement for the classification.

Table S11. Fishmeal-based, low density accessory core<sup>1</sup>

| #OTU ID <sup>2</sup> | Consensus Lineage <sup>3</sup>                                                        | 1B10 | 2B10 | 3B10 | 1B3 | 2B3 | 3B3 | 1B5 | 2B5 | 3B5 |
|----------------------|---------------------------------------------------------------------------------------|------|------|------|-----|-----|-----|-----|-----|-----|
| 2949                 | Actinobacteria;Actinobacteria;Actinomycetales;Corynebacteriaceae;Corynebacterium      | 4    | 5    | 3    | 3   | 11  | 14  | 2   | 1   | 20  |
| 4311                 | Actinobacteria;Actinobacteria;Actinomycetales;Microbacteriaceae;Leifsonia             | 5    | 11   | 1    | 1   | 4   | 7   | 1   | 5   | 9   |
| 111                  | Firmicutes;Bacilli;Bacillales;Bacillaceae;Bacillus                                    | 8    | 14   | 6    | 5   | 4   | 9   | 13  | 3   | 6   |
| 3526                 | Firmicutes;Bacilli;Lactobacillales;Lactobacillaceae;Lactobacillus                     | 5    | 10   | 1    | 1   | 5   | 7   | 1   | 3   | 8   |
| 1052                 | Firmicutes;Bacilli;Lactobacillales;Leuconostocaceae;Leuconostoc                       | 4    | 3    | 1    | 6   | 11  | 4   | 1   | 6   | 11  |
| 1138                 | Firmicutes;Bacilli;Lactobacillales;Leuconostocaceae;Weissella                         | 4    | 11   | 2    | 1   | 4   | 4   | 1   | 5   | 10  |
| 1323                 | Firmicutes;Bacilli;Lactobacillales;Streptococcaceae;Streptococcus                     | 2    | 7    | 6    | 6   | 14  | 18  | 1   | 7   | 30  |
| 649                  | Proteobacteria;Alphaproteobacteria;Rhizobiales                                        | 3    | 16   | 1    | 1   | 6   | 9   | 7   | 4   | 8   |
| 2338                 | Proteobacteria;Alphaproteobacteria;Rhizobiales                                        | 3    | 4    | 5    | 2   | 5   | 8   | 8   | 4   | 11  |
| 5588                 | Proteobacteria;Alphaproteobacteria;Sphingomonadales                                   | 9    | 9    | 7    | 6   | 3   | 23  | 3   | 7   | 10  |
| 2751                 | Proteobacteria;Alphaproteobacteria;Sphingomonadales;Sphingomonadaceae                 | 4    | 1    | 1    | 3   | 4   | 4   | 2   | 3   | 6   |
| 3451                 | Proteobacteria;Alphaproteobacteria;Sphingomonadales;Sphingomonadaceae;Novosphingobium | 10   | 8    | 1    | 4   | 3   | 14  | 7   | 4   | 12  |
| 3105                 | Proteobacteria;Betaproteobacteria;Burkholderiales;Burkholderiaceae;Burkholderia       | 1    | 16   | 2    | 3   | 5   | 6   | 1   | 8   | 12  |
| 2016                 | Proteobacteria;Betaproteobacteria;Burkholderiales;Comamonadaceae;Acidovorax           | 3    | 3    | 10   | 4   | 4   | 6   | 3   | 3   | 5   |
| 1814                 | Proteobacteria;Gammaproteobacteria;Enterobacteriales;Enterobacteriaceae;Cedecea       | 1    | 4    | 1    | 5   | 1   | 2   | 4   | 1   | 6   |
| 4017                 | Proteobacteria;Gammaproteobacteria;Enterobacteriales;Enterobacteriaceae;Morganella    | 1    | 5    | 5    | 3   | 2   | 6   | 2   | 2   | 7   |
| 5558                 | Proteobacteria;Gammaproteobacteria;Enterobacteriales;Enterobacteriaceae;Serratia      | 5    | 26   | 26   | 11  | 3   | 20  | 25  | 1   | 35  |
| 563                  | Proteobacteria;Gammaproteobacteria;Pseudomonadales;Moraxellaceae;Acinetobacter        | 6    | 3    | 1    | 5   | 3   | 7   | 2   | 5   | 10  |
| 1192                 | Proteobacteria;Gammaproteobacteria;Pseudomonadales;Moraxellaceae;Enhydrobacter        | 4    | 7    | 6    | 3   | 4   | 8   | 3   | 7   | 13  |
| 2006                 | Proteobacteria;Gammaproteobacteria;Pseudomonadales;Pseudomonadaceae                   | 30   | 4    | 1    | 1   | 1   | 4   | 52  | 4   | 1   |
| 1438                 | Proteobacteria;Gammaproteobacteria;Pseudomonadales;Pseudomonadaceae;Pseudomonas       | 45   | 9    | 3    | 3   | 7   | 3   | 95  | 2   | 1   |
| 2252                 | Proteobacteria;Gammaproteobacteria;Pseudomonadales;Pseudomonadaceae;Pseudomonas       | 29   | 7    | 10   | 7   | 5   | 3   | 50  | 4   | 5   |
| 1386                 | unclassified Bacteria                                                                 | 70   | 4    | 2    | 4   | 6   | 5   | 146 | 5   | 4   |
| 3794                 | unclassified Bacteria                                                                 | 9    | 16   | 2    | 9   | 26  | 21  | 4   | 16  | 35  |
| 4670                 | unclassified Bacteria                                                                 | 7    | 12   | 4    | 2   | 6   | 21  | 2   | 3   | 13  |

Footnotes:

1. OTUs that are observed in every fish reared at low density on a fishmeal diet but not necessarily in fish raised under different diet and/or density conditions. Table values constitute the number of times a give OTU is observed in each sample.
2. Sequences were grouped in an OTU if they share 97% or more identity to a representative sequence
3. Taxonomy assigned if at least 90% of sequences in the OTU are in agreement for the classification



Table S12. Grain-based, high density accessory core<sup>1</sup>

| #OTU ID <sup>2</sup> | Consensus Lineage <sup>3</sup>                                                              | 1B2 | 2B2 | 3B2 | 1B6 | 2B6 | 3B6 | 1B9 | 2B9 | 3B9 |
|----------------------|---------------------------------------------------------------------------------------------|-----|-----|-----|-----|-----|-----|-----|-----|-----|
| 2949                 | Actinobacteria;Actinobacteria;Actinomycetales;Corynebacteriaceae;Corynebacterium            | 2   | 1   | 14  | 6   | 5   | 12  | 2   | 3   | 5   |
| 4311                 | Actinobacteria;Actinobacteria;Actinomycetales;Microbacteriaceae;Leifsonia                   | 12  | 1   | 15  | 7   | 4   | 11  | 3   | 6   | 1   |
| 4183                 | Actinobacteria;Actinobacteria;Actinomycetales;Propionibacteriaceae;Propionibacterium        | 3   | 8   | 10  | 3   | 5   | 12  | 3   | 4   | 7   |
| 4906                 | Bacteroidetes;Flavobacteria;Flavobacteriales;Flavobacteriaceae                              | 2   | 3   | 7   | 3   | 4   | 8   | 4   | 1   | 1   |
| 1695                 | Bacteroidetes;Flavobacteria;Flavobacteriales;Flavobacteriaceae;Chryseobacterium             | 1   | 4   | 2   | 1   | 4   | 7   | 2   | 1   | 2   |
| 80                   | Bacteroidetes;Flavobacteria;Flavobacteriales;Flavobacteriaceae;Chryseobacterium             | 4   | 1   | 10  | 7   | 6   | 2   | 1   | 1   | 1   |
| 763                  | Firmicutes;Bacilli;Bacillales;Bacillaceae                                                   | 18  | 4   | 11  | 6   | 10  | 14  | 3   | 7   | 11  |
| 2642                 | Firmicutes;Bacilli;Bacillales;Staphylococcaceae;Staphylococcus                              | 15  | 6   | 19  | 4   | 10  | 9   | 5   | 2   | 17  |
| 3870                 | Firmicutes;Bacilli;Lactobacillales;Enterococcaceae;Enterococcus                             | 1   | 1   | 6   | 5   | 1   | 3   | 2   | 1   | 2   |
| 361                  | Firmicutes;Bacilli;Lactobacillales;Lactobacillaceae;Lactobacillus                           | 5   | 3   | 11  | 4   | 6   | 3   | 7   | 2   | 13  |
| 3526                 | Firmicutes;Bacilli;Lactobacillales;Lactobacillaceae;Lactobacillus                           | 3   | 2   | 4   | 2   | 3   | 12  | 1   | 1   | 2   |
| 1802                 | Firmicutes;Bacilli;Lactobacillales;Lactobacillaceae;Lactobacillus                           | 43  | 22  | 63  | 27  | 35  | 66  | 28  | 24  | 98  |
| 1815                 | Firmicutes;Bacilli;Lactobacillales;Lactobacillaceae;Lactobacillus                           | 8   | 6   | 22  | 8   | 7   | 11  | 5   | 5   | 10  |
| 3017                 | Firmicutes;Bacilli;Lactobacillales;Streptococcaceae;Lactococcus                             | 1   | 2   | 6   | 5   | 5   | 2   | 4   | 2   | 3   |
| 2667                 | Firmicutes;Clostridia;Clostridiales;Lachnospiraceae                                         | 3   | 1   | 2   | 3   | 5   | 7   | 2   | 2   | 11  |
| 3629                 | Proteobacteria;Alphaproteobacteria;Caulobacteriales;Caulobacteraceae                        | 3   | 3   | 11  | 2   | 2   | 14  | 1   | 3   | 1   |
| 649                  | Proteobacteria;Alphaproteobacteria;Rhizobiales                                              | 7   | 3   | 5   | 4   | 9   | 9   | 2   | 1   | 7   |
| 5588                 | Proteobacteria;Alphaproteobacteria;Sphingomonadales                                         | 11  | 2   | 12  | 2   | 9   | 5   | 4   | 6   | 8   |
| 3451                 | Proteobacteria;Alphaproteobacteria;Sphingomonadales;Sphingomonadaceae;Novosphingobium       | 3   | 4   | 6   | 4   | 2   | 10  | 6   | 4   | 15  |
| 3105                 | Proteobacteria;Betaproteobacteria;Burkholderiales;Burkholderiaceae;Burkholderia             | 80  | 4   | 17  | 11  | 8   | 39  | 3   | 6   | 11  |
| 4227                 | Proteobacteria;Betaproteobacteria;Burkholderiales;Comamonadaceae;Acidovorax                 | 2   | 1   | 8   | 4   | 4   | 4   | 3   | 3   | 4   |
| 2016                 | Proteobacteria;Betaproteobacteria;Burkholderiales;Comamonadaceae;Acidovorax                 | 1   | 5   | 4   | 2   | 2   | 7   | 5   | 4   | 7   |
| 5543                 | Proteobacteria;Betaproteobacteria;Burkholderiales;Comamonadaceae;Comamonas                  | 3   | 1   | 1   | 1   | 1   | 4   | 1   | 2   | 3   |
| 3896                 | Proteobacteria;Betaproteobacteria;Neisseriales;Neisseriaceae;Vogesella                      | 3   | 2   | 4   | 6   | 6   | 9   | 4   | 2   | 1   |
| 85                   | Proteobacteria;Epsilonproteobacteria;Campylobacteriales;Campylobacteraceae;Sulfurospirillum | 2   | 1   | 12  | 6   | 3   | 12  | 4   | 1   | 3   |
| 5100                 | Proteobacteria;Gammaproteobacteria;Aeromonadales;Aeromonadaceae;Aeromonas                   | 2   | 2   | 4   | 3   | 2   | 6   | 3   | 3   | 4   |
| 4497                 | Proteobacteria;Gammaproteobacteria;Enterobacteriales;Enterobacteriaceae                     | 9   | 7   | 21  | 8   | 14  | 25  | 4   | 10  | 8   |
| 5558                 | Proteobacteria;Gammaproteobacteria;Enterobacteriales;Enterobacteriaceae;Serratia            | 39  | 2   | 1   | 4   | 3   | 17  | 34  | 6   | 21  |
| 1192                 | Proteobacteria;Gammaproteobacteria;Pseudomonadales;Moraxellaceae;Enhydrobacter              | 6   | 5   | 8   | 3   | 2   | 5   | 3   | 5   | 8   |
| 2006                 | Proteobacteria;Gammaproteobacteria;Pseudomonadales;Pseudomonadaceae                         | 3   | 3   | 2   | 2   | 2   | 2   | 63  | 1   | 4   |
| 1614                 | Proteobacteria;Gammaproteobacteria;Xanthomonadales;Xanthomonadaceae;Stenotrophomonas        | 3   | 2   | 2   | 3   | 4   | 1   | 9   | 1   | 2   |
| 922                  | unclassified Bacteria                                                                       | 4   | 15  | 20  | 5   | 8   | 9   | 12  | 5   | 6   |
| 1386                 | unclassified Bacteria                                                                       | 1   | 4   | 1   | 5   | 7   | 6   | 179 | 1   | 7   |
| 3794                 | unclassified Bacteria                                                                       | 14  | 19  | 85  | 9   | 18  | 43  | 8   | 2   | 15  |
| 4670                 | unclassified Bacteria                                                                       | 5   | 2   | 7   | 5   | 8   | 4   | 5   | 4   | 5   |

Footnotes:

1. OTUs that are observed in every fish reared at high density on a soy diet but not necessarily in fish raised under different diet and/or density conditions. Table values constitute the number of times a give OTU is observed in each sample.
2. Sequences were grouped in an OTU if they share 97% or more identity to a representative sequence
3. Taxonomy assigned if at least 90% of sequences in the OTU are in agreement for the classification

Table S13. Grain-based, low density accessory core<sup>1</sup>

| #OTU ID <sup>2</sup> | Consensus Lineage <sup>3</sup>                                                   | 1B11 | 2B11 | 3B11 | 1B12 | 2B12 | 3B12 | 1B7 | 2B7 | 3B7 |
|----------------------|----------------------------------------------------------------------------------|------|------|------|------|------|------|-----|-----|-----|
| 2454                 | Actinobacteria;Actinobacteria;Actinomycetales;Nocardiaceae;Gordonia              | 2    | 9    | 1    | 2    | 3    | 2    | 1   | 4   | 4   |
| 1695                 | Bacteroidetes;Flavobacteria;Flavobacteriales;Flavobacteriaceae;Chryseobacterium  | 2    | 4    | 5    | 3    | 15   | 1    | 4   | 4   | 5   |
| 763                  | Firmicutes;Bacilli;Bacillales;Bacillaceae                                        | 6    | 14   | 3    | 12   | 26   | 6    | 3   | 7   | 23  |
| 111                  | Firmicutes;Bacilli;Bacillales;Bacillaceae;Bacillus                               | 3    | 15   | 2    | 11   | 29   | 1    | 5   | 3   | 12  |
| 3974                 | Firmicutes;Bacilli;Bacillales;Bacillaceae;Virgibacillus                          | 8    | 7    | 3    | 12   | 18   | 5    | 4   | 11  | 16  |
| 740                  | Firmicutes;Bacilli;Bacillales;Staphylococcaceae;Jeotgalicoccus                   | 5    | 1    | 4    | 7    | 4    | 4    | 1   | 11  | 5   |
| 2642                 | Firmicutes;Bacilli;Bacillales;Staphylococcaceae;Staphylococcus                   | 4    | 20   | 5    | 5    | 20   | 5    | 6   | 10  | 10  |
| 361                  | Firmicutes;Bacilli;Lactobacillales;Lactobacillaceae;Lactobacillus                | 1    | 13   | 1    | 10   | 9    | 3    | 4   | 3   | 8   |
| 1802                 | Firmicutes;Bacilli;Lactobacillales;Lactobacillaceae;Lactobacillus                | 20   | 87   | 15   | 42   | 63   | 15   | 38  | 43  | 54  |
| 1815                 | Firmicutes;Bacilli;Lactobacillales;Lactobacillaceae;Lactobacillus                | 6    | 5    | 3    | 9    | 16   | 2    | 6   | 7   | 13  |
| 1052                 | Firmicutes;Bacilli;Lactobacillales;Leuconostocaceae;Leuconostoc                  | 6    | 15   | 1    | 10   | 22   | 56   | 6   | 10  | 3   |
| 1588                 | Firmicutes;Bacilli;Lactobacillales;Leuconostocaceae;Weissella                    | 1    | 1    | 1    | 5    | 2    | 2    | 1   | 3   | 2   |
| 1138                 | Firmicutes;Bacilli;Lactobacillales;Leuconostocaceae;Weissella                    | 1    | 8    | 1    | 7    | 13   | 1    | 5   | 3   | 5   |
| 5461                 | Firmicutes;Bacilli;Lactobacillales;Streptococcaceae                              | 1    | 9    | 1    | 4    | 5    | 4    | 1   | 4   | 3   |
| 3017                 | Firmicutes;Bacilli;Lactobacillales;Streptococcaceae;Lactococcus                  | 2    | 5    | 1    | 5    | 5    | 2    | 3   | 5   | 4   |
| 1323                 | Firmicutes;Bacilli;Lactobacillales;Streptococcaceae;Streptococcus                | 7    | 15   | 5    | 5    | 18   | 2    | 2   | 8   | 9   |
| 2338                 | Proteobacteria;Alphaproteobacteria;Rhizobiales                                   | 2    | 2    | 1    | 6    | 9    | 3    | 3   | 5   | 3   |
| 5100                 | Proteobacteria;Gammaproteobacteria;Aeromonadales;Aeromonadaceae;Aeromonas        | 2    | 2    | 2    | 7    | 7    | 1    | 2   | 3   | 3   |
| 4121                 | Proteobacteria;Gammaproteobacteria;Enterobacteriales;Enterobacteriaceae          | 5    | 2    | 3    | 2    | 12   | 2    | 4   | 9   | 3   |
| 4497                 | Proteobacteria;Gammaproteobacteria;Enterobacteriales;Enterobacteriaceae          | 3    | 12   | 5    | 7    | 25   | 4    | 6   | 13  | 11  |
| 5558                 | Proteobacteria;Gammaproteobacteria;Enterobacteriales;Enterobacteriaceae;Serratia | 6    | 19   | 4    | 7    | 39   | 8    | 13  | 29  | 12  |
| 197                  | Proteobacteria;Gammaproteobacteria;Pseudomonadales;Moraxellaceae;Acinetobacter   | 5    | 5    | 2    | 4    | 8    | 1    | 2   | 5   | 3   |
| 563                  | Proteobacteria;Gammaproteobacteria;Pseudomonadales;Moraxellaceae;Acinetobacter   | 2    | 4    | 2    | 8    | 10   | 1    | 4   | 2   | 2   |

Footnotes:

1. OTUs that are observed in every fish reared at low density on a soy diet but not necessarily in fish raised under different diet and/or density conditions. Table values constitute the number of times a given OTU is observed in each sample.
2. Sequences were grouped in an OTU if they share 97% or more identity to a representative sequence
3. Taxonomy assigned if at least 90% of sequences in the OTU are in agreement for the classification

Table S14. LEfSe comparison of all fishmeal-based groups against all grain-based groups

| Taxon <sup>1</sup>                                                                                     | Log10 [(mean relative abundance) x (10 <sup>6</sup> )] from group with higher relative abundance of taxon | Group with significantly higher logarithmic LDA score | Logarithmic LDA score of higher-scoring group |
|--------------------------------------------------------------------------------------------------------|-----------------------------------------------------------------------------------------------------------|-------------------------------------------------------|-----------------------------------------------|
| Bacteria                                                                                               | 6                                                                                                         |                                                       |                                               |
| Bacteria.Acidobacteria                                                                                 | 0                                                                                                         |                                                       |                                               |
| Bacteria.Acidobacteria.Acidobacteria                                                                   | 0                                                                                                         |                                                       |                                               |
| Bacteria.Acidobacteria.Acidobacteria Gp1                                                               | 0                                                                                                         |                                                       |                                               |
| Bacteria.Acidobacteria.Acidobacteria Gp1.Gp1                                                           | 0                                                                                                         |                                                       |                                               |
| Bacteria.Acidobacteria.Acidobacteria Gp1.Gp1.unclassified family                                       | 0                                                                                                         |                                                       |                                               |
| Bacteria.Acidobacteria.Acidobacteria Gp1.Gp1.unclassified family.unclassified genus                    | 0                                                                                                         |                                                       |                                               |
| Bacteria.Acidobacteria.Acidobacteria Gp16                                                              | 0                                                                                                         |                                                       |                                               |
| Bacteria.Acidobacteria.Acidobacteria Gp16.Gp16                                                         | 0                                                                                                         |                                                       |                                               |
| Bacteria.Acidobacteria.Acidobacteria Gp16.Gp16.unclassified family                                     | 0                                                                                                         |                                                       |                                               |
| Bacteria.Acidobacteria.Acidobacteria Gp16.Gp16.unclassified family.unclassified genus                  | 0                                                                                                         |                                                       |                                               |
| Bacteria.Acidobacteria.Acidobacteria Gp2                                                               | 0                                                                                                         |                                                       |                                               |
| Bacteria.Acidobacteria.Acidobacteria Gp2.Gp2                                                           | 0                                                                                                         |                                                       |                                               |
| Bacteria.Acidobacteria.Acidobacteria Gp2.Gp2.unclassified family                                       | 0                                                                                                         |                                                       |                                               |
| Bacteria.Acidobacteria.Acidobacteria Gp2.Gp2.unclassified family.unclassified genus                    | 0                                                                                                         |                                                       |                                               |
| Bacteria.Acidobacteria.Acidobacteria Gp3                                                               | 0                                                                                                         |                                                       |                                               |
| Bacteria.Acidobacteria.Acidobacteria Gp3.Gp3                                                           | 0                                                                                                         |                                                       |                                               |
| Bacteria.Acidobacteria.Acidobacteria Gp3.Gp3.unclassified family                                       | 0                                                                                                         |                                                       |                                               |
| Bacteria.Acidobacteria.Acidobacteria Gp3.Gp3.unclassified family.unclassified genus                    | 0                                                                                                         |                                                       |                                               |
| Bacteria.Acidobacteria.Acidobacteria Gp4                                                               | 0                                                                                                         |                                                       |                                               |
| Bacteria.Acidobacteria.Acidobacteria Gp4.Gp4                                                           | 0                                                                                                         |                                                       |                                               |
| Bacteria.Acidobacteria.Acidobacteria Gp4.Gp4.unclassified family                                       | 0                                                                                                         |                                                       |                                               |
| Bacteria.Acidobacteria.Acidobacteria Gp4.Gp4.unclassified family.unclassified genus                    | 0                                                                                                         |                                                       |                                               |
| Bacteria.Acidobacteria.Acidobacteria Gp5                                                               | 0                                                                                                         |                                                       |                                               |
| Bacteria.Acidobacteria.Acidobacteria Gp5.Gp5                                                           | 0                                                                                                         |                                                       |                                               |
| Bacteria.Acidobacteria.Acidobacteria Gp5.Gp5.unclassified family                                       | 0                                                                                                         |                                                       |                                               |
| Bacteria.Acidobacteria.Acidobacteria Gp5.Gp5.unclassified family.unclassified genus                    | 0                                                                                                         |                                                       |                                               |
| Bacteria.Acidobacteria.Acidobacteria Gp6                                                               | 0                                                                                                         |                                                       |                                               |
| Bacteria.Acidobacteria.Acidobacteria Gp6.Gp6                                                           | 0                                                                                                         |                                                       |                                               |
| Bacteria.Acidobacteria.Acidobacteria Gp6.Gp6.unclassified family                                       | 0                                                                                                         |                                                       |                                               |
| Bacteria.Acidobacteria.Acidobacteria Gp6.Gp6.unclassified family.unclassified genus                    | 0                                                                                                         |                                                       |                                               |
| Bacteria.Acidobacteria.Acidobacteria Gp7                                                               | 0                                                                                                         |                                                       |                                               |
| Bacteria.Acidobacteria.Acidobacteria Gp7.Gp7                                                           | 0                                                                                                         |                                                       |                                               |
| Bacteria.Acidobacteria.Acidobacteria Gp7.Gp7.unclassified family                                       | 0                                                                                                         |                                                       |                                               |
| Bacteria.Acidobacteria.Acidobacteria Gp7.Gp7.unclassified family.unclassified genus                    | 0                                                                                                         |                                                       |                                               |
| Bacteria.Actinobacteria                                                                                | 3.165897344                                                                                               |                                                       |                                               |
| Bacteria.Actinobacteria.Actinobacteria                                                                 | 3.165897344                                                                                               |                                                       |                                               |
| Bacteria.Actinobacteria.Actinobacteria.Acidimicrobiales                                                | 0                                                                                                         |                                                       |                                               |
| Bacteria.Actinobacteria.Actinobacteria.Acidimicrobiales.Acidimicrobiaceae                              | 0                                                                                                         |                                                       |                                               |
| Bacteria.Actinobacteria.Actinobacteria.Acidimicrobiales.Acidimicrobiaceae.unclassified genus           | 0                                                                                                         |                                                       |                                               |
| Bacteria.Actinobacteria.Actinobacteria.Acidimicrobiales.lamiaceae                                      | 0                                                                                                         |                                                       |                                               |
| Bacteria.Actinobacteria.Actinobacteria.Acidimicrobiales.lamiaceae.lamia                                | 0                                                                                                         |                                                       |                                               |
| Bacteria.Actinobacteria.Actinobacteria.Acidimicrobiidae incertae sedis                                 | 0                                                                                                         |                                                       |                                               |
| Bacteria.Actinobacteria.Actinobacteria.Acidimicrobiidae incertae sedis.Iumatobacter                    | 0                                                                                                         |                                                       |                                               |
| Bacteria.Actinobacteria.Actinobacteria.Acidimicrobiidae incertae sedis.Iumatobacter.unclassified genus | 0                                                                                                         |                                                       |                                               |
| Bacteria.Actinobacteria.Actinobacteria.Actinomycetales                                                 | 3.165897344                                                                                               |                                                       |                                               |
| Bacteria.Actinobacteria.Actinobacteria.Actinomycetales.Actinomycetaceae                                | 0                                                                                                         |                                                       |                                               |
| Bacteria.Actinobacteria.Actinobacteria.Actinomycetales.Actinomycetaceae.Actinomycetes                  | 0                                                                                                         |                                                       |                                               |
| Bacteria.Actinobacteria.Actinobacteria.Actinomycetales.Actinomycetaceae.Arcanobacterium                | 0                                                                                                         |                                                       |                                               |
| Bacteria.Actinobacteria.Actinobacteria.Actinomycetales.Actinomycetaceae.unclassified genus             | 0                                                                                                         |                                                       |                                               |
| Bacteria.Actinobacteria.Actinobacteria.Actinomycetales.Beutenbergiaceae                                | 0                                                                                                         |                                                       |                                               |
| Bacteria.Actinobacteria.Actinobacteria.Actinomycetales.Beutenbergiaceae.Satana                         | 0                                                                                                         |                                                       |                                               |
| Bacteria.Actinobacteria.Actinobacteria.Actinomycetales.Beutenbergiaceae.Seriniabacter                  | 0                                                                                                         |                                                       |                                               |
| Bacteria.Actinobacteria.Actinobacteria.Actinomycetales.Bogoriellaceae                                  | 0                                                                                                         |                                                       |                                               |
| Bacteria.Actinobacteria.Actinobacteria.Actinomycetales.Bogoriellaceae.Georgia                          | 0                                                                                                         |                                                       |                                               |
| Bacteria.Actinobacteria.Actinobacteria.Actinomycetales.Bogoriellaceae.unclassified genus               | 0                                                                                                         |                                                       |                                               |
| Bacteria.Actinobacteria.Actinobacteria.Actinomycetales.Brevibacteriaceae                               | 0                                                                                                         |                                                       |                                               |
| Bacteria.Actinobacteria.Actinobacteria.Actinomycetales.Brevibacteriaceae.Brevibacterium                | 0                                                                                                         |                                                       |                                               |
| Bacteria.Actinobacteria.Actinobacteria.Actinomycetales.Cellulomonadaceae                               | 0                                                                                                         |                                                       |                                               |
| Bacteria.Actinobacteria.Actinobacteria.Actinomycetales.Cellulomonadaceae.Cellulomonas                  | 0                                                                                                         |                                                       |                                               |
| Bacteria.Actinobacteria.Actinobacteria.Actinomycetales.Cellulomonadaceae.unclassified genus            | 0                                                                                                         |                                                       |                                               |
| Bacteria.Actinobacteria.Actinobacteria.Actinomycetales.Corynebacteriaceae                              | 0                                                                                                         |                                                       |                                               |
| Bacteria.Actinobacteria.Actinobacteria.Actinomycetales.Corynebacteriaceae.Corynebacterium              | 0                                                                                                         |                                                       |                                               |
| Bacteria.Actinobacteria.Actinobacteria.Actinomycetales.Corynebacteriaceae.Turicella                    | 0                                                                                                         |                                                       |                                               |
| Bacteria.Actinobacteria.Actinobacteria.Actinomycetales.Corynebacteriaceae.unclassified genus           | 0                                                                                                         |                                                       |                                               |
| Bacteria.Actinobacteria.Actinobacteria.Actinomycetales.Dermabacteraceae                                | 0                                                                                                         |                                                       |                                               |
| Bacteria.Actinobacteria.Actinobacteria.Actinomycetales.Dermabacteraceae.Brachybacterium                | 0                                                                                                         |                                                       |                                               |
| Bacteria.Actinobacteria.Actinobacteria.Actinomycetales.Dermacoccaceae                                  | 0                                                                                                         |                                                       |                                               |
| Bacteria.Actinobacteria.Actinobacteria.Actinomycetales.Dermacoccaceae.Dermacoccus                      | 0                                                                                                         |                                                       |                                               |
| Bacteria.Actinobacteria.Actinobacteria.Actinomycetales.Dietziaceae                                     | 0                                                                                                         |                                                       |                                               |
| Bacteria.Actinobacteria.Actinobacteria.Actinomycetales.Dietziaceae.Dietzia                             | 0                                                                                                         |                                                       |                                               |
| Bacteria.Actinobacteria.Actinobacteria.Actinomycetales.Geodermatophilaceae                             | 0                                                                                                         |                                                       |                                               |
| Bacteria.Actinobacteria.Actinobacteria.Actinomycetales.Geodermatophilaceae.Blastococcus                | 0                                                                                                         |                                                       |                                               |
| Bacteria.Actinobacteria.Actinobacteria.Actinomycetales.Geodermatophilaceae.unclassified genus          | 0                                                                                                         |                                                       |                                               |
| Bacteria.Actinobacteria.Actinobacteria.Actinomycetales.Intrasporangiaceae                              | 0                                                                                                         |                                                       |                                               |
| Bacteria.Actinobacteria.Actinobacteria.Actinomycetales.Intrasporangiaceae.Janibacter                   | 0                                                                                                         |                                                       |                                               |
| Bacteria.Actinobacteria.Actinobacteria.Actinomycetales.Intrasporangiaceae.Knoellia                     | 0                                                                                                         |                                                       |                                               |
| Bacteria.Actinobacteria.Actinobacteria.Actinomycetales.Intrasporangiaceae.Omithinimicrobium            | 0                                                                                                         |                                                       |                                               |
| Bacteria.Actinobacteria.Actinobacteria.Actinomycetales.Intrasporangiaceae.Tetrasphaera                 | 0                                                                                                         |                                                       |                                               |
| Bacteria.Actinobacteria.Actinobacteria.Actinomycetales.Intrasporangiaceae.unclassified genus           | 0                                                                                                         |                                                       |                                               |
| Bacteria.Actinobacteria.Actinobacteria.Actinomycetales.Jonesiaceae                                     | 0                                                                                                         |                                                       |                                               |
| Bacteria.Actinobacteria.Actinobacteria.Actinomycetales.Jonesiaceae.Jonesia                             | 0                                                                                                         |                                                       |                                               |
| Bacteria.Actinobacteria.Actinobacteria.Actinomycetales.Microbacteriaceae                               | 0                                                                                                         |                                                       |                                               |
| Bacteria.Actinobacteria.Actinobacteria.Actinomycetales.Microbacteriaceae.Agrococcus                    | 0                                                                                                         |                                                       |                                               |
| Bacteria.Actinobacteria.Actinobacteria.Actinomycetales.Microbacteriaceae.Clavibacter                   | 0                                                                                                         |                                                       |                                               |
| Bacteria.Actinobacteria.Actinobacteria.Actinomycetales.Microbacteriaceae.Curtobacterium                | 0                                                                                                         |                                                       |                                               |
| Bacteria.Actinobacteria.Actinobacteria.Actinomycetales.Microbacteriaceae.Frigoribacterium              | 0                                                                                                         |                                                       |                                               |
| Bacteria.Actinobacteria.Actinobacteria.Actinomycetales.Microbacteriaceae.Leifsonia                     | 0                                                                                                         |                                                       |                                               |
| Bacteria.Actinobacteria.Actinobacteria.Actinomycetales.Microbacteriaceae.Leucobacter                   | 0                                                                                                         |                                                       |                                               |
| Bacteria.Actinobacteria.Actinobacteria.Actinomycetales.Microbacteriaceae.Microbacterium                | 0                                                                                                         |                                                       |                                               |
| Bacteria.Actinobacteria.Actinobacteria.Actinomycetales.Microbacteriaceae.Plantibacter                  | 0                                                                                                         |                                                       |                                               |
| Bacteria.Actinobacteria.Actinobacteria.Actinomycetales.Microbacteriaceae.Pseudoclavibacter             | 0                                                                                                         |                                                       |                                               |
| Bacteria.Actinobacteria.Actinobacteria.Actinomycetales.Microbacteriaceae.unclassified genus            | 0                                                                                                         |                                                       |                                               |

|                                                                                                    |             |                |             |
|----------------------------------------------------------------------------------------------------|-------------|----------------|-------------|
| Bacteria.Actinobacteria.Actinobacteria.Actinomycetales.Micrococcaceae                              | 3.165897344 |                |             |
| Bacteria.Actinobacteria.Actinobacteria.Actinomycetales.Micrococcaceae.Arthrobacter                 | 3.165897344 |                |             |
| Bacteria.Actinobacteria.Actinobacteria.Actinomycetales.Micrococcaceae.Kocuria                      | 0           |                |             |
| Bacteria.Actinobacteria.Actinobacteria.Actinomycetales.Micrococcaceae.Micrococcus                  | 0           |                |             |
| Bacteria.Actinobacteria.Actinobacteria.Actinomycetales.Micrococcaceae.Nesterenkonia                | 0           |                |             |
| Bacteria.Actinobacteria.Actinobacteria.Actinomycetales.Micrococcaceae.Rothia                       | 0           |                |             |
| Bacteria.Actinobacteria.Actinobacteria.Actinomycetales.Micrococcaceae.unclassified_genus           | 0           |                |             |
| Bacteria.Actinobacteria.Actinobacteria.Actinomycetales.Micromonosporaceae                          | 0           |                |             |
| Bacteria.Actinobacteria.Actinobacteria.Actinomycetales.Micromonosporaceae.Luedemannella            | 0           |                |             |
| Bacteria.Actinobacteria.Actinobacteria.Actinomycetales.Micromonosporaceae.Micromonospora           | 0           |                |             |
| Bacteria.Actinobacteria.Actinobacteria.Actinomycetales.Mycobacteriaceae                            | 0           |                |             |
| Bacteria.Actinobacteria.Actinobacteria.Actinomycetales.Mycobacteriaceae.Mycobacterium              | 0           |                |             |
| Bacteria.Actinobacteria.Actinobacteria.Actinomycetales.Nocardiaceae                                | 0           |                |             |
| Bacteria.Actinobacteria.Actinobacteria.Actinomycetales.Nocardiaceae.Gordonia                       | 0           |                |             |
| Bacteria.Actinobacteria.Actinobacteria.Actinomycetales.Nocardiaceae.Rhodococcus                    | 0           |                |             |
| Bacteria.Actinobacteria.Actinobacteria.Actinomycetales.Nocardiaceae.unclassified_genus             | 0           |                |             |
| Bacteria.Actinobacteria.Actinobacteria.Actinomycetales.Nocardiaceae.Williamsia                     | 0           |                |             |
| Bacteria.Actinobacteria.Actinobacteria.Actinomycetales.Nocardioidaceae                             | 0           |                |             |
| Bacteria.Actinobacteria.Actinobacteria.Actinomycetales.Nocardioidaceae.Aeromicrobium               | 0           |                |             |
| Bacteria.Actinobacteria.Actinobacteria.Actinomycetales.Nocardioidaceae.Marmoricola                 | 0           |                |             |
| Bacteria.Actinobacteria.Actinobacteria.Actinomycetales.Nocardioidaceae.Nocardioides                | 0           |                |             |
| Bacteria.Actinobacteria.Actinobacteria.Actinomycetales.Nocardioidaceae.Pimelobacter                | 0           |                |             |
| Bacteria.Actinobacteria.Actinobacteria.Actinomycetales.Nocardioidaceae.unclassified_genus          | 0           |                |             |
| Bacteria.Actinobacteria.Actinobacteria.Actinomycetales.Nocardiopsaceae                             | 0           |                |             |
| Bacteria.Actinobacteria.Actinobacteria.Actinomycetales.Nocardiopsaceae.Nocardiopsis                | 0           |                |             |
| Bacteria.Actinobacteria.Actinobacteria.Actinomycetales.Nocardiopsaceae.unclassified_genus          | 0           |                |             |
| Bacteria.Actinobacteria.Actinobacteria.Actinomycetales.Propionibacteriaceae                        | 0           |                |             |
| Bacteria.Actinobacteria.Actinobacteria.Actinomycetales.Propionibacteriaceae.Friedmanniella         | 0           |                |             |
| Bacteria.Actinobacteria.Actinobacteria.Actinomycetales.Propionibacteriaceae.Microlunatus           | 0           |                |             |
| Bacteria.Actinobacteria.Actinobacteria.Actinomycetales.Propionibacteriaceae.Propionibacterium      | 0           |                |             |
| Bacteria.Actinobacteria.Actinobacteria.Actinomycetales.Propionibacteriaceae.unclassified_genus     | 0           |                |             |
| Bacteria.Actinobacteria.Actinobacteria.Actinomycetales.Pseudonocardiaceae                          | 0           |                |             |
| Bacteria.Actinobacteria.Actinobacteria.Actinomycetales.Pseudonocardiaceae.Pseudonocardia           | 0           |                |             |
| Bacteria.Actinobacteria.Actinobacteria.Actinomycetales.Pseudonocardiaceae.Saccharopolyspora        | 0           |                |             |
| Bacteria.Actinobacteria.Actinobacteria.Actinomycetales.Pseudonocardiaceae.unclassified_genus       | 0           |                |             |
| Bacteria.Actinobacteria.Actinobacteria.Actinomycetales.Sanguibacteraceae                           | 0           |                |             |
| Bacteria.Actinobacteria.Actinobacteria.Actinomycetales.Sanguibacteraceae.Sanguibacter              | 0           |                |             |
| Bacteria.Actinobacteria.Actinobacteria.Actinomycetales.Streptomycetaceae                           | 0           |                |             |
| Bacteria.Actinobacteria.Actinobacteria.Actinomycetales.Streptomycetaceae.Streptomyces              | 0           |                |             |
| Bacteria.Actinobacteria.Actinobacteria.Actinomycetales.Streptomycetaceae.unclassified_genus        | 0           |                |             |
| Bacteria.Actinobacteria.Actinobacteria.Actinomycetales.unclassified_family                         | 0           |                |             |
| Bacteria.Actinobacteria.Actinobacteria.Actinomycetales.unclassified_family.unclassified_genus      | 0           |                |             |
| Bacteria.Actinobacteria.Actinobacteria.Actinomycetales.Yaniellaceae                                | 0           |                |             |
| Bacteria.Actinobacteria.Actinobacteria.Actinomycetales.Yaniellaceae.Yaniella                       | 0           |                |             |
| Bacteria.Actinobacteria.Actinobacteria.Bifidobacteriales                                           | 0           |                |             |
| Bacteria.Actinobacteria.Actinobacteria.Bifidobacteriales.Bifidobacteriaceae                        | 0           |                |             |
| Bacteria.Actinobacteria.Actinobacteria.Bifidobacteriales.Bifidobacteriaceae.Aeriscardovia          | 0           |                |             |
| Bacteria.Actinobacteria.Actinobacteria.Bifidobacteriales.Bifidobacteriaceae.Bifidobacterium        | 0           |                |             |
| Bacteria.Actinobacteria.Actinobacteria.Bifidobacteriales.Bifidobacteriaceae.unclassified_genus     | 0           |                |             |
| Bacteria.Actinobacteria.Actinobacteria.Coriobacteriales                                            | 0           |                |             |
| Bacteria.Actinobacteria.Actinobacteria.Coriobacteriales.Coriobacteriaceae                          | 0           |                |             |
| Bacteria.Actinobacteria.Actinobacteria.Coriobacteriales.Coriobacteriaceae.Asaccharobacter          | 0           |                |             |
| Bacteria.Actinobacteria.Actinobacteria.Coriobacteriales.Coriobacteriaceae.Atopobium                | 0           |                |             |
| Bacteria.Actinobacteria.Actinobacteria.Coriobacteriales.Coriobacteriaceae.Collinsella              | 0           |                |             |
| Bacteria.Actinobacteria.Actinobacteria.Coriobacteriales.Coriobacteriaceae.Eggerthella              | 0           |                |             |
| Bacteria.Actinobacteria.Actinobacteria.Coriobacteriales.Coriobacteriaceae.Olsenella                | 0           |                |             |
| Bacteria.Actinobacteria.Actinobacteria.Coriobacteriales.Coriobacteriaceae.Paraeggerthella          | 0           |                |             |
| Bacteria.Actinobacteria.Actinobacteria.Coriobacteriales.Coriobacteriaceae.unclassified_genus       | 0           |                |             |
| Bacteria.Actinobacteria.Actinobacteria.Rubrobacteriales                                            | 0           |                |             |
| Bacteria.Actinobacteria.Actinobacteria.Rubrobacteriales.Rubrobacteraceae                           | 0           |                |             |
| Bacteria.Actinobacteria.Actinobacteria.Rubrobacteriales.Rubrobacteraceae.Rubrobacter               | 0           |                |             |
| Bacteria.Actinobacteria.Actinobacteria.Solirubrobacteriales                                        | 0           |                |             |
| Bacteria.Actinobacteria.Actinobacteria.Solirubrobacteriales.Conexibacteraceae                      | 0           |                |             |
| Bacteria.Actinobacteria.Actinobacteria.Solirubrobacteriales.Conexibacteraceae.Conexibacter         | 0           |                |             |
| Bacteria.Actinobacteria.Actinobacteria.Solirubrobacteriales.Solirubrobacteraceae                   | 0           |                |             |
| Bacteria.Actinobacteria.Actinobacteria.Solirubrobacteriales.Solirubrobacteraceae.Solirubrobacter   | 0           |                |             |
| Bacteria.Actinobacteria.Actinobacteria.Solirubrobacteriales.unclassified_family                    | 0           |                |             |
| Bacteria.Actinobacteria.Actinobacteria.Solirubrobacteriales.unclassified_family.unclassified_genus | 0           |                |             |
| Bacteria.Actinobacteria.Actinobacteria.unclassified_order                                          | 0           |                |             |
| Bacteria.Actinobacteria.Actinobacteria.unclassified_order.unclassified_family                      | 0           |                |             |
| Bacteria.Actinobacteria.Actinobacteria.unclassified_order.unclassified_family.unclassified_genus   | 0           |                |             |
| Bacteria.Aquificae                                                                                 | 0           |                |             |
| Bacteria.Aquificae.Aquificae                                                                       | 0           |                |             |
| Bacteria.Aquificae.Aquificae.Aquificales                                                           | 0           |                |             |
| Bacteria.Aquificae.Aquificae.Aquificales.Hydrogenothermaceae                                       | 0           |                |             |
| Bacteria.Aquificae.Aquificae.Aquificales.Hydrogenothermaceae.Sulfurihydrogenibium                  | 0           |                |             |
| Bacteria.Bacteroidetes                                                                             | 4.314707167 |                |             |
| Bacteria.Bacteroidetes.Bacteroidia                                                                 | 3.168303414 |                |             |
| Bacteria.Bacteroidetes.Bacteroidia.Bacteroidales                                                   | 3.168303414 |                |             |
| Bacteria.Bacteroidetes.Bacteroidia.Bacteroidales.Bacteroidaceae                                    | 2.780939668 |                |             |
| Bacteria.Bacteroidetes.Bacteroidia.Bacteroidales.Bacteroidaceae.Bacteroides                        | 2.780939668 |                |             |
| Bacteria.Bacteroidetes.Bacteroidia.Bacteroidales.Porphyrionadaceae                                 | 3.168303414 |                |             |
| Bacteria.Bacteroidetes.Bacteroidia.Bacteroidales.Porphyrionadaceae.Dysgonomonas                    | 0           |                |             |
| Bacteria.Bacteroidetes.Bacteroidia.Bacteroidales.Porphyrionadaceae.Porphyrionomonas                | 0           |                |             |
| Bacteria.Bacteroidetes.Bacteroidia.Bacteroidales.Porphyrionadaceae.Proteiniphilum                  | 0           |                |             |
| Bacteria.Bacteroidetes.Bacteroidia.Bacteroidales.Porphyrionadaceae.unclassified_genus              | 3.168303414 |                |             |
| Bacteria.Bacteroidetes.Bacteroidia.Bacteroidales.Prevotellaceae                                    | 0           |                |             |
| Bacteria.Bacteroidetes.Bacteroidia.Bacteroidales.Prevotellaceae.Hallella                           | 0           |                |             |
| Bacteria.Bacteroidetes.Bacteroidia.Bacteroidales.Prevotellaceae.Prevotella                         | 0           |                |             |
| Bacteria.Bacteroidetes.Bacteroidia.Bacteroidales.Prevotellaceae.unclassified_genus                 | 0           |                |             |
| Bacteria.Bacteroidetes.Bacteroidia.Bacteroidales.unclassified_family                               | 0           |                |             |
| Bacteria.Bacteroidetes.Bacteroidia.Bacteroidales.unclassified_family.unclassified_genus            | 0           |                |             |
| Bacteria.Bacteroidetes.Flavobacteria                                                               | 4.209824075 |                |             |
| Bacteria.Bacteroidetes.Flavobacteria.Flavobacteriales                                              | 4.209824075 |                |             |
| Bacteria.Bacteroidetes.Flavobacteria.Flavobacteriales.Cryomorphaceae                               | 0           |                |             |
| Bacteria.Bacteroidetes.Flavobacteria.Flavobacteriales.Cryomorphaceae.Fluvicola                     | 0           |                |             |
| Bacteria.Bacteroidetes.Flavobacteria.Flavobacteriales.Flavobacteriaceae                            | 4.209824075 |                |             |
| Bacteria.Bacteroidetes.Flavobacteria.Flavobacteriales.Flavobacteriaceae.Capnocytophaga             | 0           |                |             |
| Bacteria.Bacteroidetes.Flavobacteria.Flavobacteriales.Flavobacteriaceae.Chryseobacterium           | 4.070348208 | Fishmeal-based | 3.142706388 |
| Bacteria.Bacteroidetes.Flavobacteria.Flavobacteriales.Flavobacteriaceae.Cloacibacterium            | 3.675880431 |                |             |
| Bacteria.Bacteroidetes.Flavobacteria.Flavobacteriales.Flavobacteriaceae.Flavobacterium             | 2.864867349 |                |             |
| Bacteria.Bacteroidetes.Flavobacteria.Flavobacteriales.Flavobacteriaceae.Myroides                   | 0           |                |             |

|                                                                                                     |             |  |
|-----------------------------------------------------------------------------------------------------|-------------|--|
| Bacteria.Bacteroidetes.Flavobacteria.Flavobacteriales.Flavobacteriaceae.Riemerella                  | 0           |  |
| Bacteria.Bacteroidetes.Flavobacteria.Flavobacteriales.Flavobacteriaceae.Salinimicrobium             | 0           |  |
| Bacteria.Bacteroidetes.Flavobacteria.Flavobacteriales.Flavobacteriaceae.unclassified_genus          | 0           |  |
| Bacteria.Bacteroidetes.Flavobacteria.Flavobacteriales.Flavobacteriaceae.Wautersiella                | 0           |  |
| Bacteria.Bacteroidetes.Flavobacteria.Flavobacteriales.unclassified_family                           | 0           |  |
| Bacteria.Bacteroidetes.Flavobacteria.Flavobacteriales.unclassified_family.unclassified_genus        | 0           |  |
| Bacteria.Bacteroidetes.Sphingobacteria                                                              | 3,47739161  |  |
| Bacteria.Bacteroidetes.Sphingobacteria.Sphingobacteriales                                           | 3,47739161  |  |
| Bacteria.Bacteroidetes.Sphingobacteria.Sphingobacteriales.Chitinophagaceae                          | 0           |  |
| Bacteria.Bacteroidetes.Sphingobacteria.Sphingobacteriales.Chitinophagaceae.Ferruginibacter          | 0           |  |
| Bacteria.Bacteroidetes.Sphingobacteria.Sphingobacteriales.Chitinophagaceae.Filimonas                | 0           |  |
| Bacteria.Bacteroidetes.Sphingobacteria.Sphingobacteriales.Chitinophagaceae.Flavisolibacter          | 0           |  |
| Bacteria.Bacteroidetes.Sphingobacteria.Sphingobacteriales.Chitinophagaceae.unclassified_genus       | 0           |  |
| Bacteria.Bacteroidetes.Sphingobacteria.Sphingobacteriales.Cytophagaceae                             | 3,374850036 |  |
| Bacteria.Bacteroidetes.Sphingobacteria.Sphingobacteriales.Cytophagaceae.Adhaeribacter               | 0           |  |
| Bacteria.Bacteroidetes.Sphingobacteria.Sphingobacteriales.Cytophagaceae.Cytophaga                   | 0           |  |
| Bacteria.Bacteroidetes.Sphingobacteria.Sphingobacteriales.Cytophagaceae.Dvadobacter                 | 0           |  |
| Bacteria.Bacteroidetes.Sphingobacteria.Sphingobacteriales.Cytophagaceae.Ermicicia                   | 0           |  |
| Bacteria.Bacteroidetes.Sphingobacteria.Sphingobacteriales.Cytophagaceae.Flectobacillus              | 3,374850036 |  |
| Bacteria.Bacteroidetes.Sphingobacteria.Sphingobacteriales.Cytophagaceae.Hymenobacter                | 0           |  |
| Bacteria.Bacteroidetes.Sphingobacteria.Sphingobacteriales.Cytophagaceae.Pontibacter                 | 0           |  |
| Bacteria.Bacteroidetes.Sphingobacteria.Sphingobacteriales.Cytophagaceae.Runella                     | 0           |  |
| Bacteria.Bacteroidetes.Sphingobacteria.Sphingobacteriales.Cytophagaceae.Sporocytophaga              | 0           |  |
| Bacteria.Bacteroidetes.Sphingobacteria.Sphingobacteriales.Cytophagaceae.unclassified_genus          | 0           |  |
| Bacteria.Bacteroidetes.Sphingobacteria.Sphingobacteriales.Sphingobacteriaceae                       | 3,34359413  |  |
| Bacteria.Bacteroidetes.Sphingobacteria.Sphingobacteriales.Sphingobacteriaceae.Nubsella              | 0           |  |
| Bacteria.Bacteroidetes.Sphingobacteria.Sphingobacteriales.Sphingobacteriaceae.Pedobacter            | 0           |  |
| Bacteria.Bacteroidetes.Sphingobacteria.Sphingobacteriales.Sphingobacteriaceae.Sphingobacterium      | 3,34359413  |  |
| Bacteria.Bacteroidetes.Sphingobacteria.Sphingobacteriales.Sphingobacteriaceae.unclassified_genus    | 0           |  |
| Bacteria.Bacteroidetes.Sphingobacteria.Sphingobacteriales.unclassified_family                       | 0           |  |
| Bacteria.Bacteroidetes.Sphingobacteria.Sphingobacteriales.unclassified_family.unclassified_genus    | 0           |  |
| Bacteria.Bacteroidetes.unclassified_class                                                           | 0           |  |
| Bacteria.Bacteroidetes.unclassified_class.unclassified_order                                        | 0           |  |
| Bacteria.Bacteroidetes.unclassified_class.unclassified_order.unclassified_family                    | 0           |  |
| Bacteria.Bacteroidetes.unclassified_class.unclassified_order.unclassified_family.unclassified_genus | 0           |  |
| Bacteria.Chloroflexi                                                                                | 0           |  |
| Bacteria.Chloroflexi.Anaerolineae                                                                   | 0           |  |
| Bacteria.Chloroflexi.Anaerolineae.Anaerolineales                                                    | 0           |  |
| Bacteria.Chloroflexi.Anaerolineae.Anaerolineales.Anaerolineaceae                                    | 0           |  |
| Bacteria.Chloroflexi.Anaerolineae.Anaerolineales.Anaerolineaceae.unclassified_genus                 | 0           |  |
| Bacteria.Chloroflexi.Caldilineae                                                                    | 0           |  |
| Bacteria.Chloroflexi.Caldilineae.Caldilineales                                                      | 0           |  |
| Bacteria.Chloroflexi.Caldilineae.Caldilineales.Caldilineaceae                                       | 0           |  |
| Bacteria.Chloroflexi.Caldilineae.Caldilineales.Caldilineaceae.Caldilinea                            | 0           |  |
| Bacteria.Chloroflexi.Thermomicrobia                                                                 | 0           |  |
| Bacteria.Chloroflexi.Thermomicrobia.Sphaerobacterales                                               | 0           |  |
| Bacteria.Chloroflexi.Thermomicrobia.Sphaerobacterales.Sphaerobacteraceae                            | 0           |  |
| Bacteria.Chloroflexi.Thermomicrobia.Sphaerobacterales.Sphaerobacteraceae.Sphaerobacter              | 0           |  |
| Bacteria.Chloroflexi.Thermomicrobia.unclassified_order                                              | 0           |  |
| Bacteria.Chloroflexi.Thermomicrobia.unclassified_order.unclassified_family                          | 0           |  |
| Bacteria.Chloroflexi.Thermomicrobia.unclassified_order.unclassified_family.unclassified_genus       | 0           |  |
| Bacteria.Chloroflexi.unclassified_class                                                             | 0           |  |
| Bacteria.Chloroflexi.unclassified_class.unclassified_order                                          | 0           |  |
| Bacteria.Chloroflexi.unclassified_class.unclassified_order.unclassified_family                      | 0           |  |
| Bacteria.Chloroflexi.unclassified_class.unclassified_order.unclassified_family.unclassified_genus   | 0           |  |
| Bacteria.Deinococcus_Thermus                                                                        | 0           |  |
| Bacteria.Deinococcus_Thermus.Deinococci                                                             | 0           |  |
| Bacteria.Deinococcus_Thermus.Deinococci_Deinococcales                                               | 0           |  |
| Bacteria.Deinococcus_Thermus.Deinococci_Deinococcales_Deinococcaceae                                | 0           |  |
| Bacteria.Deinococcus_Thermus.Deinococci_Deinococcales_Deinococcaceae_Deinococcus                    | 0           |  |
| Bacteria.Deinococcus_Thermus.Deinococci_Deinococcales_Trueperaceae                                  | 0           |  |
| Bacteria.Deinococcus_Thermus.Deinococci_Deinococcales_Trueperaceae_Truepera                         | 0           |  |
| Bacteria.Deinococcus_Thermus.Deinococci_Thermales                                                   | 0           |  |
| Bacteria.Deinococcus_Thermus.Deinococci_Thermales_Thermaceae                                        | 0           |  |
| Bacteria.Deinococcus_Thermus.Deinococci_Thermales_Thermaceae_Meiothermus                            | 0           |  |
| Bacteria.Deinococcus_Thermus.Deinococci.unclassified_order                                          | 0           |  |
| Bacteria.Deinococcus_Thermus.Deinococci.unclassified_order.unclassified_family                      | 0           |  |
| Bacteria.Deinococcus_Thermus.Deinococci.unclassified_order.unclassified_family.unclassified_genus   | 0           |  |
| Bacteria.Firmicutes                                                                                 | 5,72503841  |  |
| Bacteria.Firmicutes.Bacilli                                                                         | 5,716129382 |  |
| Bacteria.Firmicutes.Bacilli.Bacillales                                                              | 4,159959177 |  |
| Bacteria.Firmicutes.Bacilli.Bacillales.Alicyclobacillaceae                                          | 0           |  |
| Bacteria.Firmicutes.Bacilli.Bacillales.Alicyclobacillaceae.Alicyclobacillus                         | 0           |  |
| Bacteria.Firmicutes.Bacilli.Bacillales.Bacillaceae                                                  | 4,011315507 |  |
| Bacteria.Firmicutes.Bacilli.Bacillales.Bacillaceae.Anoxybacillus                                    | 0           |  |
| Bacteria.Firmicutes.Bacilli.Bacillales.Bacillaceae.Bacillus                                         | 3,89476401  |  |
| Bacteria.Firmicutes.Bacilli.Bacillales.Bacillaceae.Caldalkalibacillus                               | 0           |  |
| Bacteria.Firmicutes.Bacilli.Bacillales.Bacillaceae.Cerasibacillus                                   | 0           |  |
| Bacteria.Firmicutes.Bacilli.Bacillales.Bacillaceae.Exiguobacterium                                  | 2,864867349 |  |
| Bacteria.Firmicutes.Bacilli.Bacillales.Bacillaceae.Geobacillus                                      | 0           |  |
| Bacteria.Firmicutes.Bacilli.Bacillales.Bacillaceae.Gracilibacillus                                  | 0           |  |
| Bacteria.Firmicutes.Bacilli.Bacillales.Bacillaceae.Lentibacillus                                    | 0           |  |
| Bacteria.Firmicutes.Bacilli.Bacillales.Bacillaceae.Lysinibacillus                                   | 0           |  |
| Bacteria.Firmicutes.Bacilli.Bacillales.Bacillaceae.Oceanobacillus                                   | 0           |  |
| Bacteria.Firmicutes.Bacilli.Bacillales.Bacillaceae.Ornithinibacillus                                | 0           |  |
| Bacteria.Firmicutes.Bacilli.Bacillales.Bacillaceae.Tenuibacillus                                    | 0           |  |
| Bacteria.Firmicutes.Bacilli.Bacillales.Bacillaceae.Terribacillus                                    | 0           |  |
| Bacteria.Firmicutes.Bacilli.Bacillales.Bacillaceae.Tumebacillus                                     | 0           |  |
| Bacteria.Firmicutes.Bacilli.Bacillales.Bacillaceae.unclassified_genus                               | 3,383075809 |  |
| Bacteria.Firmicutes.Bacilli.Bacillales.Bacillaceae.Ureibacillus                                     | 0           |  |
| Bacteria.Firmicutes.Bacilli.Bacillales.Bacillaceae.Virgibacillus                                    | 0           |  |
| Bacteria.Firmicutes.Bacilli.Bacillales.Bacillales_incertae_sedis                                    | 0           |  |
| Bacteria.Firmicutes.Bacilli.Bacillales.Bacillales_incertae_sedis.Rummeliibacillus                   | 0           |  |
| Bacteria.Firmicutes.Bacilli.Bacillales.Bacillales_incertae_sedis.Solibacillus                       | 0           |  |
| Bacteria.Firmicutes.Bacilli.Bacillales.Listeriaceae                                                 | 0           |  |
| Bacteria.Firmicutes.Bacilli.Bacillales.Listeriaceae.Brochothrix                                     | 0           |  |
| Bacteria.Firmicutes.Bacilli.Bacillales.Listeriaceae.Listeria                                        | 0           |  |
| Bacteria.Firmicutes.Bacilli.Bacillales.Paenibacillaceae                                             | 0           |  |
| Bacteria.Firmicutes.Bacilli.Bacillales.Paenibacillaceae.Ammoniphilus                                | 0           |  |
| Bacteria.Firmicutes.Bacilli.Bacillales.Paenibacillaceae.Aneurinibacillus                            | 0           |  |
| Bacteria.Firmicutes.Bacilli.Bacillales.Paenibacillaceae.Brevibacillus                               | 0           |  |
| Bacteria.Firmicutes.Bacilli.Bacillales.Paenibacillaceae.Cohnella                                    | 0           |  |
| Bacteria.Firmicutes.Bacilli.Bacillales.Paenibacillaceae.Oxalophagus                                 | 0           |  |

|                                                                                       |             |                |             |
|---------------------------------------------------------------------------------------|-------------|----------------|-------------|
| Bacteria.Firmicutes.Bacilli.Bacillales.Paenibacillaceae.Paenibacillus                 | 0           |                |             |
| Bacteria.Firmicutes.Bacilli.Bacillales.Paenibacillaceae.Saccharibacillus              | 0           |                |             |
| Bacteria.Firmicutes.Bacilli.Bacillales.Paenibacillaceae.unclassified_genus            | 0           |                |             |
| Bacteria.Firmicutes.Bacilli.Bacillales.Planococcaceae                                 | 0           |                |             |
| Bacteria.Firmicutes.Bacilli.Bacillales.Planococcaceae.Bhargavaea                      | 0           |                |             |
| Bacteria.Firmicutes.Bacilli.Bacillales.Planococcaceae.Kurthia                         | 0           |                |             |
| Bacteria.Firmicutes.Bacilli.Bacillales.Planococcaceae.Planococcus                     | 0           |                |             |
| Bacteria.Firmicutes.Bacilli.Bacillales.Planococcaceae.Planomicrobium                  | 0           |                |             |
| Bacteria.Firmicutes.Bacilli.Bacillales.Planococcaceae.Sporosarcina                    | 0           |                |             |
| Bacteria.Firmicutes.Bacilli.Bacillales.Planococcaceae.unclassified_genus              | 0           |                |             |
| Bacteria.Firmicutes.Bacilli.Bacillales.Staphylococcaceae                              | 3.622117197 |                |             |
| Bacteria.Firmicutes.Bacilli.Bacillales.Staphylococcaceae.Gemella                      | 0           |                |             |
| Bacteria.Firmicutes.Bacilli.Bacillales.Staphylococcaceae.Jeotgaliococcus              | 0           |                |             |
| Bacteria.Firmicutes.Bacilli.Bacillales.Staphylococcaceae.Macrocooccus                 | 0           |                |             |
| Bacteria.Firmicutes.Bacilli.Bacillales.Staphylococcaceae.Nosocomiocooccus             | 0           |                |             |
| Bacteria.Firmicutes.Bacilli.Bacillales.Staphylococcaceae.Saliniocooccus               | 0           |                |             |
| Bacteria.Firmicutes.Bacilli.Bacillales.Staphylococcaceae.Staphylococcus               | 3.622117197 |                |             |
| Bacteria.Firmicutes.Bacilli.Bacillales.Thermoactinomycetaceae                         | 0           |                |             |
| Bacteria.Firmicutes.Bacilli.Bacillales.Thermoactinomycetaceae.Thermoactinomycetes     | 0           |                |             |
| Bacteria.Firmicutes.Bacilli.Bacillales.Thermoactinomycetaceae.unclassified_genus      | 0           |                |             |
| Bacteria.Firmicutes.Bacilli.Bacillales.unclassified_family                            | 0           |                |             |
| Bacteria.Firmicutes.Bacilli.Bacillales.unclassified_family.unclassified_genus         | 0           |                |             |
| Bacteria.Firmicutes.Bacilli.Lactobacillales                                           | 5.703891145 |                |             |
| Bacteria.Firmicutes.Bacilli.Lactobacillales.Aerococcaceae                             | 0           |                |             |
| Bacteria.Firmicutes.Bacilli.Lactobacillales.Aerococcaceae.Abiotrophia                 | 0           |                |             |
| Bacteria.Firmicutes.Bacilli.Lactobacillales.Aerococcaceae.Aerococcus                  | 0           |                |             |
| Bacteria.Firmicutes.Bacilli.Lactobacillales.Aerococcaceae.Eremococcus                 | 0           |                |             |
| Bacteria.Firmicutes.Bacilli.Lactobacillales.Aerococcaceae.Globicatella                | 0           |                |             |
| Bacteria.Firmicutes.Bacilli.Lactobacillales.Carnobacteriaceae                         | 4.47136814  |                |             |
| Bacteria.Firmicutes.Bacilli.Lactobacillales.Carnobacteriaceae.Atopostipes             | 0           |                |             |
| Bacteria.Firmicutes.Bacilli.Lactobacillales.Carnobacteriaceae.Carnobacterium          | 4.47136814  |                |             |
| Bacteria.Firmicutes.Bacilli.Lactobacillales.Carnobacteriaceae.Desemzia                | 0           |                |             |
| Bacteria.Firmicutes.Bacilli.Lactobacillales.Carnobacteriaceae.Granulicatella          | 0           |                |             |
| Bacteria.Firmicutes.Bacilli.Lactobacillales.Carnobacteriaceae.Marinilactibacillus     | 0           |                |             |
| Bacteria.Firmicutes.Bacilli.Lactobacillales.Carnobacteriaceae.Trichococcus            | 0           |                |             |
| Bacteria.Firmicutes.Bacilli.Lactobacillales.Carnobacteriaceae.unclassified_genus      | 0           |                |             |
| Bacteria.Firmicutes.Bacilli.Lactobacillales.Enterococcaceae                           | 4.034535215 |                |             |
| Bacteria.Firmicutes.Bacilli.Lactobacillales.Enterococcaceae.Enterococcus              | 4.034535215 |                |             |
| Bacteria.Firmicutes.Bacilli.Lactobacillales.Enterococcaceae.unclassified_genus        | 0           |                |             |
| Bacteria.Firmicutes.Bacilli.Lactobacillales.Enterococcaceae.Vagococcus                | 0           |                |             |
| Bacteria.Firmicutes.Bacilli.Lactobacillales.Lactobacillaceae                          | 4.140344892 | Grain-based    | 3.920888601 |
| Bacteria.Firmicutes.Bacilli.Lactobacillales.Lactobacillaceae.Lactobacillus            | 4.140344892 | Grain-based    | 3.914081554 |
| Bacteria.Firmicutes.Bacilli.Lactobacillales.Lactobacillaceae.Pediococcus              | 0           |                |             |
| Bacteria.Firmicutes.Bacilli.Lactobacillales.Lactobacillaceae.unclassified_genus       | 0           |                |             |
| Bacteria.Firmicutes.Bacilli.Lactobacillales.Leuconostocaceae                          | 5.520299293 |                |             |
| Bacteria.Firmicutes.Bacilli.Lactobacillales.Leuconostocaceae.Leuconostoc              | 5.025245096 |                |             |
| Bacteria.Firmicutes.Bacilli.Lactobacillales.Leuconostocaceae.unclassified_genus       | 3.340552621 |                |             |
| Bacteria.Firmicutes.Bacilli.Lactobacillales.Leuconostocaceae.Weissella                | 5.367599599 | Fishmeal-based | 4.037726214 |
| Bacteria.Firmicutes.Bacilli.Lactobacillales.Streptococcaceae                          | 5.17349219  | Grain-based    | 3.947605787 |
| Bacteria.Firmicutes.Bacilli.Lactobacillales.Streptococcaceae.Lactococcus              | 5.048149257 |                |             |
| Bacteria.Firmicutes.Bacilli.Lactobacillales.Streptococcaceae.Streptococcus            | 4.571559816 | Grain-based    | 3.998238502 |
| Bacteria.Firmicutes.Bacilli.Lactobacillales.Streptococcaceae.unclassified_genus       | 3.383025317 |                |             |
| Bacteria.Firmicutes.Bacilli.Lactobacillales.unclassified_family                       | 2.864867349 |                |             |
| Bacteria.Firmicutes.Bacilli.Lactobacillales.unclassified_family.unclassified_genus    | 2.864867349 |                |             |
| Bacteria.Firmicutes.Bacilli.unclassified_order                                        | 0           |                |             |
| Bacteria.Firmicutes.Bacilli.unclassified_order.unclassified_family                    | 0           |                |             |
| Bacteria.Firmicutes.Bacilli.unclassified_order.unclassified_family.unclassified_genus | 0           |                |             |
| Bacteria.Firmicutes.Clostridia                                                        | 4.249252681 | Fishmeal-based | 3.707129323 |
| Bacteria.Firmicutes.Clostridia.Clostridiales                                          | 4.249252681 | Fishmeal-based | 3.724284724 |
| Bacteria.Firmicutes.Clostridia.Clostridiales.Clostridiaceae                           | 2.855425792 |                |             |
| Bacteria.Firmicutes.Clostridia.Clostridiales.Clostridiaceae.Clostridium               | 2.855425792 |                |             |
| Bacteria.Firmicutes.Clostridia.Clostridiales.Clostridiaceae.Thermobrachium            | 0           |                |             |
| Bacteria.Firmicutes.Clostridia.Clostridiales.Clostridiaceae.unclassified_genus        | 0           |                |             |
| Bacteria.Firmicutes.Clostridia.Clostridiales.Eubacteriaceae                           | 0           |                |             |
| Bacteria.Firmicutes.Clostridia.Clostridiales.Eubacteriaceae.Eubacterium               | 0           |                |             |
| Bacteria.Firmicutes.Clostridia.Clostridiales.Eubacteriaceae.unclassified_genus        | 0           |                |             |
| Bacteria.Firmicutes.Clostridia.Clostridiales.IncertaeSedisXI                          | 2.864867349 |                |             |
| Bacteria.Firmicutes.Clostridia.Clostridiales.IncertaeSedisXI.Anaerococcus             | 0           |                |             |
| Bacteria.Firmicutes.Clostridia.Clostridiales.IncertaeSedisXI.Anaerosphaera            | 0           |                |             |
| Bacteria.Firmicutes.Clostridia.Clostridiales.IncertaeSedisXI.Finegoldia               | 0           |                |             |
| Bacteria.Firmicutes.Clostridia.Clostridiales.IncertaeSedisXI.Gallicola                | 0           |                |             |
| Bacteria.Firmicutes.Clostridia.Clostridiales.IncertaeSedisXI.Parvimonas               | 0           |                |             |
| Bacteria.Firmicutes.Clostridia.Clostridiales.IncertaeSedisXI.Peptoniphilus            | 0           |                |             |
| Bacteria.Firmicutes.Clostridia.Clostridiales.IncertaeSedisXI.Sporanaerobacter         | 0           |                |             |
| Bacteria.Firmicutes.Clostridia.Clostridiales.IncertaeSedisXI.Tepidimicrobium          | 0           |                |             |
| Bacteria.Firmicutes.Clostridia.Clostridiales.IncertaeSedisXI.Tissierella              | 0           |                |             |
| Bacteria.Firmicutes.Clostridia.Clostridiales.IncertaeSedisXI.unclassified_genus       | 2.864867349 |                |             |
| Bacteria.Firmicutes.Clostridia.Clostridiales.IncertaeSedisXIII                        | 0           |                |             |
| Bacteria.Firmicutes.Clostridia.Clostridiales.IncertaeSedisXIII.Anaerovorax            | 0           |                |             |
| Bacteria.Firmicutes.Clostridia.Clostridiales.IncertaeSedisXIII.unclassified_genus     | 0           |                |             |
| Bacteria.Firmicutes.Clostridia.Clostridiales.IncertaeSedisXIV                         | 0           |                |             |
| Bacteria.Firmicutes.Clostridia.Clostridiales.IncertaeSedisXIV.Blautia                 | 0           |                |             |
| Bacteria.Firmicutes.Clostridia.Clostridiales.Lachnospiraceae                          | 0           |                |             |
| Bacteria.Firmicutes.Clostridia.Clostridiales.Lachnospiraceae.Anaerosporebacter        | 0           |                |             |
| Bacteria.Firmicutes.Clostridia.Clostridiales.Lachnospiraceae.Oribacterium             | 0           |                |             |
| Bacteria.Firmicutes.Clostridia.Clostridiales.Lachnospiraceae.unclassified_genus       | 0           |                |             |
| Bacteria.Firmicutes.Clostridia.Clostridiales.Peptococcaceae                           | 0           |                |             |
| Bacteria.Firmicutes.Clostridia.Clostridiales.Peptococcaceae.Peptococcus               | 0           |                |             |
| Bacteria.Firmicutes.Clostridia.Clostridiales.Peptococcaceae.unclassified_genus        | 0           |                |             |
| Bacteria.Firmicutes.Clostridia.Clostridiales.Peptostreptococcaceae                    | 2.864867349 |                |             |
| Bacteria.Firmicutes.Clostridia.Clostridiales.Peptostreptococcaceae.Peptostreptococcus | 0           |                |             |
| Bacteria.Firmicutes.Clostridia.Clostridiales.Peptostreptococcaceae.Sporacetigenium    | 0           |                |             |
| Bacteria.Firmicutes.Clostridia.Clostridiales.Peptostreptococcaceae.unclassified_genus | 2.864867349 |                |             |
| Bacteria.Firmicutes.Clostridia.Clostridiales.Ruminococcaceae                          | 3.778293169 |                |             |
| Bacteria.Firmicutes.Clostridia.Clostridiales.Ruminococcaceae.Acetivibrio              | 0           |                |             |
| Bacteria.Firmicutes.Clostridia.Clostridiales.Ruminococcaceae.Anaerofilium             | 0           |                |             |
| Bacteria.Firmicutes.Clostridia.Clostridiales.Ruminococcaceae.Anaerotruncus            | 0           |                |             |
| Bacteria.Firmicutes.Clostridia.Clostridiales.Ruminococcaceae.Butyrivibrio             | 0           |                |             |
| Bacteria.Firmicutes.Clostridia.Clostridiales.Ruminococcaceae.Faecalibacterium         | 0           |                |             |
| Bacteria.Firmicutes.Clostridia.Clostridiales.Ruminococcaceae.Oscillibacter            | 0           |                |             |
| Bacteria.Firmicutes.Clostridia.Clostridiales.Ruminococcaceae.Ruminococcus             | 0           |                |             |
| Bacteria.Firmicutes.Clostridia.Clostridiales.Ruminococcaceae.Subdoligranulum          | 0           |                |             |
| Bacteria.Firmicutes.Clostridia.Clostridiales.Ruminococcaceae.unclassified_genus       | 3.778293169 |                |             |

|                                                                                                                 |             |                |             |
|-----------------------------------------------------------------------------------------------------------------|-------------|----------------|-------------|
| Bacteria.Firmicutes.Clostridia.Clostridiales.unclassified_family                                                | 0           |                |             |
| Bacteria.Firmicutes.Clostridia.Clostridiales.unclassified_family.unclassified_genus                             | 0           |                |             |
| Bacteria.Firmicutes.Clostridia.Clostridiales.Veillonellaceae                                                    | 3.980830792 | Fishmeal-based | 3.418172437 |
| Bacteria.Firmicutes.Clostridia.Clostridiales.Veillonellaceae.Anaerococcus                                       | 0           |                |             |
| Bacteria.Firmicutes.Clostridia.Clostridiales.Veillonellaceae.Dialister                                          | 0           |                |             |
| Bacteria.Firmicutes.Clostridia.Clostridiales.Veillonellaceae.Megasphaera                                        | 0           |                |             |
| Bacteria.Firmicutes.Clostridia.Clostridiales.Veillonellaceae.Phascocartobacterium                               | 0           |                |             |
| Bacteria.Firmicutes.Clostridia.Clostridiales.Veillonellaceae.Selenomonas                                        | 0           |                |             |
| Bacteria.Firmicutes.Clostridia.Clostridiales.Veillonellaceae.Sporomusa                                          | 0           |                |             |
| Bacteria.Firmicutes.Clostridia.Clostridiales.Veillonellaceae.Sporotalea                                         | 0           |                |             |
| Bacteria.Firmicutes.Clostridia.Clostridiales.Veillonellaceae.unclassified_genus                                 | 0           |                |             |
| Bacteria.Firmicutes.Clostridia.Clostridiales.Veillonellaceae.Veillonella                                        | 3.980830792 | Fishmeal-based | 3.440276455 |
| Bacteria.Firmicutes.Clostridia.unclassified_order                                                               | 0           |                |             |
| Bacteria.Firmicutes.Clostridia.unclassified_order.unclassified_family                                           | 0           |                |             |
| Bacteria.Firmicutes.Clostridia.unclassified_order.unclassified_family.unclassified_genus                        | 0           |                |             |
| Bacteria.Firmicutes.Erysipelotrichi                                                                             | 0           |                |             |
| Bacteria.Firmicutes.Erysipelotrichi.Erysipelotrichales                                                          | 0           |                |             |
| Bacteria.Firmicutes.Erysipelotrichi.Erysipelotrichales.Erysipelotrichaceae                                      | 0           |                |             |
| Bacteria.Firmicutes.Erysipelotrichi.Erysipelotrichales.Erysipelotrichaceae.Allobaculum                          | 0           |                |             |
| Bacteria.Firmicutes.Erysipelotrichi.Erysipelotrichales.Erysipelotrichaceae.Erysipelothrix                       | 0           |                |             |
| Bacteria.Firmicutes.Erysipelotrichi.Erysipelotrichales.Erysipelotrichaceae.Turicibacter                         | 0           |                |             |
| Bacteria.Firmicutes.Erysipelotrichi.Erysipelotrichales.Erysipelotrichaceae.unclassified_genus                   | 0           |                |             |
| Bacteria.Firmicutes.unclassified_class                                                                          | 0           |                |             |
| Bacteria.Firmicutes.unclassified_class.unclassified_order                                                       | 0           |                |             |
| Bacteria.Firmicutes.unclassified_class.unclassified_order.unclassified_family                                   | 0           |                |             |
| Bacteria.Firmicutes.unclassified_class.unclassified_order.unclassified_family.unclassified_genus                | 0           |                |             |
| Bacteria.Fusobacteria                                                                                           | 0           |                |             |
| Bacteria.Fusobacteria.Fusobacteria                                                                              | 0           |                |             |
| Bacteria.Fusobacteria.Fusobacteria.Fusobacteriales                                                              | 0           |                |             |
| Bacteria.Fusobacteria.Fusobacteria.Fusobacteriales.Fusobacteriaceae                                             | 0           |                |             |
| Bacteria.Fusobacteria.Fusobacteria.Fusobacteriales.Fusobacteriaceae.Cetobacterium                               | 0           |                |             |
| Bacteria.Fusobacteria.Fusobacteria.Fusobacteriales.Fusobacteriaceae.Fusobacterium                               | 0           |                |             |
| Bacteria.Fusobacteria.Fusobacteria.Fusobacteriales.Fusobacteriaceae.unclassified_genus                          | 0           |                |             |
| Bacteria.Fusobacteria.Fusobacteria.Fusobacteriales.Leptotrichiaceae                                             | 0           |                |             |
| Bacteria.Fusobacteria.Fusobacteria.Fusobacteriales.Leptotrichiaceae.Leptotrichia                                | 0           |                |             |
| Bacteria.Fusobacteria.Fusobacteria.Fusobacteriales.Leptotrichiaceae.Seibaldella                                 | 0           |                |             |
| Bacteria.Fusobacteria.Fusobacteria.Fusobacteriales.unclassified_family                                          | 0           |                |             |
| Bacteria.Fusobacteria.Fusobacteria.Fusobacteriales.unclassified_family.unclassified_genus                       | 0           |                |             |
| Bacteria.Gemmatimonadetes                                                                                       | 0           |                |             |
| Bacteria.Gemmatimonadetes.Gemmatimonadetes                                                                      | 0           |                |             |
| Bacteria.Gemmatimonadetes.Gemmatimonadetes.Gemmatimonadales                                                     | 0           |                |             |
| Bacteria.Gemmatimonadetes.Gemmatimonadetes.Gemmatimonadales.Gemmatimonadaceae                                   | 0           |                |             |
| Bacteria.Gemmatimonadetes.Gemmatimonadetes.Gemmatimonadales.Gemmatimonadaceae.Gemmatimonas                      | 0           |                |             |
| Bacteria.Nitrospira                                                                                             | 0           |                |             |
| Bacteria.Nitrospira.Nitrospira                                                                                  | 0           |                |             |
| Bacteria.Nitrospira.Nitrospira.Nitrospirales                                                                    | 0           |                |             |
| Bacteria.Nitrospira.Nitrospira.Nitrospirales.Nitrospiraceae                                                     | 0           |                |             |
| Bacteria.Nitrospira.Nitrospira.Nitrospirales.Nitrospiraceae.Nitrospira                                          | 0           |                |             |
| Bacteria.OD1                                                                                                    | 0           |                |             |
| Bacteria.OD1.OD1_genera_incertae_sedis                                                                          | 0           |                |             |
| Bacteria.OD1.OD1_genera_incertae_sedis.unclassified_order                                                       | 0           |                |             |
| Bacteria.OD1.OD1_genera_incertae_sedis.unclassified_order.unclassified_family                                   | 0           |                |             |
| Bacteria.OD1.OD1_genera_incertae_sedis.unclassified_order.unclassified_family.unclassified_genus                | 0           |                |             |
| Bacteria.Planctomycetes                                                                                         | 0           |                |             |
| Bacteria.Planctomycetes.Planctomycetacia                                                                        | 0           |                |             |
| Bacteria.Planctomycetes.Planctomycetacia.Planctomycetales                                                       | 0           |                |             |
| Bacteria.Planctomycetes.Planctomycetacia.Planctomycetales.Planctomycetaceae                                     | 0           |                |             |
| Bacteria.Planctomycetes.Planctomycetacia.Planctomycetales.Planctomycetaceae.Gemmata                             | 0           |                |             |
| Bacteria.Planctomycetes.Planctomycetacia.Planctomycetales.Planctomycetaceae.Planctomycetes                      | 0           |                |             |
| Bacteria.Planctomycetes.Planctomycetacia.Planctomycetales.Planctomycetaceae.Rhodopirellula                      | 0           |                |             |
| Bacteria.Planctomycetes.Planctomycetacia.Planctomycetales.Planctomycetaceae.Singulisphaera                      | 0           |                |             |
| Bacteria.Planctomycetes.Planctomycetacia.Planctomycetales.Planctomycetaceae.unclassified_genus                  | 0           |                |             |
| Bacteria.Proteobacteria                                                                                         | 5.638528076 |                |             |
| Bacteria.Proteobacteria.Alphaproteobacteria                                                                     | 5.364409131 |                |             |
| Bacteria.Proteobacteria.Alphaproteobacteria.Alphaproteobacteria_incertae_sedis                                  | 2.776244546 |                |             |
| Bacteria.Proteobacteria.Alphaproteobacteria.Alphaproteobacteria_incertae_sedis.Novispirillum                    | 2.776244546 |                |             |
| Bacteria.Proteobacteria.Alphaproteobacteria.Alphaproteobacteria_incertae_sedis.Novispirillum.unclassified_genus | 2.776244546 |                |             |
| Bacteria.Proteobacteria.Alphaproteobacteria.Caulobacterales                                                     | 0           |                |             |
| Bacteria.Proteobacteria.Alphaproteobacteria.Caulobacterales.Caulobacteraceae                                    | 0           |                |             |
| Bacteria.Proteobacteria.Alphaproteobacteria.Caulobacterales.Caulobacteraceae.Asticcacaulis                      | 0           |                |             |
| Bacteria.Proteobacteria.Alphaproteobacteria.Caulobacterales.Caulobacteraceae.Brevundimonas                      | 0           |                |             |
| Bacteria.Proteobacteria.Alphaproteobacteria.Caulobacterales.Caulobacteraceae.Caulobacter                        | 0           |                |             |
| Bacteria.Proteobacteria.Alphaproteobacteria.Caulobacterales.Caulobacteraceae.Phenylobacterium                   | 0           |                |             |
| Bacteria.Proteobacteria.Alphaproteobacteria.Caulobacterales.Caulobacteraceae.unclassified_genus                 | 0           |                |             |
| Bacteria.Proteobacteria.Alphaproteobacteria.Rhizobiales                                                         | 4.176563699 |                |             |
| Bacteria.Proteobacteria.Alphaproteobacteria.Rhizobiales.Bradyrhizobiaceae                                       | 4.176563699 |                |             |
| Bacteria.Proteobacteria.Alphaproteobacteria.Rhizobiales.Bradyrhizobiaceae.Agromonas                             | 0           |                |             |
| Bacteria.Proteobacteria.Alphaproteobacteria.Rhizobiales.Bradyrhizobiaceae.Bosea                                 | 0           |                |             |
| Bacteria.Proteobacteria.Alphaproteobacteria.Rhizobiales.Bradyrhizobiaceae.unclassified_genus                    | 4.176563699 |                |             |
| Bacteria.Proteobacteria.Alphaproteobacteria.Rhizobiales.Brucellaceae                                            | 0           |                |             |
| Bacteria.Proteobacteria.Alphaproteobacteria.Rhizobiales.Brucellaceae.Ochrobactrum                               | 0           |                |             |
| Bacteria.Proteobacteria.Alphaproteobacteria.Rhizobiales.Hyphomicrobiaceae                                       | 0           |                |             |
| Bacteria.Proteobacteria.Alphaproteobacteria.Rhizobiales.Hyphomicrobiaceae.Devosia                               | 0           |                |             |
| Bacteria.Proteobacteria.Alphaproteobacteria.Rhizobiales.Hyphomicrobiaceae.unclassified_genus                    | 0           |                |             |
| Bacteria.Proteobacteria.Alphaproteobacteria.Rhizobiales.Methylobacteriaceae                                     | 0           |                |             |
| Bacteria.Proteobacteria.Alphaproteobacteria.Rhizobiales.Methylobacteriaceae.Methylobacterium                    | 0           |                |             |
| Bacteria.Proteobacteria.Alphaproteobacteria.Rhizobiales.Methylobacteriaceae.unclassified_genus                  | 0           |                |             |
| Bacteria.Proteobacteria.Alphaproteobacteria.Rhizobiales.Methylocystaceae                                        | 0           |                |             |
| Bacteria.Proteobacteria.Alphaproteobacteria.Rhizobiales.Methylocystaceae.Methylocystis                          | 0           |                |             |
| Bacteria.Proteobacteria.Alphaproteobacteria.Rhizobiales.Methylocystaceae.unclassified_genus                     | 0           |                |             |
| Bacteria.Proteobacteria.Alphaproteobacteria.Rhizobiales.Rhizobiaceae                                            | 0           |                |             |
| Bacteria.Proteobacteria.Alphaproteobacteria.Rhizobiales.Rhizobiaceae.Rhizobium                                  | 0           |                |             |
| Bacteria.Proteobacteria.Alphaproteobacteria.Rhizobiales.Rhizobiaceae.Sinorhizobium                              | 0           |                |             |
| Bacteria.Proteobacteria.Alphaproteobacteria.Rhizobiales.unclassified_family                                     | 2.864867349 |                |             |
| Bacteria.Proteobacteria.Alphaproteobacteria.Rhizobiales.unclassified_family.unclassified_genus                  | 2.864867349 |                |             |
| Bacteria.Proteobacteria.Alphaproteobacteria.Rhizobiales.Xanthobacteraceae                                       | 0           |                |             |
| Bacteria.Proteobacteria.Alphaproteobacteria.Rhizobiales.Xanthobacteraceae.Azorhizobium                          | 0           |                |             |
| Bacteria.Proteobacteria.Alphaproteobacteria.Rhodobacteriales                                                    | 0           |                |             |
| Bacteria.Proteobacteria.Alphaproteobacteria.Rhodobacteriales.Rhodobacteraceae                                   | 0           |                |             |
| Bacteria.Proteobacteria.Alphaproteobacteria.Rhodobacteriales.Rhodobacteraceae.Haematobacter                     | 0           |                |             |
| Bacteria.Proteobacteria.Alphaproteobacteria.Rhodobacteriales.Rhodobacteraceae.Pannonibacter                     | 0           |                |             |
| Bacteria.Proteobacteria.Alphaproteobacteria.Rhodobacteriales.Rhodobacteraceae.Paracoccus                        | 0           |                |             |
| Bacteria.Proteobacteria.Alphaproteobacteria.Rhodobacteriales.Rhodobacteraceae.Rhodobacter                       | 0           |                |             |
| Bacteria.Proteobacteria.Alphaproteobacteria.Rhodobacteriales.Rhodobacteraceae.Rubellimicrobium                  | 0           |                |             |
| Bacteria.Proteobacteria.Alphaproteobacteria.Rhodobacteriales.Rhodobacteraceae.unclassified_genus                | 0           |                |             |

|                                                                                                              |             |  |
|--------------------------------------------------------------------------------------------------------------|-------------|--|
| Bacteria.Proteobacteria.Alphaproteobacteria.Rhodospirillales                                                 | 0           |  |
| Bacteria.Proteobacteria.Alphaproteobacteria.Rhodospirillales.Acetobacteraceae                                | 0           |  |
| Bacteria.Proteobacteria.Alphaproteobacteria.Rhodospirillales.Acetobacteraceae.Acetobacter                    | 0           |  |
| Bacteria.Proteobacteria.Alphaproteobacteria.Rhodospirillales.Acetobacteraceae.Belnapia                       | 0           |  |
| Bacteria.Proteobacteria.Alphaproteobacteria.Rhodospirillales.Acetobacteraceae.Gluconacetobacter              | 0           |  |
| Bacteria.Proteobacteria.Alphaproteobacteria.Rhodospirillales.Acetobacteraceae.Gluconobacter                  | 0           |  |
| Bacteria.Proteobacteria.Alphaproteobacteria.Rhodospirillales.Acetobacteraceae.Roseococcus                    | 0           |  |
| Bacteria.Proteobacteria.Alphaproteobacteria.Rhodospirillales.Acetobacteraceae.Roseomonas                     | 0           |  |
| Bacteria.Proteobacteria.Alphaproteobacteria.Rhodospirillales.Acetobacteraceae.unclassified_genus             | 0           |  |
| Bacteria.Proteobacteria.Alphaproteobacteria.Rhodospirillales.Rhodospirillaceae                               | 0           |  |
| Bacteria.Proteobacteria.Alphaproteobacteria.Rhodospirillales.Rhodospirillaceae.Azospillum                    | 0           |  |
| Bacteria.Proteobacteria.Alphaproteobacteria.Rhodospirillales.Rhodospirillaceae.Skermanella                   | 0           |  |
| Bacteria.Proteobacteria.Alphaproteobacteria.Rhodospirillales.Rhodospirillaceae.Telmatospillum                | 0           |  |
| Bacteria.Proteobacteria.Alphaproteobacteria.Rhodospirillales.Rhodospirillaceae.unclassified_genus            | 0           |  |
| Bacteria.Proteobacteria.Alphaproteobacteria.Sphingomonadales                                                 | 5.334072961 |  |
| Bacteria.Proteobacteria.Alphaproteobacteria.Sphingomonadales.Erythrobacteraceae                              | 0           |  |
| Bacteria.Proteobacteria.Alphaproteobacteria.Sphingomonadales.Erythrobacteraceae.Porphrobacter                | 0           |  |
| Bacteria.Proteobacteria.Alphaproteobacteria.Sphingomonadales.Sphingomonadaceae                               | 5.334072961 |  |
| Bacteria.Proteobacteria.Alphaproteobacteria.Sphingomonadales.Sphingomonadaceae.Blastomonas                   | 0           |  |
| Bacteria.Proteobacteria.Alphaproteobacteria.Sphingomonadales.Sphingomonadaceae.Novosphingobium               | 0           |  |
| Bacteria.Proteobacteria.Alphaproteobacteria.Sphingomonadales.Sphingomonadaceae.Sphingobium                   | 0           |  |
| Bacteria.Proteobacteria.Alphaproteobacteria.Sphingomonadales.Sphingomonadaceae.Sphingomonas                  | 5.288179014 |  |
| Bacteria.Proteobacteria.Alphaproteobacteria.Sphingomonadales.Sphingomonadaceae.unclassified_genus            | 4.335299145 |  |
| Bacteria.Proteobacteria.Alphaproteobacteria.Sphingomonadales.unclassified_family                             | 0           |  |
| Bacteria.Proteobacteria.Alphaproteobacteria.Sphingomonadales.unclassified_family.unclassified_genus          | 0           |  |
| Bacteria.Proteobacteria.Alphaproteobacteria.unclassified_order                                               | 0           |  |
| Bacteria.Proteobacteria.Alphaproteobacteria.unclassified_order.unclassified_family                           | 0           |  |
| Bacteria.Proteobacteria.Alphaproteobacteria.unclassified_order.unclassified_family.unclassified_genus        | 0           |  |
| Bacteria.Proteobacteria.Betaproteobacteria                                                                   | 4.429452046 |  |
| Bacteria.Proteobacteria.Betaproteobacteria.Burkholderiales                                                   | 4.378057692 |  |
| Bacteria.Proteobacteria.Betaproteobacteria.Burkholderiales.Alcaligenaceae                                    | 0           |  |
| Bacteria.Proteobacteria.Betaproteobacteria.Burkholderiales.Alcaligenaceae.Achromobacter                      | 0           |  |
| Bacteria.Proteobacteria.Betaproteobacteria.Burkholderiales.Alcaligenaceae.Alcaligenes                        | 0           |  |
| Bacteria.Proteobacteria.Betaproteobacteria.Burkholderiales.Alcaligenaceae.Sutterella                         | 0           |  |
| Bacteria.Proteobacteria.Betaproteobacteria.Burkholderiales.Alcaligenaceae.unclassified_genus                 | 0           |  |
| Bacteria.Proteobacteria.Betaproteobacteria.Burkholderiales.Burkholderiaceae                                  | 3.072629637 |  |
| Bacteria.Proteobacteria.Betaproteobacteria.Burkholderiales.Burkholderiaceae.Burkholderia                     | 3.072629637 |  |
| Bacteria.Proteobacteria.Betaproteobacteria.Burkholderiales.Burkholderiaceae.Chilimonas                       | 0           |  |
| Bacteria.Proteobacteria.Betaproteobacteria.Burkholderiales.Burkholderiaceae.Cupriavidus                      | 0           |  |
| Bacteria.Proteobacteria.Betaproteobacteria.Burkholderiales.Burkholderiaceae.Pandoraea                        | 0           |  |
| Bacteria.Proteobacteria.Betaproteobacteria.Burkholderiales.Burkholderiaceae.Polynucleobacter                 | 0           |  |
| Bacteria.Proteobacteria.Betaproteobacteria.Burkholderiales.Burkholderiaceae.Ralstonia                        | 0           |  |
| Bacteria.Proteobacteria.Betaproteobacteria.Burkholderiales.Burkholderiaceae.unclassified_genus               | 0           |  |
| Bacteria.Proteobacteria.Betaproteobacteria.Burkholderiales.Burkholderiales.incertae_sedis                    | 3.074958299 |  |
| Bacteria.Proteobacteria.Betaproteobacteria.Burkholderiales.Burkholderiales.incertae_sedis.Aquabacterium      | 3.074958299 |  |
| Bacteria.Proteobacteria.Betaproteobacteria.Burkholderiales.Burkholderiales.incertae_sedis.Ideonella          | 0           |  |
| Bacteria.Proteobacteria.Betaproteobacteria.Burkholderiales.Burkholderiales.incertae_sedis.Leptothrix         | 0           |  |
| Bacteria.Proteobacteria.Betaproteobacteria.Burkholderiales.Burkholderiales.incertae_sedis.Tepidimonas        | 0           |  |
| Bacteria.Proteobacteria.Betaproteobacteria.Burkholderiales.Burkholderiales.incertae_sedis.unclassified_genus | 0           |  |
| Bacteria.Proteobacteria.Betaproteobacteria.Burkholderiales.Comamonadaceae                                    | 4.268178529 |  |
| Bacteria.Proteobacteria.Betaproteobacteria.Burkholderiales.Comamonadaceae.Acidovorax                         | 4.192250992 |  |
| Bacteria.Proteobacteria.Betaproteobacteria.Burkholderiales.Comamonadaceae.Alicyclophilius                    | 0           |  |
| Bacteria.Proteobacteria.Betaproteobacteria.Burkholderiales.Comamonadaceae.Comamonas                          | 0           |  |
| Bacteria.Proteobacteria.Betaproteobacteria.Burkholderiales.Comamonadaceae.Curvibacter                        | 0           |  |
| Bacteria.Proteobacteria.Betaproteobacteria.Burkholderiales.Comamonadaceae.Delftia                            | 0           |  |
| Bacteria.Proteobacteria.Betaproteobacteria.Burkholderiales.Comamonadaceae.Diaphorobacter                     | 3.473382719 |  |
| Bacteria.Proteobacteria.Betaproteobacteria.Burkholderiales.Comamonadaceae.Hydrogenophaga                     | 0           |  |
| Bacteria.Proteobacteria.Betaproteobacteria.Burkholderiales.Comamonadaceae.Pelomonas                          | 0           |  |
| Bacteria.Proteobacteria.Betaproteobacteria.Burkholderiales.Comamonadaceae.Polaromonas                        | 0           |  |
| Bacteria.Proteobacteria.Betaproteobacteria.Burkholderiales.Comamonadaceae.Rhodoferax                         | 0           |  |
| Bacteria.Proteobacteria.Betaproteobacteria.Burkholderiales.Comamonadaceae.unclassified_genus                 | 0           |  |
| Bacteria.Proteobacteria.Betaproteobacteria.Burkholderiales.Comamonadaceae.Variovorax                         | 0           |  |
| Bacteria.Proteobacteria.Betaproteobacteria.Burkholderiales.Oxalobacteraceae                                  | 2.776244546 |  |
| Bacteria.Proteobacteria.Betaproteobacteria.Burkholderiales.Oxalobacteraceae.Duganella                        | 0           |  |
| Bacteria.Proteobacteria.Betaproteobacteria.Burkholderiales.Oxalobacteraceae.Herbaspirillum                   | 0           |  |
| Bacteria.Proteobacteria.Betaproteobacteria.Burkholderiales.Oxalobacteraceae.Janthinobacterium                | 0           |  |
| Bacteria.Proteobacteria.Betaproteobacteria.Burkholderiales.Oxalobacteraceae.Massilia                         | 0           |  |
| Bacteria.Proteobacteria.Betaproteobacteria.Burkholderiales.Oxalobacteraceae.Oxalobacter                      | 0           |  |
| Bacteria.Proteobacteria.Betaproteobacteria.Burkholderiales.Oxalobacteraceae.unclassified_genus               | 2.776244546 |  |
| Bacteria.Proteobacteria.Betaproteobacteria.Burkholderiales.unclassified_family                               | 3.374850036 |  |
| Bacteria.Proteobacteria.Betaproteobacteria.Burkholderiales.unclassified_family.unclassified_genus            | 3.374850036 |  |
| Bacteria.Proteobacteria.Betaproteobacteria.Hydrogenophilales                                                 | 0           |  |
| Bacteria.Proteobacteria.Betaproteobacteria.Hydrogenophilales.Hydrogenophilaceae                              | 0           |  |
| Bacteria.Proteobacteria.Betaproteobacteria.Hydrogenophilales.Hydrogenophilaceae.Hydrogenophilus              | 0           |  |
| Bacteria.Proteobacteria.Betaproteobacteria.Hydrogenophilales.Hydrogenophilaceae.Petrobacter                  | 0           |  |
| Bacteria.Proteobacteria.Betaproteobacteria.Methylophilales                                                   | 0           |  |
| Bacteria.Proteobacteria.Betaproteobacteria.Methylophilales.Methylophilaceae                                  | 0           |  |
| Bacteria.Proteobacteria.Betaproteobacteria.Methylophilales.Methylophilaceae.Methylobacillus                  | 0           |  |
| Bacteria.Proteobacteria.Betaproteobacteria.Methylophilales.Methylophilaceae.Methylophilus                    | 0           |  |
| Bacteria.Proteobacteria.Betaproteobacteria.Methylophilales.Methylophilaceae.unclassified_genus               | 0           |  |
| Bacteria.Proteobacteria.Betaproteobacteria.Neisseriales                                                      | 3.561016158 |  |
| Bacteria.Proteobacteria.Betaproteobacteria.Neisseriales.Neisseriaceae                                        | 3.561016158 |  |
| Bacteria.Proteobacteria.Betaproteobacteria.Neisseriales.Neisseriaceae.Aquitalea                              | 0           |  |
| Bacteria.Proteobacteria.Betaproteobacteria.Neisseriales.Neisseriaceae.Kingella                               | 0           |  |
| Bacteria.Proteobacteria.Betaproteobacteria.Neisseriales.Neisseriaceae.Microvirgula                           | 3.561016158 |  |
| Bacteria.Proteobacteria.Betaproteobacteria.Neisseriales.Neisseriaceae.Neisseria                              | 0           |  |
| Bacteria.Proteobacteria.Betaproteobacteria.Neisseriales.Neisseriaceae.unclassified_genus                     | 0           |  |
| Bacteria.Proteobacteria.Betaproteobacteria.Neisseriales.Neisseriaceae.Uruburuella                            | 0           |  |
| Bacteria.Proteobacteria.Betaproteobacteria.Neisseriales.Neisseriaceae.Vitrosocilla                           | 0           |  |
| Bacteria.Proteobacteria.Betaproteobacteria.Neisseriales.Neisseriaceae.Vogesella                              | 3.077274542 |  |
| Bacteria.Proteobacteria.Betaproteobacteria.Nitrosomonadales                                                  | 0           |  |
| Bacteria.Proteobacteria.Betaproteobacteria.Nitrosomonadales.Nitrosomonadaceae                                | 0           |  |
| Bacteria.Proteobacteria.Betaproteobacteria.Nitrosomonadales.Nitrosomonadaceae.Nitrosospira                   | 0           |  |
| Bacteria.Proteobacteria.Betaproteobacteria.Nitrosomonadales.Nitrosomonadaceae.unclassified_genus             | 0           |  |
| Bacteria.Proteobacteria.Betaproteobacteria.Rhodocyclales                                                     | 0           |  |
| Bacteria.Proteobacteria.Betaproteobacteria.Rhodocyclales.Rhodocyclaceae                                      | 0           |  |
| Bacteria.Proteobacteria.Betaproteobacteria.Rhodocyclales.Rhodocyclaceae.Azonexus                             | 0           |  |
| Bacteria.Proteobacteria.Betaproteobacteria.Rhodocyclales.Rhodocyclaceae.Azospira                             | 0           |  |
| Bacteria.Proteobacteria.Betaproteobacteria.Rhodocyclales.Rhodocyclaceae.Dechloromonas                        | 0           |  |
| Bacteria.Proteobacteria.Betaproteobacteria.Rhodocyclales.Rhodocyclaceae.Methyloversatilis                    | 0           |  |
| Bacteria.Proteobacteria.Betaproteobacteria.Rhodocyclales.Rhodocyclaceae.Propionivibrio                       | 0           |  |
| Bacteria.Proteobacteria.Betaproteobacteria.Rhodocyclales.Rhodocyclaceae.Shinella                             | 0           |  |
| Bacteria.Proteobacteria.Betaproteobacteria.Rhodocyclales.Rhodocyclaceae.Thaueria                             | 0           |  |



|                                                                                                             |             |                |             |
|-------------------------------------------------------------------------------------------------------------|-------------|----------------|-------------|
| Bacteria.Proteobacteria.Betaproteobacteria.Rhodocyclales.Rhodocyclaceae.unclassified_genus                  | 0           |                |             |
| Bacteria.Proteobacteria.Betaproteobacteria.Rhodocyclales.Rhodocyclaceae.Zoogloea                            | 0           |                |             |
| Bacteria.Proteobacteria.Betaproteobacteria.unclassified_order                                               | 0           |                |             |
| Bacteria.Proteobacteria.Betaproteobacteria.unclassified_order.unclassified_family                           | 0           |                |             |
| Bacteria.Proteobacteria.Betaproteobacteria.unclassified_order.unclassified_family.unclassified_genus        | 0           |                |             |
| Bacteria.Proteobacteria.Deltaproteobacteria                                                                 | 0           |                |             |
| Bacteria.Proteobacteria.Deltaproteobacteria.Bdellovibrionales                                               | 0           |                |             |
| Bacteria.Proteobacteria.Deltaproteobacteria.Bdellovibrionales.Bacteriovoraceae                              | 0           |                |             |
| Bacteria.Proteobacteria.Deltaproteobacteria.Bdellovibrionales.Bacteriovoraceae.Bacteriovorax                | 0           |                |             |
| Bacteria.Proteobacteria.Deltaproteobacteria.Bdellovibrionales.Bacteriovoraceae.Peredibacter                 | 0           |                |             |
| Bacteria.Proteobacteria.Deltaproteobacteria.Bdellovibrionales.Bdellovibrionaceae                            | 0           |                |             |
| Bacteria.Proteobacteria.Deltaproteobacteria.Bdellovibrionales.Bdellovibrionaceae.Bdellovibrio               | 0           |                |             |
| Bacteria.Proteobacteria.Deltaproteobacteria.Desulfobivriales                                                | 0           |                |             |
| Bacteria.Proteobacteria.Deltaproteobacteria.Desulfobivriales.Desulfobivriaceae                              | 0           |                |             |
| Bacteria.Proteobacteria.Deltaproteobacteria.Desulfobivriales.Desulfobivriaceae.Desulfobivrio                | 0           |                |             |
| Bacteria.Proteobacteria.Deltaproteobacteria.Desulfuromonadales                                              | 0           |                |             |
| Bacteria.Proteobacteria.Deltaproteobacteria.Desulfuromonadales.Geobacteraceae                               | 0           |                |             |
| Bacteria.Proteobacteria.Deltaproteobacteria.Desulfuromonadales.Geobacteraceae.Geobacter                     | 0           |                |             |
| Bacteria.Proteobacteria.Deltaproteobacteria.Myxococcales                                                    | 0           |                |             |
| Bacteria.Proteobacteria.Deltaproteobacteria.Myxococcales.Cystobacteraceae                                   | 0           |                |             |
| Bacteria.Proteobacteria.Deltaproteobacteria.Myxococcales.Cystobacteraceae.Cystobacter                       | 0           |                |             |
| Bacteria.Proteobacteria.Deltaproteobacteria.Myxococcales.Cystobacteraceae.unclassified_genus                | 0           |                |             |
| Bacteria.Proteobacteria.Deltaproteobacteria.Myxococcales.Nannocystaceae                                     | 0           |                |             |
| Bacteria.Proteobacteria.Deltaproteobacteria.Myxococcales.Nannocystaceae.Nannocystis                         | 0           |                |             |
| Bacteria.Proteobacteria.Deltaproteobacteria.Myxococcales.Polyangiaceae                                      | 0           |                |             |
| Bacteria.Proteobacteria.Deltaproteobacteria.Myxococcales.Polyangiaceae.Byssovorax                           | 0           |                |             |
| Bacteria.Proteobacteria.Deltaproteobacteria.Myxococcales.Polyangiaceae.unclassified_genus                   | 0           |                |             |
| Bacteria.Proteobacteria.Deltaproteobacteria.Myxococcales.unclassified_family                                | 0           |                |             |
| Bacteria.Proteobacteria.Deltaproteobacteria.Myxococcales.unclassified_family.unclassified_genus             | 0           |                |             |
| Bacteria.Proteobacteria.Deltaproteobacteria.unclassified_order                                              | 0           |                |             |
| Bacteria.Proteobacteria.Deltaproteobacteria.unclassified_order.unclassified_family                          | 0           |                |             |
| Bacteria.Proteobacteria.Deltaproteobacteria.unclassified_order.unclassified_family.unclassified_genus       | 0           |                |             |
| Bacteria.Proteobacteria.Epsilonproteobacteria                                                               | 3.945025614 |                |             |
| Bacteria.Proteobacteria.Epsilonproteobacteria.Campylobacteriales                                            | 3.945025614 |                |             |
| Bacteria.Proteobacteria.Epsilonproteobacteria.Campylobacteriales.Campylobacteraceae                         | 3.945025614 |                |             |
| Bacteria.Proteobacteria.Epsilonproteobacteria.Campylobacteriales.Campylobacteraceae.Arcobacter              | 3.945025614 |                |             |
| Bacteria.Proteobacteria.Epsilonproteobacteria.Campylobacteriales.Campylobacteraceae.Campylobacter           | 0           |                |             |
| Bacteria.Proteobacteria.Epsilonproteobacteria.Campylobacteriales.Campylobacteraceae.Sulfurospirillum        | 0           |                |             |
| Bacteria.Proteobacteria.Epsilonproteobacteria.Campylobacteriales.Helicobacteraceae                          | 0           |                |             |
| Bacteria.Proteobacteria.Epsilonproteobacteria.Campylobacteriales.Helicobacteraceae.Helicobacter             | 0           |                |             |
| Bacteria.Proteobacteria.Epsilonproteobacteria.unclassified_order                                            | 0           |                |             |
| Bacteria.Proteobacteria.Epsilonproteobacteria.unclassified_order.unclassified_family                        | 0           |                |             |
| Bacteria.Proteobacteria.Epsilonproteobacteria.unclassified_order.unclassified_family.unclassified_genus     | 0           |                |             |
| Bacteria.Proteobacteria.Gammaproteobacteria                                                                 | 5.278053005 |                |             |
| Bacteria.Proteobacteria.Gammaproteobacteria.Aeromonadales                                                   | 2.776244546 |                |             |
| Bacteria.Proteobacteria.Gammaproteobacteria.Aeromonadales.Aeromonadaceae                                    | 2.776244546 |                |             |
| Bacteria.Proteobacteria.Gammaproteobacteria.Aeromonadales.Aeromonadaceae.Aeromonas                          | 2.776244546 |                |             |
| Bacteria.Proteobacteria.Gammaproteobacteria.Aeromonadales.Aeromonadaceae.unclassified_genus                 | 0           |                |             |
| Bacteria.Proteobacteria.Gammaproteobacteria.Alteromonadales                                                 | 0           |                |             |
| Bacteria.Proteobacteria.Gammaproteobacteria.Alteromonadales.Shewanellaceae                                  | 0           |                |             |
| Bacteria.Proteobacteria.Gammaproteobacteria.Alteromonadales.Shewanellaceae.Shewanella                       | 0           |                |             |
| Bacteria.Proteobacteria.Gammaproteobacteria.Alteromonadales.unclassified_family                             | 0           |                |             |
| Bacteria.Proteobacteria.Gammaproteobacteria.Alteromonadales.unclassified_family.unclassified_genus          | 0           |                |             |
| Bacteria.Proteobacteria.Gammaproteobacteria.Chromatiales                                                    | 0           |                |             |
| Bacteria.Proteobacteria.Gammaproteobacteria.Chromatiales.Chromatiaceae                                      | 0           |                |             |
| Bacteria.Proteobacteria.Gammaproteobacteria.Chromatiales.Chromatiaceae.Rheinheimera                         | 0           |                |             |
| Bacteria.Proteobacteria.Gammaproteobacteria.Enterobacteriales                                               | 4.938503844 |                |             |
| Bacteria.Proteobacteria.Gammaproteobacteria.Enterobacteriales.Enterobacteriaceae                            | 4.938503844 |                |             |
| Bacteria.Proteobacteria.Gammaproteobacteria.Enterobacteriales.Enterobacteriaceae.Buttiauxella               | 0           |                |             |
| Bacteria.Proteobacteria.Gammaproteobacteria.Enterobacteriales.Enterobacteriaceae.Cedecea                    | 0           |                |             |
| Bacteria.Proteobacteria.Gammaproteobacteria.Enterobacteriales.Enterobacteriaceae.Citrobacter                | 4.63701801  |                |             |
| Bacteria.Proteobacteria.Gammaproteobacteria.Enterobacteriales.Enterobacteriaceae.Cronobacter                | 0           |                |             |
| Bacteria.Proteobacteria.Gammaproteobacteria.Enterobacteriales.Enterobacteriaceae.Enterobacter               | 0           |                |             |
| Bacteria.Proteobacteria.Gammaproteobacteria.Enterobacteriales.Enterobacteriaceae.Erwinia                    | 3.980292936 |                |             |
| Bacteria.Proteobacteria.Gammaproteobacteria.Enterobacteriales.Enterobacteriaceae.Escherichia_Shigella       | 3.675309782 |                |             |
| Bacteria.Proteobacteria.Gammaproteobacteria.Enterobacteriales.Enterobacteriaceae.Klebsiella                 | 3.731657654 |                |             |
| Bacteria.Proteobacteria.Gammaproteobacteria.Enterobacteriales.Enterobacteriaceae.Kluyvera                   | 0           |                |             |
| Bacteria.Proteobacteria.Gammaproteobacteria.Enterobacteriales.Enterobacteriaceae.Morganella                 | 0           |                |             |
| Bacteria.Proteobacteria.Gammaproteobacteria.Enterobacteriales.Enterobacteriaceae.Pantoea                    | 4.070492686 |                |             |
| Bacteria.Proteobacteria.Gammaproteobacteria.Enterobacteriales.Enterobacteriaceae.Raoultella                 | 0           |                |             |
| Bacteria.Proteobacteria.Gammaproteobacteria.Enterobacteriales.Enterobacteriaceae.Serratia                   | 3.475242752 |                |             |
| Bacteria.Proteobacteria.Gammaproteobacteria.Enterobacteriales.Enterobacteriaceae.Trabulsirella              | 0           |                |             |
| Bacteria.Proteobacteria.Gammaproteobacteria.Enterobacteriales.Enterobacteriaceae.unclassified_genus         | 4.070047454 | Fishmeal-based | 3.174289816 |
| Bacteria.Proteobacteria.Gammaproteobacteria.Enterobacteriales.Enterobacteriaceae.Yersinia                   | 0           |                |             |
| Bacteria.Proteobacteria.Gammaproteobacteria.Gammaproteobacteria_incertae_sedis                              | 2.776244546 |                |             |
| Bacteria.Proteobacteria.Gammaproteobacteria.Gammaproteobacteria_incertae_sedis.Solimonas                    | 2.776244546 |                |             |
| Bacteria.Proteobacteria.Gammaproteobacteria.Gammaproteobacteria_incertae_sedis.Solimonas.unclassified_genus | 2.776244546 |                |             |
| Bacteria.Proteobacteria.Gammaproteobacteria.Legionellales                                                   | 0           |                |             |
| Bacteria.Proteobacteria.Gammaproteobacteria.Legionellales.Coxiellaceae                                      | 0           |                |             |
| Bacteria.Proteobacteria.Gammaproteobacteria.Legionellales.Coxiellaceae.Aquicella                            | 0           |                |             |
| Bacteria.Proteobacteria.Gammaproteobacteria.Legionellales.Legionellaceae                                    | 0           |                |             |
| Bacteria.Proteobacteria.Gammaproteobacteria.Legionellales.Legionellaceae.Legionella                         | 0           |                |             |
| Bacteria.Proteobacteria.Gammaproteobacteria.Legionellales.Legionellaceae.unclassified_genus                 | 0           |                |             |
| Bacteria.Proteobacteria.Gammaproteobacteria.Oceanospirillales                                               | 0           |                |             |
| Bacteria.Proteobacteria.Gammaproteobacteria.Oceanospirillales.Halomonadaceae                                | 0           |                |             |
| Bacteria.Proteobacteria.Gammaproteobacteria.Oceanospirillales.Halomonadaceae.Halomonas                      | 0           |                |             |
| Bacteria.Proteobacteria.Gammaproteobacteria.Pasteurellales                                                  | 0           |                |             |
| Bacteria.Proteobacteria.Gammaproteobacteria.Pasteurellales.Pasteurellaceae                                  | 0           |                |             |
| Bacteria.Proteobacteria.Gammaproteobacteria.Pasteurellales.Pasteurellaceae.Actinobacillus                   | 0           |                |             |
| Bacteria.Proteobacteria.Gammaproteobacteria.Pasteurellales.Pasteurellaceae.Aggregatibacter                  | 0           |                |             |
| Bacteria.Proteobacteria.Gammaproteobacteria.Pasteurellales.Pasteurellaceae.Haemophilus                      | 0           |                |             |
| Bacteria.Proteobacteria.Gammaproteobacteria.Pasteurellales.Pasteurellaceae.Pasteurella                      | 0           |                |             |
| Bacteria.Proteobacteria.Gammaproteobacteria.Pasteurellales.Pasteurellaceae.unclassified_genus               | 0           |                |             |
| Bacteria.Proteobacteria.Gammaproteobacteria.Pseudomonadales                                                 | 5.009299231 |                |             |
| Bacteria.Proteobacteria.Gammaproteobacteria.Pseudomonadales.Moraxellaceae                                   | 4.872462513 |                |             |
| Bacteria.Proteobacteria.Gammaproteobacteria.Pseudomonadales.Moraxellaceae.Acinetobacter                     | 4.76593692  |                |             |
| Bacteria.Proteobacteria.Gammaproteobacteria.Pseudomonadales.Moraxellaceae.Alkanindiges                      | 0           |                |             |
| Bacteria.Proteobacteria.Gammaproteobacteria.Pseudomonadales.Moraxellaceae.Enhydrobacter                     | 3.946236603 |                |             |
| Bacteria.Proteobacteria.Gammaproteobacteria.Pseudomonadales.Moraxellaceae.Enhydrobacter                     | 0           |                |             |
| Bacteria.Proteobacteria.Gammaproteobacteria.Pseudomonadales.Moraxellaceae.Perlucciabaca                     | 0           |                |             |
| Bacteria.Proteobacteria.Gammaproteobacteria.Pseudomonadales.Moraxellaceae.Psychrobacter                     | 0           |                |             |
| Bacteria.Proteobacteria.Gammaproteobacteria.Pseudomonadales.Moraxellaceae.unclassified_genus                | 3.892085122 |                |             |
| Bacteria.Proteobacteria.Gammaproteobacteria.Pseudomonadales.Pseudomonadaceae                                | 4.446207288 |                |             |

|                                                                                                                     |             |  |
|---------------------------------------------------------------------------------------------------------------------|-------------|--|
| Bacteria.Proteobacteria.Gammaproteobacteria.Pseudomonadales.Pseudomonadaceae.Azorhizophilus                         | 0           |  |
| Bacteria.Proteobacteria.Gammaproteobacteria.Pseudomonadales.Pseudomonadaceae.CeIlivibrio                            | 0           |  |
| Bacteria.Proteobacteria.Gammaproteobacteria.Pseudomonadales.Pseudomonadaceae.Pseudomonas                            | 4.41048752  |  |
| Bacteria.Proteobacteria.Gammaproteobacteria.Pseudomonadales.Pseudomonadaceae.unclassified_genus                     | 3.34359413  |  |
| Bacteria.Proteobacteria.Gammaproteobacteria.Pseudomonadales.unclassified_family                                     | 0           |  |
| Bacteria.Proteobacteria.Gammaproteobacteria.Pseudomonadales.unclassified_family.unclassified_genus                  | 0           |  |
| Bacteria.Proteobacteria.Gammaproteobacteria.Salinisphaerales                                                        | 0           |  |
| Bacteria.Proteobacteria.Gammaproteobacteria.Salinisphaerales.Salinisphaeraceae                                      | 0           |  |
| Bacteria.Proteobacteria.Gammaproteobacteria.Salinisphaerales.Salinisphaeraceae.Salinisphaera                        | 0           |  |
| Bacteria.Proteobacteria.Gammaproteobacteria.unclassified_order                                                      | 0           |  |
| Bacteria.Proteobacteria.Gammaproteobacteria.unclassified_order.unclassified_family                                  | 0           |  |
| Bacteria.Proteobacteria.Gammaproteobacteria.unclassified_order.unclassified_family.unclassified_genus               | 0           |  |
| Bacteria.Proteobacteria.Gammaproteobacteria.Vibrionales                                                             | 0           |  |
| Bacteria.Proteobacteria.Gammaproteobacteria.Vibrionales.Vibrionaceae                                                | 0           |  |
| Bacteria.Proteobacteria.Gammaproteobacteria.Vibrionales.Vibrionaceae.Photobacterium                                 | 0           |  |
| Bacteria.Proteobacteria.Gammaproteobacteria.Vibrionales.Vibrionaceae.unclassified_genus                             | 0           |  |
| Bacteria.Proteobacteria.Gammaproteobacteria.Vibrionales.Vibrionaceae.Vibrio                                         | 0           |  |
| Bacteria.Proteobacteria.Gammaproteobacteria.Xanthomonadales                                                         | 2.864867349 |  |
| Bacteria.Proteobacteria.Gammaproteobacteria.Xanthomonadales.Sinobacteraceae                                         | 0           |  |
| Bacteria.Proteobacteria.Gammaproteobacteria.Xanthomonadales.Sinobacteraceae.Steroidobacter                          | 0           |  |
| Bacteria.Proteobacteria.Gammaproteobacteria.Xanthomonadales.Xanthomonadaceae                                        | 2.864867349 |  |
| Bacteria.Proteobacteria.Gammaproteobacteria.Xanthomonadales.Xanthomonadaceae.Lysobacter                             | 0           |  |
| Bacteria.Proteobacteria.Gammaproteobacteria.Xanthomonadales.Xanthomonadaceae.Pseudoxanthomonas                      | 0           |  |
| Bacteria.Proteobacteria.Gammaproteobacteria.Xanthomonadales.Xanthomonadaceae.Stenotrophomonas                       | 2.864867349 |  |
| Bacteria.Proteobacteria.Gammaproteobacteria.Xanthomonadales.Xanthomonadaceae.unclassified_genus                     | 0           |  |
| Bacteria.Proteobacteria.Gammaproteobacteria.Xanthomonadales.Xanthomonadaceae.Wohlfahrtiimonas                       | 0           |  |
| Bacteria.Proteobacteria.Gammaproteobacteria.Xanthomonadales.Xanthomonadaceae.Xanthomonas                            | 0           |  |
| Bacteria.Proteobacteria.unclassified_class                                                                          | 0           |  |
| Bacteria.Proteobacteria.unclassified_class.unclassified_order                                                       | 0           |  |
| Bacteria.Proteobacteria.unclassified_class.unclassified_order.unclassified_family                                   | 0           |  |
| Bacteria.Proteobacteria.unclassified_class.unclassified_order.unclassified_family.unclassified_genus                | 0           |  |
| Bacteria.Spirochaetes                                                                                               | 0           |  |
| Bacteria.Spirochaetes.Spirochaetes                                                                                  | 0           |  |
| Bacteria.Spirochaetes.Spirochaetes.Spirochaetales                                                                   | 0           |  |
| Bacteria.Spirochaetes.Spirochaetes.Spirochaetales.Spirochaetaceae                                                   | 0           |  |
| Bacteria.Spirochaetes.Spirochaetes.Spirochaetales.Spirochaetaceae.Treponema                                         | 0           |  |
| Bacteria.SR1                                                                                                        | 0           |  |
| Bacteria.SR1.SR1_genera_incertae_sedis                                                                              | 0           |  |
| Bacteria.SR1.SR1_genera_incertae_sedis.unclassified_order                                                           | 0           |  |
| Bacteria.SR1.SR1_genera_incertae_sedis.unclassified_order.unclassified_family                                       | 0           |  |
| Bacteria.SR1.SR1_genera_incertae_sedis.unclassified_order.unclassified_family.unclassified_genus                    | 0           |  |
| Bacteria.Synergistetes                                                                                              | 0           |  |
| Bacteria.Synergistetes.Synergistia                                                                                  | 0           |  |
| Bacteria.Synergistetes.Synergistia.Synergistales                                                                    | 0           |  |
| Bacteria.Synergistetes.Synergistia.Synergistales.Synergistaceae                                                     | 0           |  |
| Bacteria.Synergistetes.Synergistia.Synergistales.Synergistaceae.unclassified_genus                                  | 0           |  |
| Bacteria.Tenericutes                                                                                                | 0           |  |
| Bacteria.Tenericutes.Mollicutes                                                                                     | 0           |  |
| Bacteria.Tenericutes.Mollicutes.Anaeroplasmatales                                                                   | 0           |  |
| Bacteria.Tenericutes.Mollicutes.Anaeroplasmatales.Anaeroplasmataceae                                                | 0           |  |
| Bacteria.Tenericutes.Mollicutes.Anaeroplasmatales.Anaeroplasmataceae.Anaeroplasma                                   | 0           |  |
| Bacteria.Tenericutes.Mollicutes.Mycoplasmatales                                                                     | 0           |  |
| Bacteria.Tenericutes.Mollicutes.Mycoplasmatales.Mycoplasmataceae                                                    | 0           |  |
| Bacteria.Tenericutes.Mollicutes.Mycoplasmatales.Mycoplasmataceae.Mycoplasma                                         | 0           |  |
| Bacteria.TM7                                                                                                        | 0           |  |
| Bacteria.TM7.TM7_genera_incertae_sedis                                                                              | 0           |  |
| Bacteria.TM7.TM7_genera_incertae_sedis.unclassified_order                                                           | 0           |  |
| Bacteria.TM7.TM7_genera_incertae_sedis.unclassified_order.unclassified_family                                       | 0           |  |
| Bacteria.TM7.TM7_genera_incertae_sedis.unclassified_order.unclassified_family.unclassified_genus                    | 0           |  |
| Bacteria.unclassified_phylum                                                                                        | 4.208046356 |  |
| Bacteria.unclassified_phylum.unclassified_class                                                                     | 4.208046356 |  |
| Bacteria.unclassified_phylum.unclassified_class.unclassified_order                                                  | 4.208046356 |  |
| Bacteria.unclassified_phylum.unclassified_class.unclassified_order.unclassified_family                              | 4.208046356 |  |
| Bacteria.unclassified_phylum.unclassified_class.unclassified_order.unclassified_family.unclassified_genus           | 4.208046356 |  |
| Bacteria.Verrucomicrobia                                                                                            | 0           |  |
| Bacteria.Verrucomicrobia.Opitutae                                                                                   | 0           |  |
| Bacteria.Verrucomicrobia.Opitutales                                                                                 | 0           |  |
| Bacteria.Verrucomicrobia.Opitutales.Opitutaceae                                                                     | 0           |  |
| Bacteria.Verrucomicrobia.Opitutales.Opitutaceae.Opitutus                                                            | 0           |  |
| Bacteria.Verrucomicrobia.Spartobacteria                                                                             | 0           |  |
| Bacteria.Verrucomicrobia.Spartobacteria.Spartobacteria_genera_incertae_sedis                                        | 0           |  |
| Bacteria.Verrucomicrobia.Spartobacteria.Spartobacteria_genera_incertae_sedis.unclassified_family                    | 0           |  |
| Bacteria.Verrucomicrobia.Spartobacteria.Spartobacteria_genera_incertae_sedis.unclassified_family.unclassified_genus | 0           |  |
| Bacteria.Verrucomicrobia.unclassified_class                                                                         | 0           |  |
| Bacteria.Verrucomicrobia.unclassified_class.unclassified_order                                                      | 0           |  |
| Bacteria.Verrucomicrobia.unclassified_class.unclassified_order.unclassified_family                                  | 0           |  |
| Bacteria.Verrucomicrobia.unclassified_class.unclassified_order.unclassified_family.unclassified_genus               | 0           |  |
| Bacteria.Verrucomicrobia.Verrucomicrobiae                                                                           | 0           |  |
| Bacteria.Verrucomicrobia.Verrucomicrobiae.Verrucomicrobiales                                                        | 0           |  |
| Bacteria.Verrucomicrobia.Verrucomicrobiae.Verrucomicrobiales.Verrucomicrobiaceae                                    | 0           |  |
| Bacteria.Verrucomicrobia.Verrucomicrobiae.Verrucomicrobiales.Verrucomicrobiaceae.Akkermansia                        | 0           |  |

Footnotes:

1. Taxonomic assignment determined using RDP classifier to compare a representative sequence from each OTU to reference sequences in the greengenes database.



|                                                                                                 |             |  |
|-------------------------------------------------------------------------------------------------|-------------|--|
| Bacteria.Actinobacteria.Actinobacteria.Actinomycetales.Intrasporangiaceae.Knoellia              | 0           |  |
| Bacteria.Actinobacteria.Actinobacteria.Actinomycetales.Intrasporangiaceae.Ornithinimicrobium    | 0           |  |
| Bacteria.Actinobacteria.Actinobacteria.Actinomycetales.Intrasporangiaceae.Tetrasphaera          | 0           |  |
| Bacteria.Actinobacteria.Actinobacteria.Actinomycetales.Intrasporangiaceae.unclassified_genus    | 0           |  |
| Bacteria.Actinobacteria.Actinobacteria.Actinomycetales.Jonesiaceae                              | 0           |  |
| Bacteria.Actinobacteria.Actinobacteria.Actinomycetales.Jonesiaceae.Jonesia                      | 0           |  |
| Bacteria.Actinobacteria.Actinobacteria.Actinomycetales.Microbacteriaceae                        | 0           |  |
| Bacteria.Actinobacteria.Actinobacteria.Actinomycetales.Microbacteriaceae.Agrococcus             | 0           |  |
| Bacteria.Actinobacteria.Actinobacteria.Actinomycetales.Microbacteriaceae.Clavibacter            | 0           |  |
| Bacteria.Actinobacteria.Actinobacteria.Actinomycetales.Microbacteriaceae.Curtobacterium         | 0           |  |
| Bacteria.Actinobacteria.Actinobacteria.Actinomycetales.Microbacteriaceae.Frigoribacterium       | 0           |  |
| Bacteria.Actinobacteria.Actinobacteria.Actinomycetales.Microbacteriaceae.Leifsonia              | 0           |  |
| Bacteria.Actinobacteria.Actinobacteria.Actinomycetales.Microbacteriaceae.Leucobacter            | 0           |  |
| Bacteria.Actinobacteria.Actinobacteria.Actinomycetales.Microbacteriaceae.Microbacterium         | 0           |  |
| Bacteria.Actinobacteria.Actinobacteria.Actinomycetales.Microbacteriaceae.Plantibacter           | 0           |  |
| Bacteria.Actinobacteria.Actinobacteria.Actinomycetales.Microbacteriaceae.Pseudoclavibacter      | 0           |  |
| Bacteria.Actinobacteria.Actinobacteria.Actinomycetales.Microbacteriaceae.unclassified_genus     | 0           |  |
| Bacteria.Actinobacteria.Actinobacteria.Actinomycetales.Micrococcaceae                           | 3.086716098 |  |
| Bacteria.Actinobacteria.Actinobacteria.Actinomycetales.Micrococcaceae.Arthrobacter              | 3.086716098 |  |
| Bacteria.Actinobacteria.Actinobacteria.Actinomycetales.Micrococcaceae.Kocuria                   | 0           |  |
| Bacteria.Actinobacteria.Actinobacteria.Actinomycetales.Micrococcaceae.Micrococcus               | 0           |  |
| Bacteria.Actinobacteria.Actinobacteria.Actinomycetales.Micrococcaceae.Nesterenkonia             | 0           |  |
| Bacteria.Actinobacteria.Actinobacteria.Actinomycetales.Micrococcaceae.Rothia                    | 0           |  |
| Bacteria.Actinobacteria.Actinobacteria.Actinomycetales.Micrococcaceae.unclassified_genus        | 0           |  |
| Bacteria.Actinobacteria.Actinobacteria.Actinomycetales.Micromonosporaceae                       | 0           |  |
| Bacteria.Actinobacteria.Actinobacteria.Actinomycetales.Micromonosporaceae.Luedemannella         | 0           |  |
| Bacteria.Actinobacteria.Actinobacteria.Actinomycetales.Micromonosporaceae.Micromonospora        | 0           |  |
| Bacteria.Actinobacteria.Actinobacteria.Actinomycetales.Mycobacteriaceae                         | 0           |  |
| Bacteria.Actinobacteria.Actinobacteria.Actinomycetales.Mycobacteriaceae.Mycobacterium           | 0           |  |
| Bacteria.Actinobacteria.Actinobacteria.Actinomycetales.Nocardiaceae                             | 0           |  |
| Bacteria.Actinobacteria.Actinobacteria.Actinomycetales.Nocardiaceae.Gordonia                    | 0           |  |
| Bacteria.Actinobacteria.Actinobacteria.Actinomycetales.Nocardiaceae.Rhodococcus                 | 0           |  |
| Bacteria.Actinobacteria.Actinobacteria.Actinomycetales.Nocardiaceae.unclassified_genus          | 0           |  |
| Bacteria.Actinobacteria.Actinobacteria.Actinomycetales.Nocardiaceae.Williamsia                  | 0           |  |
| Bacteria.Actinobacteria.Actinobacteria.Actinomycetales.Nocardioideae                            | 0           |  |
| Bacteria.Actinobacteria.Actinobacteria.Actinomycetales.Nocardioideae.Aeromicrobium              | 0           |  |
| Bacteria.Actinobacteria.Actinobacteria.Actinomycetales.Nocardioideae.Marmoricola                | 0           |  |
| Bacteria.Actinobacteria.Actinobacteria.Actinomycetales.Nocardioideae.Nocardioides               | 0           |  |
| Bacteria.Actinobacteria.Actinobacteria.Actinomycetales.Nocardioideae.Pimelobacter               | 0           |  |
| Bacteria.Actinobacteria.Actinobacteria.Actinomycetales.Nocardioideae.unclassified_genus         | 0           |  |
| Bacteria.Actinobacteria.Actinobacteria.Actinomycetales.Nocardioisaceae                          | 0           |  |
| Bacteria.Actinobacteria.Actinobacteria.Actinomycetales.Nocardioisaceae.Nocardioisopsis          | 0           |  |
| Bacteria.Actinobacteria.Actinobacteria.Actinomycetales.Nocardioisaceae.unclassified_genus       | 0           |  |
| Bacteria.Actinobacteria.Actinobacteria.Actinomycetales.Propionibacteriaceae                     | 0           |  |
| Bacteria.Actinobacteria.Actinobacteria.Actinomycetales.Propionibacteriaceae.Friedmanniella      | 0           |  |
| Bacteria.Actinobacteria.Actinobacteria.Actinomycetales.Propionibacteriaceae.Microlunatus        | 0           |  |
| Bacteria.Actinobacteria.Actinobacteria.Actinomycetales.Propionibacteriaceae.Propionibacterium   | 0           |  |
| Bacteria.Actinobacteria.Actinobacteria.Actinomycetales.Propionibacteriaceae.unclassified_genus  | 0           |  |
| Bacteria.Actinobacteria.Actinobacteria.Actinomycetales.Pseudonocardiaceae                       | 0           |  |
| Bacteria.Actinobacteria.Actinobacteria.Actinomycetales.Pseudonocardiaceae.Pseudonocardia        | 0           |  |
| Bacteria.Actinobacteria.Actinobacteria.Actinomycetales.Pseudonocardiaceae.Saccharopolyspora     | 0           |  |
| Bacteria.Actinobacteria.Actinobacteria.Actinomycetales.Pseudonocardiaceae.unclassified_genus    | 0           |  |
| Bacteria.Actinobacteria.Actinobacteria.Actinomycetales.Sanguibacteraceae                        | 0           |  |
| Bacteria.Actinobacteria.Actinobacteria.Actinomycetales.Sanguibacteraceae.Sanguibacter           | 0           |  |
| Bacteria.Actinobacteria.Actinobacteria.Actinomycetales.Streptomycetaceae                        | 0           |  |
| Bacteria.Actinobacteria.Actinobacteria.Actinomycetales.Streptomycetaceae.Streptomyces           | 0           |  |
| Bacteria.Actinobacteria.Actinobacteria.Actinomycetales.Streptomycetaceae.unclassified_genus     | 0           |  |
| Bacteria.Actinobacteria.Actinobacteria.Actinomycetales.unclassified_family                      | 0           |  |
| Bacteria.Actinobacteria.Actinobacteria.Actinomycetales.unclassified_family.unclassified_genus   | 0           |  |
| Bacteria.Actinobacteria.Actinobacteria.Actinomycetales.Yaniellaceae                             | 0           |  |
| Bacteria.Actinobacteria.Actinobacteria.Actinomycetales.Yaniellaceae.Yaniella                    | 0           |  |
| Bacteria.Actinobacteria.Actinobacteria.Bifidobacteriales                                        | 0           |  |
| Bacteria.Actinobacteria.Actinobacteria.Bifidobacteriales.Bifidobacteriaceae                     | 0           |  |
| Bacteria.Actinobacteria.Actinobacteria.Bifidobacteriales.Bifidobacteriaceae.Aeriscardovia       | 0           |  |
| Bacteria.Actinobacteria.Actinobacteria.Bifidobacteriales.Bifidobacteriaceae.Bifidobacterium     | 0           |  |
| Bacteria.Actinobacteria.Actinobacteria.Bifidobacteriales.Bifidobacteriaceae.unclassified_genus  | 0           |  |
| Bacteria.Actinobacteria.Actinobacteria.Coriobacteriales                                         | 0           |  |
| Bacteria.Actinobacteria.Actinobacteria.Coriobacteriales.Coriobacteriaceae                       | 0           |  |
| Bacteria.Actinobacteria.Actinobacteria.Coriobacteriales.Coriobacteriaceae.Asaccharobacter       | 0           |  |
| Bacteria.Actinobacteria.Actinobacteria.Coriobacteriales.Coriobacteriaceae.Atopobium             | 0           |  |
| Bacteria.Actinobacteria.Actinobacteria.Coriobacteriales.Coriobacteriaceae.Collinsella           | 0           |  |
| Bacteria.Actinobacteria.Actinobacteria.Coriobacteriales.Coriobacteriaceae.Eggerthella           | 0           |  |
| Bacteria.Actinobacteria.Actinobacteria.Coriobacteriales.Coriobacteriaceae.Olsenella             | 0           |  |
| Bacteria.Actinobacteria.Actinobacteria.Coriobacteriales.Coriobacteriaceae.Paraeggerthella       | 0           |  |
| Bacteria.Actinobacteria.Actinobacteria.Coriobacteriales.Coriobacteriaceae.unclassified_genus    | 0           |  |
| Bacteria.Actinobacteria.Actinobacteria.Rubrobacterales                                          | 0           |  |
| Bacteria.Actinobacteria.Actinobacteria.Rubrobacterales.Rubrobacteraceae                         | 0           |  |
| Bacteria.Actinobacteria.Actinobacteria.Rubrobacterales.Rubrobacteraceae.Rubrobacter             | 0           |  |
| Bacteria.Actinobacteria.Actinobacteria.Solirubrobacterales                                      | 0           |  |
| Bacteria.Actinobacteria.Actinobacteria.Solirubrobacterales.Conexibacteraceae                    | 0           |  |
| Bacteria.Actinobacteria.Actinobacteria.Solirubrobacterales.Conexibacteraceae.Conexibacter       | 0           |  |
| Bacteria.Actinobacteria.Actinobacteria.Solirubrobacterales.Solirubrobacteraceae                 | 0           |  |
| Bacteria.Actinobacteria.Actinobacteria.Solirubrobacterales.Solirubrobacteraceae.Solirubrobacter | 0           |  |

|                                                                                                     |             |     |             |
|-----------------------------------------------------------------------------------------------------|-------------|-----|-------------|
| Bacteria.Actinobacteria.Actinobacteria.Solirubrobacterales.unclassified_family                      | 0           |     |             |
| Bacteria.Actinobacteria.Actinobacteria.Solirubrobacterales.unclassified_family.unclassified_genus   | 0           |     |             |
| Bacteria.Actinobacteria.Actinobacteria.unclassified_order                                           | 0           |     |             |
| Bacteria.Actinobacteria.Actinobacteria.unclassified_order.unclassified_family                       | 0           |     |             |
| Bacteria.Actinobacteria.Actinobacteria.unclassified_order.unclassified_family.unclassified_genus    | 0           |     |             |
| Bacteria.Aquificae                                                                                  | 0           |     |             |
| Bacteria.Aquificae.Aquificae                                                                        | 0           |     |             |
| Bacteria.Aquificae.Aquificae.Aquificales                                                            | 0           |     |             |
| Bacteria.Aquificae.Aquificae.Aquificales.Hydrogenothermaceae                                        | 0           |     |             |
| Bacteria.Aquificae.Aquificae.Aquificales.Hydrogenothermaceae.Sulfurihydrogenibium                   | 0           |     |             |
| Bacteria.Bacteroidetes                                                                              | 4.384138033 | Low | 4.083595992 |
| Bacteria.Bacteroidetes.Bacteroidia                                                                  | 3.262842323 |     |             |
| Bacteria.Bacteroidetes.Bacteroidia.Bacteroidales                                                    | 3.262842323 |     |             |
| Bacteria.Bacteroidetes.Bacteroidia.Bacteroidales.Bacteroidaceae                                     | 2.780939668 |     |             |
| Bacteria.Bacteroidetes.Bacteroidia.Bacteroidales.Bacteroidaceae.Bacteroides                         | 2.780939668 |     |             |
| Bacteria.Bacteroidetes.Bacteroidia.Bacteroidales.Porphyrimonadaceae                                 | 3.089122168 |     |             |
| Bacteria.Bacteroidetes.Bacteroidia.Bacteroidales.Porphyrimonadaceae.Dyssonomonas                    | 0           |     |             |
| Bacteria.Bacteroidetes.Bacteroidia.Bacteroidales.Porphyrimonadaceae.Porphyrimonas                   | 0           |     |             |
| Bacteria.Bacteroidetes.Bacteroidia.Bacteroidales.Porphyrimonadaceae.Proteiniphilum                  | 0           |     |             |
| Bacteria.Bacteroidetes.Bacteroidia.Bacteroidales.Porphyrimonadaceae.unclassified_genus              | 3.089122168 |     |             |
| Bacteria.Bacteroidetes.Bacteroidia.Bacteroidales.Prevotellaceae                                     | 0           |     |             |
| Bacteria.Bacteroidetes.Bacteroidia.Bacteroidales.Prevotellaceae.Hallella                            | 0           |     |             |
| Bacteria.Bacteroidetes.Bacteroidia.Bacteroidales.Prevotellaceae.Prevotella                          | 0           |     |             |
| Bacteria.Bacteroidetes.Bacteroidia.Bacteroidales.Prevotellaceae.unclassified_genus                  | 0           |     |             |
| Bacteria.Bacteroidetes.Bacteroidia.Bacteroidales.unclassified_family                                | 0           |     |             |
| Bacteria.Bacteroidetes.Bacteroidia.Bacteroidales.unclassified_family.unclassified_genus             | 0           |     |             |
| Bacteria.Bacteroidetes.Flavobacteria                                                                | 4.244358215 |     |             |
| Bacteria.Bacteroidetes.Flavobacteria.Flavobacteriales                                               | 4.244358215 |     |             |
| Bacteria.Bacteroidetes.Flavobacteria.Flavobacteriales.Cryomorpaceae                                 | 0           |     |             |
| Bacteria.Bacteroidetes.Flavobacteria.Flavobacteriales.Cryomorpaceae.Fluvicola                       | 0           |     |             |
| Bacteria.Bacteroidetes.Flavobacteria.Flavobacteriales.Flavobacteriaceae                             | 4.244358215 |     |             |
| Bacteria.Bacteroidetes.Flavobacteria.Flavobacteriales.Flavobacteriaceae.Capnocytophaga              | 0           |     |             |
| Bacteria.Bacteroidetes.Flavobacteria.Flavobacteriales.Flavobacteriaceae.Chryseobacterium            | 4.065925478 |     |             |
| Bacteria.Bacteroidetes.Flavobacteria.Flavobacteriales.Flavobacteriaceae.Cloacibacterium             | 3.733875042 |     |             |
| Bacteria.Bacteroidetes.Flavobacteria.Flavobacteriales.Flavobacteriaceae.Flavobacterium              | 3.082020977 |     |             |
| Bacteria.Bacteroidetes.Flavobacteria.Flavobacteriales.Flavobacteriaceae.Myroides                    | 0           |     |             |
| Bacteria.Bacteroidetes.Flavobacteria.Flavobacteriales.Flavobacteriaceae.Riemerella                  | 0           |     |             |
| Bacteria.Bacteroidetes.Flavobacteria.Flavobacteriales.Flavobacteriaceae.Salinimicrobium             | 0           |     |             |
| Bacteria.Bacteroidetes.Flavobacteria.Flavobacteriales.Flavobacteriaceae.unclassified_genus          | 0           |     |             |
| Bacteria.Bacteroidetes.Flavobacteria.Flavobacteriales.Flavobacteriaceae.Wautersiella                | 0           |     |             |
| Bacteria.Bacteroidetes.Flavobacteria.Flavobacteriales.unclassified_family                           | 0           |     |             |
| Bacteria.Bacteroidetes.Flavobacteria.Flavobacteriales.unclassified_family.unclassified_genus        | 0           |     |             |
| Bacteria.Bacteroidetes.Sphingobacteria                                                              | 3.684222177 |     |             |
| Bacteria.Bacteroidetes.Sphingobacteria.Sphingobacteriales                                           | 3.684222177 |     |             |
| Bacteria.Bacteroidetes.Sphingobacteria.Sphingobacteriales.Chitinophagaceae                          | 0           |     |             |
| Bacteria.Bacteroidetes.Sphingobacteria.Sphingobacteriales.Chitinophagaceae.Ferruginibacter          | 0           |     |             |
| Bacteria.Bacteroidetes.Sphingobacteria.Sphingobacteriales.Chitinophagaceae.Filimonas                | 0           |     |             |
| Bacteria.Bacteroidetes.Sphingobacteria.Sphingobacteriales.Chitinophagaceae.Flavisolibacter          | 0           |     |             |
| Bacteria.Bacteroidetes.Sphingobacteria.Sphingobacteriales.Chitinophagaceae.unclassified_genus       | 0           |     |             |
| Bacteria.Bacteroidetes.Sphingobacteria.Sphingobacteriales.Cytophagaceae                             | 3.476364159 |     |             |
| Bacteria.Bacteroidetes.Sphingobacteria.Sphingobacteriales.Cytophagaceae.Adhaeribacter               | 0           |     |             |
| Bacteria.Bacteroidetes.Sphingobacteria.Sphingobacteriales.Cytophagaceae.Cytophaga                   | 0           |     |             |
| Bacteria.Bacteroidetes.Sphingobacteria.Sphingobacteriales.Cytophagaceae.Dyadobacter                 | 0           |     |             |
| Bacteria.Bacteroidetes.Sphingobacteria.Sphingobacteriales.Cytophagaceae.Emticicia                   | 0           |     |             |
| Bacteria.Bacteroidetes.Sphingobacteria.Sphingobacteriales.Cytophagaceae.Flectobacillus              | 3.476364159 |     |             |
| Bacteria.Bacteroidetes.Sphingobacteria.Sphingobacteriales.Cytophagaceae.Hymenobacter                | 0           |     |             |
| Bacteria.Bacteroidetes.Sphingobacteria.Sphingobacteriales.Cytophagaceae.Pontibacter                 | 0           |     |             |
| Bacteria.Bacteroidetes.Sphingobacteria.Sphingobacteriales.Cytophagaceae.Runella                     | 0           |     |             |
| Bacteria.Bacteroidetes.Sphingobacteria.Sphingobacteriales.Cytophagaceae.Sporocytophaga              | 0           |     |             |
| Bacteria.Bacteroidetes.Sphingobacteria.Sphingobacteriales.Cytophagaceae.unclassified_genus          | 0           |     |             |
| Bacteria.Bacteroidetes.Sphingobacteria.Sphingobacteriales.Sphingobacteriaceae                       | 3.264412884 |     |             |
| Bacteria.Bacteroidetes.Sphingobacteria.Sphingobacteriales.Sphingobacteriaceae.Nubsella              | 0           |     |             |
| Bacteria.Bacteroidetes.Sphingobacteria.Sphingobacteriales.Sphingobacteriaceae.Pedobacter            | 0           |     |             |
| Bacteria.Bacteroidetes.Sphingobacteria.Sphingobacteriales.Sphingobacteriaceae.Sphingobacterium      | 3.264412884 |     |             |
| Bacteria.Bacteroidetes.Sphingobacteria.Sphingobacteriales.Sphingobacteriaceae.unclassified_genus    | 0           |     |             |
| Bacteria.Bacteroidetes.Sphingobacteria.Sphingobacteriales.unclassified_family                       | 0           |     |             |
| Bacteria.Bacteroidetes.Sphingobacteria.Sphingobacteriales.unclassified_family.unclassified_genus    | 0           |     |             |
| Bacteria.Bacteroidetes.unclassified_class                                                           | 0           |     |             |
| Bacteria.Bacteroidetes.unclassified_class.unclassified_order                                        | 0           |     |             |
| Bacteria.Bacteroidetes.unclassified_class.unclassified_order.unclassified_family                    | 0           |     |             |
| Bacteria.Bacteroidetes.unclassified_class.unclassified_order.unclassified_family.unclassified_genus | 0           |     |             |
| Bacteria.Chloroflexi                                                                                | 0           |     |             |
| Bacteria.Chloroflexi.Anaerolineae                                                                   | 0           |     |             |
| Bacteria.Chloroflexi.Anaerolineae.Anaerolineales                                                    | 0           |     |             |
| Bacteria.Chloroflexi.Anaerolineae.Anaerolineales.Anaerolineaceae                                    | 0           |     |             |
| Bacteria.Chloroflexi.Anaerolineae.Anaerolineales.Anaerolineaceae.unclassified_genus                 | 0           |     |             |
| Bacteria.Chloroflexi.Caldilineae                                                                    | 0           |     |             |
| Bacteria.Chloroflexi.Caldilineae.Caldilineales                                                      | 0           |     |             |
| Bacteria.Chloroflexi.Caldilineae.Caldilineales.Caldilineaceae                                       | 0           |     |             |
| Bacteria.Chloroflexi.Caldilineae.Caldilineales.Caldilineaceae.Caldilinea                            | 0           |     |             |
| Bacteria.Chloroflexi.Thermomicrobia                                                                 | 0           |     |             |
| Bacteria.Chloroflexi.Thermomicrobia.Sphaerobacterales                                               | 0           |     |             |
| Bacteria.Chloroflexi.Thermomicrobia.Sphaerobacterales.Sphaerobacteraceae                            | 0           |     |             |
| Bacteria.Chloroflexi.Thermomicrobia.Sphaerobacterales.Sphaerobacteraceae.Sphaerobacter              | 0           |     |             |

|                                                                                                   |             |  |
|---------------------------------------------------------------------------------------------------|-------------|--|
| Bacteria.Chloroflexi.Thermomicrobia.unclassified_order                                            | 0           |  |
| Bacteria.Chloroflexi.Thermomicrobia.unclassified_order.unclassified_family                        | 0           |  |
| Bacteria.Chloroflexi.Thermomicrobia.unclassified_order.unclassified_family.unclassified_genus     | 0           |  |
| Bacteria.Chloroflexi.unclassified_class                                                           | 0           |  |
| Bacteria.Chloroflexi.unclassified_class.unclassified_order                                        | 0           |  |
| Bacteria.Chloroflexi.unclassified_class.unclassified_order.unclassified_family                    | 0           |  |
| Bacteria.Chloroflexi.unclassified_class.unclassified_order.unclassified_family.unclassified_genus | 0           |  |
| Bacteria.Deinococcus_Thermus                                                                      | 0           |  |
| Bacteria.Deinococcus_Thermus.Deinococci                                                           | 0           |  |
| Bacteria.Deinococcus_Thermus.Deinococci.Deinococcales                                             | 0           |  |
| Bacteria.Deinococcus_Thermus.Deinococci.Deinococcales.Deinococcaceae                              | 0           |  |
| Bacteria.Deinococcus_Thermus.Deinococci.Deinococcales.Deinococcaceae.Deinococcus                  | 0           |  |
| Bacteria.Deinococcus_Thermus.Deinococci.Deinococcales.Trueperaceae                                | 0           |  |
| Bacteria.Deinococcus_Thermus.Deinococci.Deinococcales.Trueperaceae.Truepera                       | 0           |  |
| Bacteria.Deinococcus_Thermus.Deinococci.Thermales                                                 | 0           |  |
| Bacteria.Deinococcus_Thermus.Deinococci.Thermales.Thermaceae                                      | 0           |  |
| Bacteria.Deinococcus_Thermus.Deinococci.Thermales.Thermaceae.Meiothermus                          | 0           |  |
| Bacteria.Deinococcus_Thermus.Deinococci.unclassified_order                                        | 0           |  |
| Bacteria.Deinococcus_Thermus.Deinococci.unclassified_order.unclassified_family                    | 0           |  |
| Bacteria.Deinococcus_Thermus.Deinococci.unclassified_order.unclassified_family.unclassified_genus | 0           |  |
| Bacteria.Firmicutes                                                                               | 5.72482952  |  |
| Bacteria.Firmicutes.Bacilli                                                                       | 5.713264652 |  |
| Bacteria.Firmicutes.Bacilli.Bacillales                                                            | 4.144448578 |  |
| Bacteria.Firmicutes.Bacilli.Bacillales.Alicyclobacillaceae                                        | 0           |  |
| Bacteria.Firmicutes.Bacilli.Bacillales.Alicyclobacillaceae.Alicyclobacillus                       | 0           |  |
| Bacteria.Firmicutes.Bacilli.Bacillales.Bacillaceae                                                | 4.039227169 |  |
| Bacteria.Firmicutes.Bacilli.Bacillales.Bacillaceae.Anoxybacillus                                  | 0           |  |
| Bacteria.Firmicutes.Bacilli.Bacillales.Bacillaceae.Bacillus                                       | 3.92992552  |  |
| Bacteria.Firmicutes.Bacilli.Bacillales.Bacillaceae.Caldalkalibacillus                             | 0           |  |
| Bacteria.Firmicutes.Bacilli.Bacillales.Bacillaceae.Cerasibacillus                                 | 0           |  |
| Bacteria.Firmicutes.Bacilli.Bacillales.Bacillaceae.Exiguobacterium                                | 2.785686103 |  |
| Bacteria.Firmicutes.Bacilli.Bacillales.Bacillaceae.Geobacillus                                    | 0           |  |
| Bacteria.Firmicutes.Bacilli.Bacillales.Bacillaceae.Gracilibacillus                                | 0           |  |
| Bacteria.Firmicutes.Bacilli.Bacillales.Bacillaceae.Lentibacillus                                  | 0           |  |
| Bacteria.Firmicutes.Bacilli.Bacillales.Bacillaceae.Lysinibacillus                                 | 0           |  |
| Bacteria.Firmicutes.Bacilli.Bacillales.Bacillaceae.Oceanobacillus                                 | 0           |  |
| Bacteria.Firmicutes.Bacilli.Bacillales.Bacillaceae.Ornithinibacillus                              | 0           |  |
| Bacteria.Firmicutes.Bacilli.Bacillales.Bacillaceae.Tenuibacillus                                  | 0           |  |
| Bacteria.Firmicutes.Bacilli.Bacillales.Bacillaceae.Terribacillus                                  | 0           |  |
| Bacteria.Firmicutes.Bacilli.Bacillales.Bacillaceae.Tumebacillus                                   | 0           |  |
| Bacteria.Firmicutes.Bacilli.Bacillales.Bacillaceae.unclassified_genus                             | 3.261230969 |  |
| Bacteria.Firmicutes.Bacilli.Bacillales.Bacillaceae.Ureibacillus                                   | 0           |  |
| Bacteria.Firmicutes.Bacilli.Bacillales.Bacillaceae.Virgibacillus                                  | 0           |  |
| Bacteria.Firmicutes.Bacilli.Bacillales.Bacillales_incertae_sedis                                  | 0           |  |
| Bacteria.Firmicutes.Bacilli.Bacillales.Bacillales_incertae_sedis.Rummeliibacillus                 | 0           |  |
| Bacteria.Firmicutes.Bacilli.Bacillales.Bacillales_incertae_sedis.Solibacillus                     | 0           |  |
| Bacteria.Firmicutes.Bacilli.Bacillales.Listeriaceae                                               | 0           |  |
| Bacteria.Firmicutes.Bacilli.Bacillales.Listeriaceae.Brochothrix                                   | 0           |  |
| Bacteria.Firmicutes.Bacilli.Bacillales.Listeriaceae.Listeria                                      | 0           |  |
| Bacteria.Firmicutes.Bacilli.Bacillales.Paenibacillaceae                                           | 0           |  |
| Bacteria.Firmicutes.Bacilli.Bacillales.Paenibacillaceae.Ammoniphilus                              | 0           |  |
| Bacteria.Firmicutes.Bacilli.Bacillales.Paenibacillaceae.Aneurinibacillus                          | 0           |  |
| Bacteria.Firmicutes.Bacilli.Bacillales.Paenibacillaceae.Brevibacillus                             | 0           |  |
| Bacteria.Firmicutes.Bacilli.Bacillales.Paenibacillaceae.Cohnella                                  | 0           |  |
| Bacteria.Firmicutes.Bacilli.Bacillales.Paenibacillaceae.Oxalophagus                               | 0           |  |
| Bacteria.Firmicutes.Bacilli.Bacillales.Paenibacillaceae.Paenibacillus                             | 0           |  |
| Bacteria.Firmicutes.Bacilli.Bacillales.Paenibacillaceae.Saccharibacillus                          | 0           |  |
| Bacteria.Firmicutes.Bacilli.Bacillales.Paenibacillaceae.unclassified_genus                        | 0           |  |
| Bacteria.Firmicutes.Bacilli.Bacillales.Planococcaceae                                             | 0           |  |
| Bacteria.Firmicutes.Bacilli.Bacillales.Planococcaceae.Bhargavaea                                  | 0           |  |
| Bacteria.Firmicutes.Bacilli.Bacillales.Planococcaceae.Kurthia                                     | 0           |  |
| Bacteria.Firmicutes.Bacilli.Bacillales.Planococcaceae.Planococcus                                 | 0           |  |
| Bacteria.Firmicutes.Bacilli.Bacillales.Planococcaceae.Planomicrobium                              | 0           |  |
| Bacteria.Firmicutes.Bacilli.Bacillales.Planococcaceae.Sporosarcina                                | 0           |  |
| Bacteria.Firmicutes.Bacilli.Bacillales.Planococcaceae.unclassified_genus                          | 0           |  |
| Bacteria.Firmicutes.Bacilli.Bacillales.Staphylococcaceae                                          | 3.477219369 |  |
| Bacteria.Firmicutes.Bacilli.Bacillales.Staphylococcaceae.Gemella                                  | 0           |  |
| Bacteria.Firmicutes.Bacilli.Bacillales.Staphylococcaceae.Jeotgalicoccus                           | 0           |  |
| Bacteria.Firmicutes.Bacilli.Bacillales.Staphylococcaceae.Macroccoccus                             | 0           |  |
| Bacteria.Firmicutes.Bacilli.Bacillales.Staphylococcaceae.Nosocomiicoccus                          | 0           |  |
| Bacteria.Firmicutes.Bacilli.Bacillales.Staphylococcaceae.Salinococcus                             | 0           |  |
| Bacteria.Firmicutes.Bacilli.Bacillales.Staphylococcaceae.Staphylococcus                           | 3.477219369 |  |
| Bacteria.Firmicutes.Bacilli.Bacillales.Thermoactinomycetaceae                                     | 0           |  |
| Bacteria.Firmicutes.Bacilli.Bacillales.Thermoactinomycetaceae.Thermoactinomyces                   | 0           |  |
| Bacteria.Firmicutes.Bacilli.Bacillales.Thermoactinomycetaceae.unclassified_genus                  | 0           |  |
| Bacteria.Firmicutes.Bacilli.Bacillales.unclassified_family                                        | 0           |  |
| Bacteria.Firmicutes.Bacilli.Bacillales.unclassified_family.unclassified_genus                     | 0           |  |
| Bacteria.Firmicutes.Bacilli.Lactobacillales                                                       | 5.705255566 |  |
| Bacteria.Firmicutes.Bacilli.Lactobacillales.Aerococcaceae                                         | 0           |  |
| Bacteria.Firmicutes.Bacilli.Lactobacillales.Aerococcaceae.Abiotrophia                             | 0           |  |
| Bacteria.Firmicutes.Bacilli.Lactobacillales.Aerococcaceae.Aerococcus                              | 0           |  |
| Bacteria.Firmicutes.Bacilli.Lactobacillales.Aerococcaceae.Eremococcus                             | 0           |  |
| Bacteria.Firmicutes.Bacilli.Lactobacillales.Aerococcaceae.Globicatella                            | 0           |  |
| Bacteria.Firmicutes.Bacilli.Lactobacillales.Carnobacteriaceae                                     | 4.392186894 |  |

|                                                                                       |             |  |
|---------------------------------------------------------------------------------------|-------------|--|
| Bacteria.Firmicutes.Bacilli.Lactobacillales.Carnobacteriaceae.Atopostipes             | 0           |  |
| Bacteria.Firmicutes.Bacilli.Lactobacillales.Carnobacteriaceae.Carnobacterium          | 4.392186894 |  |
| Bacteria.Firmicutes.Bacilli.Lactobacillales.Carnobacteriaceae.Desemzia                | 0           |  |
| Bacteria.Firmicutes.Bacilli.Lactobacillales.Carnobacteriaceae.Granulicatella          | 0           |  |
| Bacteria.Firmicutes.Bacilli.Lactobacillales.Carnobacteriaceae.Marinilactibacillus     | 0           |  |
| Bacteria.Firmicutes.Bacilli.Lactobacillales.Carnobacteriaceae.Trichococcus            | 0           |  |
| Bacteria.Firmicutes.Bacilli.Lactobacillales.Carnobacteriaceae.unclassified_genus      | 0           |  |
| Bacteria.Firmicutes.Bacilli.Lactobacillales.Enterococcaceae                           | 4.038318754 |  |
| Bacteria.Firmicutes.Bacilli.Lactobacillales.Enterococcaceae.Enterococcus              | 4.038318754 |  |
| Bacteria.Firmicutes.Bacilli.Lactobacillales.Enterococcaceae.unclassified_genus        | 0           |  |
| Bacteria.Firmicutes.Bacilli.Lactobacillales.Enterococcaceae.Vagococcus                | 0           |  |
| Bacteria.Firmicutes.Bacilli.Lactobacillales.Lactobacillaceae                          | 4.006041764 |  |
| Bacteria.Firmicutes.Bacilli.Lactobacillales.Lactobacillaceae.Lactobacillus            | 4.006041764 |  |
| Bacteria.Firmicutes.Bacilli.Lactobacillales.Lactobacillaceae.Pediococcus              | 0           |  |
| Bacteria.Firmicutes.Bacilli.Lactobacillales.Lactobacillaceae.unclassified_genus       | 0           |  |
| Bacteria.Firmicutes.Bacilli.Lactobacillales.Leuconostocaceae                          | 5.526037786 |  |
| Bacteria.Firmicutes.Bacilli.Lactobacillales.Leuconostocaceae.Leuconostoc              | 5.013701879 |  |
| Bacteria.Firmicutes.Bacilli.Lactobacillales.Leuconostocaceae.unclassified_genus       | 3.158809693 |  |
| Bacteria.Firmicutes.Bacilli.Lactobacillales.Leuconostocaceae.Weissella                | 5.377292353 |  |
| Bacteria.Firmicutes.Bacilli.Lactobacillales.Streptococcaceae                          | 5.175368537 |  |
| Bacteria.Firmicutes.Bacilli.Lactobacillales.Streptococcaceae.Lactococcus              | 5.068435877 |  |
| Bacteria.Firmicutes.Bacilli.Lactobacillales.Streptococcaceae.Streptococcus            | 4.473874074 |  |
| Bacteria.Firmicutes.Bacilli.Lactobacillales.Streptococcaceae.unclassified_genus       | 3.463397973 |  |
| Bacteria.Firmicutes.Bacilli.Lactobacillales.unclassified_family                       | 2.785686103 |  |
| Bacteria.Firmicutes.Bacilli.Lactobacillales.unclassified_family.unclassified_genus    | 2.785686103 |  |
| Bacteria.Firmicutes.Bacilli.unclassified_order                                        | 0           |  |
| Bacteria.Firmicutes.Bacilli.unclassified_order.unclassified_family                    | 0           |  |
| Bacteria.Firmicutes.Bacilli.unclassified_order.unclassified_family.unclassified_genus | 0           |  |
| Bacteria.Firmicutes.Clostridia                                                        | 4.144674124 |  |
| Bacteria.Firmicutes.Clostridia.Clostridiales                                          | 4.144674124 |  |
| Bacteria.Firmicutes.Clostridia.Clostridiales.Clostridiaceae                           | 2.855425792 |  |
| Bacteria.Firmicutes.Clostridia.Clostridiales.Clostridiaceae.Clostridium               | 2.855425792 |  |
| Bacteria.Firmicutes.Clostridia.Clostridiales.Clostridiaceae.Thermobrachium            | 0           |  |
| Bacteria.Firmicutes.Clostridia.Clostridiales.Clostridiaceae.unclassified_genus        | 0           |  |
| Bacteria.Firmicutes.Clostridia.Clostridiales.Eubacteriaceae                           | 0           |  |
| Bacteria.Firmicutes.Clostridia.Clostridiales.Eubacteriaceae.Eubacterium               | 0           |  |
| Bacteria.Firmicutes.Clostridia.Clostridiales.Eubacteriaceae.unclassified_genus        | 0           |  |
| Bacteria.Firmicutes.Clostridia.Clostridiales.IncertaeSedisXI                          | 2.785686103 |  |
| Bacteria.Firmicutes.Clostridia.Clostridiales.IncertaeSedisXI.Anaerococcus             | 0           |  |
| Bacteria.Firmicutes.Clostridia.Clostridiales.IncertaeSedisXI.Anaerosphaera            | 0           |  |
| Bacteria.Firmicutes.Clostridia.Clostridiales.IncertaeSedisXI.Finegoldia               | 0           |  |
| Bacteria.Firmicutes.Clostridia.Clostridiales.IncertaeSedisXI.Gallicola                | 0           |  |
| Bacteria.Firmicutes.Clostridia.Clostridiales.IncertaeSedisXI.Parvimonas               | 0           |  |
| Bacteria.Firmicutes.Clostridia.Clostridiales.IncertaeSedisXI.Peptoniphilus            | 0           |  |
| Bacteria.Firmicutes.Clostridia.Clostridiales.IncertaeSedisXI.Sporanaerobacter         | 0           |  |
| Bacteria.Firmicutes.Clostridia.Clostridiales.IncertaeSedisXI.Tepidimicrobium          | 0           |  |
| Bacteria.Firmicutes.Clostridia.Clostridiales.IncertaeSedisXI.Tissierella              | 0           |  |
| Bacteria.Firmicutes.Clostridia.Clostridiales.IncertaeSedisXI.unclassified_genus       | 2.785686103 |  |
| Bacteria.Firmicutes.Clostridia.Clostridiales.IncertaeSedisXIII                        | 0           |  |
| Bacteria.Firmicutes.Clostridia.Clostridiales.IncertaeSedisXIII.Anaerovorax            | 0           |  |
| Bacteria.Firmicutes.Clostridia.Clostridiales.IncertaeSedisXIII.unclassified_genus     | 0           |  |
| Bacteria.Firmicutes.Clostridia.Clostridiales.IncertaeSedisXIV                         | 0           |  |
| Bacteria.Firmicutes.Clostridia.Clostridiales.IncertaeSedisXIV.Blaugia                 | 0           |  |
| Bacteria.Firmicutes.Clostridia.Clostridiales.Lachnospiraceae                          | 0           |  |
| Bacteria.Firmicutes.Clostridia.Clostridiales.Lachnospiraceae.Anaerosporobacter        | 0           |  |
| Bacteria.Firmicutes.Clostridia.Clostridiales.Lachnospiraceae.Oribacterium             | 0           |  |
| Bacteria.Firmicutes.Clostridia.Clostridiales.Lachnospiraceae.unclassified_genus       | 0           |  |
| Bacteria.Firmicutes.Clostridia.Clostridiales.Peptococcaceae                           | 0           |  |
| Bacteria.Firmicutes.Clostridia.Clostridiales.Peptococcaceae.Peptococcus               | 0           |  |
| Bacteria.Firmicutes.Clostridia.Clostridiales.Peptococcaceae.unclassified_genus        | 0           |  |
| Bacteria.Firmicutes.Clostridia.Clostridiales.Peptostreptococcaceae                    | 2.785686103 |  |
| Bacteria.Firmicutes.Clostridia.Clostridiales.Peptostreptococcaceae.Peptostreptococcus | 0           |  |
| Bacteria.Firmicutes.Clostridia.Clostridiales.Peptostreptococcaceae.Sporacetigenium    | 0           |  |
| Bacteria.Firmicutes.Clostridia.Clostridiales.Peptostreptococcaceae.unclassified_genus | 2.785686103 |  |
| Bacteria.Firmicutes.Clostridia.Clostridiales.Ruminococcaceae                          | 3.7373652   |  |
| Bacteria.Firmicutes.Clostridia.Clostridiales.Ruminococcaceae.Acetivibrio              | 0           |  |
| Bacteria.Firmicutes.Clostridia.Clostridiales.Ruminococcaceae.Anaerofilum              | 0           |  |
| Bacteria.Firmicutes.Clostridia.Clostridiales.Ruminococcaceae.Anaerotruncus            | 0           |  |
| Bacteria.Firmicutes.Clostridia.Clostridiales.Ruminococcaceae.Butyrivicoccus           | 0           |  |
| Bacteria.Firmicutes.Clostridia.Clostridiales.Ruminococcaceae.Faecalibacterium         | 0           |  |
| Bacteria.Firmicutes.Clostridia.Clostridiales.Ruminococcaceae.Oscillibacter            | 0           |  |
| Bacteria.Firmicutes.Clostridia.Clostridiales.Ruminococcaceae.Ruminococcus             | 0           |  |
| Bacteria.Firmicutes.Clostridia.Clostridiales.Ruminococcaceae.Subdoligranulum          | 0           |  |
| Bacteria.Firmicutes.Clostridia.Clostridiales.Ruminococcaceae.unclassified_genus       | 3.7373652   |  |
| Bacteria.Firmicutes.Clostridia.Clostridiales.unclassified_family                      | 0           |  |
| Bacteria.Firmicutes.Clostridia.Clostridiales.unclassified_family.unclassified_genus   | 0           |  |
| Bacteria.Firmicutes.Clostridia.Clostridiales.Veillonellaceae                          | 3.97498136  |  |
| Bacteria.Firmicutes.Clostridia.Clostridiales.Veillonellaceae.Anaeroarcus              | 0           |  |
| Bacteria.Firmicutes.Clostridia.Clostridiales.Veillonellaceae.Dialister                | 0           |  |
| Bacteria.Firmicutes.Clostridia.Clostridiales.Veillonellaceae.Megasphaera              | 0           |  |
| Bacteria.Firmicutes.Clostridia.Clostridiales.Veillonellaceae.Phascolarctobacterium    | 0           |  |
| Bacteria.Firmicutes.Clostridia.Clostridiales.Veillonellaceae.Selenomonas              | 0           |  |
| Bacteria.Firmicutes.Clostridia.Clostridiales.Veillonellaceae.Sporomusa                | 0           |  |
| Bacteria.Firmicutes.Clostridia.Clostridiales.Veillonellaceae.Sporotalea               | 0           |  |

|                                                                                                                 |             |  |
|-----------------------------------------------------------------------------------------------------------------|-------------|--|
| Bacteria.Firmicutes.Clostridia.Clostridiales.Veillonellaceae.unclassified_genus                                 | 0           |  |
| Bacteria.Firmicutes.Clostridia.Clostridiales.Veillonellaceae.Veillonella                                        | 3.97498136  |  |
| Bacteria.Firmicutes.Clostridia.unclassified_order                                                               | 0           |  |
| Bacteria.Firmicutes.Clostridia.unclassified_order.unclassified_family                                           | 0           |  |
| Bacteria.Firmicutes.Clostridia.unclassified_order.unclassified_family.unclassified_genus                        | 0           |  |
| Bacteria.Firmicutes.Erysipelotrichi                                                                             | 0           |  |
| Bacteria.Firmicutes.Erysipelotrichi.Erysipelotrichales                                                          | 0           |  |
| Bacteria.Firmicutes.Erysipelotrichi.Erysipelotrichales.Erysipelotrichaceae                                      | 0           |  |
| Bacteria.Firmicutes.Erysipelotrichi.Erysipelotrichales.Erysipelotrichaceae.Allobaculum                          | 0           |  |
| Bacteria.Firmicutes.Erysipelotrichi.Erysipelotrichales.Erysipelotrichaceae.Erysipelothrix                       | 0           |  |
| Bacteria.Firmicutes.Erysipelotrichi.Erysipelotrichales.Erysipelotrichaceae.Turicibacter                         | 0           |  |
| Bacteria.Firmicutes.Erysipelotrichi.Erysipelotrichales.Erysipelotrichaceae.unclassified_genus                   | 0           |  |
| Bacteria.Firmicutes.unclassified_class                                                                          | 0           |  |
| Bacteria.Firmicutes.unclassified_class.unclassified_order                                                       | 0           |  |
| Bacteria.Firmicutes.unclassified_class.unclassified_order.unclassified_family                                   | 0           |  |
| Bacteria.Firmicutes.unclassified_class.unclassified_order.unclassified_family.unclassified_genus                | 0           |  |
| Bacteria.Fusobacteria                                                                                           | 0           |  |
| Bacteria.Fusobacteria.Fusobacteria                                                                              | 0           |  |
| Bacteria.Fusobacteria.Fusobacteria.Fusobacteriales                                                              | 0           |  |
| Bacteria.Fusobacteria.Fusobacteria.Fusobacteriales.Fusobacteriaceae                                             | 0           |  |
| Bacteria.Fusobacteria.Fusobacteria.Fusobacteriales.Fusobacteriaceae.Cetobacterium                               | 0           |  |
| Bacteria.Fusobacteria.Fusobacteria.Fusobacteriales.Fusobacteriaceae.Fusobacterium                               | 0           |  |
| Bacteria.Fusobacteria.Fusobacteria.Fusobacteriales.Fusobacteriaceae.unclassified_genus                          | 0           |  |
| Bacteria.Fusobacteria.Fusobacteria.Fusobacteriales.Leptotrichiaceae                                             | 0           |  |
| Bacteria.Fusobacteria.Fusobacteria.Fusobacteriales.Leptotrichiaceae.Leptotrichia                                | 0           |  |
| Bacteria.Fusobacteria.Fusobacteria.Fusobacteriales.Leptotrichiaceae.Sebaldella                                  | 0           |  |
| Bacteria.Fusobacteria.Fusobacteria.Fusobacteriales.unclassified_family                                          | 0           |  |
| Bacteria.Fusobacteria.Fusobacteria.Fusobacteriales.unclassified_family.unclassified_genus                       | 0           |  |
| Bacteria.Gemmatimonadetes                                                                                       | 0           |  |
| Bacteria.Gemmatimonadetes.Gemmatimonadetes                                                                      | 0           |  |
| Bacteria.Gemmatimonadetes.Gemmatimonadetes.Gemmatimonadales                                                     | 0           |  |
| Bacteria.Gemmatimonadetes.Gemmatimonadetes.Gemmatimonadales.Gemmatimonadaceae                                   | 0           |  |
| Bacteria.Gemmatimonadetes.Gemmatimonadetes.Gemmatimonadales.Gemmatimonadaceae.Gemmatimonas                      | 0           |  |
| Bacteria.Nitrospira                                                                                             | 0           |  |
| Bacteria.Nitrospira.Nitrospira                                                                                  | 0           |  |
| Bacteria.Nitrospira.Nitrospira.Nitrospirales                                                                    | 0           |  |
| Bacteria.Nitrospira.Nitrospira.Nitrospirales.Nitrospiraceae                                                     | 0           |  |
| Bacteria.Nitrospira.Nitrospira.Nitrospirales.Nitrospiraceae.Nitrospira                                          | 0           |  |
| Bacteria.OD1                                                                                                    | 0           |  |
| Bacteria.OD1.OD1_genera_incertae_sedis                                                                          | 0           |  |
| Bacteria.OD1.OD1_genera_incertae_sedis.unclassified_order                                                       | 0           |  |
| Bacteria.OD1.OD1_genera_incertae_sedis.unclassified_order.unclassified_family                                   | 0           |  |
| Bacteria.OD1.OD1_genera_incertae_sedis.unclassified_order.unclassified_family.unclassified_genus                | 0           |  |
| Bacteria.Planctomycetes                                                                                         | 0           |  |
| Bacteria.Planctomycetes.Planctomycetacia                                                                        | 0           |  |
| Bacteria.Planctomycetes.Planctomycetacia.Planctomycetales                                                       | 0           |  |
| Bacteria.Planctomycetes.Planctomycetacia.Planctomycetales.Planctomycetaceae                                     | 0           |  |
| Bacteria.Planctomycetes.Planctomycetacia.Planctomycetales.Planctomycetaceae.Gemmata                             | 0           |  |
| Bacteria.Planctomycetes.Planctomycetacia.Planctomycetales.Planctomycetaceae.Planctomyces                        | 0           |  |
| Bacteria.Planctomycetes.Planctomycetacia.Planctomycetales.Planctomycetaceae.Rhodopirellula                      | 0           |  |
| Bacteria.Planctomycetes.Planctomycetacia.Planctomycetales.Planctomycetaceae.Singulisphaera                      | 0           |  |
| Bacteria.Planctomycetes.Planctomycetacia.Planctomycetales.Planctomycetaceae.unclassified_genus                  | 0           |  |
| Bacteria.Proteobacteria                                                                                         | 5.638351693 |  |
| Bacteria.Proteobacteria.Alphaproteobacteria                                                                     | 5.372340553 |  |
| Bacteria.Proteobacteria.Alphaproteobacteria.Alphaproteobacteria_incertae_sedis                                  | 2.776244546 |  |
| Bacteria.Proteobacteria.Alphaproteobacteria.Alphaproteobacteria_incertae_sedis.Novispirillum                    | 2.776244546 |  |
| Bacteria.Proteobacteria.Alphaproteobacteria.Alphaproteobacteria_incertae_sedis.Novispirillum.unclassified_genus | 2.776244546 |  |
| Bacteria.Proteobacteria.Alphaproteobacteria.Caulobacterales                                                     | 0           |  |
| Bacteria.Proteobacteria.Alphaproteobacteria.Caulobacterales.Caulobacteraceae                                    | 0           |  |
| Bacteria.Proteobacteria.Alphaproteobacteria.Caulobacterales.Caulobacteraceae.Asticcacaulis                      | 0           |  |
| Bacteria.Proteobacteria.Alphaproteobacteria.Caulobacterales.Caulobacteraceae.Brevundimonas                      | 0           |  |
| Bacteria.Proteobacteria.Alphaproteobacteria.Caulobacterales.Caulobacteraceae.Caulobacter                        | 0           |  |
| Bacteria.Proteobacteria.Alphaproteobacteria.Caulobacterales.Caulobacteraceae.Phenylobacterium                   | 0           |  |
| Bacteria.Proteobacteria.Alphaproteobacteria.Caulobacterales.Caulobacteraceae.unclassified_genus                 | 0           |  |
| Bacteria.Proteobacteria.Alphaproteobacteria.Rhizobiales                                                         | 4.162910185 |  |
| Bacteria.Proteobacteria.Alphaproteobacteria.Rhizobiales.Bradyrhizobiaceae                                       | 4.144296435 |  |
| Bacteria.Proteobacteria.Alphaproteobacteria.Rhizobiales.Bradyrhizobiaceae.Agromonas                             | 0           |  |
| Bacteria.Proteobacteria.Alphaproteobacteria.Rhizobiales.Bradyrhizobiaceae.Bosea                                 | 0           |  |
| Bacteria.Proteobacteria.Alphaproteobacteria.Rhizobiales.Bradyrhizobiaceae.unclassified_genus                    | 4.144296435 |  |
| Bacteria.Proteobacteria.Alphaproteobacteria.Rhizobiales.Brucellaceae                                            | 0           |  |
| Bacteria.Proteobacteria.Alphaproteobacteria.Rhizobiales.Brucellaceae.Ochrobactrum                               | 0           |  |
| Bacteria.Proteobacteria.Alphaproteobacteria.Rhizobiales.Hyphomicrobiaceae                                       | 0           |  |
| Bacteria.Proteobacteria.Alphaproteobacteria.Rhizobiales.Hyphomicrobiaceae.Devosia                               | 0           |  |
| Bacteria.Proteobacteria.Alphaproteobacteria.Rhizobiales.Hyphomicrobiaceae.unclassified_genus                    | 0           |  |
| Bacteria.Proteobacteria.Alphaproteobacteria.Rhizobiales.Methylobacteriaceae                                     | 0           |  |
| Bacteria.Proteobacteria.Alphaproteobacteria.Rhizobiales.Methylobacteriaceae.Methylobacterium                    | 0           |  |
| Bacteria.Proteobacteria.Alphaproteobacteria.Rhizobiales.Methylobacteriaceae.Methylocystaceae                    | 0           |  |
| Bacteria.Proteobacteria.Alphaproteobacteria.Rhizobiales.Methylobacteriaceae.Methylocystis                       | 0           |  |
| Bacteria.Proteobacteria.Alphaproteobacteria.Rhizobiales.Rhizobiaceae                                            | 0           |  |
| Bacteria.Proteobacteria.Alphaproteobacteria.Rhizobiales.Rhizobiaceae.Rhizobium                                  | 0           |  |
| Bacteria.Proteobacteria.Alphaproteobacteria.Rhizobiales.Rhizobiaceae.Sinorhizobium                              | 0           |  |
| Bacteria.Proteobacteria.Alphaproteobacteria.Rhizobiales.unclassified_family                                     | 2.785686103 |  |
| Bacteria.Proteobacteria.Alphaproteobacteria.Rhizobiales.unclassified_family.unclassified_genus                  | 2.785686103 |  |
| Bacteria.Proteobacteria.Alphaproteobacteria.Rhizobiales.Xanthobacteraceae                                       | 0           |  |



|                                                                                                              |             |  |
|--------------------------------------------------------------------------------------------------------------|-------------|--|
| Bacteria.Proteobacteria.Alphaproteobacteria.Rhizobiales.Xanthobacteraceae.Azorhizobium                       | 0           |  |
| Bacteria.Proteobacteria.Alphaproteobacteria.Rhodobacterales                                                  | 0           |  |
| Bacteria.Proteobacteria.Alphaproteobacteria.Rhodobacterales.Rhodobacteraceae                                 | 0           |  |
| Bacteria.Proteobacteria.Alphaproteobacteria.Rhodobacterales.Rhodobacteraceae.Haematobacter                   | 0           |  |
| Bacteria.Proteobacteria.Alphaproteobacteria.Rhodobacterales.Rhodobacteraceae.Pannonibacter                   | 0           |  |
| Bacteria.Proteobacteria.Alphaproteobacteria.Rhodobacterales.Rhodobacteraceae.Paracoccus                      | 0           |  |
| Bacteria.Proteobacteria.Alphaproteobacteria.Rhodobacterales.Rhodobacteraceae.Rhodobacter                     | 0           |  |
| Bacteria.Proteobacteria.Alphaproteobacteria.Rhodobacterales.Rhodobacteraceae.Rubellimicrobium                | 0           |  |
| Bacteria.Proteobacteria.Alphaproteobacteria.Rhodobacterales.Rhodobacteraceae.unclassified_genus              | 0           |  |
| Bacteria.Proteobacteria.Alphaproteobacteria.Rhodospirillales                                                 | 0           |  |
| Bacteria.Proteobacteria.Alphaproteobacteria.Rhodospirillales.Acetobacteraceae                                | 0           |  |
| Bacteria.Proteobacteria.Alphaproteobacteria.Rhodospirillales.Acetobacteraceae.Acetobacter                    | 0           |  |
| Bacteria.Proteobacteria.Alphaproteobacteria.Rhodospirillales.Acetobacteraceae.Belnapia                       | 0           |  |
| Bacteria.Proteobacteria.Alphaproteobacteria.Rhodospirillales.Acetobacteraceae.Gluconacetobacter              | 0           |  |
| Bacteria.Proteobacteria.Alphaproteobacteria.Rhodospirillales.Acetobacteraceae.Gluconobacter                  | 0           |  |
| Bacteria.Proteobacteria.Alphaproteobacteria.Rhodospirillales.Acetobacteraceae.Roseococcus                    | 0           |  |
| Bacteria.Proteobacteria.Alphaproteobacteria.Rhodospirillales.Acetobacteraceae.Roseomonas                     | 0           |  |
| Bacteria.Proteobacteria.Alphaproteobacteria.Rhodospirillales.Acetobacteraceae.unclassified_genus             | 0           |  |
| Bacteria.Proteobacteria.Alphaproteobacteria.Rhodospirillales.Rhodospirillaceae                               | 0           |  |
| Bacteria.Proteobacteria.Alphaproteobacteria.Rhodospirillales.Rhodospirillaceae.Azospirillum                  | 0           |  |
| Bacteria.Proteobacteria.Alphaproteobacteria.Rhodospirillales.Rhodospirillaceae.Skermanella                   | 0           |  |
| Bacteria.Proteobacteria.Alphaproteobacteria.Rhodospirillales.Rhodospirillaceae.Telmatospirillum              | 0           |  |
| Bacteria.Proteobacteria.Alphaproteobacteria.Rhodospirillales.Rhodospirillaceae.unclassified_genus            | 0           |  |
| Bacteria.Proteobacteria.Alphaproteobacteria.Sphingomonadales                                                 | 5.346030909 |  |
| Bacteria.Proteobacteria.Alphaproteobacteria.Sphingomonadales.Erythrobacteraceae                              | 0           |  |
| Bacteria.Proteobacteria.Alphaproteobacteria.Sphingomonadales.Erythrobacteraceae.Porphrobacter                | 0           |  |
| Bacteria.Proteobacteria.Alphaproteobacteria.Sphingomonadales.Sphingomonadaceae                               | 5.346030909 |  |
| Bacteria.Proteobacteria.Alphaproteobacteria.Sphingomonadales.Sphingomonadaceae.Blastomonas                   | 0           |  |
| Bacteria.Proteobacteria.Alphaproteobacteria.Sphingomonadales.Sphingomonadaceae.Novosphingobium               | 0           |  |
| Bacteria.Proteobacteria.Alphaproteobacteria.Sphingomonadales.Sphingomonadaceae.Sphingobium                   | 0           |  |
| Bacteria.Proteobacteria.Alphaproteobacteria.Sphingomonadales.Sphingomonadaceae.Sphingomonas                  | 5.302580705 |  |
| Bacteria.Proteobacteria.Alphaproteobacteria.Sphingomonadales.Sphingomonadaceae.unclassified_genus            | 4.327088739 |  |
| Bacteria.Proteobacteria.Alphaproteobacteria.Sphingomonadales.unclassified_family                             | 0           |  |
| Bacteria.Proteobacteria.Alphaproteobacteria.Sphingomonadales.unclassified_family.unclassified_genus          | 0           |  |
| Bacteria.Proteobacteria.Alphaproteobacteria.unclassified_order                                               | 0           |  |
| Bacteria.Proteobacteria.Alphaproteobacteria.unclassified_order.unclassified_family                           | 0           |  |
| Bacteria.Proteobacteria.Alphaproteobacteria.unclassified_order.unclassified_family.unclassified_genus        | 0           |  |
| Bacteria.Proteobacteria.Betaproteobacteria                                                                   | 4.403487516 |  |
| Bacteria.Proteobacteria.Betaproteobacteria.Burkholderiales                                                   | 4.336675083 |  |
| Bacteria.Proteobacteria.Betaproteobacteria.Burkholderiales.Alcaligenaceae                                    | 0           |  |
| Bacteria.Proteobacteria.Betaproteobacteria.Burkholderiales.Alcaligenaceae.Achromobacter                      | 0           |  |
| Bacteria.Proteobacteria.Betaproteobacteria.Burkholderiales.Alcaligenaceae.Alcaligenes                        | 0           |  |
| Bacteria.Proteobacteria.Betaproteobacteria.Burkholderiales.Alcaligenaceae.Sutterella                         | 0           |  |
| Bacteria.Proteobacteria.Betaproteobacteria.Burkholderiales.Alcaligenaceae.unclassified_genus                 | 0           |  |
| Bacteria.Proteobacteria.Betaproteobacteria.Burkholderiales.Burkholderiaceae                                  | 3.151810883 |  |
| Bacteria.Proteobacteria.Betaproteobacteria.Burkholderiales.Burkholderiaceae.Burkholderia                     | 3.151810883 |  |
| Bacteria.Proteobacteria.Betaproteobacteria.Burkholderiales.Burkholderiaceae.Chitinimonas                     | 0           |  |
| Bacteria.Proteobacteria.Betaproteobacteria.Burkholderiales.Burkholderiaceae.Cupriavidus                      | 0           |  |
| Bacteria.Proteobacteria.Betaproteobacteria.Burkholderiales.Burkholderiaceae.Pandoraea                        | 0           |  |
| Bacteria.Proteobacteria.Betaproteobacteria.Burkholderiales.Burkholderiaceae.Polynucleobacter                 | 0           |  |
| Bacteria.Proteobacteria.Betaproteobacteria.Burkholderiales.Burkholderiaceae.Ralstonia                        | 0           |  |
| Bacteria.Proteobacteria.Betaproteobacteria.Burkholderiales.Burkholderiaceae.unclassified_genus               | 0           |  |
| Bacteria.Proteobacteria.Betaproteobacteria.Burkholderiales.Burkholderiales_incertae_sedis                    | 2.855425792 |  |
| Bacteria.Proteobacteria.Betaproteobacteria.Burkholderiales.Burkholderiales_incertae_sedis.Aquabacterium      | 2.855425792 |  |
| Bacteria.Proteobacteria.Betaproteobacteria.Burkholderiales.Burkholderiales_incertae_sedis.Ideonella          | 0           |  |
| Bacteria.Proteobacteria.Betaproteobacteria.Burkholderiales.Burkholderiales_incertae_sedis.Leptothrix         | 0           |  |
| Bacteria.Proteobacteria.Betaproteobacteria.Burkholderiales.Burkholderiales_incertae_sedis.Tepidimonas        | 0           |  |
| Bacteria.Proteobacteria.Betaproteobacteria.Burkholderiales.Burkholderiales_incertae_sedis.unclassified_genus | 0           |  |
| Bacteria.Proteobacteria.Betaproteobacteria.Burkholderiales.Comamonadaceae                                    | 4.243722454 |  |
| Bacteria.Proteobacteria.Betaproteobacteria.Burkholderiales.Comamonadaceae.Acidovorax                         | 4.179479473 |  |
| Bacteria.Proteobacteria.Betaproteobacteria.Burkholderiales.Comamonadaceae.Alicyclophilus                     | 0           |  |
| Bacteria.Proteobacteria.Betaproteobacteria.Burkholderiales.Comamonadaceae.Comamonas                          | 0           |  |
| Bacteria.Proteobacteria.Betaproteobacteria.Burkholderiales.Comamonadaceae.Curvibacter                        | 0           |  |
| Bacteria.Proteobacteria.Betaproteobacteria.Burkholderiales.Comamonadaceae.Delftia                            | 0           |  |
| Bacteria.Proteobacteria.Betaproteobacteria.Burkholderiales.Comamonadaceae.Diaphorobacter                     | 3.382038226 |  |
| Bacteria.Proteobacteria.Betaproteobacteria.Burkholderiales.Comamonadaceae.Hydrogenophaga                     | 0           |  |
| Bacteria.Proteobacteria.Betaproteobacteria.Burkholderiales.Comamonadaceae.Pelomonas                          | 0           |  |
| Bacteria.Proteobacteria.Betaproteobacteria.Burkholderiales.Comamonadaceae.Polaromonas                        | 0           |  |
| Bacteria.Proteobacteria.Betaproteobacteria.Burkholderiales.Comamonadaceae.Rhodoferax                         | 0           |  |
| Bacteria.Proteobacteria.Betaproteobacteria.Burkholderiales.Comamonadaceae.unclassified_genus                 | 0           |  |
| Bacteria.Proteobacteria.Betaproteobacteria.Burkholderiales.Comamonadaceae.Variovorax                         | 0           |  |
| Bacteria.Proteobacteria.Betaproteobacteria.Burkholderiales.Oxalobacteraceae                                  | 2.776244546 |  |
| Bacteria.Proteobacteria.Betaproteobacteria.Burkholderiales.Oxalobacteraceae.Duganella                        | 0           |  |
| Bacteria.Proteobacteria.Betaproteobacteria.Burkholderiales.Oxalobacteraceae.Herbaspirillum                   | 0           |  |
| Bacteria.Proteobacteria.Betaproteobacteria.Burkholderiales.Oxalobacteraceae.Janthinobacterium                | 0           |  |
| Bacteria.Proteobacteria.Betaproteobacteria.Burkholderiales.Oxalobacteraceae.Massilia                         | 0           |  |
| Bacteria.Proteobacteria.Betaproteobacteria.Burkholderiales.Oxalobacteraceae.Oxalobacter                      | 0           |  |
| Bacteria.Proteobacteria.Betaproteobacteria.Burkholderiales.Oxalobacteraceae.unclassified_genus               | 2.776244546 |  |
| Bacteria.Proteobacteria.Betaproteobacteria.Burkholderiales.unclassified_family                               | 3.476364159 |  |
| Bacteria.Proteobacteria.Betaproteobacteria.Burkholderiales.unclassified_family.unclassified_genus            | 3.476364159 |  |
| Bacteria.Proteobacteria.Betaproteobacteria.Hydrogenophilaes                                                  | 0           |  |
| Bacteria.Proteobacteria.Betaproteobacteria.Hydrogenophilaes.Hydrogenophilaecae                               | 0           |  |
| Bacteria.Proteobacteria.Betaproteobacteria.Hydrogenophilaes.Hydrogenophilaecae.Hydrogenophilus               | 0           |  |
| Bacteria.Proteobacteria.Betaproteobacteria.Hydrogenophilaes.Hydrogenophilaecae.Petrobacter                   | 0           |  |

|                                                                                                         |             |  |
|---------------------------------------------------------------------------------------------------------|-------------|--|
| Bacteria.Proteobacteria.Betaproteobacteria.Methylophilales                                              | 0           |  |
| Bacteria.Proteobacteria.Betaproteobacteria.Methylophilales.Methylophilaceae                             | 0           |  |
| Bacteria.Proteobacteria.Betaproteobacteria.Methylophilales.Methylophilaceae.Methylobacillus             | 0           |  |
| Bacteria.Proteobacteria.Betaproteobacteria.Methylophilales.Methylophilaceae.Methylophilus               | 0           |  |
| Bacteria.Proteobacteria.Betaproteobacteria.Methylophilales.Methylophilaceae.unclassified_genus          | 0           |  |
| Bacteria.Proteobacteria.Betaproteobacteria.Neisseriales                                                 | 3.557582461 |  |
| Bacteria.Proteobacteria.Betaproteobacteria.Neisseriales.Neisseriaceae                                   | 3.557582461 |  |
| Bacteria.Proteobacteria.Betaproteobacteria.Neisseriales.Neisseriaceae.Aquitalea                         | 0           |  |
| Bacteria.Proteobacteria.Betaproteobacteria.Neisseriales.Neisseriaceae.Kingella                          | 0           |  |
| Bacteria.Proteobacteria.Betaproteobacteria.Neisseriales.Neisseriaceae.Microvirgula                      | 3.463397973 |  |
| Bacteria.Proteobacteria.Betaproteobacteria.Neisseriales.Neisseriaceae.Neisseria                         | 0           |  |
| Bacteria.Proteobacteria.Betaproteobacteria.Neisseriales.Neisseriaceae.unclassified_genus                | 0           |  |
| Bacteria.Proteobacteria.Betaproteobacteria.Neisseriales.Neisseriaceae.Uruburuella                       | 0           |  |
| Bacteria.Proteobacteria.Betaproteobacteria.Neisseriales.Neisseriaceae.Vitreoscilla                      | 0           |  |
| Bacteria.Proteobacteria.Betaproteobacteria.Neisseriales.Neisseriaceae.Vogesella                         | 3.077274542 |  |
| Bacteria.Proteobacteria.Betaproteobacteria.Nitrosomonadales                                             | 0           |  |
| Bacteria.Proteobacteria.Betaproteobacteria.Nitrosomonadales.Nitrosomonadaceae                           | 0           |  |
| Bacteria.Proteobacteria.Betaproteobacteria.Nitrosomonadales.Nitrosomonadaceae.Nitrosospira              | 0           |  |
| Bacteria.Proteobacteria.Betaproteobacteria.Nitrosomonadales.Nitrosomonadaceae.unclassified_genus        | 0           |  |
| Bacteria.Proteobacteria.Betaproteobacteria.Rhodocyclales                                                | 0           |  |
| Bacteria.Proteobacteria.Betaproteobacteria.Rhodocyclales.Rhodocyclaceae                                 | 0           |  |
| Bacteria.Proteobacteria.Betaproteobacteria.Rhodocyclales.Rhodocyclaceae.Azonexus                        | 0           |  |
| Bacteria.Proteobacteria.Betaproteobacteria.Rhodocyclales.Rhodocyclaceae.Azospira                        | 0           |  |
| Bacteria.Proteobacteria.Betaproteobacteria.Rhodocyclales.Rhodocyclaceae.Dechloromonas                   | 0           |  |
| Bacteria.Proteobacteria.Betaproteobacteria.Rhodocyclales.Rhodocyclaceae.Methyloversatilis               | 0           |  |
| Bacteria.Proteobacteria.Betaproteobacteria.Rhodocyclales.Rhodocyclaceae.Propionivibrio                  | 0           |  |
| Bacteria.Proteobacteria.Betaproteobacteria.Rhodocyclales.Rhodocyclaceae.Shinella                        | 0           |  |
| Bacteria.Proteobacteria.Betaproteobacteria.Rhodocyclales.Rhodocyclaceae.Thaueria                        | 0           |  |
| Bacteria.Proteobacteria.Betaproteobacteria.Rhodocyclales.Rhodocyclaceae.unclassified_genus              | 0           |  |
| Bacteria.Proteobacteria.Betaproteobacteria.Rhodocyclales.Rhodocyclaceae.Zoogloea                        | 0           |  |
| Bacteria.Proteobacteria.Betaproteobacteria.unclassified_order                                           | 0           |  |
| Bacteria.Proteobacteria.Betaproteobacteria.unclassified_order.unclassified_family                       | 0           |  |
| Bacteria.Proteobacteria.Betaproteobacteria.unclassified_order.unclassified_family.unclassified_genus    | 0           |  |
| Bacteria.Proteobacteria.Deltaproteobacteria                                                             | 0           |  |
| Bacteria.Proteobacteria.Deltaproteobacteria.Bdellovibrionales                                           | 0           |  |
| Bacteria.Proteobacteria.Deltaproteobacteria.Bdellovibrionales.Bacteriovoraceae                          | 0           |  |
| Bacteria.Proteobacteria.Deltaproteobacteria.Bdellovibrionales.Bacteriovoraceae.Bacteriovorax            | 0           |  |
| Bacteria.Proteobacteria.Deltaproteobacteria.Bdellovibrionales.Bacteriovoraceae.Peredibacter             | 0           |  |
| Bacteria.Proteobacteria.Deltaproteobacteria.Bdellovibrionales.Bdellovibrionaceae                        | 0           |  |
| Bacteria.Proteobacteria.Deltaproteobacteria.Bdellovibrionales.Bdellovibrionaceae.Bdellovibrio           | 0           |  |
| Bacteria.Proteobacteria.Deltaproteobacteria.Desulfovibrionales                                          | 0           |  |
| Bacteria.Proteobacteria.Deltaproteobacteria.Desulfovibrionales.Desulfovibrionaceae                      | 0           |  |
| Bacteria.Proteobacteria.Deltaproteobacteria.Desulfovibrionales.Desulfovibrionaceae.Desulfovibrio        | 0           |  |
| Bacteria.Proteobacteria.Deltaproteobacteria.Desulfuromonadales                                          | 0           |  |
| Bacteria.Proteobacteria.Deltaproteobacteria.Desulfuromonadales.Geobacteraceae                           | 0           |  |
| Bacteria.Proteobacteria.Deltaproteobacteria.Desulfuromonadales.Geobacteraceae.Geobacter                 | 0           |  |
| Bacteria.Proteobacteria.Deltaproteobacteria.Myxococcales                                                | 0           |  |
| Bacteria.Proteobacteria.Deltaproteobacteria.Myxococcales.Cystobacteraceae                               | 0           |  |
| Bacteria.Proteobacteria.Deltaproteobacteria.Myxococcales.Cystobacteraceae.Cystobacter                   | 0           |  |
| Bacteria.Proteobacteria.Deltaproteobacteria.Myxococcales.Cystobacteraceae.unclassified_genus            | 0           |  |
| Bacteria.Proteobacteria.Deltaproteobacteria.Myxococcales.Nannocystaceae                                 | 0           |  |
| Bacteria.Proteobacteria.Deltaproteobacteria.Myxococcales.Nannocystaceae.Nannocystis                     | 0           |  |
| Bacteria.Proteobacteria.Deltaproteobacteria.Myxococcales.Polyangiaceae                                  | 0           |  |
| Bacteria.Proteobacteria.Deltaproteobacteria.Myxococcales.Polyangiaceae.Byssovorax                       | 0           |  |
| Bacteria.Proteobacteria.Deltaproteobacteria.Myxococcales.Polyangiaceae.unclassified_genus               | 0           |  |
| Bacteria.Proteobacteria.Deltaproteobacteria.Myxococcales.unclassified_family                            | 0           |  |
| Bacteria.Proteobacteria.Deltaproteobacteria.Myxococcales.unclassified_family.unclassified_genus         | 0           |  |
| Bacteria.Proteobacteria.Deltaproteobacteria.unclassified_order                                          | 0           |  |
| Bacteria.Proteobacteria.Deltaproteobacteria.unclassified_order.unclassified_family                      | 0           |  |
| Bacteria.Proteobacteria.Deltaproteobacteria.unclassified_order.unclassified_family.unclassified_genus   | 0           |  |
| Bacteria.Proteobacteria.Epsilonproteobacteria                                                           | 3.975339672 |  |
| Bacteria.Proteobacteria.Epsilonproteobacteria.Campylobacteriales                                        | 3.975339672 |  |
| Bacteria.Proteobacteria.Epsilonproteobacteria.Campylobacteriales.Campylobacteraceae                     | 3.975339672 |  |
| Bacteria.Proteobacteria.Epsilonproteobacteria.Campylobacteriales.Campylobacteraceae.Arcobacter          | 3.975339672 |  |
| Bacteria.Proteobacteria.Epsilonproteobacteria.Campylobacteriales.Campylobacteraceae.Campylobacter       | 0           |  |
| Bacteria.Proteobacteria.Epsilonproteobacteria.Campylobacteriales.Campylobacteraceae.Sulfurospirillum    | 0           |  |
| Bacteria.Proteobacteria.Epsilonproteobacteria.Campylobacteriales.Helicobacteraceae                      | 0           |  |
| Bacteria.Proteobacteria.Epsilonproteobacteria.Campylobacteriales.Helicobacteraceae.Helicobacter         | 0           |  |
| Bacteria.Proteobacteria.Epsilonproteobacteria.unclassified_order                                        | 0           |  |
| Bacteria.Proteobacteria.Epsilonproteobacteria.unclassified_order.unclassified_family                    | 0           |  |
| Bacteria.Proteobacteria.Epsilonproteobacteria.unclassified_order.unclassified_family.unclassified_genus | 0           |  |
| Bacteria.Proteobacteria.Gammaproteobacteria                                                             | 5.25934003  |  |
| Bacteria.Proteobacteria.Gammaproteobacteria.Aeromonadales                                               | 2.776244546 |  |
| Bacteria.Proteobacteria.Gammaproteobacteria.Aeromonadales.Aeromonadaceae                                | 2.776244546 |  |
| Bacteria.Proteobacteria.Gammaproteobacteria.Aeromonadales.Aeromonadaceae.Aeromonas                      | 2.776244546 |  |
| Bacteria.Proteobacteria.Gammaproteobacteria.Aeromonadales.Aeromonadaceae.unclassified_genus             | 0           |  |
| Bacteria.Proteobacteria.Gammaproteobacteria.Alteromonadales                                             | 0           |  |
| Bacteria.Proteobacteria.Gammaproteobacteria.Alteromonadales.Shewanellaceae                              | 0           |  |
| Bacteria.Proteobacteria.Gammaproteobacteria.Alteromonadales.Shewanellaceae.Shewanella                   | 0           |  |
| Bacteria.Proteobacteria.Gammaproteobacteria.Alteromonadales.unclassified_family                         | 0           |  |
| Bacteria.Proteobacteria.Gammaproteobacteria.Alteromonadales.unclassified_family.unclassified_genus      | 0           |  |
| Bacteria.Proteobacteria.Gammaproteobacteria.Chromatiales                                                | 0           |  |
| Bacteria.Proteobacteria.Gammaproteobacteria.Chromatiales.Chromatiaceae                                  | 0           |  |
| Bacteria.Proteobacteria.Gammaproteobacteria.Chromatiales.Chromatiaceae.Rheinheimera                     | 0           |  |

|                                                                                                             |             |  |
|-------------------------------------------------------------------------------------------------------------|-------------|--|
| Bacteria.Proteobacteria.Gammaproteobacteria.Enterobacteriales                                               | 4.926510645 |  |
| Bacteria.Proteobacteria.Gammaproteobacteria.Enterobacteriales.Enterobacteriaceae                            | 4.926510645 |  |
| Bacteria.Proteobacteria.Gammaproteobacteria.Enterobacteriales.Enterobacteriaceae.Buttiauxella               | 0           |  |
| Bacteria.Proteobacteria.Gammaproteobacteria.Enterobacteriales.Enterobacteriaceae.Cedecea                    | 0           |  |
| Bacteria.Proteobacteria.Gammaproteobacteria.Enterobacteriales.Enterobacteriaceae.Citrobacter                | 4.674523572 |  |
| Bacteria.Proteobacteria.Gammaproteobacteria.Enterobacteriales.Enterobacteriaceae.Cronobacter                | 0           |  |
| Bacteria.Proteobacteria.Gammaproteobacteria.Enterobacteriales.Enterobacteriaceae.Enterobacter               | 0           |  |
| Bacteria.Proteobacteria.Gammaproteobacteria.Enterobacteriales.Enterobacteriaceae.Erwinia                    | 3.932202644 |  |
| Bacteria.Proteobacteria.Gammaproteobacteria.Enterobacteriales.Enterobacteriaceae.Escherichia_Shigella       | 3.776942827 |  |
| Bacteria.Proteobacteria.Gammaproteobacteria.Enterobacteriales.Enterobacteriaceae.Klebsiella                 | 3.735951079 |  |
| Bacteria.Proteobacteria.Gammaproteobacteria.Enterobacteriales.Enterobacteriaceae.Kluyvera                   | 0           |  |
| Bacteria.Proteobacteria.Gammaproteobacteria.Enterobacteriales.Enterobacteriaceae.Morganella                 | 0           |  |
| Bacteria.Proteobacteria.Gammaproteobacteria.Enterobacteriales.Enterobacteriaceae.Pantoea                    | 4.06328662  |  |
| Bacteria.Proteobacteria.Gammaproteobacteria.Enterobacteriales.Enterobacteriaceae.Raoultella                 | 0           |  |
| Bacteria.Proteobacteria.Gammaproteobacteria.Enterobacteriales.Enterobacteriaceae.Serratia                   | 3.392598597 |  |
| Bacteria.Proteobacteria.Gammaproteobacteria.Enterobacteriales.Enterobacteriaceae.Trabulsisella              | 0           |  |
| Bacteria.Proteobacteria.Gammaproteobacteria.Enterobacteriales.Enterobacteriaceae.unclassified_genus         | 4.065925478 |  |
| Bacteria.Proteobacteria.Gammaproteobacteria.Enterobacteriales.Enterobacteriaceae.Yersinia                   | 0           |  |
| Bacteria.Proteobacteria.Gammaproteobacteria.Gammaproteobacteria_incertae_sedis                              | 2.776244546 |  |
| Bacteria.Proteobacteria.Gammaproteobacteria.Gammaproteobacteria_incertae_sedis.Solimonas                    | 2.776244546 |  |
| Bacteria.Proteobacteria.Gammaproteobacteria.Gammaproteobacteria_incertae_sedis.Solimonas.unclassified_genus | 2.776244546 |  |
| Bacteria.Proteobacteria.Gammaproteobacteria.Legionellales                                                   | 0           |  |
| Bacteria.Proteobacteria.Gammaproteobacteria.Legionellales.Coxiellaceae                                      | 0           |  |
| Bacteria.Proteobacteria.Gammaproteobacteria.Legionellales.Coxiellaceae.Aquicella                            | 0           |  |
| Bacteria.Proteobacteria.Gammaproteobacteria.Legionellales.Legionellaceae                                    | 0           |  |
| Bacteria.Proteobacteria.Gammaproteobacteria.Legionellales.Legionellaceae.Legionella                         | 0           |  |
| Bacteria.Proteobacteria.Gammaproteobacteria.Legionellales.Legionellaceae.unclassified_genus                 | 0           |  |
| Bacteria.Proteobacteria.Gammaproteobacteria.Oceanospirillales                                               | 0           |  |
| Bacteria.Proteobacteria.Gammaproteobacteria.Oceanospirillales.Halomonadaceae                                | 0           |  |
| Bacteria.Proteobacteria.Gammaproteobacteria.Oceanospirillales.Halomonadaceae.Halomonas                      | 0           |  |
| Bacteria.Proteobacteria.Gammaproteobacteria.Pasteurellales                                                  | 0           |  |
| Bacteria.Proteobacteria.Gammaproteobacteria.Pasteurellales.Pasteurellaceae                                  | 0           |  |
| Bacteria.Proteobacteria.Gammaproteobacteria.Pasteurellales.Pasteurellaceae.Actinobacillus                   | 0           |  |
| Bacteria.Proteobacteria.Gammaproteobacteria.Pasteurellales.Pasteurellaceae.Agregatibacter                   | 0           |  |
| Bacteria.Proteobacteria.Gammaproteobacteria.Pasteurellales.Pasteurellaceae.Haemophilus                      | 0           |  |
| Bacteria.Proteobacteria.Gammaproteobacteria.Pasteurellales.Pasteurellaceae.Pasteurella                      | 0           |  |
| Bacteria.Proteobacteria.Gammaproteobacteria.Pasteurellales.Pasteurellaceae.unclassified_genus               | 0           |  |
| Bacteria.Proteobacteria.Gammaproteobacteria.Pseudomonadales                                                 | 4.979802458 |  |
| Bacteria.Proteobacteria.Gammaproteobacteria.Pseudomonadales.Moraxellaceae                                   | 4.902592569 |  |
| Bacteria.Proteobacteria.Gammaproteobacteria.Pseudomonadales.Moraxellaceae.Acinetobacter                     | 4.800960111 |  |
| Bacteria.Proteobacteria.Gammaproteobacteria.Pseudomonadales.Moraxellaceae.Alkanindiges                      | 0           |  |
| Bacteria.Proteobacteria.Gammaproteobacteria.Pseudomonadales.Moraxellaceae.Enhydrobacter                     | 3.941063178 |  |
| Bacteria.Proteobacteria.Gammaproteobacteria.Pseudomonadales.Moraxellaceae.Moraxella                         | 0           |  |
| Bacteria.Proteobacteria.Gammaproteobacteria.Pseudomonadales.Moraxellaceae.Perlucidibaca                     | 0           |  |
| Bacteria.Proteobacteria.Gammaproteobacteria.Pseudomonadales.Moraxellaceae.Psychrobacter                     | 0           |  |
| Bacteria.Proteobacteria.Gammaproteobacteria.Pseudomonadales.Moraxellaceae.unclassified_genus                | 3.899933385 |  |
| Bacteria.Proteobacteria.Gammaproteobacteria.Pseudomonadales.Pseudomonadaceae                                | 4.408901264 |  |
| Bacteria.Proteobacteria.Gammaproteobacteria.Pseudomonadales.Pseudomonadaceae.Azorhizophilus                 | 0           |  |
| Bacteria.Proteobacteria.Gammaproteobacteria.Pseudomonadales.Pseudomonadaceae.Celivibrio                     | 0           |  |
| Bacteria.Proteobacteria.Gammaproteobacteria.Pseudomonadales.Pseudomonadaceae.Pseudomonas                    | 4.376590197 |  |
| Bacteria.Proteobacteria.Gammaproteobacteria.Pseudomonadales.Pseudomonadaceae.unclassified_genus             | 3.264412884 |  |
| Bacteria.Proteobacteria.Gammaproteobacteria.Pseudomonadales.unclassified_family                             | 0           |  |
| Bacteria.Proteobacteria.Gammaproteobacteria.Pseudomonadales.unclassified_family.unclassified_genus          | 0           |  |
| Bacteria.Proteobacteria.Gammaproteobacteria.Salinisphaerales                                                | 0           |  |
| Bacteria.Proteobacteria.Gammaproteobacteria.Salinisphaerales.Salinisphaeraceae                              | 0           |  |
| Bacteria.Proteobacteria.Gammaproteobacteria.Salinisphaerales.Salinisphaeraceae.Salinisphaera                | 0           |  |
| Bacteria.Proteobacteria.Gammaproteobacteria.unclassified_order                                              | 0           |  |
| Bacteria.Proteobacteria.Gammaproteobacteria.unclassified_order.unclassified_family                          | 0           |  |
| Bacteria.Proteobacteria.Gammaproteobacteria.unclassified_order.unclassified_family.unclassified_genus       | 0           |  |
| Bacteria.Proteobacteria.Gammaproteobacteria.Vibrionales                                                     | 0           |  |
| Bacteria.Proteobacteria.Gammaproteobacteria.Vibrionales.Vibrionaceae                                        | 0           |  |
| Bacteria.Proteobacteria.Gammaproteobacteria.Vibrionales.Vibrionaceae.Photobacterium                         | 0           |  |
| Bacteria.Proteobacteria.Gammaproteobacteria.Vibrionales.Vibrionaceae.unclassified_genus                     | 0           |  |
| Bacteria.Proteobacteria.Gammaproteobacteria.Vibrionales.Vibrionaceae.Vibrio                                 | 0           |  |
| Bacteria.Proteobacteria.Gammaproteobacteria.Xanthomonadales                                                 | 2.785686103 |  |
| Bacteria.Proteobacteria.Gammaproteobacteria.Xanthomonadales.Sinobacteraceae                                 | 0           |  |
| Bacteria.Proteobacteria.Gammaproteobacteria.Xanthomonadales.Sinobacteraceae.Steroidobacter                  | 0           |  |
| Bacteria.Proteobacteria.Gammaproteobacteria.Xanthomonadales.Xanthomonadaceae                                | 2.785686103 |  |
| Bacteria.Proteobacteria.Gammaproteobacteria.Xanthomonadales.Xanthomonadaceae.Lysobacter                     | 0           |  |
| Bacteria.Proteobacteria.Gammaproteobacteria.Xanthomonadales.Xanthomonadaceae.Pseudoxanthomonas              | 0           |  |
| Bacteria.Proteobacteria.Gammaproteobacteria.Xanthomonadales.Xanthomonadaceae.Stenotrophomonas               | 2.785686103 |  |
| Bacteria.Proteobacteria.Gammaproteobacteria.Xanthomonadales.Xanthomonadaceae.unclassified_genus             | 0           |  |
| Bacteria.Proteobacteria.Gammaproteobacteria.Xanthomonadales.Xanthomonadaceae.Wohlfahrtimonas                | 0           |  |
| Bacteria.Proteobacteria.Gammaproteobacteria.Xanthomonadales.Xanthomonadaceae.Xanthomonas                    | 0           |  |
| Bacteria.Proteobacteria.unclassified_class                                                                  | 0           |  |
| Bacteria.Proteobacteria.unclassified_class.unclassified_order                                               | 0           |  |
| Bacteria.Proteobacteria.unclassified_class.unclassified_order.unclassified_family                           | 0           |  |
| Bacteria.Proteobacteria.unclassified_class.unclassified_order.unclassified_family.unclassified_genus        | 0           |  |
| Bacteria.Spirochaetes                                                                                       | 0           |  |
| Bacteria.Spirochaetes.Spirochaetes                                                                          | 0           |  |
| Bacteria.Spirochaetes.Spirochaetes.Spirochaetales                                                           | 0           |  |
| Bacteria.Spirochaetes.Spirochaetes.Spirochaetales.Spirochaetaeaceae                                         | 0           |  |
| Bacteria.Spirochaetes.Spirochaetes.Spirochaetales.Spirochaetaeaceae.Treponema                               | 0           |  |
| Bacteria.SR1                                                                                                | 0           |  |

|                                                                                                                     |             |  |  |
|---------------------------------------------------------------------------------------------------------------------|-------------|--|--|
| Bacteria.SR1.SR1_genera_incertae_sedis                                                                              | 0           |  |  |
| Bacteria.SR1.SR1_genera_incertae_sedis.unclassified_order                                                           | 0           |  |  |
| Bacteria.SR1.SR1_genera_incertae_sedis.unclassified_order.unclassified_family                                       | 0           |  |  |
| Bacteria.SR1.SR1_genera_incertae_sedis.unclassified_order.unclassified_family.unclassified_genus                    | 0           |  |  |
| Bacteria.Synergistetes                                                                                              | 0           |  |  |
| Bacteria.Synergistetes.Synergistia                                                                                  | 0           |  |  |
| Bacteria.Synergistetes.Synergistia.Synergistales                                                                    | 0           |  |  |
| Bacteria.Synergistetes.Synergistia.Synergistales.Synergistaceae                                                     | 0           |  |  |
| Bacteria.Synergistetes.Synergistia.Synergistales.Synergistaceae.unclassified_genus                                  | 0           |  |  |
| Bacteria.Tenericutes                                                                                                | 0           |  |  |
| Bacteria.Tenericutes.Mollicutes                                                                                     | 0           |  |  |
| Bacteria.Tenericutes.Mollicutes.Anaeroplasmatales                                                                   | 0           |  |  |
| Bacteria.Tenericutes.Mollicutes.Anaeroplasmatales.Anaeroplasmataceae                                                | 0           |  |  |
| Bacteria.Tenericutes.Mollicutes.Anaeroplasmatales.Anaeroplasmataceae.Anaeroplasma                                   | 0           |  |  |
| Bacteria.Tenericutes.Mollicutes.Mycoplasmatales                                                                     | 0           |  |  |
| Bacteria.Tenericutes.Mollicutes.Mycoplasmatales.Mycoplasmataceae                                                    | 0           |  |  |
| Bacteria.Tenericutes.Mollicutes.Mycoplasmatales.Mycoplasmataceae.Mycoplasma                                         | 0           |  |  |
| Bacteria.TM7                                                                                                        | 0           |  |  |
| Bacteria.TM7.TM7_genera_incertae_sedis                                                                              | 0           |  |  |
| Bacteria.TM7.TM7_genera_incertae_sedis.unclassified_order                                                           | 0           |  |  |
| Bacteria.TM7.TM7_genera_incertae_sedis.unclassified_order.unclassified_family                                       | 0           |  |  |
| Bacteria.TM7.TM7_genera_incertae_sedis.unclassified_order.unclassified_family.unclassified_genus                    | 0           |  |  |
| Bacteria.unclassified_phylum                                                                                        | 4.264806768 |  |  |
| Bacteria.unclassified_phylum.unclassified_class                                                                     | 4.264806768 |  |  |
| Bacteria.unclassified_phylum.unclassified_class.unclassified_order                                                  | 4.264806768 |  |  |
| Bacteria.unclassified_phylum.unclassified_class.unclassified_order.unclassified_family                              | 4.264806768 |  |  |
| Bacteria.unclassified_phylum.unclassified_class.unclassified_order.unclassified_family.unclassified_genus           | 4.264806768 |  |  |
| Bacteria.Verrucomicrobia                                                                                            | 0           |  |  |
| Bacteria.Verrucomicrobia.Opitutae                                                                                   | 0           |  |  |
| Bacteria.Verrucomicrobia.Opitutae.Opitutales                                                                        | 0           |  |  |
| Bacteria.Verrucomicrobia.Opitutae.Opitutales.Opitutaceae                                                            | 0           |  |  |
| Bacteria.Verrucomicrobia.Opitutae.Opitutales.Opitutaceae.Opitutus                                                   | 0           |  |  |
| Bacteria.Verrucomicrobia.Spartobacteria                                                                             | 0           |  |  |
| Bacteria.Verrucomicrobia.Spartobacteria.Spartobacteria_genera_incertae_sedis                                        | 0           |  |  |
| Bacteria.Verrucomicrobia.Spartobacteria.Spartobacteria_genera_incertae_sedis.unclassified_family                    | 0           |  |  |
| Bacteria.Verrucomicrobia.Spartobacteria.Spartobacteria_genera_incertae_sedis.unclassified_family.unclassified_genus | 0           |  |  |
| Bacteria.Verrucomicrobia.unclassified_class                                                                         | 0           |  |  |
| Bacteria.Verrucomicrobia.unclassified_class.unclassified_order                                                      | 0           |  |  |
| Bacteria.Verrucomicrobia.unclassified_class.unclassified_order.unclassified_family                                  | 0           |  |  |
| Bacteria.Verrucomicrobia.unclassified_class.unclassified_order.unclassified_family.unclassified_genus               | 0           |  |  |
| Bacteria.Verrucomicrobia.Verrucomicrobiae                                                                           | 0           |  |  |
| Bacteria.Verrucomicrobia.Verrucomicrobiae.Verrucomicrobiales                                                        | 0           |  |  |
| Bacteria.Verrucomicrobia.Verrucomicrobiae.Verrucomicrobiales.Verrucomicrobiaceae                                    | 0           |  |  |
| Bacteria.Verrucomicrobia.Verrucomicrobiae.Verrucomicrobiales.Verrucomicrobiaceae.Akkermansia                        | 0           |  |  |

Footnotes:

1. Taxonomic assignment determined using RDP classifier to compare a representative sequence from each OTU to reference sequences in the greengenes database.



|                                                                                                   |             |  |  |
|---------------------------------------------------------------------------------------------------|-------------|--|--|
| Bacteria.Actinobacteria.Actinobacteria.Actinomycetales.Micrococcaceae.Arthrobacter                | 3.101274818 |  |  |
| Bacteria.Actinobacteria.Actinobacteria.Actinomycetales.Micrococcaceae.Kocuria                     | 0           |  |  |
| Bacteria.Actinobacteria.Actinobacteria.Actinomycetales.Micrococcaceae.Micrococcus                 | 0           |  |  |
| Bacteria.Actinobacteria.Actinobacteria.Actinomycetales.Micrococcaceae.Nesterenkonia               | 0           |  |  |
| Bacteria.Actinobacteria.Actinobacteria.Actinomycetales.Micrococcaceae.Rothia                      | 0           |  |  |
| Bacteria.Actinobacteria.Actinobacteria.Actinomycetales.Micrococcaceae.unclassified_genus          | 0           |  |  |
| Bacteria.Actinobacteria.Actinobacteria.Actinomycetales.Micromonosporaceae                         | 0           |  |  |
| Bacteria.Actinobacteria.Actinobacteria.Actinomycetales.Micromonosporaceae.Luedemannella           | 0           |  |  |
| Bacteria.Actinobacteria.Actinobacteria.Actinomycetales.Micromonosporaceae.Micromonospora          | 0           |  |  |
| Bacteria.Actinobacteria.Actinobacteria.Actinomycetales.Mycobacteriaceae                           | 0           |  |  |
| Bacteria.Actinobacteria.Actinobacteria.Actinomycetales.Mycobacteriaceae.Mycobacterium             | 0           |  |  |
| Bacteria.Actinobacteria.Actinobacteria.Actinomycetales.Nocardiaceae                               | 0           |  |  |
| Bacteria.Actinobacteria.Actinobacteria.Actinomycetales.Nocardiaceae.Gordonia                      | 0           |  |  |
| Bacteria.Actinobacteria.Actinobacteria.Actinomycetales.Nocardiaceae.Rhodococcus                   | 0           |  |  |
| Bacteria.Actinobacteria.Actinobacteria.Actinomycetales.Nocardiaceae.unclassified_genus            | 0           |  |  |
| Bacteria.Actinobacteria.Actinobacteria.Actinomycetales.Nocardiaceae.Williamsia                    | 0           |  |  |
| Bacteria.Actinobacteria.Actinobacteria.Actinomycetales.Nocardioidaceae                            | 0           |  |  |
| Bacteria.Actinobacteria.Actinobacteria.Actinomycetales.Nocardioidaceae.Aeromicrobium              | 0           |  |  |
| Bacteria.Actinobacteria.Actinobacteria.Actinomycetales.Nocardioidaceae.Marmoricola                | 0           |  |  |
| Bacteria.Actinobacteria.Actinobacteria.Actinomycetales.Nocardioidaceae.Nocardioides               | 0           |  |  |
| Bacteria.Actinobacteria.Actinobacteria.Actinomycetales.Nocardioidaceae.Pimelobacter               | 0           |  |  |
| Bacteria.Actinobacteria.Actinobacteria.Actinomycetales.Nocardioidaceae.unclassified_genus         | 0           |  |  |
| Bacteria.Actinobacteria.Actinobacteria.Actinomycetales.Nocardiopsaceae                            | 0           |  |  |
| Bacteria.Actinobacteria.Actinobacteria.Actinomycetales.Nocardiopsaceae.Nocardiopsis               | 0           |  |  |
| Bacteria.Actinobacteria.Actinobacteria.Actinomycetales.Nocardiopsaceae.unclassified_genus         | 0           |  |  |
| Bacteria.Actinobacteria.Actinobacteria.Actinomycetales.Propionibacteriaceae                       | 0           |  |  |
| Bacteria.Actinobacteria.Actinobacteria.Actinomycetales.Propionibacteriaceae.Friedmannella         | 0           |  |  |
| Bacteria.Actinobacteria.Actinobacteria.Actinomycetales.Propionibacteriaceae.Microlunatus          | 0           |  |  |
| Bacteria.Actinobacteria.Actinobacteria.Actinomycetales.Propionibacteriaceae.Propionibacterium     | 0           |  |  |
| Bacteria.Actinobacteria.Actinobacteria.Actinomycetales.Propionibacteriaceae.unclassified_genus    | 0           |  |  |
| Bacteria.Actinobacteria.Actinobacteria.Actinomycetales.Pseudonocardiaceae                         | 0           |  |  |
| Bacteria.Actinobacteria.Actinobacteria.Actinomycetales.Pseudonocardiaceae.Actinomycetospora       | 0           |  |  |
| Bacteria.Actinobacteria.Actinobacteria.Actinomycetales.Pseudonocardiaceae.Pseudonocardia          | 0           |  |  |
| Bacteria.Actinobacteria.Actinobacteria.Actinomycetales.Pseudonocardiaceae.Saccharopolyspora       | 0           |  |  |
| Bacteria.Actinobacteria.Actinobacteria.Actinomycetales.Pseudonocardiaceae.unclassified_genus      | 0           |  |  |
| Bacteria.Actinobacteria.Actinobacteria.Actinomycetales.Sanguibacteraceae                          | 0           |  |  |
| Bacteria.Actinobacteria.Actinobacteria.Actinomycetales.Sanguibacteraceae.Sanguibacter             | 0           |  |  |
| Bacteria.Actinobacteria.Actinobacteria.Actinomycetales.Streptomycetaceae                          | 0           |  |  |
| Bacteria.Actinobacteria.Actinobacteria.Actinomycetales.Streptomycetaceae.Streptomyces             | 0           |  |  |
| Bacteria.Actinobacteria.Actinobacteria.Actinomycetales.Streptomycetaceae.unclassified_genus       | 0           |  |  |
| Bacteria.Actinobacteria.Actinobacteria.Actinomycetales.unclassified_family                        | 0           |  |  |
| Bacteria.Actinobacteria.Actinobacteria.Actinomycetales.unclassified_family.unclassified_genus     | 0           |  |  |
| Bacteria.Actinobacteria.Actinobacteria.Actinomycetales.Yaniellaceae                               | 0           |  |  |
| Bacteria.Actinobacteria.Actinobacteria.Actinomycetales.Yaniellaceae.Yaniella                      | 0           |  |  |
| Bacteria.Actinobacteria.Actinobacteria.Bifidobacteriales                                          | 0           |  |  |
| Bacteria.Actinobacteria.Actinobacteria.Bifidobacteriales.Bifidobacteriaceae                       | 0           |  |  |
| Bacteria.Actinobacteria.Actinobacteria.Bifidobacteriales.Bifidobacteriaceae.Aeriscardovia         | 0           |  |  |
| Bacteria.Actinobacteria.Actinobacteria.Bifidobacteriales.Bifidobacteriaceae.Bifidobacterium       | 0           |  |  |
| Bacteria.Actinobacteria.Actinobacteria.Bifidobacteriales.Bifidobacteriaceae.unclassified_genus    | 0           |  |  |
| Bacteria.Actinobacteria.Actinobacteria.Coriobacteriales                                           | 0           |  |  |
| Bacteria.Actinobacteria.Actinobacteria.Coriobacteriales.Coriobacteriaceae                         | 0           |  |  |
| Bacteria.Actinobacteria.Actinobacteria.Coriobacteriales.Coriobacteriaceae.Asaccharobacter         | 0           |  |  |
| Bacteria.Actinobacteria.Actinobacteria.Coriobacteriales.Coriobacteriaceae.Atopobium               | 0           |  |  |
| Bacteria.Actinobacteria.Actinobacteria.Coriobacteriales.Coriobacteriaceae.Collinsella             | 0           |  |  |
| Bacteria.Actinobacteria.Actinobacteria.Coriobacteriales.Coriobacteriaceae.Eggerthella             | 0           |  |  |
| Bacteria.Actinobacteria.Actinobacteria.Coriobacteriales.Coriobacteriaceae.Olsenella               | 0           |  |  |
| Bacteria.Actinobacteria.Actinobacteria.Coriobacteriales.Coriobacteriaceae.Paraeggerthella         | 0           |  |  |
| Bacteria.Actinobacteria.Actinobacteria.Coriobacteriales.Coriobacteriaceae.unclassified_genus      | 0           |  |  |
| Bacteria.Actinobacteria.Actinobacteria.Rubrobacterales                                            | 0           |  |  |
| Bacteria.Actinobacteria.Actinobacteria.Rubrobacterales.Rubrobacteraceae                           | 0           |  |  |
| Bacteria.Actinobacteria.Actinobacteria.Rubrobacterales.Rubrobacteraceae.Rubrobacter               | 0           |  |  |
| Bacteria.Actinobacteria.Actinobacteria.Solirubrobacterales                                        | 0           |  |  |
| Bacteria.Actinobacteria.Actinobacteria.Solirubrobacterales.Conexibacteraceae                      | 0           |  |  |
| Bacteria.Actinobacteria.Actinobacteria.Solirubrobacterales.Conexibacteraceae.Conexibacter         | 0           |  |  |
| Bacteria.Actinobacteria.Actinobacteria.Solirubrobacterales.Solirubrobacteraceae                   | 0           |  |  |
| Bacteria.Actinobacteria.Actinobacteria.Solirubrobacterales.Solirubrobacteraceae.Solirubrobacter   | 0           |  |  |
| Bacteria.Actinobacteria.Actinobacteria.Solirubrobacterales.unclassified_family                    | 0           |  |  |
| Bacteria.Actinobacteria.Actinobacteria.Solirubrobacterales.unclassified_family.unclassified_genus | 0           |  |  |
| Bacteria.Actinobacteria.Actinobacteria.unclassified_order                                         | 0           |  |  |
| Bacteria.Actinobacteria.Actinobacteria.unclassified_order.unclassified_family                     | 0           |  |  |
| Bacteria.Actinobacteria.Actinobacteria.unclassified_order.unclassified_family.unclassified_genus  | 0           |  |  |
| Bacteria.Aquificae                                                                                | 0           |  |  |
| Bacteria.Aquificae.Aquificae                                                                      | 0           |  |  |
| Bacteria.Aquificae.Aquificae.Aquificales                                                          | 0           |  |  |
| Bacteria.Aquificae.Aquificae.Aquificales.Hydrogenothermaceae                                      | 0           |  |  |
| Bacteria.Aquificae.Aquificae.Aquificales.Hydrogenothermaceae.Sulfurihydrogenibium                 | 0           |  |  |
| Bacteria.Bacteroidetes                                                                            | 4.216231133 |  |  |
| Bacteria.Bacteroidetes.Bacteroidia                                                                | 0           |  |  |
| Bacteria.Bacteroidetes.Bacteroidia.Bacteroidales                                                  | 0           |  |  |
| Bacteria.Bacteroidetes.Bacteroidia.Bacteroidales.Bacteroidaceae                                   | 0           |  |  |
| Bacteria.Bacteroidetes.Bacteroidia.Bacteroidales.Bacteroidaceae.Bacteroides                       | 0           |  |  |
| Bacteria.Bacteroidetes.Bacteroidia.Bacteroidales.Porphyrimonadaceae                               | 0           |  |  |
| Bacteria.Bacteroidetes.Bacteroidia.Bacteroidales.Porphyrimonadaceae.Dysgonomonas                  | 0           |  |  |
| Bacteria.Bacteroidetes.Bacteroidia.Bacteroidales.Porphyrimonadaceae.Porphyrimonas                 | 0           |  |  |
| Bacteria.Bacteroidetes.Bacteroidia.Bacteroidales.Porphyrimonadaceae.Proteiniphilum                | 0           |  |  |
| Bacteria.Bacteroidetes.Bacteroidia.Bacteroidales.Porphyrimonadaceae.unclassified_genus            | 0           |  |  |
| Bacteria.Bacteroidetes.Bacteroidia.Bacteroidales.Prevotellaceae                                   | 0           |  |  |
| Bacteria.Bacteroidetes.Bacteroidia.Bacteroidales.Prevotellaceae.Hallella                          | 0           |  |  |
| Bacteria.Bacteroidetes.Bacteroidia.Bacteroidales.Prevotellaceae.Prevotella                        | 0           |  |  |
| Bacteria.Bacteroidetes.Bacteroidia.Bacteroidales.Prevotellaceae.unclassified_genus                | 0           |  |  |
| Bacteria.Bacteroidetes.Bacteroidia.Bacteroidales.unclassified_family                              | 0           |  |  |
| Bacteria.Bacteroidetes.Bacteroidia.Bacteroidales.unclassified_family.unclassified_genus           | 0           |  |  |
| Bacteria.Bacteroidetes.Flavobacteria                                                              | 4.216231133 |  |  |
| Bacteria.Bacteroidetes.Flavobacteria.Flavobacteriales                                             | 4.216231133 |  |  |
| Bacteria.Bacteroidetes.Flavobacteria.Flavobacteriales.Cryomorphaceae                              | 0           |  |  |
| Bacteria.Bacteroidetes.Flavobacteria.Flavobacteriales.Cryomorphaceae.Fluvicola                    | 0           |  |  |
| Bacteria.Bacteroidetes.Flavobacteria.Flavobacteriales.Flavobacteriaceae                           | 4.216231133 |  |  |
| Bacteria.Bacteroidetes.Flavobacteria.Flavobacteriales.Flavobacteriaceae.Capnocytophaga            | 0           |  |  |
| Bacteria.Bacteroidetes.Flavobacteria.Flavobacteriales.Flavobacteriaceae.Chryseobacterium          | 4.105452614 |  |  |
| Bacteria.Bacteroidetes.Flavobacteria.Flavobacteriales.Flavobacteriaceae.Cloacibacterium           | 3.568689856 |  |  |
| Bacteria.Bacteroidetes.Flavobacteria.Flavobacteriales.Flavobacteriaceae.Flavobacterium            | 0           |  |  |
| Bacteria.Bacteroidetes.Flavobacteria.Flavobacteriales.Flavobacteriaceae.Myroides                  | 0           |  |  |
| Bacteria.Bacteroidetes.Flavobacteria.Flavobacteriales.Flavobacteriaceae.Riemerella                | 0           |  |  |

|                                                                                                     |             |  |
|-----------------------------------------------------------------------------------------------------|-------------|--|
| Bacteria.Bacteroidetes.Flavobacteria.Flavobacteriales.Flavobacteriaceae.Salinimicrobium             | 0           |  |
| Bacteria.Bacteroidetes.Flavobacteria.Flavobacteriales.Flavobacteriaceae.unclassified_genus          | 0           |  |
| Bacteria.Bacteroidetes.Flavobacteria.Flavobacteriales.Flavobacteriaceae.Wautersiella                | 0           |  |
| Bacteria.Bacteroidetes.Flavobacteria.Flavobacteriales.unclassified_family                           | 0           |  |
| Bacteria.Bacteroidetes.Flavobacteria.Flavobacteriales.unclassified_family.unclassified_genus        | 0           |  |
| Bacteria.Bacteroidetes.Sphingobacteria                                                              | 3.101274818 |  |
| Bacteria.Bacteroidetes.Sphingobacteria.Sphingobacteriales                                           | 3.101274818 |  |
| Bacteria.Bacteroidetes.Sphingobacteria.Sphingobacteriales.Chitinophagaceae                          | 0           |  |
| Bacteria.Bacteroidetes.Sphingobacteria.Sphingobacteriales.Chitinophagaceae.Ferruginibacter          | 0           |  |
| Bacteria.Bacteroidetes.Sphingobacteria.Sphingobacteriales.Chitinophagaceae.Filimonas                | 0           |  |
| Bacteria.Bacteroidetes.Sphingobacteria.Sphingobacteriales.Chitinophagaceae.Flavisolibacter          | 0           |  |
| Bacteria.Bacteroidetes.Sphingobacteria.Sphingobacteriales.Chitinophagaceae.unclassified_genus       | 0           |  |
| Bacteria.Bacteroidetes.Sphingobacteria.Sphingobacteriales.Cytophagaceae                             | 0           |  |
| Bacteria.Bacteroidetes.Sphingobacteria.Sphingobacteriales.Cytophagaceae.Adhaeribacter               | 0           |  |
| Bacteria.Bacteroidetes.Sphingobacteria.Sphingobacteriales.Cytophagaceae.Cytophaga                   | 0           |  |
| Bacteria.Bacteroidetes.Sphingobacteria.Sphingobacteriales.Cytophagaceae.Dyadobacter                 | 0           |  |
| Bacteria.Bacteroidetes.Sphingobacteria.Sphingobacteriales.Cytophagaceae.Emticicia                   | 0           |  |
| Bacteria.Bacteroidetes.Sphingobacteria.Sphingobacteriales.Cytophagaceae.Flectobacillus              | 0           |  |
| Bacteria.Bacteroidetes.Sphingobacteria.Sphingobacteriales.Cytophagaceae.Hymenobacter                | 0           |  |
| Bacteria.Bacteroidetes.Sphingobacteria.Sphingobacteriales.Cytophagaceae.Pontibacter                 | 0           |  |
| Bacteria.Bacteroidetes.Sphingobacteria.Sphingobacteriales.Cytophagaceae.Runella                     | 0           |  |
| Bacteria.Bacteroidetes.Sphingobacteria.Sphingobacteriales.Cytophagaceae.Sporocytophaga              | 0           |  |
| Bacteria.Bacteroidetes.Sphingobacteria.Sphingobacteriales.Cytophagaceae.unclassified_genus          | 0           |  |
| Bacteria.Bacteroidetes.Sphingobacteria.Sphingobacteriales.Sphingobacteriaceae                       | 3.101274818 |  |
| Bacteria.Bacteroidetes.Sphingobacteria.Sphingobacteriales.Sphingobacteriaceae.Nubsella              | 0           |  |
| Bacteria.Bacteroidetes.Sphingobacteria.Sphingobacteriales.Sphingobacteriaceae.Pedobacter            | 0           |  |
| Bacteria.Bacteroidetes.Sphingobacteria.Sphingobacteriales.Sphingobacteriaceae.Sphingobacterium      | 3.101274818 |  |
| Bacteria.Bacteroidetes.Sphingobacteria.Sphingobacteriales.Sphingobacteriaceae.unclassified_genus    | 0           |  |
| Bacteria.Bacteroidetes.Sphingobacteria.Sphingobacteriales.unclassified_family                       | 0           |  |
| Bacteria.Bacteroidetes.Sphingobacteria.Sphingobacteriales.unclassified_family.unclassified_genus    | 0           |  |
| Bacteria.Bacteroidetes.unclassified_class                                                           | 0           |  |
| Bacteria.Bacteroidetes.unclassified_class.unclassified_order                                        | 0           |  |
| Bacteria.Bacteroidetes.unclassified_class.unclassified_order.unclassified_family                    | 0           |  |
| Bacteria.Bacteroidetes.unclassified_class.unclassified_order.unclassified_family.unclassified_genus | 0           |  |
| Bacteria.Chloroflexi                                                                                | 0           |  |
| Bacteria.Chloroflexi.Anaerolineae                                                                   | 0           |  |
| Bacteria.Chloroflexi.Anaerolineae.Anaerolineales                                                    | 0           |  |
| Bacteria.Chloroflexi.Anaerolineae.Anaerolineales.Anaerolineaceae                                    | 0           |  |
| Bacteria.Chloroflexi.Anaerolineae.Anaerolineales.Anaerolineaceae.unclassified_genus                 | 0           |  |
| Bacteria.Chloroflexi.Caldilineae                                                                    | 0           |  |
| Bacteria.Chloroflexi.Caldilineae.Caldilineales                                                      | 0           |  |
| Bacteria.Chloroflexi.Caldilineae.Caldilineales.Caldilineaceae                                       | 0           |  |
| Bacteria.Chloroflexi.Caldilineae.Caldilineales.Caldilineaceae.Caldilinea                            | 0           |  |
| Bacteria.Chloroflexi.Thermomicrobia                                                                 | 0           |  |
| Bacteria.Chloroflexi.Thermomicrobia.Sphaerobacteriales                                              | 0           |  |
| Bacteria.Chloroflexi.Thermomicrobia.Sphaerobacteriales.Sphaerobacteraceae                           | 0           |  |
| Bacteria.Chloroflexi.Thermomicrobia.Sphaerobacteriales.Sphaerobacteraceae.Sphaerobacter             | 0           |  |
| Bacteria.Chloroflexi.Thermomicrobia.unclassified_order                                              | 0           |  |
| Bacteria.Chloroflexi.Thermomicrobia.unclassified_order.unclassified_family                          | 0           |  |
| Bacteria.Chloroflexi.Thermomicrobia.unclassified_order.unclassified_family.unclassified_genus       | 0           |  |
| Bacteria.Chloroflexi.unclassified_class                                                             | 0           |  |
| Bacteria.Chloroflexi.unclassified_class.unclassified_order                                          | 0           |  |
| Bacteria.Chloroflexi.unclassified_class.unclassified_order.unclassified_family                      | 0           |  |
| Bacteria.Chloroflexi.unclassified_class.unclassified_order.unclassified_family.unclassified_genus   | 0           |  |
| Bacteria.Deinococcus_Thermus                                                                        | 0           |  |
| Bacteria.Deinococcus_Thermus.Deinococci                                                             | 0           |  |
| Bacteria.Deinococcus_Thermus.Deinococci.Deinococcales                                               | 0           |  |
| Bacteria.Deinococcus_Thermus.Deinococci.Deinococcales.Deinococcaceae                                | 0           |  |
| Bacteria.Deinococcus_Thermus.Deinococci.Deinococcales.Deinococcaceae.Deinococcus                    | 0           |  |
| Bacteria.Deinococcus_Thermus.Deinococci.Deinococcales.Trueperaceae                                  | 0           |  |
| Bacteria.Deinococcus_Thermus.Deinococci.Deinococcales.Trueperaceae.Truepera                         | 0           |  |
| Bacteria.Deinococcus_Thermus.Deinococci.Thermales                                                   | 0           |  |
| Bacteria.Deinococcus_Thermus.Deinococci.Thermales.Thermaceae                                        | 0           |  |
| Bacteria.Deinococcus_Thermus.Deinococci.Thermales.Thermaceae.Meiothermus                            | 0           |  |
| Bacteria.Deinococcus_Thermus.Deinococci.unclassified_order                                          | 0           |  |
| Bacteria.Deinococcus_Thermus.Deinococci.unclassified_order.unclassified_family                      | 0           |  |
| Bacteria.Deinococcus_Thermus.Deinococci.unclassified_order.unclassified_family.unclassified_genus   | 0           |  |
| Bacteria.Firmicutes                                                                                 | 5.749572879 |  |
| Bacteria.Firmicutes.Bacilli                                                                         | 5.732048228 |  |
| Bacteria.Firmicutes.Bacilli.Bacillales                                                              | 4.081764903 |  |
| Bacteria.Firmicutes.Bacilli.Bacillales.Alicyclobacillaceae                                          | 0           |  |
| Bacteria.Firmicutes.Bacilli.Bacillales.Alicyclobacillaceae.Alicyclobacillus                         | 0           |  |
| Bacteria.Firmicutes.Bacilli.Bacillales.Bacillaceae                                                  | 3.986540003 |  |
| Bacteria.Firmicutes.Bacilli.Bacillales.Bacillaceae.Anoxybacillus                                    | 0           |  |
| Bacteria.Firmicutes.Bacilli.Bacillales.Bacillaceae.Bacillus                                         | 3.93007205  |  |
| Bacteria.Firmicutes.Bacilli.Bacillales.Bacillaceae.Caldalkalibacillus                               | 0           |  |
| Bacteria.Firmicutes.Bacilli.Bacillales.Bacillaceae.Cerasibacillus                                   | 0           |  |
| Bacteria.Firmicutes.Bacilli.Bacillales.Bacillaceae.Exiguobacterium                                  | 0           |  |
| Bacteria.Firmicutes.Bacilli.Bacillales.Bacillaceae.Geobacillus                                      | 0           |  |
| Bacteria.Firmicutes.Bacilli.Bacillales.Bacillaceae.Gracilibacillus                                  | 0           |  |
| Bacteria.Firmicutes.Bacilli.Bacillales.Bacillaceae.Lentibacillus                                    | 0           |  |
| Bacteria.Firmicutes.Bacilli.Bacillales.Bacillaceae.Lysinibacillus                                   | 0           |  |
| Bacteria.Firmicutes.Bacilli.Bacillales.Bacillaceae.Oceanobacillus                                   | 0           |  |
| Bacteria.Firmicutes.Bacilli.Bacillales.Bacillaceae.Ornithinibacillus                                | 0           |  |
| Bacteria.Firmicutes.Bacilli.Bacillales.Bacillaceae.Tenuibacillus                                    | 0           |  |
| Bacteria.Firmicutes.Bacilli.Bacillales.Bacillaceae.Terribacillus                                    | 0           |  |
| Bacteria.Firmicutes.Bacilli.Bacillales.Bacillaceae.Tumebacillus                                     | 0           |  |
| Bacteria.Firmicutes.Bacilli.Bacillales.Bacillaceae.unclassified_genus                               | 3.072629637 |  |
| Bacteria.Firmicutes.Bacilli.Bacillales.Bacillaceae.Ureibacillus                                     | 0           |  |
| Bacteria.Firmicutes.Bacilli.Bacillales.Bacillaceae.Virgibacillus                                    | 0           |  |
| Bacteria.Firmicutes.Bacilli.Bacillales.Bacillales_incertae_sedis                                    | 0           |  |
| Bacteria.Firmicutes.Bacilli.Bacillales.Bacillales_incertae_sedis.Rummeliibacillus                   | 0           |  |
| Bacteria.Firmicutes.Bacilli.Bacillales.Bacillales_incertae_sedis.Solibacillus                       | 0           |  |
| Bacteria.Firmicutes.Bacilli.Bacillales.Listeriaceae                                                 | 0           |  |
| Bacteria.Firmicutes.Bacilli.Bacillales.Listeriaceae.Brochothrix                                     | 0           |  |
| Bacteria.Firmicutes.Bacilli.Bacillales.Listeriaceae.Listeria                                        | 0           |  |
| Bacteria.Firmicutes.Bacilli.Bacillales.Paenibacillaceae                                             | 0           |  |
| Bacteria.Firmicutes.Bacilli.Bacillales.Paenibacillaceae.Ammoniphilus                                | 0           |  |
| Bacteria.Firmicutes.Bacilli.Bacillales.Paenibacillaceae.Aneurinibacillus                            | 0           |  |
| Bacteria.Firmicutes.Bacilli.Bacillales.Paenibacillaceae.Brevibacillus                               | 0           |  |
| Bacteria.Firmicutes.Bacilli.Bacillales.Paenibacillaceae.Cohnella                                    | 0           |  |
| Bacteria.Firmicutes.Bacilli.Bacillales.Paenibacillaceae.Oxalophagus                                 | 0           |  |
| Bacteria.Firmicutes.Bacilli.Bacillales.Paenibacillaceae.Paenibacillus                               | 0           |  |

|                                                                                       |             |                |             |
|---------------------------------------------------------------------------------------|-------------|----------------|-------------|
| Bacteria.Firmicutes.Bacilli.Bacillales.Paenibacillaceae.Saccharibacillus              |             | 0              |             |
| Bacteria.Firmicutes.Bacilli.Bacillales.Paenibacillaceae.unclassified_genus            |             | 0              |             |
| Bacteria.Firmicutes.Bacilli.Bacillales.Planococcaceae                                 |             | 0              |             |
| Bacteria.Firmicutes.Bacilli.Bacillales.Planococcaceae.Bhargavaea                      |             | 0              |             |
| Bacteria.Firmicutes.Bacilli.Bacillales.Planococcaceae.Kurthia                         |             | 0              |             |
| Bacteria.Firmicutes.Bacilli.Bacillales.Planococcaceae.Planococcus                     |             | 0              |             |
| Bacteria.Firmicutes.Bacilli.Bacillales.Planococcaceae.Planomicrobium                  |             | 0              |             |
| Bacteria.Firmicutes.Bacilli.Bacillales.Planococcaceae.Sporosarcina                    |             | 0              |             |
| Bacteria.Firmicutes.Bacilli.Bacillales.Planococcaceae.unclassified_genus              |             | 0              |             |
| Bacteria.Firmicutes.Bacilli.Bacillales.Staphylococcaceae                              | 3.375988295 |                |             |
| Bacteria.Firmicutes.Bacilli.Bacillales.Staphylococcaceae.Gemella                      |             | 0              |             |
| Bacteria.Firmicutes.Bacilli.Bacillales.Staphylococcaceae.Jeotgalicoccus               |             | 0              |             |
| Bacteria.Firmicutes.Bacilli.Bacillales.Staphylococcaceae.Macrococcus                  |             | 0              |             |
| Bacteria.Firmicutes.Bacilli.Bacillales.Staphylococcaceae.Nosocomiicoccus              |             | 0              |             |
| Bacteria.Firmicutes.Bacilli.Bacillales.Staphylococcaceae.Saliniicoccus                |             | 0              |             |
| Bacteria.Firmicutes.Bacilli.Bacillales.Staphylococcaceae.Staphylococcus               | 3.375988295 |                |             |
| Bacteria.Firmicutes.Bacilli.Bacillales.Thermoactinomycetaceae                         |             | 0              |             |
| Bacteria.Firmicutes.Bacilli.Bacillales.Thermoactinomycetaceae.Thermoactinomyces       |             | 0              |             |
| Bacteria.Firmicutes.Bacilli.Bacillales.Thermoactinomycetaceae.unclassified_genus      |             | 0              |             |
| Bacteria.Firmicutes.Bacilli.Bacillales.unclassified_family                            |             | 0              |             |
| Bacteria.Firmicutes.Bacilli.Bacillales.unclassified_family.unclassified_genus         |             | 0              |             |
| Bacteria.Firmicutes.Bacilli.Lactobacillales                                           | 5.727600533 |                |             |
| Bacteria.Firmicutes.Bacilli.Lactobacillales.Aerococcaceae                             |             | 0              |             |
| Bacteria.Firmicutes.Bacilli.Lactobacillales.Aerococcaceae.Abiotrophia                 |             | 0              |             |
| Bacteria.Firmicutes.Bacilli.Lactobacillales.Aerococcaceae.Aerococcus                  |             | 0              |             |
| Bacteria.Firmicutes.Bacilli.Lactobacillales.Aerococcaceae.Eremococcus                 |             | 0              |             |
| Bacteria.Firmicutes.Bacilli.Lactobacillales.Aerococcaceae.Globicatella                |             | 0              |             |
| Bacteria.Firmicutes.Bacilli.Lactobacillales.Carnobacteriaceae                         | 3.072629637 |                |             |
| Bacteria.Firmicutes.Bacilli.Lactobacillales.Carnobacteriaceae.Atopostipes             |             | 0              |             |
| Bacteria.Firmicutes.Bacilli.Lactobacillales.Carnobacteriaceae.Carnobacterium          | 3.072629637 |                |             |
| Bacteria.Firmicutes.Bacilli.Lactobacillales.Carnobacteriaceae.Desemzia                |             | 0              |             |
| Bacteria.Firmicutes.Bacilli.Lactobacillales.Carnobacteriaceae.Granulicatella          |             | 0              |             |
| Bacteria.Firmicutes.Bacilli.Lactobacillales.Carnobacteriaceae.Marinilactibacillus     |             | 0              |             |
| Bacteria.Firmicutes.Bacilli.Lactobacillales.Carnobacteriaceae.Trichococcus            |             | 0              |             |
| Bacteria.Firmicutes.Bacilli.Lactobacillales.Carnobacteriaceae.unclassified_genus      |             | 0              |             |
| Bacteria.Firmicutes.Bacilli.Lactobacillales.Enterococcaceae                           | 4.039659764 |                |             |
| Bacteria.Firmicutes.Bacilli.Lactobacillales.Enterococcaceae.Enterococcus              | 4.039659764 |                |             |
| Bacteria.Firmicutes.Bacilli.Lactobacillales.Enterococcaceae.unclassified_genus        |             | 0              |             |
| Bacteria.Firmicutes.Bacilli.Lactobacillales.Enterococcaceae.Vagococcus                |             | 0              |             |
| Bacteria.Firmicutes.Bacilli.Lactobacillales.Lactobacillaceae                          | 4.123089305 | Grain-based    | 4.138754154 |
| Bacteria.Firmicutes.Bacilli.Lactobacillales.Lactobacillaceae.Lactobacillus            | 4.123089305 | Grain-based    | 4.125163637 |
| Bacteria.Firmicutes.Bacilli.Lactobacillales.Lactobacillaceae.Pediococcus              |             | 0              |             |
| Bacteria.Firmicutes.Bacilli.Lactobacillales.Lactobacillaceae.unclassified_genus       |             | 0              |             |
| Bacteria.Firmicutes.Bacilli.Lactobacillales.Leuconostocaceae                          | 5.566018816 | Fishmeal-based | 4.45987679  |
| Bacteria.Firmicutes.Bacilli.Lactobacillales.Leuconostocaceae.Leuconostoc              | 5.016217517 |                |             |
| Bacteria.Firmicutes.Bacilli.Lactobacillales.Leuconostocaceae.unclassified_genus       | 3.556749702 |                |             |
| Bacteria.Firmicutes.Bacilli.Lactobacillales.Leuconostocaceae.Weissella                | 5.416201657 | Fishmeal-based | 4.340951048 |
| Bacteria.Firmicutes.Bacilli.Lactobacillales.Streptococcaceae                          | 5.175782145 |                |             |
| Bacteria.Firmicutes.Bacilli.Lactobacillales.Streptococcaceae.Lactococcus              | 5.112000431 |                |             |
| Bacteria.Firmicutes.Bacilli.Lactobacillales.Streptococcaceae.Streptococcus            | 4.573304732 | Grain-based    | 4.096274975 |
| Bacteria.Firmicutes.Bacilli.Lactobacillales.Streptococcaceae.unclassified_genus       | 3.559125128 |                |             |
| Bacteria.Firmicutes.Bacilli.Lactobacillales.unclassified_family                       |             | 0              |             |
| Bacteria.Firmicutes.Bacilli.Lactobacillales.unclassified_family.unclassified_genus    |             | 0              |             |
| Bacteria.Firmicutes.Bacilli.unclassified_order                                        |             | 0              |             |
| Bacteria.Firmicutes.Bacilli.unclassified_order.unclassified_family                    |             | 0              |             |
| Bacteria.Firmicutes.Bacilli.unclassified_order.unclassified_family.unclassified_genus |             | 0              |             |
| Bacteria.Firmicutes.Clostridia                                                        | 4.346705098 |                |             |
| Bacteria.Firmicutes.Clostridia.Clostridiales                                          | 4.346705098 |                |             |
| Bacteria.Firmicutes.Clostridia.Clostridiales.Clostridiaceae                           | 3.253365801 |                |             |
| Bacteria.Firmicutes.Clostridia.Clostridiales.Clostridiaceae.Clostridium               | 3.253365801 |                |             |
| Bacteria.Firmicutes.Clostridia.Clostridiales.Clostridiaceae.Thermobrachium            |             | 0              |             |
| Bacteria.Firmicutes.Clostridia.Clostridiales.Clostridiaceae.unclassified_genus        |             | 0              |             |
| Bacteria.Firmicutes.Clostridia.Clostridiales.Eubacteriaceae                           |             | 0              |             |
| Bacteria.Firmicutes.Clostridia.Clostridiales.Eubacteriaceae.Eubacterium               |             | 0              |             |
| Bacteria.Firmicutes.Clostridia.Clostridiales.Eubacteriaceae.unclassified_genus        |             | 0              |             |
| Bacteria.Firmicutes.Clostridia.Clostridiales.IncertaeSedisXI                          |             | 0              |             |
| Bacteria.Firmicutes.Clostridia.Clostridiales.IncertaeSedisXI.Anaerococcus             |             | 0              |             |
| Bacteria.Firmicutes.Clostridia.Clostridiales.IncertaeSedisXI.Anaerospaera             |             | 0              |             |
| Bacteria.Firmicutes.Clostridia.Clostridiales.IncertaeSedisXI.Finegoldia               |             | 0              |             |
| Bacteria.Firmicutes.Clostridia.Clostridiales.IncertaeSedisXI.Gallicola                |             | 0              |             |
| Bacteria.Firmicutes.Clostridia.Clostridiales.IncertaeSedisXI.Parvimonas               |             | 0              |             |
| Bacteria.Firmicutes.Clostridia.Clostridiales.IncertaeSedisXI.Peptoniphilus            |             | 0              |             |
| Bacteria.Firmicutes.Clostridia.Clostridiales.IncertaeSedisXI.Sporanaerobacter         |             | 0              |             |
| Bacteria.Firmicutes.Clostridia.Clostridiales.IncertaeSedisXI.Tepidimicrobium          |             | 0              |             |
| Bacteria.Firmicutes.Clostridia.Clostridiales.IncertaeSedisXI.Tissierella              |             | 0              |             |
| Bacteria.Firmicutes.Clostridia.Clostridiales.IncertaeSedisXI.unclassified_genus       |             | 0              |             |
| Bacteria.Firmicutes.Clostridia.Clostridiales.IncertaeSedisXIII                        |             | 0              |             |
| Bacteria.Firmicutes.Clostridia.Clostridiales.IncertaeSedisXIII.Anaerovorax            |             | 0              |             |
| Bacteria.Firmicutes.Clostridia.Clostridiales.IncertaeSedisXIII.unclassified_genus     |             | 0              |             |
| Bacteria.Firmicutes.Clostridia.Clostridiales.IncertaeSedisXIV                         |             | 0              |             |
| Bacteria.Firmicutes.Clostridia.Clostridiales.IncertaeSedisXIV.Blautia                 |             | 0              |             |
| Bacteria.Firmicutes.Clostridia.Clostridiales.Lachnospiraceae                          |             | 0              |             |
| Bacteria.Firmicutes.Clostridia.Clostridiales.Lachnospiraceae.Anaerospobacter          |             | 0              |             |
| Bacteria.Firmicutes.Clostridia.Clostridiales.Lachnospiraceae.Orbacterium              |             | 0              |             |
| Bacteria.Firmicutes.Clostridia.Clostridiales.Lachnospiraceae.unclassified_genus       |             | 0              |             |
| Bacteria.Firmicutes.Clostridia.Clostridiales.Peptococcaceae                           |             | 0              |             |
| Bacteria.Firmicutes.Clostridia.Clostridiales.Peptococcaceae.Peptococcus               |             | 0              |             |
| Bacteria.Firmicutes.Clostridia.Clostridiales.Peptococcaceae.unclassified_genus        |             | 0              |             |
| Bacteria.Firmicutes.Clostridia.Clostridiales.Peptostreptococcaceae                    |             | 0              |             |
| Bacteria.Firmicutes.Clostridia.Clostridiales.Peptostreptococcaceae.Peptostreptococcus |             | 0              |             |
| Bacteria.Firmicutes.Clostridia.Clostridiales.Peptostreptococcaceae.Sporacetigenium    |             | 0              |             |
| Bacteria.Firmicutes.Clostridia.Clostridiales.Peptostreptococcaceae.unclassified_genus |             | 0              |             |
| Bacteria.Firmicutes.Clostridia.Clostridiales.Ruminococcaceae                          | 3.976336082 |                |             |
| Bacteria.Firmicutes.Clostridia.Clostridiales.Ruminococcaceae.Acetivibrio              |             | 0              |             |
| Bacteria.Firmicutes.Clostridia.Clostridiales.Ruminococcaceae.Anaerofium               |             | 0              |             |
| Bacteria.Firmicutes.Clostridia.Clostridiales.Ruminococcaceae.Anaerotruncus            |             | 0              |             |
| Bacteria.Firmicutes.Clostridia.Clostridiales.Ruminococcaceae.Butyricoccus             |             | 0              |             |
| Bacteria.Firmicutes.Clostridia.Clostridiales.Ruminococcaceae.Faecalibacterium         |             | 0              |             |
| Bacteria.Firmicutes.Clostridia.Clostridiales.Ruminococcaceae.Oscillibacter            |             | 0              |             |
| Bacteria.Firmicutes.Clostridia.Clostridiales.Ruminococcaceae.Ruminococcus             |             | 0              |             |
| Bacteria.Firmicutes.Clostridia.Clostridiales.Ruminococcaceae.Subdoligranulum          |             | 0              |             |
| Bacteria.Firmicutes.Clostridia.Clostridiales.Ruminococcaceae.unclassified_genus       | 3.976336082 |                |             |
| Bacteria.Firmicutes.Clostridia.Clostridiales.unclassified_family                      |             | 0              |             |



|                                                                                                                 |             |  |  |
|-----------------------------------------------------------------------------------------------------------------|-------------|--|--|
| Bacteria.Firmicutes.Clostridia.Clostridiales.unclassified_family.unclassified_genus                             | 0           |  |  |
| Bacteria.Firmicutes.Clostridia.Clostridiales.Veillonellaceae                                                    | 4.039659764 |  |  |
| Bacteria.Firmicutes.Clostridia.Clostridiales.Veillonellaceae.Anaerococcus                                       | 0           |  |  |
| Bacteria.Firmicutes.Clostridia.Clostridiales.Veillonellaceae.Dialister                                          | 0           |  |  |
| Bacteria.Firmicutes.Clostridia.Clostridiales.Veillonellaceae.Megasphaera                                        | 0           |  |  |
| Bacteria.Firmicutes.Clostridia.Clostridiales.Veillonellaceae.Phascolarctobacterium                              | 0           |  |  |
| Bacteria.Firmicutes.Clostridia.Clostridiales.Veillonellaceae.Selenomonas                                        | 0           |  |  |
| Bacteria.Firmicutes.Clostridia.Clostridiales.Veillonellaceae.Sporomusa                                          | 0           |  |  |
| Bacteria.Firmicutes.Clostridia.Clostridiales.Veillonellaceae.Sporotalea                                         | 0           |  |  |
| Bacteria.Firmicutes.Clostridia.Clostridiales.Veillonellaceae.unclassified_genus                                 | 0           |  |  |
| Bacteria.Firmicutes.Clostridia.Clostridiales.Veillonellaceae.Veillonella                                        | 4.039659764 |  |  |
| Bacteria.Firmicutes.Clostridia.unclassified_order                                                               | 0           |  |  |
| Bacteria.Firmicutes.Clostridia.unclassified_order.unclassified_family                                           | 0           |  |  |
| Bacteria.Firmicutes.Clostridia.unclassified_order.unclassified_family.unclassified_genus                        | 0           |  |  |
| Bacteria.Firmicutes.Erysipelotrichi                                                                             | 0           |  |  |
| Bacteria.Firmicutes.Erysipelotrichi.Erysipelotrichales                                                          | 0           |  |  |
| Bacteria.Firmicutes.Erysipelotrichi.Erysipelotrichales.Erysipelotrichaceae                                      | 0           |  |  |
| Bacteria.Firmicutes.Erysipelotrichi.Erysipelotrichales.Erysipelotrichaceae.Allobaculum                          | 0           |  |  |
| Bacteria.Firmicutes.Erysipelotrichi.Erysipelotrichales.Erysipelotrichaceae.Erysipelothrix                       | 0           |  |  |
| Bacteria.Firmicutes.Erysipelotrichi.Erysipelotrichales.Erysipelotrichaceae.Turicibacter                         | 0           |  |  |
| Bacteria.Firmicutes.Erysipelotrichi.Erysipelotrichales.Erysipelotrichaceae.unclassified_genus                   | 0           |  |  |
| Bacteria.Firmicutes.unclassified_class                                                                          | 0           |  |  |
| Bacteria.Firmicutes.unclassified_class.unclassified_order                                                       | 0           |  |  |
| Bacteria.Firmicutes.unclassified_class.unclassified_order.unclassified_family                                   | 0           |  |  |
| Bacteria.Firmicutes.unclassified_class.unclassified_order.unclassified_family.unclassified_genus                | 0           |  |  |
| Bacteria.Fusobacteria                                                                                           | 0           |  |  |
| Bacteria.Fusobacteria.Fusobacteria                                                                              | 0           |  |  |
| Bacteria.Fusobacteria.Fusobacteria.Fusobacteriales                                                              | 0           |  |  |
| Bacteria.Fusobacteria.Fusobacteria.Fusobacteriales.Fusobacteriaceae                                             | 0           |  |  |
| Bacteria.Fusobacteria.Fusobacteria.Fusobacteriales.Fusobacteriaceae.Cetobacterium                               | 0           |  |  |
| Bacteria.Fusobacteria.Fusobacteria.Fusobacteriales.Fusobacteriaceae.Fusobacterium                               | 0           |  |  |
| Bacteria.Fusobacteria.Fusobacteria.Fusobacteriales.Fusobacteriaceae.unclassified_genus                          | 0           |  |  |
| Bacteria.Fusobacteria.Fusobacteria.Fusobacteriales.Leptotrichiaceae                                             | 0           |  |  |
| Bacteria.Fusobacteria.Fusobacteria.Fusobacteriales.Leptotrichiaceae.Leptotrichia                                | 0           |  |  |
| Bacteria.Fusobacteria.Fusobacteria.Fusobacteriales.Leptotrichiaceae.Sebaldella                                  | 0           |  |  |
| Bacteria.Fusobacteria.Fusobacteria.Fusobacteriales.unclassified_family                                          | 0           |  |  |
| Bacteria.Fusobacteria.Fusobacteria.Fusobacteriales.unclassified_family.unclassified_genus                       | 0           |  |  |
| Bacteria.Gemmatimonadetes                                                                                       | 0           |  |  |
| Bacteria.Gemmatimonadetes.Gemmatimonadetes                                                                      | 0           |  |  |
| Bacteria.Gemmatimonadetes.Gemmatimonadetes.Gemmatimonadales                                                     | 0           |  |  |
| Bacteria.Gemmatimonadetes.Gemmatimonadetes.Gemmatimonadales.Gemmatimonadaceae                                   | 0           |  |  |
| Bacteria.Gemmatimonadetes.Gemmatimonadetes.Gemmatimonadales.Gemmatimonadaceae.Gemmatimonas                      | 0           |  |  |
| Bacteria.Nitrospira                                                                                             | 0           |  |  |
| Bacteria.Nitrospira.Nitrospira                                                                                  | 0           |  |  |
| Bacteria.Nitrospira.Nitrospira.Nitrospirales                                                                    | 0           |  |  |
| Bacteria.Nitrospira.Nitrospira.Nitrospirales.Nitrospiraceae                                                     | 0           |  |  |
| Bacteria.Nitrospira.Nitrospira.Nitrospirales.Nitrospiraceae.Nitrospira                                          | 0           |  |  |
| Bacteria.OD1                                                                                                    | 0           |  |  |
| Bacteria.OD1.OD1_genera_incertae_sedis                                                                          | 0           |  |  |
| Bacteria.OD1.OD1_genera_incertae_sedis.unclassified_order                                                       | 0           |  |  |
| Bacteria.OD1.OD1_genera_incertae_sedis.unclassified_order.unclassified_family                                   | 0           |  |  |
| Bacteria.OD1.OD1_genera_incertae_sedis.unclassified_order.unclassified_family.unclassified_genus                | 0           |  |  |
| Bacteria.Planctomycetes                                                                                         | 0           |  |  |
| Bacteria.Planctomycetes.Planctomycetacia                                                                        | 0           |  |  |
| Bacteria.Planctomycetes.Planctomycetacia.Planctomycetales                                                       | 0           |  |  |
| Bacteria.Planctomycetes.Planctomycetacia.Planctomycetales.Planctomycetaceae                                     | 0           |  |  |
| Bacteria.Planctomycetes.Planctomycetacia.Planctomycetales.Planctomycetaceae.Gemmata                             | 0           |  |  |
| Bacteria.Planctomycetes.Planctomycetacia.Planctomycetales.Planctomycetaceae.Planctomyces                        | 0           |  |  |
| Bacteria.Planctomycetes.Planctomycetacia.Planctomycetales.Planctomycetaceae.Rhodopirellula                      | 0           |  |  |
| Bacteria.Planctomycetes.Planctomycetacia.Planctomycetales.Planctomycetaceae.Singulispheera                      | 0           |  |  |
| Bacteria.Planctomycetes.Planctomycetacia.Planctomycetales.Planctomycetaceae.unclassified_genus                  | 0           |  |  |
| Bacteria.Proteobacteria                                                                                         | 5.654016643 |  |  |
| Bacteria.Proteobacteria.Alphaproteobacteria                                                                     | 5.385213779 |  |  |
| Bacteria.Proteobacteria.Alphaproteobacteria.Alphaproteobacteria_incertae_sedis                                  | 0           |  |  |
| Bacteria.Proteobacteria.Alphaproteobacteria.Alphaproteobacteria_incertae_sedis.Novispirillum                    | 0           |  |  |
| Bacteria.Proteobacteria.Alphaproteobacteria.Alphaproteobacteria_incertae_sedis.Novispirillum.unclassified_genus | 0           |  |  |
| Bacteria.Proteobacteria.Alphaproteobacteria.Caulobacterales                                                     | 0           |  |  |
| Bacteria.Proteobacteria.Alphaproteobacteria.Caulobacterales.Caulobacteraceae                                    | 0           |  |  |
| Bacteria.Proteobacteria.Alphaproteobacteria.Caulobacterales.Caulobacteraceae.Asticcacaulis                      | 0           |  |  |
| Bacteria.Proteobacteria.Alphaproteobacteria.Caulobacterales.Caulobacteraceae.Brevundimonas                      | 0           |  |  |
| Bacteria.Proteobacteria.Alphaproteobacteria.Caulobacterales.Caulobacteraceae.Caulobacter                        | 0           |  |  |
| Bacteria.Proteobacteria.Alphaproteobacteria.Caulobacterales.Caulobacteraceae.Phenylobacterium                   | 0           |  |  |
| Bacteria.Proteobacteria.Alphaproteobacteria.Caulobacterales.Caulobacteraceae.unclassified_genus                 | 0           |  |  |
| Bacteria.Proteobacteria.Alphaproteobacteria.Rhizobiales                                                         | 4.1964081   |  |  |
| Bacteria.Proteobacteria.Alphaproteobacteria.Rhizobiales.Bradyrhizobiaceae                                       | 4.1964081   |  |  |
| Bacteria.Proteobacteria.Alphaproteobacteria.Rhizobiales.Bradyrhizobiaceae.Agromonas                             | 0           |  |  |
| Bacteria.Proteobacteria.Alphaproteobacteria.Rhizobiales.Bradyrhizobiaceae.Bosea                                 | 0           |  |  |
| Bacteria.Proteobacteria.Alphaproteobacteria.Rhizobiales.Bradyrhizobiaceae.unclassified_genus                    | 4.1964081   |  |  |
| Bacteria.Proteobacteria.Alphaproteobacteria.Rhizobiales.Brucellaceae                                            | 0           |  |  |
| Bacteria.Proteobacteria.Alphaproteobacteria.Rhizobiales.Brucellaceae.Ochrobactrum                               | 0           |  |  |
| Bacteria.Proteobacteria.Alphaproteobacteria.Rhizobiales.Hyphomicrobiaceae                                       | 0           |  |  |
| Bacteria.Proteobacteria.Alphaproteobacteria.Rhizobiales.Hyphomicrobiaceae.Devosia                               | 0           |  |  |
| Bacteria.Proteobacteria.Alphaproteobacteria.Rhizobiales.Hyphomicrobiaceae.unclassified_genus                    | 0           |  |  |
| Bacteria.Proteobacteria.Alphaproteobacteria.Rhizobiales.Methylobacteriaceae                                     | 0           |  |  |
| Bacteria.Proteobacteria.Alphaproteobacteria.Rhizobiales.Methylobacteriaceae.Methylobacterium                    | 0           |  |  |
| Bacteria.Proteobacteria.Alphaproteobacteria.Rhizobiales.Methylocystaceae                                        | 0           |  |  |
| Bacteria.Proteobacteria.Alphaproteobacteria.Rhizobiales.Methylocystaceae.Methylocystis                          | 0           |  |  |
| Bacteria.Proteobacteria.Alphaproteobacteria.Rhizobiales.Rhizobiaceae                                            | 0           |  |  |
| Bacteria.Proteobacteria.Alphaproteobacteria.Rhizobiales.Rhizobiaceae.Rhizobium                                  | 0           |  |  |
| Bacteria.Proteobacteria.Alphaproteobacteria.Rhizobiales.Rhizobiaceae.Sinorhizobium                              | 0           |  |  |
| Bacteria.Proteobacteria.Alphaproteobacteria.Rhizobiales.unclassified_family                                     | 0           |  |  |
| Bacteria.Proteobacteria.Alphaproteobacteria.Rhizobiales.unclassified_family.unclassified_genus                  | 0           |  |  |
| Bacteria.Proteobacteria.Alphaproteobacteria.Rhizobiales.Xanthobacteraceae                                       | 0           |  |  |
| Bacteria.Proteobacteria.Alphaproteobacteria.Rhizobiales.Xanthobacteraceae.Azorhizobium                          | 0           |  |  |
| Bacteria.Proteobacteria.Alphaproteobacteria.Rhodobacteriales                                                    | 0           |  |  |
| Bacteria.Proteobacteria.Alphaproteobacteria.Rhodobacteriales.Rhodobacteraceae                                   | 0           |  |  |
| Bacteria.Proteobacteria.Alphaproteobacteria.Rhodobacteriales.Rhodobacteraceae.Haematobacter                     | 0           |  |  |
| Bacteria.Proteobacteria.Alphaproteobacteria.Rhodobacteriales.Rhodobacteraceae.Pannonibacter                     | 0           |  |  |
| Bacteria.Proteobacteria.Alphaproteobacteria.Rhodobacteriales.Rhodobacteraceae.Paracoccus                        | 0           |  |  |
| Bacteria.Proteobacteria.Alphaproteobacteria.Rhodobacteriales.Rhodobacteraceae.Rhodobacter                       | 0           |  |  |
| Bacteria.Proteobacteria.Alphaproteobacteria.Rhodobacteriales.Rhodobacteraceae.Rubellimicrobium                  | 0           |  |  |
| Bacteria.Proteobacteria.Alphaproteobacteria.Rhodobacteriales.Rhodobacteraceae.unclassified_genus                | 0           |  |  |
| Bacteria.Proteobacteria.Alphaproteobacteria.Rhodospirillales                                                    | 0           |  |  |

|                                                                                                              |             |  |  |
|--------------------------------------------------------------------------------------------------------------|-------------|--|--|
| Bacteria.Proteobacteria.Alphaproteobacteria.Rhodospirillales.Acetobacteraceae                                | 0           |  |  |
| Bacteria.Proteobacteria.Alphaproteobacteria.Rhodospirillales.Acetobacteraceae.Acetobacter                    | 0           |  |  |
| Bacteria.Proteobacteria.Alphaproteobacteria.Rhodospirillales.Acetobacteraceae.Belnapia                       | 0           |  |  |
| Bacteria.Proteobacteria.Alphaproteobacteria.Rhodospirillales.Acetobacteraceae.Gluconacetobacter              | 0           |  |  |
| Bacteria.Proteobacteria.Alphaproteobacteria.Rhodospirillales.Acetobacteraceae.Gluconobacter                  | 0           |  |  |
| Bacteria.Proteobacteria.Alphaproteobacteria.Rhodospirillales.Acetobacteraceae.Roseococcus                    | 0           |  |  |
| Bacteria.Proteobacteria.Alphaproteobacteria.Rhodospirillales.Acetobacteraceae.Roseomonas                     | 0           |  |  |
| Bacteria.Proteobacteria.Alphaproteobacteria.Rhodospirillales.Acetobacteraceae.unclassified_genus             | 0           |  |  |
| Bacteria.Proteobacteria.Alphaproteobacteria.Rhodospirillales.Rhodospirillaceae                               | 0           |  |  |
| Bacteria.Proteobacteria.Alphaproteobacteria.Rhodospirillales.Rhodospirillaceae.Azospirillum                  | 0           |  |  |
| Bacteria.Proteobacteria.Alphaproteobacteria.Rhodospirillales.Rhodospirillaceae.Skermanella                   | 0           |  |  |
| Bacteria.Proteobacteria.Alphaproteobacteria.Rhodospirillales.Rhodospirillaceae.Telmatospirillum              | 0           |  |  |
| Bacteria.Proteobacteria.Alphaproteobacteria.Rhodospirillales.Rhodospirillaceae.unclassified_genus            | 0           |  |  |
| Bacteria.Proteobacteria.Alphaproteobacteria.Sphingomonadales                                                 | 5.356144642 |  |  |
| Bacteria.Proteobacteria.Alphaproteobacteria.Sphingomonadales.Erythrobacteraceae                              | 0           |  |  |
| Bacteria.Proteobacteria.Alphaproteobacteria.Sphingomonadales.Erythrobacteraceae.Porphryobacter               | 0           |  |  |
| Bacteria.Proteobacteria.Alphaproteobacteria.Sphingomonadales.Sphingomonadaceae                               | 5.356144642 |  |  |
| Bacteria.Proteobacteria.Alphaproteobacteria.Sphingomonadales.Sphingomonadaceae.Blastomonas                   | 0           |  |  |
| Bacteria.Proteobacteria.Alphaproteobacteria.Sphingomonadales.Sphingomonadaceae.Novosphingobium               | 0           |  |  |
| Bacteria.Proteobacteria.Alphaproteobacteria.Sphingomonadales.Sphingomonadaceae.Sphingobium                   | 0           |  |  |
| Bacteria.Proteobacteria.Alphaproteobacteria.Sphingomonadales.Sphingomonadaceae.Sphingomonas                  | 5.312337269 |  |  |
| Bacteria.Proteobacteria.Alphaproteobacteria.Sphingomonadales.Sphingomonadaceae.unclassified_genus            | 4.338187957 |  |  |
| Bacteria.Proteobacteria.Alphaproteobacteria.Sphingomonadales.unclassified_family                             | 0           |  |  |
| Bacteria.Proteobacteria.Alphaproteobacteria.Sphingomonadales.unclassified_family.unclassified_genus          | 0           |  |  |
| Bacteria.Proteobacteria.Alphaproteobacteria.unclassified_order                                               | 0           |  |  |
| Bacteria.Proteobacteria.Alphaproteobacteria.unclassified_order.unclassified_family                           | 0           |  |  |
| Bacteria.Proteobacteria.Alphaproteobacteria.unclassified_order.unclassified_family.unclassified_genus        | 0           |  |  |
| Bacteria.Proteobacteria.Betaproteobacteria                                                                   | 4.310337686 |  |  |
| Bacteria.Proteobacteria.Betaproteobacteria.Burkholderiales                                                   | 4.283578455 |  |  |
| Bacteria.Proteobacteria.Betaproteobacteria.Burkholderiales.Alcaligenaceae                                    | 0           |  |  |
| Bacteria.Proteobacteria.Betaproteobacteria.Burkholderiales.Alcaligenaceae.Achromobacter                      | 0           |  |  |
| Bacteria.Proteobacteria.Betaproteobacteria.Burkholderiales.Alcaligenaceae.Alcaligenes                        | 0           |  |  |
| Bacteria.Proteobacteria.Betaproteobacteria.Burkholderiales.Alcaligenaceae.Sutterella                         | 0           |  |  |
| Bacteria.Proteobacteria.Betaproteobacteria.Burkholderiales.Alcaligenaceae.unclassified_genus                 | 0           |  |  |
| Bacteria.Proteobacteria.Betaproteobacteria.Burkholderiales.Burkholderiaceae                                  | 3.373659633 |  |  |
| Bacteria.Proteobacteria.Betaproteobacteria.Burkholderiales.Burkholderiaceae.Burkholderia                     | 3.373659633 |  |  |
| Bacteria.Proteobacteria.Betaproteobacteria.Burkholderiales.Burkholderiaceae.Chilimimonas                     | 0           |  |  |
| Bacteria.Proteobacteria.Betaproteobacteria.Burkholderiales.Burkholderiaceae.Cupriavidus                      | 0           |  |  |
| Bacteria.Proteobacteria.Betaproteobacteria.Burkholderiales.Burkholderiaceae.Pandoraea                        | 0           |  |  |
| Bacteria.Proteobacteria.Betaproteobacteria.Burkholderiales.Burkholderiaceae.Polynucleobacter                 | 0           |  |  |
| Bacteria.Proteobacteria.Betaproteobacteria.Burkholderiales.Burkholderiaceae.Ralstonia                        | 0           |  |  |
| Bacteria.Proteobacteria.Betaproteobacteria.Burkholderiales.Burkholderiaceae.unclassified_genus               | 0           |  |  |
| Bacteria.Proteobacteria.Betaproteobacteria.Burkholderiales.Burkholderiales_incertae_sedis                    | 3.077274542 |  |  |
| Bacteria.Proteobacteria.Betaproteobacteria.Burkholderiales.Burkholderiales_incertae_sedis.Aquabacterium      | 3.077274542 |  |  |
| Bacteria.Proteobacteria.Betaproteobacteria.Burkholderiales.Burkholderiales_incertae_sedis.Ideonella          | 0           |  |  |
| Bacteria.Proteobacteria.Betaproteobacteria.Burkholderiales.Burkholderiales_incertae_sedis.Leptothrix         | 0           |  |  |
| Bacteria.Proteobacteria.Betaproteobacteria.Burkholderiales.Burkholderiales_incertae_sedis.Tepidimonas        | 0           |  |  |
| Bacteria.Proteobacteria.Betaproteobacteria.Burkholderiales.Burkholderiales_incertae_sedis.unclassified_genus | 0           |  |  |
| Bacteria.Proteobacteria.Betaproteobacteria.Burkholderiales.Comamonadaceae                                    | 4.194610088 |  |  |
| Bacteria.Proteobacteria.Betaproteobacteria.Burkholderiales.Comamonadaceae.Acidovorax                         | 4.123089305 |  |  |
| Bacteria.Proteobacteria.Betaproteobacteria.Burkholderiales.Comamonadaceae.Alicyclophilus                     | 0           |  |  |
| Bacteria.Proteobacteria.Betaproteobacteria.Burkholderiales.Comamonadaceae.Comamonas                          | 0           |  |  |
| Bacteria.Proteobacteria.Betaproteobacteria.Burkholderiales.Comamonadaceae.Curvibacter                        | 0           |  |  |
| Bacteria.Proteobacteria.Betaproteobacteria.Burkholderiales.Comamonadaceae.Delftia                            | 0           |  |  |
| Bacteria.Proteobacteria.Betaproteobacteria.Burkholderiales.Comamonadaceae.Diaphorobacter                     | 3.37598295  |  |  |
| Bacteria.Proteobacteria.Betaproteobacteria.Burkholderiales.Comamonadaceae.Hydrogenophaga                     | 0           |  |  |
| Bacteria.Proteobacteria.Betaproteobacteria.Burkholderiales.Comamonadaceae.Pelomonas                          | 0           |  |  |
| Bacteria.Proteobacteria.Betaproteobacteria.Burkholderiales.Comamonadaceae.Polaromonas                        | 0           |  |  |
| Bacteria.Proteobacteria.Betaproteobacteria.Burkholderiales.Comamonadaceae.Rhodoferrax                        | 0           |  |  |
| Bacteria.Proteobacteria.Betaproteobacteria.Burkholderiales.Comamonadaceae.unclassified_genus                 | 0           |  |  |
| Bacteria.Proteobacteria.Betaproteobacteria.Burkholderiales.Comamonadaceae.Variovorax                         | 0           |  |  |
| Bacteria.Proteobacteria.Betaproteobacteria.Burkholderiales.Oxalobacteraceae                                  | 0           |  |  |
| Bacteria.Proteobacteria.Betaproteobacteria.Burkholderiales.Oxalobacteraceae.Duganella                        | 0           |  |  |
| Bacteria.Proteobacteria.Betaproteobacteria.Burkholderiales.Oxalobacteraceae.Herbaspirillum                   | 0           |  |  |
| Bacteria.Proteobacteria.Betaproteobacteria.Burkholderiales.Oxalobacteraceae.Janthinobacterium                | 0           |  |  |
| Bacteria.Proteobacteria.Betaproteobacteria.Burkholderiales.Oxalobacteraceae.Massilia                         | 0           |  |  |
| Bacteria.Proteobacteria.Betaproteobacteria.Burkholderiales.Oxalobacteraceae.Oxalobacter                      | 0           |  |  |
| Bacteria.Proteobacteria.Betaproteobacteria.Burkholderiales.Oxalobacteraceae.unclassified_genus               | 0           |  |  |
| Bacteria.Proteobacteria.Betaproteobacteria.Burkholderiales.unclassified_family                               | 0           |  |  |
| Bacteria.Proteobacteria.Betaproteobacteria.Burkholderiales.unclassified_family.unclassified_genus            | 0           |  |  |
| Bacteria.Proteobacteria.Betaproteobacteria.Hydrogenophiales                                                  | 0           |  |  |
| Bacteria.Proteobacteria.Betaproteobacteria.Hydrogenophiales.Hydrogenophilaceae                               | 0           |  |  |
| Bacteria.Proteobacteria.Betaproteobacteria.Hydrogenophiales.Hydrogenophilaceae.Hydrogenophilus               | 0           |  |  |
| Bacteria.Proteobacteria.Betaproteobacteria.Hydrogenophiales.Hydrogenophilaceae.Petrobacter                   | 0           |  |  |
| Bacteria.Proteobacteria.Betaproteobacteria.Methylophilales                                                   | 0           |  |  |
| Bacteria.Proteobacteria.Betaproteobacteria.Methylophilales.Methylophilaceae                                  | 0           |  |  |
| Bacteria.Proteobacteria.Betaproteobacteria.Methylophilales.Methylophilaceae.Methylobacillus                  | 0           |  |  |
| Bacteria.Proteobacteria.Betaproteobacteria.Methylophilales.Methylophilaceae.Methylophilus                    | 0           |  |  |
| Bacteria.Proteobacteria.Betaproteobacteria.Methylophilales.Methylophilaceae.unclassified_genus               | 0           |  |  |
| Bacteria.Proteobacteria.Betaproteobacteria.Neisseriales                                                      | 3.735216387 |  |  |
| Bacteria.Proteobacteria.Betaproteobacteria.Neisseriales.Neisseriaceae                                        | 3.735216387 |  |  |
| Bacteria.Proteobacteria.Betaproteobacteria.Neisseriales.Neisseriaceae.Aquitalea                              | 0           |  |  |
| Bacteria.Proteobacteria.Betaproteobacteria.Neisseriales.Neisseriaceae.Kingella                               | 0           |  |  |
| Bacteria.Proteobacteria.Betaproteobacteria.Neisseriales.Neisseriaceae.Microvirgula                           | 3.735216387 |  |  |
| Bacteria.Proteobacteria.Betaproteobacteria.Neisseriales.Neisseriaceae.Neisseria                              | 0           |  |  |
| Bacteria.Proteobacteria.Betaproteobacteria.Neisseriales.Neisseriaceae.unclassified_genus                     | 0           |  |  |
| Bacteria.Proteobacteria.Betaproteobacteria.Neisseriales.Neisseriaceae.Uruburuella                            | 0           |  |  |
| Bacteria.Proteobacteria.Betaproteobacteria.Neisseriales.Neisseriaceae.Vitreoscilla                           | 0           |  |  |
| Bacteria.Proteobacteria.Betaproteobacteria.Neisseriales.Neisseriaceae.Vogesella                              | 0           |  |  |
| Bacteria.Proteobacteria.Betaproteobacteria.Nitrosomonadales                                                  | 0           |  |  |
| Bacteria.Proteobacteria.Betaproteobacteria.Nitrosomonadales.Nitrosomonadaceae                                | 0           |  |  |
| Bacteria.Proteobacteria.Betaproteobacteria.Nitrosomonadales.Nitrosomonadaceae.Nitrosospora                   | 0           |  |  |
| Bacteria.Proteobacteria.Betaproteobacteria.Nitrosomonadales.Nitrosomonadaceae.unclassified_genus             | 0           |  |  |
| Bacteria.Proteobacteria.Betaproteobacteria.Rhodocyclales                                                     | 0           |  |  |
| Bacteria.Proteobacteria.Betaproteobacteria.Rhodocyclales.Rhodocyclaceae                                      | 0           |  |  |
| Bacteria.Proteobacteria.Betaproteobacteria.Rhodocyclales.Rhodocyclaceae.Azonexus                             | 0           |  |  |
| Bacteria.Proteobacteria.Betaproteobacteria.Rhodocyclales.Rhodocyclaceae.Azospira                             | 0           |  |  |
| Bacteria.Proteobacteria.Betaproteobacteria.Rhodocyclales.Rhodocyclaceae.Dechloromonas                        | 0           |  |  |
| Bacteria.Proteobacteria.Betaproteobacteria.Rhodocyclales.Rhodocyclaceae.Methyloversatilis                    | 0           |  |  |
| Bacteria.Proteobacteria.Betaproteobacteria.Rhodocyclales.Rhodocyclaceae.Propionivibrio                       | 0           |  |  |
| Bacteria.Proteobacteria.Betaproteobacteria.Rhodocyclales.Rhodocyclaceae.Shinella                             | 0           |  |  |
| Bacteria.Proteobacteria.Betaproteobacteria.Rhodocyclales.Rhodocyclaceae.Thaueria                             | 0           |  |  |
| Bacteria.Proteobacteria.Betaproteobacteria.Rhodocyclales.Rhodocyclaceae.unclassified_genus                   | 0           |  |  |

|                                                                                                             |  |             |  |
|-------------------------------------------------------------------------------------------------------------|--|-------------|--|
| Bacteria.Proteobacteria.Betaproteobacteria.Rhodocyclales.Rhodocyclaceae.Zoogloea                            |  | 0           |  |
| Bacteria.Proteobacteria.Betaproteobacteria.unclassified_order                                               |  | 0           |  |
| Bacteria.Proteobacteria.Betaproteobacteria.unclassified_order.unclassified_family                           |  | 0           |  |
| Bacteria.Proteobacteria.Betaproteobacteria.unclassified_order.unclassified_family.unclassified_genus        |  | 0           |  |
| Bacteria.Proteobacteria.Deltaproteobacteria                                                                 |  | 0           |  |
| Bacteria.Proteobacteria.Deltaproteobacteria.Bdellovibrionales                                               |  | 0           |  |
| Bacteria.Proteobacteria.Deltaproteobacteria.Bdellovibrionales.Bacteriovoraceae                              |  | 0           |  |
| Bacteria.Proteobacteria.Deltaproteobacteria.Bdellovibrionales.Bacteriovoraceae.Bacteriovorax                |  | 0           |  |
| Bacteria.Proteobacteria.Deltaproteobacteria.Bdellovibrionales.Bacteriovoraceae.Peredibacter                 |  | 0           |  |
| Bacteria.Proteobacteria.Deltaproteobacteria.Bdellovibrionales.Bdellovibrionaceae                            |  | 0           |  |
| Bacteria.Proteobacteria.Deltaproteobacteria.Bdellovibrionales.Bdellovibrionaceae.Bdellovibrio               |  | 0           |  |
| Bacteria.Proteobacteria.Deltaproteobacteria.Desulfovibrionales                                              |  | 0           |  |
| Bacteria.Proteobacteria.Deltaproteobacteria.Desulfovibrionales.Desulfovibrionaceae                          |  | 0           |  |
| Bacteria.Proteobacteria.Deltaproteobacteria.Desulfovibrionales.Desulfovibrionaceae.Desulfovibrio            |  | 0           |  |
| Bacteria.Proteobacteria.Deltaproteobacteria.Desulfuromonadales                                              |  | 0           |  |
| Bacteria.Proteobacteria.Deltaproteobacteria.Desulfuromonadales.Geobacteraceae                               |  | 0           |  |
| Bacteria.Proteobacteria.Deltaproteobacteria.Desulfuromonadales.Geobacteraceae.Geobacter                     |  | 0           |  |
| Bacteria.Proteobacteria.Deltaproteobacteria.Myxococcales                                                    |  | 0           |  |
| Bacteria.Proteobacteria.Deltaproteobacteria.Myxococcales.Cystobacteraceae                                   |  | 0           |  |
| Bacteria.Proteobacteria.Deltaproteobacteria.Myxococcales.Cystobacteraceae.Cystobacter                       |  | 0           |  |
| Bacteria.Proteobacteria.Deltaproteobacteria.Myxococcales.Cystobacteraceae.unclassified_genus                |  | 0           |  |
| Bacteria.Proteobacteria.Deltaproteobacteria.Myxococcales.Nannocystaceae                                     |  | 0           |  |
| Bacteria.Proteobacteria.Deltaproteobacteria.Myxococcales.Nannocystaceae.Nannocystis                         |  | 0           |  |
| Bacteria.Proteobacteria.Deltaproteobacteria.Myxococcales.Polyangiaceae                                      |  | 0           |  |
| Bacteria.Proteobacteria.Deltaproteobacteria.Myxococcales.Polyangiaceae.Byssovorax                           |  | 0           |  |
| Bacteria.Proteobacteria.Deltaproteobacteria.Myxococcales.Polyangiaceae.unclassified_genus                   |  | 0           |  |
| Bacteria.Proteobacteria.Deltaproteobacteria.Myxococcales.unclassified_family                                |  | 0           |  |
| Bacteria.Proteobacteria.Deltaproteobacteria.Myxococcales.unclassified_family.unclassified_genus             |  | 0           |  |
| Bacteria.Proteobacteria.Deltaproteobacteria.unclassified_order                                              |  | 0           |  |
| Bacteria.Proteobacteria.Deltaproteobacteria.unclassified_order.unclassified_family                          |  | 0           |  |
| Bacteria.Proteobacteria.Deltaproteobacteria.unclassified_order.unclassified_family.unclassified_genus       |  | 0           |  |
| Bacteria.Proteobacteria.Epsilonproteobacteria                                                               |  | 4.039659764 |  |
| Bacteria.Proteobacteria.Epsilonproteobacteria.Campylobacteriales                                            |  | 4.039659764 |  |
| Bacteria.Proteobacteria.Epsilonproteobacteria.Campylobacteriales.Campylobacteraceae                         |  | 4.039659764 |  |
| Bacteria.Proteobacteria.Epsilonproteobacteria.Campylobacteriales.Campylobacteraceae.Arcobacter              |  | 4.039659764 |  |
| Bacteria.Proteobacteria.Epsilonproteobacteria.Campylobacteriales.Campylobacteraceae.Campylobacter           |  | 0           |  |
| Bacteria.Proteobacteria.Epsilonproteobacteria.Campylobacteriales.Campylobacteraceae.Sulfurospirillum        |  | 0           |  |
| Bacteria.Proteobacteria.Epsilonproteobacteria.Campylobacteriales.Helicobacteraceae                          |  | 0           |  |
| Bacteria.Proteobacteria.Epsilonproteobacteria.Campylobacteriales.Helicobacteraceae.Helicobacter             |  | 0           |  |
| Bacteria.Proteobacteria.Epsilonproteobacteria.unclassified_order                                            |  | 0           |  |
| Bacteria.Proteobacteria.Epsilonproteobacteria.unclassified_order.unclassified_family                        |  | 0           |  |
| Bacteria.Proteobacteria.Epsilonproteobacteria.unclassified_order.unclassified_family.unclassified_genus     |  | 0           |  |
| Bacteria.Proteobacteria.Gammaproteobacteria                                                                 |  | 5.253283968 |  |
| Bacteria.Proteobacteria.Gammaproteobacteria.Aeromonadales                                                   |  | 0           |  |
| Bacteria.Proteobacteria.Gammaproteobacteria.Aeromonadales.Aeromonadaceae                                    |  | 0           |  |
| Bacteria.Proteobacteria.Gammaproteobacteria.Aeromonadales.Aeromonadaceae.Aeromonas                          |  | 0           |  |
| Bacteria.Proteobacteria.Gammaproteobacteria.Aeromonadales.Aeromonadaceae.unclassified_genus                 |  | 0           |  |
| Bacteria.Proteobacteria.Gammaproteobacteria.Alteromonadales                                                 |  | 0           |  |
| Bacteria.Proteobacteria.Gammaproteobacteria.Alteromonadales.Shewanellaceae                                  |  | 0           |  |
| Bacteria.Proteobacteria.Gammaproteobacteria.Alteromonadales.Shewanellaceae.Shewanella                       |  | 0           |  |
| Bacteria.Proteobacteria.Gammaproteobacteria.Alteromonadales.unclassified_family                             |  | 0           |  |
| Bacteria.Proteobacteria.Gammaproteobacteria.Alteromonadales.unclassified_family.unclassified_genus          |  | 0           |  |
| Bacteria.Proteobacteria.Gammaproteobacteria.Chromatiales                                                    |  | 0           |  |
| Bacteria.Proteobacteria.Gammaproteobacteria.Chromatiales.Chromatiaceae                                      |  | 0           |  |
| Bacteria.Proteobacteria.Gammaproteobacteria.Chromatiales.Chromatiaceae.Rheinheimera                         |  | 0           |  |
| Bacteria.Proteobacteria.Gammaproteobacteria.Enterobacteriales                                               |  | 4.906059124 |  |
| Bacteria.Proteobacteria.Gammaproteobacteria.Enterobacteriales.Enterobacteriaceae                            |  | 4.906059124 |  |
| Bacteria.Proteobacteria.Gammaproteobacteria.Enterobacteriales.Enterobacteriaceae.Buttiauxella               |  | 0           |  |
| Bacteria.Proteobacteria.Gammaproteobacteria.Enterobacteriales.Enterobacteriaceae.Cedecea                    |  | 0           |  |
| Bacteria.Proteobacteria.Gammaproteobacteria.Enterobacteriales.Enterobacteriaceae.Citrobacter                |  | 4.675105904 |  |
| Bacteria.Proteobacteria.Gammaproteobacteria.Enterobacteriales.Enterobacteriaceae.Cronobacter                |  | 0           |  |
| Bacteria.Proteobacteria.Gammaproteobacteria.Enterobacteriales.Enterobacteriaceae.Enterobacter               |  | 0           |  |
| Bacteria.Proteobacteria.Gammaproteobacteria.Enterobacteriales.Enterobacteriaceae.Erwinia                    |  | 3.800244823 |  |
| Bacteria.Proteobacteria.Gammaproteobacteria.Enterobacteriales.Enterobacteriaceae.Escherichia_Shigella       |  | 3.272458743 |  |
| Bacteria.Proteobacteria.Gammaproteobacteria.Enterobacteriales.Enterobacteriaceae.Klebsiella                 |  | 3.735634029 |  |
| Bacteria.Proteobacteria.Gammaproteobacteria.Enterobacteriales.Enterobacteriaceae.Kluyvera                   |  | 0           |  |
| Bacteria.Proteobacteria.Gammaproteobacteria.Enterobacteriales.Enterobacteriaceae.Morganella                 |  | 0           |  |
| Bacteria.Proteobacteria.Gammaproteobacteria.Enterobacteriales.Enterobacteriaceae.Pantoea                    |  | 3.946372858 |  |
| Bacteria.Proteobacteria.Gammaproteobacteria.Enterobacteriales.Enterobacteriaceae.Raoultella                 |  | 0           |  |
| Bacteria.Proteobacteria.Gammaproteobacteria.Enterobacteriales.Enterobacteriaceae.Serratia                   |  | 3.388218353 |  |
| Bacteria.Proteobacteria.Gammaproteobacteria.Enterobacteriales.Enterobacteriaceae.Trabulsilla                |  | 0           |  |
| Bacteria.Proteobacteria.Gammaproteobacteria.Enterobacteriales.Enterobacteriaceae.unclassified_genus         |  | 4.105452614 |  |
| Bacteria.Proteobacteria.Gammaproteobacteria.Enterobacteriales.Enterobacteriaceae.Yersinia                   |  | 0           |  |
| Bacteria.Proteobacteria.Gammaproteobacteria.Gammaproteobacteria_incertae_sedis                              |  | 0           |  |
| Bacteria.Proteobacteria.Gammaproteobacteria.Gammaproteobacteria_incertae_sedis.Solimonas                    |  | 0           |  |
| Bacteria.Proteobacteria.Gammaproteobacteria.Gammaproteobacteria_incertae_sedis.Solimonas.unclassified_genus |  | 0           |  |
| Bacteria.Proteobacteria.Gammaproteobacteria.Legionellales                                                   |  | 0           |  |
| Bacteria.Proteobacteria.Gammaproteobacteria.Legionellales.Coxiellaceae                                      |  | 0           |  |
| Bacteria.Proteobacteria.Gammaproteobacteria.Legionellales.Coxiellaceae.Aquicella                            |  | 0           |  |
| Bacteria.Proteobacteria.Gammaproteobacteria.Legionellales.Legionellaceae                                    |  | 0           |  |
| Bacteria.Proteobacteria.Gammaproteobacteria.Legionellales.Legionellaceae.Legionella                         |  | 0           |  |
| Bacteria.Proteobacteria.Gammaproteobacteria.Legionellales.Legionellaceae.unclassified_genus                 |  | 0           |  |
| Bacteria.Proteobacteria.Gammaproteobacteria.Oceanospirillales                                               |  | 0           |  |
| Bacteria.Proteobacteria.Gammaproteobacteria.Oceanospirillales.Halomonadaceae                                |  | 0           |  |
| Bacteria.Proteobacteria.Gammaproteobacteria.Oceanospirillales.Halomonadaceae.Halomonas                      |  | 0           |  |
| Bacteria.Proteobacteria.Gammaproteobacteria.Pasteurellales                                                  |  | 0           |  |
| Bacteria.Proteobacteria.Gammaproteobacteria.Pasteurellales.Pasteurellaceae                                  |  | 0           |  |
| Bacteria.Proteobacteria.Gammaproteobacteria.Pasteurellales.Pasteurellaceae.Actinobacillus                   |  | 0           |  |
| Bacteria.Proteobacteria.Gammaproteobacteria.Pasteurellales.Pasteurellaceae.Aggregatibacter                  |  | 0           |  |
| Bacteria.Proteobacteria.Gammaproteobacteria.Pasteurellales.Pasteurellaceae.Haemophilus                      |  | 0           |  |
| Bacteria.Proteobacteria.Gammaproteobacteria.Pasteurellales.Pasteurellaceae.Pasteurella                      |  | 0           |  |
| Bacteria.Proteobacteria.Gammaproteobacteria.Pasteurellales.Pasteurellaceae.unclassified_genus               |  | 0           |  |
| Bacteria.Proteobacteria.Gammaproteobacteria.Pseudomonadales                                                 |  | 4.994004168 |  |
| Bacteria.Proteobacteria.Gammaproteobacteria.Pseudomonadales.Moraxellaceae                                   |  | 4.932445876 |  |
| Bacteria.Proteobacteria.Gammaproteobacteria.Pseudomonadales.Moraxellaceae.Acinetobacter                     |  | 4.828708568 |  |
| Bacteria.Proteobacteria.Gammaproteobacteria.Pseudomonadales.Moraxellaceae.Alkanindiges                      |  | 0           |  |
| Bacteria.Proteobacteria.Gammaproteobacteria.Pseudomonadales.Moraxellaceae.Enhydrobacter                     |  | 4.039659764 |  |
| Bacteria.Proteobacteria.Gammaproteobacteria.Pseudomonadales.Moraxellaceae.Moraxella                         |  | 0           |  |
| Bacteria.Proteobacteria.Gammaproteobacteria.Pseudomonadales.Moraxellaceae.Perlicudioba                      |  | 0           |  |
| Bacteria.Proteobacteria.Gammaproteobacteria.Pseudomonadales.Moraxellaceae.Psychrobacter                     |  | 0           |  |
| Bacteria.Proteobacteria.Gammaproteobacteria.Pseudomonadales.Moraxellaceae.unclassified_genus                |  | 3.925119696 |  |
| Bacteria.Proteobacteria.Gammaproteobacteria.Pseudomonadales.Pseudomonadaceae                                |  | 4.352398446 |  |
| Bacteria.Proteobacteria.Gammaproteobacteria.Pseudomonadales.Pseudomonadaceae.Azorhizophilus                 |  | 0           |  |

|                                                                                                                     |             |  |  |
|---------------------------------------------------------------------------------------------------------------------|-------------|--|--|
| Bacteria.Proteobacteria.Gammaproteobacteria.Pseudomonadales.Pseudomonadaceae.CeIlvibrio                             | 0           |  |  |
| Bacteria.Proteobacteria.Gammaproteobacteria.Pseudomonadales.Pseudomonadaceae.Pseudomonas                            | 4.327329572 |  |  |
| Bacteria.Proteobacteria.Gammaproteobacteria.Pseudomonadales.Pseudomonadaceae.unclassified_genus                     | 3.101274818 |  |  |
| Bacteria.Proteobacteria.Gammaproteobacteria.Pseudomonadales.unclassified_family                                     | 0           |  |  |
| Bacteria.Proteobacteria.Gammaproteobacteria.Pseudomonadales.unclassified_family.unclassified_genus                  | 0           |  |  |
| Bacteria.Proteobacteria.Gammaproteobacteria.Salinisphaerales                                                        | 0           |  |  |
| Bacteria.Proteobacteria.Gammaproteobacteria.Salinisphaerales.Salinisphaeraceae                                      | 0           |  |  |
| Bacteria.Proteobacteria.Gammaproteobacteria.Salinisphaerales.Salinisphaeraceae.Salinisphaera                        | 0           |  |  |
| Bacteria.Proteobacteria.Gammaproteobacteria.unclassified_order                                                      | 0           |  |  |
| Bacteria.Proteobacteria.Gammaproteobacteria.unclassified_order.unclassified_family                                  | 0           |  |  |
| Bacteria.Proteobacteria.Gammaproteobacteria.unclassified_order.unclassified_family.unclassified_genus               | 0           |  |  |
| Bacteria.Proteobacteria.Gammaproteobacteria.Vibrionales                                                             | 0           |  |  |
| Bacteria.Proteobacteria.Gammaproteobacteria.Vibrionales.Vibrionaceae                                                | 0           |  |  |
| Bacteria.Proteobacteria.Gammaproteobacteria.Vibrionales.Vibrionaceae.Photobacterium                                 | 0           |  |  |
| Bacteria.Proteobacteria.Gammaproteobacteria.Vibrionales.Vibrionaceae.unclassified_genus                             | 0           |  |  |
| Bacteria.Proteobacteria.Gammaproteobacteria.Vibrionales.Vibrionaceae.Vibrio                                         | 0           |  |  |
| Bacteria.Proteobacteria.Gammaproteobacteria.Xanthomonadales                                                         | 0           |  |  |
| Bacteria.Proteobacteria.Gammaproteobacteria.Xanthomonadales.Sinobacteraceae                                         | 0           |  |  |
| Bacteria.Proteobacteria.Gammaproteobacteria.Xanthomonadales.Sinobacteraceae.Steroidobacter                          | 0           |  |  |
| Bacteria.Proteobacteria.Gammaproteobacteria.Xanthomonadales.Xanthomonadaceae                                        | 0           |  |  |
| Bacteria.Proteobacteria.Gammaproteobacteria.Xanthomonadales.Xanthomonadaceae.Lysobacter                             | 0           |  |  |
| Bacteria.Proteobacteria.Gammaproteobacteria.Xanthomonadales.Xanthomonadaceae.Pseudoxanthomonas                      | 0           |  |  |
| Bacteria.Proteobacteria.Gammaproteobacteria.Xanthomonadales.Xanthomonadaceae.Stenotrophomonas                       | 0           |  |  |
| Bacteria.Proteobacteria.Gammaproteobacteria.Xanthomonadales.Xanthomonadaceae.unclassified_genus                     | 0           |  |  |
| Bacteria.Proteobacteria.Gammaproteobacteria.Xanthomonadales.Xanthomonadaceae.Wohlfahrtiimonas                       | 0           |  |  |
| Bacteria.Proteobacteria.Gammaproteobacteria.Xanthomonadales.Xanthomonadaceae.Xanthomonas                            | 0           |  |  |
| Bacteria.Proteobacteria.unclassified_class                                                                          | 0           |  |  |
| Bacteria.Proteobacteria.unclassified_class.unclassified_order                                                       | 0           |  |  |
| Bacteria.Proteobacteria.unclassified_class.unclassified_order.unclassified_family                                   | 0           |  |  |
| Bacteria.Proteobacteria.unclassified_class.unclassified_order.unclassified_family.unclassified_genus                | 0           |  |  |
| Bacteria.Spirochaetes                                                                                               | 0           |  |  |
| Bacteria.Spirochaetes.Spirochaetes                                                                                  | 0           |  |  |
| Bacteria.Spirochaetes.Spirochaetes.Spirochaetales                                                                   | 0           |  |  |
| Bacteria.Spirochaetes.Spirochaetes.Spirochaetales.Spirochaetaceae                                                   | 0           |  |  |
| Bacteria.Spirochaetes.Spirochaetes.Spirochaetales.Spirochaetaceae.Treponema                                         | 0           |  |  |
| Bacteria.SR1                                                                                                        | 0           |  |  |
| Bacteria.SR1.SR1 genera incertae sedis                                                                              | 0           |  |  |
| Bacteria.SR1.SR1 genera incertae sedis.unclassified_order                                                           | 0           |  |  |
| Bacteria.SR1.SR1 genera incertae sedis.unclassified_order.unclassified_family                                       | 0           |  |  |
| Bacteria.SR1.SR1 genera incertae sedis.unclassified_order.unclassified_family.unclassified_genus                    | 0           |  |  |
| Bacteria.Synergistetes                                                                                              | 0           |  |  |
| Bacteria.Synergistetes.Synergistia                                                                                  | 0           |  |  |
| Bacteria.Synergistetes.Synergistia.Synergistales                                                                    | 0           |  |  |
| Bacteria.Synergistetes.Synergistia.Synergistales.Synergistaceae                                                     | 0           |  |  |
| Bacteria.Synergistetes.Synergistia.Synergistales.Synergistaceae.unclassified_genus                                  | 0           |  |  |
| Bacteria.Tenericutes                                                                                                | 0           |  |  |
| Bacteria.Tenericutes.Mollicutes                                                                                     | 0           |  |  |
| Bacteria.Tenericutes.Mollicutes.Anaeroplasmatales                                                                   | 0           |  |  |
| Bacteria.Tenericutes.Mollicutes.Anaeroplasmatales.Anaeroplasmataceae                                                | 0           |  |  |
| Bacteria.Tenericutes.Mollicutes.Anaeroplasmatales.Anaeroplasmataceae.Anaeroplasma                                   | 0           |  |  |
| Bacteria.Tenericutes.Mollicutes.Mycoplasmatales                                                                     | 0           |  |  |
| Bacteria.Tenericutes.Mollicutes.Mycoplasmatales.Mycoplasmataceae                                                    | 0           |  |  |
| Bacteria.Tenericutes.Mollicutes.Mycoplasmatales.Mycoplasmataceae.Mycoplasma                                         | 0           |  |  |
| Bacteria.TM7                                                                                                        | 0           |  |  |
| Bacteria.TM7.TM7 genera incertae sedis                                                                              | 0           |  |  |
| Bacteria.TM7.TM7 genera incertae sedis.unclassified_order                                                           | 0           |  |  |
| Bacteria.TM7.TM7 genera incertae sedis.unclassified_order.unclassified_family                                       | 0           |  |  |
| Bacteria.TM7.TM7 genera incertae sedis.unclassified_order.unclassified_family.unclassified_genus                    | 0           |  |  |
| Bacteria.unclassified_phylum                                                                                        | 4.369765597 |  |  |
| Bacteria.unclassified_phylum.unclassified_class                                                                     | 4.369765597 |  |  |
| Bacteria.unclassified_phylum.unclassified_class.unclassified_order                                                  | 4.369765597 |  |  |
| Bacteria.unclassified_phylum.unclassified_class.unclassified_order.unclassified_family                              | 4.369765597 |  |  |
| Bacteria.unclassified_phylum.unclassified_class.unclassified_order.unclassified_family.unclassified_genus           | 4.369765597 |  |  |
| Bacteria.Verrucomicrobia                                                                                            | 0           |  |  |
| Bacteria.Verrucomicrobia.Opitutae                                                                                   | 0           |  |  |
| Bacteria.Verrucomicrobia.Opitutae.Opitutales                                                                        | 0           |  |  |
| Bacteria.Verrucomicrobia.Opitutae.Opitutales.Opitutaceae                                                            | 0           |  |  |
| Bacteria.Verrucomicrobia.Opitutae.Opitutales.Opitutaceae.Opitutus                                                   | 0           |  |  |
| Bacteria.Verrucomicrobia.Spartobacteria                                                                             | 0           |  |  |
| Bacteria.Verrucomicrobia.Spartobacteria.Spartobacteria genera incertae sedis                                        | 0           |  |  |
| Bacteria.Verrucomicrobia.Spartobacteria.Spartobacteria genera incertae sedis.unclassified_family                    | 0           |  |  |
| Bacteria.Verrucomicrobia.Spartobacteria.Spartobacteria genera incertae sedis.unclassified_family.unclassified_genus | 0           |  |  |
| Bacteria.Verrucomicrobia.unclassified_class                                                                         | 0           |  |  |
| Bacteria.Verrucomicrobia.unclassified_class.unclassified_order                                                      | 0           |  |  |
| Bacteria.Verrucomicrobia.unclassified_class.unclassified_order.unclassified_family                                  | 0           |  |  |
| Bacteria.Verrucomicrobia.unclassified_class.unclassified_order.unclassified_family.unclassified_genus               | 0           |  |  |
| Bacteria.Verrucomicrobia.Verrucomicrobiae                                                                           | 0           |  |  |
| Bacteria.Verrucomicrobia.Verrucomicrobiae.Verrucomicrobiales                                                        | 0           |  |  |
| Bacteria.Verrucomicrobia.Verrucomicrobiae.Verrucomicrobiales.Verrucomicrobiaceae                                    | 0           |  |  |
| Bacteria.Verrucomicrobia.Verrucomicrobiae.Verrucomicrobiales.Verrucomicrobiaceae.Akkermansia                        | 0           |  |  |

Footnotes:

1. Taxonomic assignment determined using RDP classifier to compare a representative sequence from each OTU to reference sequences in the greengenes database.

Table S17. LEfSe comparison of fishmeal-based, low density against grain-based, low density

| Taxon <sup>1</sup>                                                                                     | Log10 [(mean relative abundance) x (10 <sup>6</sup> )] from group with higher relative abundance of taxon | Group with significantly higher logarithmic LDA score | Logarithmic LDA score of higher-scoring group |
|--------------------------------------------------------------------------------------------------------|-----------------------------------------------------------------------------------------------------------|-------------------------------------------------------|-----------------------------------------------|
| Bacteria                                                                                               | 6                                                                                                         |                                                       |                                               |
| Bacteria.Acidobacteria                                                                                 | 0                                                                                                         |                                                       |                                               |
| Bacteria.Acidobacteria.Acidobacteria Gp1                                                               | 0                                                                                                         |                                                       |                                               |
| Bacteria.Acidobacteria.Acidobacteria Gp1.Gp1                                                           | 0                                                                                                         |                                                       |                                               |
| Bacteria.Acidobacteria.Acidobacteria Gp1.Gp1.unclassified_family                                       | 0                                                                                                         |                                                       |                                               |
| Bacteria.Acidobacteria.Acidobacteria Gp1.Gp1.unclassified_family.unclassified_genus                    | 0                                                                                                         |                                                       |                                               |
| Bacteria.Acidobacteria.Acidobacteria Gp16                                                              | 0                                                                                                         |                                                       |                                               |
| Bacteria.Acidobacteria.Acidobacteria Gp16.Gp16                                                         | 0                                                                                                         |                                                       |                                               |
| Bacteria.Acidobacteria.Acidobacteria Gp16.Gp16.unclassified_family                                     | 0                                                                                                         |                                                       |                                               |
| Bacteria.Acidobacteria.Acidobacteria Gp16.Gp16.unclassified_family.unclassified_genus                  | 0                                                                                                         |                                                       |                                               |
| Bacteria.Acidobacteria.Acidobacteria Gp2                                                               | 0                                                                                                         |                                                       |                                               |
| Bacteria.Acidobacteria.Acidobacteria Gp2.Gp2                                                           | 0                                                                                                         |                                                       |                                               |
| Bacteria.Acidobacteria.Acidobacteria Gp2.Gp2.unclassified_family                                       | 0                                                                                                         |                                                       |                                               |
| Bacteria.Acidobacteria.Acidobacteria Gp2.Gp2.unclassified_family.unclassified_genus                    | 0                                                                                                         |                                                       |                                               |
| Bacteria.Acidobacteria.Acidobacteria Gp3                                                               | 0                                                                                                         |                                                       |                                               |
| Bacteria.Acidobacteria.Acidobacteria Gp3.Gp3                                                           | 0                                                                                                         |                                                       |                                               |
| Bacteria.Acidobacteria.Acidobacteria Gp3.Gp3.unclassified_family                                       | 0                                                                                                         |                                                       |                                               |
| Bacteria.Acidobacteria.Acidobacteria Gp3.Gp3.unclassified_family.unclassified_genus                    | 0                                                                                                         |                                                       |                                               |
| Bacteria.Acidobacteria.Acidobacteria Gp4                                                               | 0                                                                                                         |                                                       |                                               |
| Bacteria.Acidobacteria.Acidobacteria Gp4.Gp4                                                           | 0                                                                                                         |                                                       |                                               |
| Bacteria.Acidobacteria.Acidobacteria Gp4.Gp4.unclassified_family                                       | 0                                                                                                         |                                                       |                                               |
| Bacteria.Acidobacteria.Acidobacteria Gp4.Gp4.unclassified_family.unclassified_genus                    | 0                                                                                                         |                                                       |                                               |
| Bacteria.Acidobacteria.Acidobacteria Gp5                                                               | 0                                                                                                         |                                                       |                                               |
| Bacteria.Acidobacteria.Acidobacteria Gp5.Gp5                                                           | 0                                                                                                         |                                                       |                                               |
| Bacteria.Acidobacteria.Acidobacteria Gp5.Gp5.unclassified_family                                       | 0                                                                                                         |                                                       |                                               |
| Bacteria.Acidobacteria.Acidobacteria Gp5.Gp5.unclassified_family.unclassified_genus                    | 0                                                                                                         |                                                       |                                               |
| Bacteria.Acidobacteria.Acidobacteria Gp6                                                               | 0                                                                                                         |                                                       |                                               |
| Bacteria.Acidobacteria.Acidobacteria Gp6.Gp6                                                           | 0                                                                                                         |                                                       |                                               |
| Bacteria.Acidobacteria.Acidobacteria Gp6.Gp6.unclassified_family                                       | 0                                                                                                         |                                                       |                                               |
| Bacteria.Acidobacteria.Acidobacteria Gp6.Gp6.unclassified_family.unclassified_genus                    | 0                                                                                                         |                                                       |                                               |
| Bacteria.Acidobacteria.Acidobacteria Gp7                                                               | 0                                                                                                         |                                                       |                                               |
| Bacteria.Acidobacteria.Acidobacteria Gp7.Gp7                                                           | 0                                                                                                         |                                                       |                                               |
| Bacteria.Acidobacteria.Acidobacteria Gp7.Gp7.unclassified_family                                       | 0                                                                                                         |                                                       |                                               |
| Bacteria.Acidobacteria.Acidobacteria Gp7.Gp7.unclassified_family.unclassified_genus                    | 0                                                                                                         |                                                       |                                               |
| Bacteria.Actinobacteria                                                                                | 3.387746094                                                                                               |                                                       |                                               |
| Bacteria.Actinobacteria.Actinobacteria                                                                 | 3.387746094                                                                                               |                                                       |                                               |
| Bacteria.Actinobacteria.Actinobacteria.Acidimicrobiales                                                | 0                                                                                                         |                                                       |                                               |
| Bacteria.Actinobacteria.Actinobacteria.Acidimicrobiales.Acidimicrobiaceae                              | 0                                                                                                         |                                                       |                                               |
| Bacteria.Actinobacteria.Actinobacteria.Acidimicrobiales.Acidimicrobiaceae.unclassified_genus           | 0                                                                                                         |                                                       |                                               |
| Bacteria.Actinobacteria.Actinobacteria.Acidimicrobiales.lamiaceae                                      | 0                                                                                                         |                                                       |                                               |
| Bacteria.Actinobacteria.Actinobacteria.Acidimicrobiales.lamiaceae.lamia                                | 0                                                                                                         |                                                       |                                               |
| Bacteria.Actinobacteria.Actinobacteria.Acidimicrobiales.incertae_sedis                                 | 0                                                                                                         |                                                       |                                               |
| Bacteria.Actinobacteria.Actinobacteria.Acidimicrobiales.incertae_sedis.lumatobacter                    | 0                                                                                                         |                                                       |                                               |
| Bacteria.Actinobacteria.Actinobacteria.Acidimicrobiales.incertae_sedis.lumatobacter.unclassified_genus | 0                                                                                                         |                                                       |                                               |
| Bacteria.Actinobacteria.Actinobacteria.Actinomycetales                                                 | 3.387746094                                                                                               |                                                       |                                               |
| Bacteria.Actinobacteria.Actinobacteria.Actinomycetales.Actinomycetaceae                                | 0                                                                                                         |                                                       |                                               |
| Bacteria.Actinobacteria.Actinobacteria.Actinomycetales.Actinomycetaceae.Actinomyces                    | 0                                                                                                         |                                                       |                                               |
| Bacteria.Actinobacteria.Actinobacteria.Actinomycetales.Actinomycetaceae.Arcanobacterium                | 0                                                                                                         |                                                       |                                               |
| Bacteria.Actinobacteria.Actinobacteria.Actinomycetales.Actinomycetaceae.unclassified_genus             | 0                                                                                                         |                                                       |                                               |
| Bacteria.Actinobacteria.Actinobacteria.Actinomycetales.Beutenbergiaceae                                | 0                                                                                                         |                                                       |                                               |
| Bacteria.Actinobacteria.Actinobacteria.Actinomycetales.Beutenbergiaceae.Salana                         | 0                                                                                                         |                                                       |                                               |
| Bacteria.Actinobacteria.Actinobacteria.Actinomycetales.Beutenbergiaceae.Serinibacter                   | 0                                                                                                         |                                                       |                                               |
| Bacteria.Actinobacteria.Actinobacteria.Actinomycetales.Bogoriellaceae                                  | 0                                                                                                         |                                                       |                                               |
| Bacteria.Actinobacteria.Actinobacteria.Actinomycetales.Bogoriellaceae.Georgia                          | 0                                                                                                         |                                                       |                                               |
| Bacteria.Actinobacteria.Actinobacteria.Actinomycetales.Bogoriellaceae.unclassified_genus               | 0                                                                                                         |                                                       |                                               |
| Bacteria.Actinobacteria.Actinobacteria.Actinomycetales.Brevibacteriaceae                               | 0                                                                                                         |                                                       |                                               |
| Bacteria.Actinobacteria.Actinobacteria.Actinomycetales.Brevibacteriaceae.Brevibacterium                | 0                                                                                                         |                                                       |                                               |
| Bacteria.Actinobacteria.Actinobacteria.Actinomycetales.Cellulomonadaceae                               | 0                                                                                                         |                                                       |                                               |
| Bacteria.Actinobacteria.Actinobacteria.Actinomycetales.Cellulomonadaceae.Cellulomonas                  | 0                                                                                                         |                                                       |                                               |
| Bacteria.Actinobacteria.Actinobacteria.Actinomycetales.Cellulomonadaceae.unclassified_genus            | 0                                                                                                         |                                                       |                                               |
| Bacteria.Actinobacteria.Actinobacteria.Actinomycetales.Corynebacteriaceae                              | 0                                                                                                         |                                                       |                                               |
| Bacteria.Actinobacteria.Actinobacteria.Actinomycetales.Corynebacteriaceae.Corynebacterium              | 0                                                                                                         |                                                       |                                               |
| Bacteria.Actinobacteria.Actinobacteria.Actinomycetales.Corynebacteriaceae.Turicella                    | 0                                                                                                         |                                                       |                                               |
| Bacteria.Actinobacteria.Actinobacteria.Actinomycetales.Corynebacteriaceae.unclassified_genus           | 0                                                                                                         |                                                       |                                               |
| Bacteria.Actinobacteria.Actinobacteria.Actinomycetales.Dermabacteraceae                                | 0                                                                                                         |                                                       |                                               |
| Bacteria.Actinobacteria.Actinobacteria.Actinomycetales.Dermabacteraceae.Brachybacterium                | 0                                                                                                         |                                                       |                                               |
| Bacteria.Actinobacteria.Actinobacteria.Actinomycetales.Dermacoccaceae                                  | 0                                                                                                         |                                                       |                                               |
| Bacteria.Actinobacteria.Actinobacteria.Actinomycetales.Dermacoccaceae.Dermacoccus                      | 0                                                                                                         |                                                       |                                               |
| Bacteria.Actinobacteria.Actinobacteria.Actinomycetales.Dietziaceae                                     | 0                                                                                                         |                                                       |                                               |
| Bacteria.Actinobacteria.Actinobacteria.Actinomycetales.Dietziaceae.Dietzia                             | 0                                                                                                         |                                                       |                                               |
| Bacteria.Actinobacteria.Actinobacteria.Actinomycetales.Geodermatophilaceae                             | 0                                                                                                         |                                                       |                                               |
| Bacteria.Actinobacteria.Actinobacteria.Actinomycetales.Geodermatophilaceae.Blastococcus                | 0                                                                                                         |                                                       |                                               |
| Bacteria.Actinobacteria.Actinobacteria.Actinomycetales.Geodermatophilaceae.unclassified_genus          | 0                                                                                                         |                                                       |                                               |
| Bacteria.Actinobacteria.Actinobacteria.Actinomycetales.Intrasporangiaceae                              | 0                                                                                                         |                                                       |                                               |
| Bacteria.Actinobacteria.Actinobacteria.Actinomycetales.Intrasporangiaceae.Janibacter                   | 0                                                                                                         |                                                       |                                               |
| Bacteria.Actinobacteria.Actinobacteria.Actinomycetales.Intrasporangiaceae.Knoellia                     | 0                                                                                                         |                                                       |                                               |
| Bacteria.Actinobacteria.Actinobacteria.Actinomycetales.Intrasporangiaceae.Ornithinimicrobium           | 0                                                                                                         |                                                       |                                               |
| Bacteria.Actinobacteria.Actinobacteria.Actinomycetales.Intrasporangiaceae.Tetrasphaera                 | 0                                                                                                         |                                                       |                                               |
| Bacteria.Actinobacteria.Actinobacteria.Actinomycetales.Intrasporangiaceae.unclassified_genus           | 0                                                                                                         |                                                       |                                               |
| Bacteria.Actinobacteria.Actinobacteria.Actinomycetales.Jonesiaceae                                     | 0                                                                                                         |                                                       |                                               |
| Bacteria.Actinobacteria.Actinobacteria.Actinomycetales.Jonesiaceae.Jonesia                             | 0                                                                                                         |                                                       |                                               |
| Bacteria.Actinobacteria.Actinobacteria.Actinomycetales.Microbacteriaceae                               | 0                                                                                                         |                                                       |                                               |
| Bacteria.Actinobacteria.Actinobacteria.Actinomycetales.Microbacteriaceae.Agrococcus                    | 0                                                                                                         |                                                       |                                               |
| Bacteria.Actinobacteria.Actinobacteria.Actinomycetales.Microbacteriaceae.Clavibacter                   | 0                                                                                                         |                                                       |                                               |
| Bacteria.Actinobacteria.Actinobacteria.Actinomycetales.Microbacteriaceae.Curtobacterium                | 0                                                                                                         |                                                       |                                               |
| Bacteria.Actinobacteria.Actinobacteria.Actinomycetales.Microbacteriaceae.Frigonibacterium              | 0                                                                                                         |                                                       |                                               |
| Bacteria.Actinobacteria.Actinobacteria.Actinomycetales.Microbacteriaceae.Leifsonia                     | 0                                                                                                         |                                                       |                                               |
| Bacteria.Actinobacteria.Actinobacteria.Actinomycetales.Microbacteriaceae.Leucobacter                   | 0                                                                                                         |                                                       |                                               |
| Bacteria.Actinobacteria.Actinobacteria.Actinomycetales.Microbacteriaceae.Microbacterium                | 0                                                                                                         |                                                       |                                               |
| Bacteria.Actinobacteria.Actinobacteria.Actinomycetales.Microbacteriaceae.Plantibacter                  | 0                                                                                                         |                                                       |                                               |
| Bacteria.Actinobacteria.Actinobacteria.Actinomycetales.Microbacteriaceae.Pseudoclavibacter             | 0                                                                                                         |                                                       |                                               |
| Bacteria.Actinobacteria.Actinobacteria.Actinomycetales.Microbacteriaceae.unclassified_genus            | 0                                                                                                         |                                                       |                                               |
| Bacteria.Actinobacteria.Actinobacteria.Actinomycetales.Micrococcaceae                                  | 3.387746094                                                                                               |                                                       |                                               |

|                                                                                                   |             |                |             |
|---------------------------------------------------------------------------------------------------|-------------|----------------|-------------|
| Bacteria.Actinobacteria.Actinobacteria.Actinomycetales.Micrococcaceae.Arthrobacter                | 3.387746094 |                |             |
| Bacteria.Actinobacteria.Actinobacteria.Actinomycetales.Micrococcaceae.Kocuria                     | 0           |                |             |
| Bacteria.Actinobacteria.Actinobacteria.Actinomycetales.Micrococcaceae.Micrococcus                 | 0           |                |             |
| Bacteria.Actinobacteria.Actinobacteria.Actinomycetales.Micrococcaceae.Nesterenkonia               | 0           |                |             |
| Bacteria.Actinobacteria.Actinobacteria.Actinomycetales.Micrococcaceae.Rothia                      | 0           |                |             |
| Bacteria.Actinobacteria.Actinobacteria.Actinomycetales.Micrococcaceae.unclassified_genus          | 0           |                |             |
| Bacteria.Actinobacteria.Actinobacteria.Actinomycetales.Micromonosporaceae                         | 0           |                |             |
| Bacteria.Actinobacteria.Actinobacteria.Actinomycetales.Micromonosporaceae.Luedemannella           | 0           |                |             |
| Bacteria.Actinobacteria.Actinobacteria.Actinomycetales.Micromonosporaceae.Micromonospora          | 0           |                |             |
| Bacteria.Actinobacteria.Actinobacteria.Actinomycetales.Mycobacteriaceae                           | 0           |                |             |
| Bacteria.Actinobacteria.Actinobacteria.Actinomycetales.Mycobacteriaceae.Mycobacterium             | 0           |                |             |
| Bacteria.Actinobacteria.Actinobacteria.Actinomycetales.Nocardiaceae                               | 0           |                |             |
| Bacteria.Actinobacteria.Actinobacteria.Actinomycetales.Nocardiaceae.Gordonia                      | 0           |                |             |
| Bacteria.Actinobacteria.Actinobacteria.Actinomycetales.Nocardiaceae.Rhodococcus                   | 0           |                |             |
| Bacteria.Actinobacteria.Actinobacteria.Actinomycetales.Nocardiaceae.unclassified_genus            | 0           |                |             |
| Bacteria.Actinobacteria.Actinobacteria.Actinomycetales.Nocardiaceae.Williamsia                    | 0           |                |             |
| Bacteria.Actinobacteria.Actinobacteria.Actinomycetales.Nocardioidaceae                            | 0           |                |             |
| Bacteria.Actinobacteria.Actinobacteria.Actinomycetales.Nocardioidaceae.Aeromicrobium              | 0           |                |             |
| Bacteria.Actinobacteria.Actinobacteria.Actinomycetales.Nocardioidaceae.Marmoricola                | 0           |                |             |
| Bacteria.Actinobacteria.Actinobacteria.Actinomycetales.Nocardioidaceae.Nocardioides               | 0           |                |             |
| Bacteria.Actinobacteria.Actinobacteria.Actinomycetales.Nocardioidaceae.Pimelobacter               | 0           |                |             |
| Bacteria.Actinobacteria.Actinobacteria.Actinomycetales.Nocardioidaceae.unclassified_genus         | 0           |                |             |
| Bacteria.Actinobacteria.Actinobacteria.Actinomycetales.Nocardiopsaceae                            | 0           |                |             |
| Bacteria.Actinobacteria.Actinobacteria.Actinomycetales.Nocardiopsaceae.Nocardiopsis               | 0           |                |             |
| Bacteria.Actinobacteria.Actinobacteria.Actinomycetales.Nocardiopsaceae.unclassified_genus         | 0           |                |             |
| Bacteria.Actinobacteria.Actinobacteria.Actinomycetales.Propionibacteriaceae                       | 0           |                |             |
| Bacteria.Actinobacteria.Actinobacteria.Actinomycetales.Propionibacteriaceae.Friedmannella         | 0           |                |             |
| Bacteria.Actinobacteria.Actinobacteria.Actinomycetales.Propionibacteriaceae.Microlunatus          | 0           |                |             |
| Bacteria.Actinobacteria.Actinobacteria.Actinomycetales.Propionibacteriaceae.Propionibacterium     | 0           |                |             |
| Bacteria.Actinobacteria.Actinobacteria.Actinomycetales.Propionibacteriaceae.unclassified_genus    | 0           |                |             |
| Bacteria.Actinobacteria.Actinobacteria.Actinomycetales.Pseudonocardiaceae                         | 0           |                |             |
| Bacteria.Actinobacteria.Actinobacteria.Actinomycetales.Pseudonocardiaceae.Actinomycetospora       | 0           |                |             |
| Bacteria.Actinobacteria.Actinobacteria.Actinomycetales.Pseudonocardiaceae.Pseudonocardia          | 0           |                |             |
| Bacteria.Actinobacteria.Actinobacteria.Actinomycetales.Pseudonocardiaceae.Saccharopolyspora       | 0           |                |             |
| Bacteria.Actinobacteria.Actinobacteria.Actinomycetales.Pseudonocardiaceae.unclassified_genus      | 0           |                |             |
| Bacteria.Actinobacteria.Actinobacteria.Actinomycetales.Sanguibacteraceae                          | 0           |                |             |
| Bacteria.Actinobacteria.Actinobacteria.Actinomycetales.Sanguibacteraceae.Sanguibacter             | 0           |                |             |
| Bacteria.Actinobacteria.Actinobacteria.Actinomycetales.Streptomycetaceae                          | 0           |                |             |
| Bacteria.Actinobacteria.Actinobacteria.Actinomycetales.Streptomycetaceae.Streptomyces             | 0           |                |             |
| Bacteria.Actinobacteria.Actinobacteria.Actinomycetales.Streptomycetaceae.unclassified_genus       | 0           |                |             |
| Bacteria.Actinobacteria.Actinobacteria.Actinomycetales.unclassified_family                        | 0           |                |             |
| Bacteria.Actinobacteria.Actinobacteria.Actinomycetales.unclassified_family.unclassified_genus     | 0           |                |             |
| Bacteria.Actinobacteria.Actinobacteria.Actinomycetales.Yaniellaceae                               | 0           |                |             |
| Bacteria.Actinobacteria.Actinobacteria.Actinomycetales.Yaniellaceae.Yaniella                      | 0           |                |             |
| Bacteria.Actinobacteria.Actinobacteria.Bifidobacteriales                                          | 0           |                |             |
| Bacteria.Actinobacteria.Actinobacteria.Bifidobacteriales.Bifidobacteriaceae                       | 0           |                |             |
| Bacteria.Actinobacteria.Actinobacteria.Bifidobacteriales.Bifidobacteriaceae.Aeriscardovia         | 0           |                |             |
| Bacteria.Actinobacteria.Actinobacteria.Bifidobacteriales.Bifidobacteriaceae.Bifidobacterium       | 0           |                |             |
| Bacteria.Actinobacteria.Actinobacteria.Bifidobacteriales.Bifidobacteriaceae.unclassified_genus    | 0           |                |             |
| Bacteria.Actinobacteria.Actinobacteria.Coriobacteriales                                           | 0           |                |             |
| Bacteria.Actinobacteria.Actinobacteria.Coriobacteriales.Coriobacteriaceae                         | 0           |                |             |
| Bacteria.Actinobacteria.Actinobacteria.Coriobacteriales.Coriobacteriaceae.Asaccharobacter         | 0           |                |             |
| Bacteria.Actinobacteria.Actinobacteria.Coriobacteriales.Coriobacteriaceae.Atopobium               | 0           |                |             |
| Bacteria.Actinobacteria.Actinobacteria.Coriobacteriales.Coriobacteriaceae.Collinsella             | 0           |                |             |
| Bacteria.Actinobacteria.Actinobacteria.Coriobacteriales.Coriobacteriaceae.Eggerthella             | 0           |                |             |
| Bacteria.Actinobacteria.Actinobacteria.Coriobacteriales.Coriobacteriaceae.Olsenella               | 0           |                |             |
| Bacteria.Actinobacteria.Actinobacteria.Coriobacteriales.Coriobacteriaceae.Paraeggerthella         | 0           |                |             |
| Bacteria.Actinobacteria.Actinobacteria.Coriobacteriales.Coriobacteriaceae.unclassified_genus      | 0           |                |             |
| Bacteria.Actinobacteria.Actinobacteria.Rubrobacterales                                            | 0           |                |             |
| Bacteria.Actinobacteria.Actinobacteria.Rubrobacterales.Rubrobacteraceae                           | 0           |                |             |
| Bacteria.Actinobacteria.Actinobacteria.Rubrobacterales.Rubrobacteraceae.Rubrobacter               | 0           |                |             |
| Bacteria.Actinobacteria.Actinobacteria.Solirubrobacterales                                        | 0           |                |             |
| Bacteria.Actinobacteria.Actinobacteria.Solirubrobacterales.Conexibacteraceae                      | 0           |                |             |
| Bacteria.Actinobacteria.Actinobacteria.Solirubrobacterales.Conexibacteraceae.Conexibacter         | 0           |                |             |
| Bacteria.Actinobacteria.Actinobacteria.Solirubrobacterales.Solirubrobacteraceae                   | 0           |                |             |
| Bacteria.Actinobacteria.Actinobacteria.Solirubrobacterales.Solirubrobacteraceae.Solirubrobacter   | 0           |                |             |
| Bacteria.Actinobacteria.Actinobacteria.Solirubrobacterales.unclassified_family                    | 0           |                |             |
| Bacteria.Actinobacteria.Actinobacteria.Solirubrobacterales.unclassified_family.unclassified_genus | 0           |                |             |
| Bacteria.Actinobacteria.Actinobacteria.unclassified_order                                         | 0           |                |             |
| Bacteria.Actinobacteria.Actinobacteria.unclassified_order.unclassified_family                     | 0           |                |             |
| Bacteria.Actinobacteria.Actinobacteria.unclassified_order.unclassified_family.unclassified_genus  | 0           |                |             |
| Bacteria.Aquificae                                                                                | 0           |                |             |
| Bacteria.Aquificae.Aquificae                                                                      | 0           |                |             |
| Bacteria.Aquificae.Aquificae.Aquificales                                                          | 0           |                |             |
| Bacteria.Aquificae.Aquificae.Aquificales.Hydrogenothermaceae                                      | 0           |                |             |
| Bacteria.Aquificae.Aquificae.Aquificales.Hydrogenothermaceae.Sulfurihydrogenibium                 | 0           |                |             |
| Bacteria.Bacteroidetes                                                                            | 4.39801795  |                |             |
| Bacteria.Bacteroidetes.Bacteroidia                                                                | 3.390152164 |                |             |
| Bacteria.Bacteroidetes.Bacteroidia.Bacteroidales                                                  | 3.390152164 |                |             |
| Bacteria.Bacteroidetes.Bacteroidia.Bacteroidales.Bacteroidaceae                                   | 3.081969663 |                |             |
| Bacteria.Bacteroidetes.Bacteroidia.Bacteroidales.Bacteroidaceae.Bacteroides                       | 3.081969663 |                |             |
| Bacteria.Bacteroidetes.Bacteroidia.Bacteroidales.Porphyrionadaceae                                | 3.390152164 |                |             |
| Bacteria.Bacteroidetes.Bacteroidia.Bacteroidales.Porphyrionadaceae.Dysgonomonas                   | 0           |                |             |
| Bacteria.Bacteroidetes.Bacteroidia.Bacteroidales.Porphyrionadaceae.Porphyrionadaceae              | 0           |                |             |
| Bacteria.Bacteroidetes.Bacteroidia.Bacteroidales.Porphyrionadaceae.Porphyrionadaceae              | 0           |                |             |
| Bacteria.Bacteroidetes.Bacteroidia.Bacteroidales.Porphyrionadaceae.Porphyrionadaceae              | 0           |                |             |
| Bacteria.Bacteroidetes.Bacteroidia.Bacteroidales.Porphyrionadaceae.unclassified_genus             | 3.390152164 |                |             |
| Bacteria.Bacteroidetes.Bacteroidia.Bacteroidales.Prevotellaceae                                   | 0           |                |             |
| Bacteria.Bacteroidetes.Bacteroidia.Bacteroidales.Prevotellaceae.Hallella                          | 0           |                |             |
| Bacteria.Bacteroidetes.Bacteroidia.Bacteroidales.Prevotellaceae.Prevotella                        | 0           |                |             |
| Bacteria.Bacteroidetes.Bacteroidia.Bacteroidales.Prevotellaceae.unclassified_genus                | 0           |                |             |
| Bacteria.Bacteroidetes.Bacteroidia.Bacteroidales.unclassified_family                              | 0           |                |             |
| Bacteria.Bacteroidetes.Bacteroidia.Bacteroidales.unclassified_family.unclassified_genus           | 0           |                |             |
| Bacteria.Bacteroidetes.Flavobacteria                                                              | 4.280023713 |                |             |
| Bacteria.Bacteroidetes.Flavobacteria.Flavobacteriales                                             | 4.280023713 |                |             |
| Bacteria.Bacteroidetes.Flavobacteria.Flavobacteriales.Cryomorphaceae                              | 0           |                |             |
| Bacteria.Bacteroidetes.Flavobacteria.Flavobacteriales.Cryomorphaceae.Fluvicola                    | 0           |                |             |
| Bacteria.Bacteroidetes.Flavobacteria.Flavobacteriales.Flavobacteriaceae                           | 4.280023713 |                |             |
| Bacteria.Bacteroidetes.Flavobacteria.Flavobacteriales.Flavobacteriaceae.Capnocytophaga            | 0           |                |             |
| Bacteria.Bacteroidetes.Flavobacteria.Flavobacteriales.Flavobacteriaceae.Chryseobacterium          | 4.045262684 | Fishmeal-based | 3.157342848 |
| Bacteria.Bacteroidetes.Flavobacteria.Flavobacteriales.Flavobacteriaceae.Cloacibacterium           | 3.851591741 |                |             |
| Bacteria.Bacteroidetes.Flavobacteria.Flavobacteriales.Flavobacteriaceae.Flavobacterium            | 3.086716098 |                |             |
| Bacteria.Bacteroidetes.Flavobacteria.Flavobacteriales.Flavobacteriaceae.Myroides                  | 0           |                |             |
| Bacteria.Bacteroidetes.Flavobacteria.Flavobacteriales.Flavobacteriaceae.Riemerella                | 0           |                |             |

|                                                                                                     |             |  |
|-----------------------------------------------------------------------------------------------------|-------------|--|
| Bacteria.Bacteroidetes.Flavobacteria.Flavobacteriales.Flavobacteriaceae.Salinimicrobium             | 0           |  |
| Bacteria.Bacteroidetes.Flavobacteria.Flavobacteriales.Flavobacteriaceae.unclassified_genus          | 0           |  |
| Bacteria.Bacteroidetes.Flavobacteria.Flavobacteriales.Flavobacteriaceae.Wautersiella                | 0           |  |
| Bacteria.Bacteroidetes.Flavobacteria.Flavobacteriales.unclassified_family                           | 0           |  |
| Bacteria.Bacteroidetes.Flavobacteria.Flavobacteriales.unclassified_family.unclassified_genus        | 0           |  |
| Bacteria.Bacteroidetes.Sphingobacteria                                                              | 3.692407098 |  |
| Bacteria.Bacteroidetes.Sphingobacteria.Sphingobacteriales                                           | 3.692407098 |  |
| Bacteria.Bacteroidetes.Sphingobacteria.Sphingobacteriales.Chitinophagaceae                          | 0           |  |
| Bacteria.Bacteroidetes.Sphingobacteria.Sphingobacteriales.Chitinophagaceae.Ferruginibacter          | 0           |  |
| Bacteria.Bacteroidetes.Sphingobacteria.Sphingobacteriales.Chitinophagaceae.Filimonas                | 0           |  |
| Bacteria.Bacteroidetes.Sphingobacteria.Sphingobacteriales.Chitinophagaceae.Flavisolibacter          | 0           |  |
| Bacteria.Bacteroidetes.Sphingobacteria.Sphingobacteriales.Chitinophagaceae.unclassified_genus       | 0           |  |
| Bacteria.Bacteroidetes.Sphingobacteria.Sphingobacteriales.Cytophagaceae                             | 3.675880032 |  |
| Bacteria.Bacteroidetes.Sphingobacteria.Sphingobacteriales.Cytophagaceae.Adhaeribacter               | 0           |  |
| Bacteria.Bacteroidetes.Sphingobacteria.Sphingobacteriales.Cytophagaceae.Cytophaga                   | 0           |  |
| Bacteria.Bacteroidetes.Sphingobacteria.Sphingobacteriales.Cytophagaceae.Dyadobacter                 | 0           |  |
| Bacteria.Bacteroidetes.Sphingobacteria.Sphingobacteriales.Cytophagaceae.Ermicicia                   | 0           |  |
| Bacteria.Bacteroidetes.Sphingobacteria.Sphingobacteriales.Cytophagaceae.Flectobacillus              | 3.675880032 |  |
| Bacteria.Bacteroidetes.Sphingobacteria.Sphingobacteriales.Cytophagaceae.Hymenobacter                | 0           |  |
| Bacteria.Bacteroidetes.Sphingobacteria.Sphingobacteriales.Cytophagaceae.Pontibacter                 | 0           |  |
| Bacteria.Bacteroidetes.Sphingobacteria.Sphingobacteriales.Cytophagaceae.Runella                     | 0           |  |
| Bacteria.Bacteroidetes.Sphingobacteria.Sphingobacteriales.Cytophagaceae.Sporocytophaga              | 0           |  |
| Bacteria.Bacteroidetes.Sphingobacteria.Sphingobacteriales.Cytophagaceae.unclassified_genus          | 0           |  |
| Bacteria.Bacteroidetes.Sphingobacteria.Sphingobacteriales.Sphingobacteriaceae                       | 3.56544288  |  |
| Bacteria.Bacteroidetes.Sphingobacteria.Sphingobacteriales.Sphingobacteriaceae.Nubsella              | 0           |  |
| Bacteria.Bacteroidetes.Sphingobacteria.Sphingobacteriales.Sphingobacteriaceae.Pedobacter            | 0           |  |
| Bacteria.Bacteroidetes.Sphingobacteria.Sphingobacteriales.Sphingobacteriaceae.Sphingobacterium      | 3.56544288  |  |
| Bacteria.Bacteroidetes.Sphingobacteria.Sphingobacteriales.Sphingobacteriaceae.unclassified_genus    | 0           |  |
| Bacteria.Bacteroidetes.Sphingobacteria.Sphingobacteriales.unclassified_family                       | 0           |  |
| Bacteria.Bacteroidetes.Sphingobacteria.Sphingobacteriales.unclassified_family.unclassified_genus    | 0           |  |
| Bacteria.Bacteroidetes.unclassified_class                                                           | 0           |  |
| Bacteria.Bacteroidetes.unclassified_class.unclassified_order                                        | 0           |  |
| Bacteria.Bacteroidetes.unclassified_class.unclassified_order.unclassified_family                    | 0           |  |
| Bacteria.Bacteroidetes.unclassified_class.unclassified_order.unclassified_family.unclassified_genus | 0           |  |
| Bacteria.Chloroflexi                                                                                | 0           |  |
| Bacteria.Chloroflexi.Anaerolineae                                                                   | 0           |  |
| Bacteria.Chloroflexi.Anaerolineae.Anaerolineales                                                    | 0           |  |
| Bacteria.Chloroflexi.Anaerolineae.Anaerolineales.Anaerolineaceae                                    | 0           |  |
| Bacteria.Chloroflexi.Anaerolineae.Anaerolineales.Anaerolineaceae.unclassified_genus                 | 0           |  |
| Bacteria.Chloroflexi.Caldilineae                                                                    | 0           |  |
| Bacteria.Chloroflexi.Caldilineae.Caldilineales                                                      | 0           |  |
| Bacteria.Chloroflexi.Caldilineae.Caldilineales.Caldilineaceae                                       | 0           |  |
| Bacteria.Chloroflexi.Caldilineae.Caldilineales.Caldilineaceae.Caldilinea                            | 0           |  |
| Bacteria.Chloroflexi.Thermomicrobia                                                                 | 0           |  |
| Bacteria.Chloroflexi.Thermomicrobia.Sphaerobacteriales                                              | 0           |  |
| Bacteria.Chloroflexi.Thermomicrobia.Sphaerobacteriales.Sphaerobacteraceae                           | 0           |  |
| Bacteria.Chloroflexi.Thermomicrobia.Sphaerobacteriales.Sphaerobacteraceae.Sphaerobacter             | 0           |  |
| Bacteria.Chloroflexi.Thermomicrobia.unclassified_order                                              | 0           |  |
| Bacteria.Chloroflexi.Thermomicrobia.unclassified_order.unclassified_family                          | 0           |  |
| Bacteria.Chloroflexi.Thermomicrobia.unclassified_order.unclassified_family.unclassified_genus       | 0           |  |
| Bacteria.Chloroflexi.unclassified_class                                                             | 0           |  |
| Bacteria.Chloroflexi.unclassified_class.unclassified_order                                          | 0           |  |
| Bacteria.Chloroflexi.unclassified_class.unclassified_order.unclassified_family                      | 0           |  |
| Bacteria.Chloroflexi.unclassified_class.unclassified_order.unclassified_family.unclassified_genus   | 0           |  |
| Bacteria.Deinococcus_Thermus                                                                        | 0           |  |
| Bacteria.Deinococcus_Thermus.Deinococci                                                             | 0           |  |
| Bacteria.Deinococcus_Thermus.Deinococci.Deinococcales                                               | 0           |  |
| Bacteria.Deinococcus_Thermus.Deinococci.Deinococcales.Deinococcaceae                                | 0           |  |
| Bacteria.Deinococcus_Thermus.Deinococci.Deinococcales.Deinococcaceae.Deinococcus                    | 0           |  |
| Bacteria.Deinococcus_Thermus.Deinococci.Deinococcales.Trueperaceae                                  | 0           |  |
| Bacteria.Deinococcus_Thermus.Deinococci.Deinococcales.Trueperaceae.Truepera                         | 0           |  |
| Bacteria.Deinococcus_Thermus.Deinococci.Thermales                                                   | 0           |  |
| Bacteria.Deinococcus_Thermus.Deinococci.Thermales.Thermaceae                                        | 0           |  |
| Bacteria.Deinococcus_Thermus.Deinococci.Thermales.Thermaceae.Meiothermus                            | 0           |  |
| Bacteria.Deinococcus_Thermus.Deinococci.unclassified_order                                          | 0           |  |
| Bacteria.Deinococcus_Thermus.Deinococci.unclassified_order.unclassified_family                      | 0           |  |
| Bacteria.Deinococcus_Thermus.Deinococci.unclassified_order.unclassified_family.unclassified_genus   | 0           |  |
| Bacteria.Firmicutes                                                                                 | 5.741882699 |  |
| Bacteria.Firmicutes.Bacilli                                                                         | 5.731425133 |  |
| Bacteria.Firmicutes.Bacilli.Bacillales                                                              | 4.226199611 |  |
| Bacteria.Firmicutes.Bacilli.Bacillales.Alicyclobacillaceae                                          | 0           |  |
| Bacteria.Firmicutes.Bacilli.Bacillales.Alicyclobacillaceae.Alicyclobacillus                         | 0           |  |
| Bacteria.Firmicutes.Bacilli.Bacillales.Bacillaceae                                                  | 4.043655146 |  |
| Bacteria.Firmicutes.Bacilli.Bacillales.Bacillaceae.Anoxybacillus                                    | 0           |  |
| Bacteria.Firmicutes.Bacilli.Bacillales.Bacillaceae.Bacillus                                         | 3.992838517 |  |
| Bacteria.Firmicutes.Bacilli.Bacillales.Bacillaceae.Caldalkalibacillus                               | 0           |  |
| Bacteria.Firmicutes.Bacilli.Bacillales.Bacillaceae.Cerasibacillus                                   | 0           |  |
| Bacteria.Firmicutes.Bacilli.Bacillales.Bacillaceae.Exiguobacterium                                  | 3.086716098 |  |
| Bacteria.Firmicutes.Bacilli.Bacillales.Bacillaceae.Geobacillus                                      | 0           |  |
| Bacteria.Firmicutes.Bacilli.Bacillales.Bacillaceae.Gracilibacillus                                  | 0           |  |
| Bacteria.Firmicutes.Bacilli.Bacillales.Bacillaceae.Lentibacillus                                    | 0           |  |
| Bacteria.Firmicutes.Bacilli.Bacillales.Bacillaceae.Lysinibacillus                                   | 0           |  |
| Bacteria.Firmicutes.Bacilli.Bacillales.Bacillaceae.Oceanobacillus                                   | 0           |  |
| Bacteria.Firmicutes.Bacilli.Bacillales.Bacillaceae.Ornithinibacillus                                | 0           |  |
| Bacteria.Firmicutes.Bacilli.Bacillales.Bacillaceae.Tenuibacillus                                    | 0           |  |
| Bacteria.Firmicutes.Bacilli.Bacillales.Bacillaceae.Terribacillus                                    | 0           |  |
| Bacteria.Firmicutes.Bacilli.Bacillales.Bacillaceae.Tumebacillus                                     | 0           |  |
| Bacteria.Firmicutes.Bacilli.Bacillales.Bacillaceae.unclassified_genus                               | 3.562260965 |  |
| Bacteria.Firmicutes.Bacilli.Bacillales.Bacillaceae.Ureibacillus                                     | 0           |  |
| Bacteria.Firmicutes.Bacilli.Bacillales.Bacillaceae.Virgibacillus                                    | 0           |  |
| Bacteria.Firmicutes.Bacilli.Bacillales.Bacillales_incertae_sedis                                    | 0           |  |
| Bacteria.Firmicutes.Bacilli.Bacillales.Bacillales_incertae_sedis.Rummeliibacillus                   | 0           |  |
| Bacteria.Firmicutes.Bacilli.Bacillales.Bacillales_incertae_sedis.Solibacillus                       | 0           |  |
| Bacteria.Firmicutes.Bacilli.Bacillales.Listeriaceae                                                 | 0           |  |
| Bacteria.Firmicutes.Bacilli.Bacillales.Listeriaceae.Brochothrix                                     | 0           |  |
| Bacteria.Firmicutes.Bacilli.Bacillales.Listeriaceae.Listeria                                        | 0           |  |
| Bacteria.Firmicutes.Bacilli.Bacillales.Paenibacillaceae                                             | 0           |  |
| Bacteria.Firmicutes.Bacilli.Bacillales.Paenibacillaceae.Ammoniphilus                                | 0           |  |
| Bacteria.Firmicutes.Bacilli.Bacillales.Paenibacillaceae.Aneurinibacillus                            | 0           |  |
| Bacteria.Firmicutes.Bacilli.Bacillales.Paenibacillaceae.Brevibacillus                               | 0           |  |
| Bacteria.Firmicutes.Bacilli.Bacillales.Paenibacillaceae.Cohnella                                    | 0           |  |
| Bacteria.Firmicutes.Bacilli.Bacillales.Paenibacillaceae.Oxalophagus                                 | 0           |  |
| Bacteria.Firmicutes.Bacilli.Bacillales.Paenibacillaceae.Paenibacillus                               | 0           |  |

|                                                                                       |             |                |             |
|---------------------------------------------------------------------------------------|-------------|----------------|-------------|
| Bacteria.Firmicutes.Bacilli.Bacillales.Paenibacillaceae.Saccharibacillus              | 0           |                |             |
| Bacteria.Firmicutes.Bacilli.Bacillales.Paenibacillaceae.unclassified_genus            | 0           |                |             |
| Bacteria.Firmicutes.Bacilli.Bacillales.Planococcaceae                                 | 0           |                |             |
| Bacteria.Firmicutes.Bacilli.Bacillales.Planococcaceae.Bhargavaea                      | 0           |                |             |
| Bacteria.Firmicutes.Bacilli.Bacillales.Planococcaceae.Kurthia                         | 0           |                |             |
| Bacteria.Firmicutes.Bacilli.Bacillales.Planococcaceae.Planococcus                     | 0           |                |             |
| Bacteria.Firmicutes.Bacilli.Bacillales.Planococcaceae.Planomicrobium                  | 0           |                |             |
| Bacteria.Firmicutes.Bacilli.Bacillales.Planococcaceae.Sporosarcina                    | 0           |                |             |
| Bacteria.Firmicutes.Bacilli.Bacillales.Planococcaceae.unclassified_genus              | 0           |                |             |
| Bacteria.Firmicutes.Bacilli.Bacillales.Staphylococcaceae                              | 3.778249365 | Grain-based    | 3.477650438 |
| Bacteria.Firmicutes.Bacilli.Bacillales.Staphylococcaceae.Gemella                      | 0           |                |             |
| Bacteria.Firmicutes.Bacilli.Bacillales.Staphylococcaceae.Jeotgalicoccus               | 0           |                |             |
| Bacteria.Firmicutes.Bacilli.Bacillales.Staphylococcaceae.Macrococcus                  | 0           |                |             |
| Bacteria.Firmicutes.Bacilli.Bacillales.Staphylococcaceae.Nosocomiicoccus              | 0           |                |             |
| Bacteria.Firmicutes.Bacilli.Bacillales.Staphylococcaceae.Saliniicoccus                | 0           |                |             |
| Bacteria.Firmicutes.Bacilli.Bacillales.Staphylococcaceae.Staphylococcus               | 3.778249365 | Grain-based    | 3.51558726  |
| Bacteria.Firmicutes.Bacilli.Bacillales.Thermoactinomycetaceae                         | 0           |                |             |
| Bacteria.Firmicutes.Bacilli.Bacillales.Thermoactinomycetaceae.Thermoactinomyces       | 0           |                |             |
| Bacteria.Firmicutes.Bacilli.Bacillales.Thermoactinomycetaceae.unclassified_genus      | 0           |                |             |
| Bacteria.Firmicutes.Bacilli.Bacillales.unclassified_family                            | 0           |                |             |
| Bacteria.Firmicutes.Bacilli.Bacillales.unclassified_family.unclassified_genus         | 0           |                |             |
| Bacteria.Firmicutes.Bacilli.Lactobacillales                                           | 5.717639285 |                |             |
| Bacteria.Firmicutes.Bacilli.Lactobacillales.Aerococcaceae                             | 0           |                |             |
| Bacteria.Firmicutes.Bacilli.Lactobacillales.Aerococcaceae.Abiotrophia                 | 0           |                |             |
| Bacteria.Firmicutes.Bacilli.Lactobacillales.Aerococcaceae.Aerococcus                  | 0           |                |             |
| Bacteria.Firmicutes.Bacilli.Lactobacillales.Aerococcaceae.Eremococcus                 | 0           |                |             |
| Bacteria.Firmicutes.Bacilli.Lactobacillales.Aerococcaceae.Globicatella                | 0           |                |             |
| Bacteria.Firmicutes.Bacilli.Lactobacillales.Carnobacteriaceae                         | 4.69321689  |                |             |
| Bacteria.Firmicutes.Bacilli.Lactobacillales.Carnobacteriaceae.Atopostipes             | 0           |                |             |
| Bacteria.Firmicutes.Bacilli.Lactobacillales.Carnobacteriaceae.Carnobacterium          | 4.69321689  |                |             |
| Bacteria.Firmicutes.Bacilli.Lactobacillales.Carnobacteriaceae.Desemzia                | 0           |                |             |
| Bacteria.Firmicutes.Bacilli.Lactobacillales.Carnobacteriaceae.Granulicatella          | 0           |                |             |
| Bacteria.Firmicutes.Bacilli.Lactobacillales.Carnobacteriaceae.Marinilactibacillus     | 0           |                |             |
| Bacteria.Firmicutes.Bacilli.Lactobacillales.Carnobacteriaceae.Trichococcus            | 0           |                |             |
| Bacteria.Firmicutes.Bacilli.Lactobacillales.Carnobacteriaceae.unclassified_genus      | 0           |                |             |
| Bacteria.Firmicutes.Bacilli.Lactobacillales.Enterococcaceae                           | 4.031628666 |                |             |
| Bacteria.Firmicutes.Bacilli.Lactobacillales.Enterococcaceae.Enterococcus              | 4.031628666 |                |             |
| Bacteria.Firmicutes.Bacilli.Lactobacillales.Enterococcaceae.unclassified_genus        | 0           |                |             |
| Bacteria.Firmicutes.Bacilli.Lactobacillales.Enterococcaceae.Vagococcus                | 0           |                |             |
| Bacteria.Firmicutes.Bacilli.Lactobacillales.Lactobacillaceae                          | 4.156940991 | Grain-based    | 3.748785221 |
| Bacteria.Firmicutes.Bacilli.Lactobacillales.Lactobacillaceae.Lactobacillus            | 4.156940991 | Grain-based    | 3.749054345 |
| Bacteria.Firmicutes.Bacilli.Lactobacillales.Lactobacillaceae.Pediococcus              | 0           |                |             |
| Bacteria.Firmicutes.Bacilli.Lactobacillales.Lactobacillaceae.unclassified_genus       | 0           |                |             |
| Bacteria.Firmicutes.Bacilli.Lactobacillales.Leuconostocaceae                          | 5.542249348 |                |             |
| Bacteria.Firmicutes.Bacilli.Lactobacillales.Leuconostocaceae.Leuconostoc              | 5.083808037 |                |             |
| Bacteria.Firmicutes.Bacilli.Lactobacillales.Leuconostocaceae.unclassified_genus       | 3.096367484 |                |             |
| Bacteria.Firmicutes.Bacilli.Lactobacillales.Leuconostocaceae.Weissella                | 5.356507914 |                |             |
| Bacteria.Firmicutes.Bacilli.Lactobacillales.Streptococcaceae                          | 5.171190096 | Grain-based    | 4.126232247 |
| Bacteria.Firmicutes.Bacilli.Lactobacillales.Streptococcaceae.Lactococcus              | 5.041281712 |                |             |
| Bacteria.Firmicutes.Bacilli.Lactobacillales.Streptococcaceae.Streptococcus            | 4.56980786  | Grain-based    | 3.992609372 |
| Bacteria.Firmicutes.Bacilli.Lactobacillales.Streptococcaceae.unclassified_genus       | 3.081969663 |                |             |
| Bacteria.Firmicutes.Bacilli.Lactobacillales.unclassified_family                       | 3.086716098 |                |             |
| Bacteria.Firmicutes.Bacilli.Lactobacillales.unclassified_family.unclassified_genus    | 3.086716098 |                |             |
| Bacteria.Firmicutes.Bacilli.unclassified_order                                        | 0           |                |             |
| Bacteria.Firmicutes.Bacilli.unclassified_order.unclassified_family                    | 0           |                |             |
| Bacteria.Firmicutes.Bacilli.unclassified_order.unclassified_family.unclassified_genus | 0           |                |             |
| Bacteria.Firmicutes.Clostridia                                                        | 4.169528353 | Fishmeal-based | 3.541770375 |
| Bacteria.Firmicutes.Clostridia.Clostridiales                                          | 4.169528353 | Fishmeal-based | 3.541770375 |
| Bacteria.Firmicutes.Clostridia.Clostridiales.Clostridiaceae                           | 0           |                |             |
| Bacteria.Firmicutes.Clostridia.Clostridiales.Clostridiaceae.Clostridium               | 0           |                |             |
| Bacteria.Firmicutes.Clostridia.Clostridiales.Clostridiaceae.Thermobrachium            | 0           |                |             |
| Bacteria.Firmicutes.Clostridia.Clostridiales.Clostridiaceae.unclassified_genus        | 0           |                |             |
| Bacteria.Firmicutes.Clostridia.Clostridiales.Eubacteriaceae                           | 0           |                |             |
| Bacteria.Firmicutes.Clostridia.Clostridiales.Eubacteriaceae.Eubacterium               | 0           |                |             |
| Bacteria.Firmicutes.Clostridia.Clostridiales.Eubacteriaceae.unclassified_genus        | 0           |                |             |
| Bacteria.Firmicutes.Clostridia.Clostridiales.IncertaeSedisXI                          | 3.086716098 |                |             |
| Bacteria.Firmicutes.Clostridia.Clostridiales.IncertaeSedisXI.Anaerococcus             | 0           |                |             |
| Bacteria.Firmicutes.Clostridia.Clostridiales.IncertaeSedisXI.Anaerospaera             | 0           |                |             |
| Bacteria.Firmicutes.Clostridia.Clostridiales.IncertaeSedisXI.Finegoldia               | 0           |                |             |
| Bacteria.Firmicutes.Clostridia.Clostridiales.IncertaeSedisXI.Gallicola                | 0           |                |             |
| Bacteria.Firmicutes.Clostridia.Clostridiales.IncertaeSedisXI.Parvimonas               | 0           |                |             |
| Bacteria.Firmicutes.Clostridia.Clostridiales.IncertaeSedisXI.Peptoniphilus            | 0           |                |             |
| Bacteria.Firmicutes.Clostridia.Clostridiales.IncertaeSedisXI.Sporanaerobacter         | 0           |                |             |
| Bacteria.Firmicutes.Clostridia.Clostridiales.IncertaeSedisXI.Tepidimicrobium          | 0           |                |             |
| Bacteria.Firmicutes.Clostridia.Clostridiales.IncertaeSedisXI.Tissierella              | 0           |                |             |
| Bacteria.Firmicutes.Clostridia.Clostridiales.IncertaeSedisXI.unclassified_genus       | 3.086716098 |                |             |
| Bacteria.Firmicutes.Clostridia.Clostridiales.IncertaeSedisXIII                        | 0           |                |             |
| Bacteria.Firmicutes.Clostridia.Clostridiales.IncertaeSedisXIII.Anaerovorax            | 0           |                |             |
| Bacteria.Firmicutes.Clostridia.Clostridiales.IncertaeSedisXIII.unclassified_genus     | 0           |                |             |
| Bacteria.Firmicutes.Clostridia.Clostridiales.IncertaeSedisXIV                         | 0           |                |             |
| Bacteria.Firmicutes.Clostridia.Clostridiales.IncertaeSedisXIV.Blautia                 | 0           |                |             |
| Bacteria.Firmicutes.Clostridia.Clostridiales.Lachnospiraceae                          | 0           |                |             |
| Bacteria.Firmicutes.Clostridia.Clostridiales.Lachnospiraceae.Anaerospobacter          | 0           |                |             |
| Bacteria.Firmicutes.Clostridia.Clostridiales.Lachnospiraceae.Orbacterium              | 0           |                |             |
| Bacteria.Firmicutes.Clostridia.Clostridiales.Lachnospiraceae.unclassified_genus       | 0           |                |             |
| Bacteria.Firmicutes.Clostridia.Clostridiales.Peptococcaceae                           | 0           |                |             |
| Bacteria.Firmicutes.Clostridia.Clostridiales.Peptococcaceae.Peptococcus               | 0           |                |             |
| Bacteria.Firmicutes.Clostridia.Clostridiales.Peptococcaceae.unclassified_genus        | 0           |                |             |
| Bacteria.Firmicutes.Clostridia.Clostridiales.Peptostreptococcaceae                    | 3.086716098 |                |             |
| Bacteria.Firmicutes.Clostridia.Clostridiales.Peptostreptococcaceae.Peptostreptococcus | 0           |                |             |
| Bacteria.Firmicutes.Clostridia.Clostridiales.Peptostreptococcaceae.Sporacetigenium    | 0           |                |             |
| Bacteria.Firmicutes.Clostridia.Clostridiales.Peptostreptococcaceae.unclassified_genus | 3.086716098 |                |             |
| Bacteria.Firmicutes.Clostridia.Clostridiales.Ruminococcaceae                          | 3.853899272 |                |             |
| Bacteria.Firmicutes.Clostridia.Clostridiales.Ruminococcaceae.Acetivibrio              | 0           |                |             |
| Bacteria.Firmicutes.Clostridia.Clostridiales.Ruminococcaceae.Anaeroflum               | 0           |                |             |
| Bacteria.Firmicutes.Clostridia.Clostridiales.Ruminococcaceae.Anaerotruncus            | 0           |                |             |
| Bacteria.Firmicutes.Clostridia.Clostridiales.Ruminococcaceae.Butyricoccus             | 0           |                |             |
| Bacteria.Firmicutes.Clostridia.Clostridiales.Ruminococcaceae.Faecalibacterium         | 0           |                |             |
| Bacteria.Firmicutes.Clostridia.Clostridiales.Ruminococcaceae.Oscillibacter            | 0           |                |             |
| Bacteria.Firmicutes.Clostridia.Clostridiales.Ruminococcaceae.Ruminococcus             | 0           |                |             |
| Bacteria.Firmicutes.Clostridia.Clostridiales.Ruminococcaceae.Subdoligranulum          | 0           |                |             |
| Bacteria.Firmicutes.Clostridia.Clostridiales.Ruminococcaceae.unclassified_genus       | 3.853899272 |                |             |
| Bacteria.Firmicutes.Clostridia.Clostridiales.unclassified_family                      | 0           |                |             |



|                                                                                                                 |             |                |             |
|-----------------------------------------------------------------------------------------------------------------|-------------|----------------|-------------|
| Bacteria.Firmicutes.Clostridia.Clostridiales.unclassified_family.unclassified_genus                             | 0           |                |             |
| Bacteria.Firmicutes.Clostridia.Clostridiales.Veillonellaceae                                                    | 3.936658981 | Fishmeal-based | 3.314626044 |
| Bacteria.Firmicutes.Clostridia.Clostridiales.Veillonellaceae.Anaerococcus                                       | 0           |                |             |
| Bacteria.Firmicutes.Clostridia.Clostridiales.Veillonellaceae.Dialister                                          | 0           |                |             |
| Bacteria.Firmicutes.Clostridia.Clostridiales.Veillonellaceae.Megasphaera                                        | 0           |                |             |
| Bacteria.Firmicutes.Clostridia.Clostridiales.Veillonellaceae.Phascolarctobacterium                              | 0           |                |             |
| Bacteria.Firmicutes.Clostridia.Clostridiales.Veillonellaceae.Selenomonas                                        | 0           |                |             |
| Bacteria.Firmicutes.Clostridia.Clostridiales.Veillonellaceae.Sporomusa                                          | 0           |                |             |
| Bacteria.Firmicutes.Clostridia.Clostridiales.Veillonellaceae.Sporotalea                                         | 0           |                |             |
| Bacteria.Firmicutes.Clostridia.Clostridiales.Veillonellaceae.unclassified_genus                                 | 0           |                |             |
| Bacteria.Firmicutes.Clostridia.Clostridiales.Veillonellaceae.Veillonella                                        | 3.936658981 | Fishmeal-based | 3.349332314 |
| Bacteria.Firmicutes.Clostridia.unclassified_order                                                               | 0           |                |             |
| Bacteria.Firmicutes.Clostridia.unclassified_order.unclassified_family                                           | 0           |                |             |
| Bacteria.Firmicutes.Clostridia.unclassified_order.unclassified_family.unclassified_genus                        | 0           |                |             |
| Bacteria.Firmicutes.Erysipelotrichi                                                                             | 0           |                |             |
| Bacteria.Firmicutes.Erysipelotrichi.Erysipelotrichales                                                          | 0           |                |             |
| Bacteria.Firmicutes.Erysipelotrichi.Erysipelotrichales.Erysipelotrichaceae                                      | 0           |                |             |
| Bacteria.Firmicutes.Erysipelotrichi.Erysipelotrichales.Erysipelotrichaceae.Allobaculum                          | 0           |                |             |
| Bacteria.Firmicutes.Erysipelotrichi.Erysipelotrichales.Erysipelotrichaceae.Erysipelothrix                       | 0           |                |             |
| Bacteria.Firmicutes.Erysipelotrichi.Erysipelotrichales.Erysipelotrichaceae.Turicibacter                         | 0           |                |             |
| Bacteria.Firmicutes.Erysipelotrichi.Erysipelotrichales.Erysipelotrichaceae.unclassified_genus                   | 0           |                |             |
| Bacteria.Firmicutes.unclassified_class                                                                          | 0           |                |             |
| Bacteria.Firmicutes.unclassified_class.unclassified_order                                                       | 0           |                |             |
| Bacteria.Firmicutes.unclassified_class.unclassified_order.unclassified_family                                   | 0           |                |             |
| Bacteria.Firmicutes.unclassified_class.unclassified_order.unclassified_family.unclassified_genus                | 0           |                |             |
| Bacteria.Fusobacteria                                                                                           | 0           |                |             |
| Bacteria.Fusobacteria.Fusobacteria                                                                              | 0           |                |             |
| Bacteria.Fusobacteria.Fusobacteria.Fusobacteriales                                                              | 0           |                |             |
| Bacteria.Fusobacteria.Fusobacteria.Fusobacteriales.Fusobacteriaceae                                             | 0           |                |             |
| Bacteria.Fusobacteria.Fusobacteria.Fusobacteriales.Fusobacteriaceae.Cetobacterium                               | 0           |                |             |
| Bacteria.Fusobacteria.Fusobacteria.Fusobacteriales.Fusobacteriaceae.Fusobacterium                               | 0           |                |             |
| Bacteria.Fusobacteria.Fusobacteria.Fusobacteriales.Fusobacteriaceae.unclassified_genus                          | 0           |                |             |
| Bacteria.Fusobacteria.Fusobacteria.Fusobacteriales.Leptotrichiaceae                                             | 0           |                |             |
| Bacteria.Fusobacteria.Fusobacteria.Fusobacteriales.Leptotrichiaceae.Leptotrichia                                | 0           |                |             |
| Bacteria.Fusobacteria.Fusobacteria.Fusobacteriales.Leptotrichiaceae.Sealdella                                   | 0           |                |             |
| Bacteria.Fusobacteria.Fusobacteria.Fusobacteriales.unclassified_family                                          | 0           |                |             |
| Bacteria.Fusobacteria.Fusobacteria.Fusobacteriales.unclassified_family.unclassified_genus                       | 0           |                |             |
| Bacteria.Gemmatimonadetes                                                                                       | 0           |                |             |
| Bacteria.Gemmatimonadetes.Gemmatimonadetes                                                                      | 0           |                |             |
| Bacteria.Gemmatimonadetes.Gemmatimonadetes.Gemmatimonadales                                                     | 0           |                |             |
| Bacteria.Gemmatimonadetes.Gemmatimonadetes.Gemmatimonadales.Gemmatimonadaceae                                   | 0           |                |             |
| Bacteria.Gemmatimonadetes.Gemmatimonadetes.Gemmatimonadales.Gemmatimonadaceae.Gemmatimonas                      | 0           |                |             |
| Bacteria.Nitrospira                                                                                             | 0           |                |             |
| Bacteria.Nitrospira.Nitrospira                                                                                  | 0           |                |             |
| Bacteria.Nitrospira.Nitrospira.Nitrospirales                                                                    | 0           |                |             |
| Bacteria.Nitrospira.Nitrospira.Nitrospirales.Nitrospiraceae                                                     | 0           |                |             |
| Bacteria.Nitrospira.Nitrospira.Nitrospirales.Nitrospiraceae.Nitrospira                                          | 0           |                |             |
| Bacteria.OD1                                                                                                    | 0           |                |             |
| Bacteria.OD1.OD1_genera_incertae_sedis                                                                          | 0           |                |             |
| Bacteria.OD1.OD1_genera_incertae_sedis.unclassified_order                                                       | 0           |                |             |
| Bacteria.OD1.OD1_genera_incertae_sedis.unclassified_order.unclassified_family                                   | 0           |                |             |
| Bacteria.OD1.OD1_genera_incertae_sedis.unclassified_order.unclassified_family.unclassified_genus                | 0           |                |             |
| Bacteria.Planctomycetes                                                                                         | 0           |                |             |
| Bacteria.Planctomycetes.Planctomycetacia                                                                        | 0           |                |             |
| Bacteria.Planctomycetes.Planctomycetacia.Planctomycetales                                                       | 0           |                |             |
| Bacteria.Planctomycetes.Planctomycetacia.Planctomycetales.Planctomycetaceae                                     | 0           |                |             |
| Bacteria.Planctomycetes.Planctomycetacia.Planctomycetales.Planctomycetaceae.Gemmata                             | 0           |                |             |
| Bacteria.Planctomycetes.Planctomycetacia.Planctomycetales.Planctomycetaceae.Planctomyces                        | 0           |                |             |
| Bacteria.Planctomycetes.Planctomycetacia.Planctomycetales.Planctomycetaceae.Rhodopirellula                      | 0           |                |             |
| Bacteria.Planctomycetes.Planctomycetacia.Planctomycetales.Planctomycetaceae.Singulisphaera                      | 0           |                |             |
| Bacteria.Planctomycetes.Planctomycetacia.Planctomycetales.Planctomycetaceae.unclassified_genus                  | 0           |                |             |
| Bacteria.Proteobacteria                                                                                         | 5.654300166 |                |             |
| Bacteria.Proteobacteria.Alphaproteobacteria                                                                     | 5.342557482 |                |             |
| Bacteria.Proteobacteria.Alphaproteobacteria.Alphaproteobacteria_incertae_sedis                                  | 3.077274542 |                |             |
| Bacteria.Proteobacteria.Alphaproteobacteria.Alphaproteobacteria_incertae_sedis.Novispirillum                    | 3.077274542 |                |             |
| Bacteria.Proteobacteria.Alphaproteobacteria.Alphaproteobacteria_incertae_sedis.Novispirillum.unclassified_genus | 3.077274542 |                |             |
| Bacteria.Proteobacteria.Alphaproteobacteria.Caulobacterales                                                     | 0           |                |             |
| Bacteria.Proteobacteria.Alphaproteobacteria.Caulobacterales.Caulobacteraceae                                    | 0           |                |             |
| Bacteria.Proteobacteria.Alphaproteobacteria.Caulobacterales.Caulobacteraceae.Asticcacaulis                      | 0           |                |             |
| Bacteria.Proteobacteria.Alphaproteobacteria.Caulobacterales.Caulobacteraceae.Brevundimonas                      | 0           |                |             |
| Bacteria.Proteobacteria.Alphaproteobacteria.Caulobacterales.Caulobacteraceae.Caulobacter                        | 0           |                |             |
| Bacteria.Proteobacteria.Alphaproteobacteria.Caulobacterales.Caulobacteraceae.Phenylobacterium                   | 0           |                |             |
| Bacteria.Proteobacteria.Alphaproteobacteria.Caulobacterales.Caulobacteraceae.unclassified_genus                 | 0           |                |             |
| Bacteria.Proteobacteria.Alphaproteobacteria.Rhizobiales                                                         | 4.1699359   |                |             |
| Bacteria.Proteobacteria.Alphaproteobacteria.Rhizobiales.Bradyrhizobiaceae                                       | 4.155768941 |                |             |
| Bacteria.Proteobacteria.Alphaproteobacteria.Rhizobiales.Bradyrhizobiaceae.Agromonas                             | 0           |                |             |
| Bacteria.Proteobacteria.Alphaproteobacteria.Rhizobiales.Bradyrhizobiaceae.Bosea                                 | 0           |                |             |
| Bacteria.Proteobacteria.Alphaproteobacteria.Rhizobiales.Bradyrhizobiaceae.unclassified_genus                    | 4.155768941 |                |             |
| Bacteria.Proteobacteria.Alphaproteobacteria.Rhizobiales.Brucellaceae                                            | 0           |                |             |
| Bacteria.Proteobacteria.Alphaproteobacteria.Rhizobiales.Brucellaceae.Ochrobactrum                               | 0           |                |             |
| Bacteria.Proteobacteria.Alphaproteobacteria.Rhizobiales.Hyphomicrobiaceae                                       | 0           |                |             |
| Bacteria.Proteobacteria.Alphaproteobacteria.Rhizobiales.Hyphomicrobiaceae.Devosia                               | 0           |                |             |
| Bacteria.Proteobacteria.Alphaproteobacteria.Rhizobiales.Hyphomicrobiaceae.unclassified_genus                    | 0           |                |             |
| Bacteria.Proteobacteria.Alphaproteobacteria.Rhizobiales.Methylobacteriaceae                                     | 0           |                |             |
| Bacteria.Proteobacteria.Alphaproteobacteria.Rhizobiales.Methylobacteriaceae.Methylobacterium                    | 0           |                |             |
| Bacteria.Proteobacteria.Alphaproteobacteria.Rhizobiales.Methylocystaceae                                        | 0           |                |             |
| Bacteria.Proteobacteria.Alphaproteobacteria.Rhizobiales.Methylocystaceae.Methylocystis                          | 0           |                |             |
| Bacteria.Proteobacteria.Alphaproteobacteria.Rhizobiales.Rhizobiaceae                                            | 0           |                |             |
| Bacteria.Proteobacteria.Alphaproteobacteria.Rhizobiales.Rhizobiaceae.Rhizobium                                  | 0           |                |             |
| Bacteria.Proteobacteria.Alphaproteobacteria.Rhizobiales.Rhizobiaceae.Sinorhizobium                              | 0           |                |             |
| Bacteria.Proteobacteria.Alphaproteobacteria.Rhizobiales.unclassified_family                                     | 3.086716098 |                |             |
| Bacteria.Proteobacteria.Alphaproteobacteria.Rhizobiales.unclassified_family.unclassified_genus                  | 3.086716098 |                |             |
| Bacteria.Proteobacteria.Alphaproteobacteria.Rhizobiales.Xanthobacteraceae                                       | 0           |                |             |
| Bacteria.Proteobacteria.Alphaproteobacteria.Rhizobiales.Xanthobacteraceae.Azorhizobium                          | 0           |                |             |
| Bacteria.Proteobacteria.Alphaproteobacteria.Rhodobacteriales                                                    | 0           |                |             |
| Bacteria.Proteobacteria.Alphaproteobacteria.Rhodobacteriales.Rhodobacteraceae                                   | 0           |                |             |
| Bacteria.Proteobacteria.Alphaproteobacteria.Rhodobacteriales.Rhodobacteraceae.Haematobacter                     | 0           |                |             |
| Bacteria.Proteobacteria.Alphaproteobacteria.Rhodobacteriales.Rhodobacteraceae.Pannonibacter                     | 0           |                |             |
| Bacteria.Proteobacteria.Alphaproteobacteria.Rhodobacteriales.Rhodobacteraceae.Paracoccus                        | 0           |                |             |
| Bacteria.Proteobacteria.Alphaproteobacteria.Rhodobacteriales.Rhodobacteraceae.Rhodobacter                       | 0           |                |             |
| Bacteria.Proteobacteria.Alphaproteobacteria.Rhodobacteriales.Rhodobacteraceae.Rubellimicrobium                  | 0           |                |             |
| Bacteria.Proteobacteria.Alphaproteobacteria.Rhodobacteriales.Rhodobacteraceae.unclassified_genus                | 0           |                |             |
| Bacteria.Proteobacteria.Alphaproteobacteria.Rhodospirillales                                                    | 0           |                |             |

|                                                                                                              |             |  |  |
|--------------------------------------------------------------------------------------------------------------|-------------|--|--|
| Bacteria.Proteobacteria.Alphaproteobacteria.Rhodospirillales.Acetobacteraceae                                | 0           |  |  |
| Bacteria.Proteobacteria.Alphaproteobacteria.Rhodospirillales.Acetobacteraceae.Acetobacter                    | 0           |  |  |
| Bacteria.Proteobacteria.Alphaproteobacteria.Rhodospirillales.Acetobacteraceae.Belnapia                       | 0           |  |  |
| Bacteria.Proteobacteria.Alphaproteobacteria.Rhodospirillales.Acetobacteraceae.Gluconacetobacter              | 0           |  |  |
| Bacteria.Proteobacteria.Alphaproteobacteria.Rhodospirillales.Acetobacteraceae.Gluconobacter                  | 0           |  |  |
| Bacteria.Proteobacteria.Alphaproteobacteria.Rhodospirillales.Acetobacteraceae.Roseococcus                    | 0           |  |  |
| Bacteria.Proteobacteria.Alphaproteobacteria.Rhodospirillales.Acetobacteraceae.Roseomonas                     | 0           |  |  |
| Bacteria.Proteobacteria.Alphaproteobacteria.Rhodospirillales.Acetobacteraceae.unclassified_genus             | 0           |  |  |
| Bacteria.Proteobacteria.Alphaproteobacteria.Rhodospirillales.Rhodospirillaceae                               | 0           |  |  |
| Bacteria.Proteobacteria.Alphaproteobacteria.Rhodospirillales.Rhodospirillaceae.Azospirillum                  | 0           |  |  |
| Bacteria.Proteobacteria.Alphaproteobacteria.Rhodospirillales.Rhodospirillaceae.Skermanella                   | 0           |  |  |
| Bacteria.Proteobacteria.Alphaproteobacteria.Rhodospirillales.Rhodospirillaceae.Telmatospirillum              | 0           |  |  |
| Bacteria.Proteobacteria.Alphaproteobacteria.Rhodospirillales.Rhodospirillaceae.unclassified_genus            | 0           |  |  |
| Bacteria.Proteobacteria.Alphaproteobacteria.Sphingomonadales                                                 | 5.310819213 |  |  |
| Bacteria.Proteobacteria.Alphaproteobacteria.Sphingomonadales.Erythrobacteraceae                              | 0           |  |  |
| Bacteria.Proteobacteria.Alphaproteobacteria.Sphingomonadales.Erythrobacteraceae.Porphryobacter               | 0           |  |  |
| Bacteria.Proteobacteria.Alphaproteobacteria.Sphingomonadales.Sphingomonadaceae                               | 5.310819213 |  |  |
| Bacteria.Proteobacteria.Alphaproteobacteria.Sphingomonadales.Sphingomonadaceae.Blastomonas                   | 0           |  |  |
| Bacteria.Proteobacteria.Alphaproteobacteria.Sphingomonadales.Sphingomonadaceae.Novosphingobium               | 0           |  |  |
| Bacteria.Proteobacteria.Alphaproteobacteria.Sphingomonadales.Sphingomonadaceae.Sphingobium                   | 0           |  |  |
| Bacteria.Proteobacteria.Alphaproteobacteria.Sphingomonadales.Sphingomonadaceae.Sphingomonas                  | 5.262597354 |  |  |
| Bacteria.Proteobacteria.Alphaproteobacteria.Sphingomonadales.Sphingomonadaceae.unclassified_genus            | 4.332390989 |  |  |
| Bacteria.Proteobacteria.Alphaproteobacteria.Sphingomonadales.unclassified_family                             | 0           |  |  |
| Bacteria.Proteobacteria.Alphaproteobacteria.Sphingomonadales.unclassified_family.unclassified_genus          | 0           |  |  |
| Bacteria.Proteobacteria.Alphaproteobacteria.unclassified_order                                               | 0           |  |  |
| Bacteria.Proteobacteria.Alphaproteobacteria.unclassified_order.unclassified_family                           | 0           |  |  |
| Bacteria.Proteobacteria.Alphaproteobacteria.unclassified_order.unclassified_family.unclassified_genus        | 0           |  |  |
| Bacteria.Proteobacteria.Betaproteobacteria                                                                   | 4.522829566 |  |  |
| Bacteria.Proteobacteria.Betaproteobacteria.Burkholderiales                                                   | 4.455610829 |  |  |
| Bacteria.Proteobacteria.Betaproteobacteria.Burkholderiales.Alcaligenaceae                                    | 0           |  |  |
| Bacteria.Proteobacteria.Betaproteobacteria.Burkholderiales.Alcaligenaceae.Achromobacter                      | 0           |  |  |
| Bacteria.Proteobacteria.Betaproteobacteria.Burkholderiales.Alcaligenaceae.Alcaligenes                        | 0           |  |  |
| Bacteria.Proteobacteria.Betaproteobacteria.Burkholderiales.Alcaligenaceae.Sutterella                         | 0           |  |  |
| Bacteria.Proteobacteria.Betaproteobacteria.Burkholderiales.Alcaligenaceae.unclassified_genus                 | 0           |  |  |
| Bacteria.Proteobacteria.Betaproteobacteria.Burkholderiales.Burkholderiaceae                                  | 0           |  |  |
| Bacteria.Proteobacteria.Betaproteobacteria.Burkholderiales.Burkholderiaceae.Burkholderia                     | 0           |  |  |
| Bacteria.Proteobacteria.Betaproteobacteria.Burkholderiales.Burkholderiaceae.Chilimonas                       | 0           |  |  |
| Bacteria.Proteobacteria.Betaproteobacteria.Burkholderiales.Burkholderiaceae.Cupriavidus                      | 0           |  |  |
| Bacteria.Proteobacteria.Betaproteobacteria.Burkholderiales.Burkholderiaceae.Pandoraea                        | 0           |  |  |
| Bacteria.Proteobacteria.Betaproteobacteria.Burkholderiales.Burkholderiaceae.Polynucleobacter                 | 0           |  |  |
| Bacteria.Proteobacteria.Betaproteobacteria.Burkholderiales.Burkholderiaceae.Ralstonia                        | 0           |  |  |
| Bacteria.Proteobacteria.Betaproteobacteria.Burkholderiales.Burkholderiaceae.unclassified_genus               | 0           |  |  |
| Bacteria.Proteobacteria.Betaproteobacteria.Burkholderiales.Burkholderiales_incertae_sedis                    | 3.072629637 |  |  |
| Bacteria.Proteobacteria.Betaproteobacteria.Burkholderiales.Burkholderiales_incertae_sedis.Aquabacterium      | 3.072629637 |  |  |
| Bacteria.Proteobacteria.Betaproteobacteria.Burkholderiales.Burkholderiales_incertae_sedis.Ideonella          | 0           |  |  |
| Bacteria.Proteobacteria.Betaproteobacteria.Burkholderiales.Burkholderiales_incertae_sedis.Lepidothrix        | 0           |  |  |
| Bacteria.Proteobacteria.Betaproteobacteria.Burkholderiales.Burkholderiales_incertae_sedis.Tepidimonas        | 0           |  |  |
| Bacteria.Proteobacteria.Betaproteobacteria.Burkholderiales.Burkholderiales_incertae_sedis.unclassified_genus | 0           |  |  |
| Bacteria.Proteobacteria.Betaproteobacteria.Burkholderiales.Comamonadaceae                                    | 4.331071289 |  |  |
| Bacteria.Proteobacteria.Betaproteobacteria.Burkholderiales.Comamonadaceae.Acidovorax                         | 4.25189673  |  |  |
| Bacteria.Proteobacteria.Betaproteobacteria.Burkholderiales.Comamonadaceae.Alicyclophilus                     | 0           |  |  |
| Bacteria.Proteobacteria.Betaproteobacteria.Burkholderiales.Comamonadaceae.Comamonas                          | 0           |  |  |
| Bacteria.Proteobacteria.Betaproteobacteria.Burkholderiales.Comamonadaceae.Curvibacter                        | 0           |  |  |
| Bacteria.Proteobacteria.Betaproteobacteria.Burkholderiales.Comamonadaceae.Delftia                            | 0           |  |  |
| Bacteria.Proteobacteria.Betaproteobacteria.Burkholderiales.Comamonadaceae.Diaphorobacter                     | 3.552886606 |  |  |
| Bacteria.Proteobacteria.Betaproteobacteria.Burkholderiales.Comamonadaceae.Hydrogenophaga                     | 0           |  |  |
| Bacteria.Proteobacteria.Betaproteobacteria.Burkholderiales.Comamonadaceae.Pelomonas                          | 0           |  |  |
| Bacteria.Proteobacteria.Betaproteobacteria.Burkholderiales.Comamonadaceae.Polaromonas                        | 0           |  |  |
| Bacteria.Proteobacteria.Betaproteobacteria.Burkholderiales.Comamonadaceae.Rhodoferrax                        | 0           |  |  |
| Bacteria.Proteobacteria.Betaproteobacteria.Burkholderiales.Comamonadaceae.unclassified_genus                 | 0           |  |  |
| Bacteria.Proteobacteria.Betaproteobacteria.Burkholderiales.Comamonadaceae.Variovorax                         | 0           |  |  |
| Bacteria.Proteobacteria.Betaproteobacteria.Burkholderiales.Oxalobacteraceae                                  | 3.077274542 |  |  |
| Bacteria.Proteobacteria.Betaproteobacteria.Burkholderiales.Oxalobacteraceae.Duganella                        | 0           |  |  |
| Bacteria.Proteobacteria.Betaproteobacteria.Burkholderiales.Oxalobacteraceae.Herbaspirillum                   | 0           |  |  |
| Bacteria.Proteobacteria.Betaproteobacteria.Burkholderiales.Oxalobacteraceae.Janthinobacterium                | 0           |  |  |
| Bacteria.Proteobacteria.Betaproteobacteria.Burkholderiales.Oxalobacteraceae.Massilia                         | 0           |  |  |
| Bacteria.Proteobacteria.Betaproteobacteria.Burkholderiales.Oxalobacteraceae.Oxalobacter                      | 0           |  |  |
| Bacteria.Proteobacteria.Betaproteobacteria.Burkholderiales.Oxalobacteraceae.unclassified_genus               | 3.077274542 |  |  |
| Bacteria.Proteobacteria.Betaproteobacteria.Burkholderiales.unclassified_family                               | 3.675880032 |  |  |
| Bacteria.Proteobacteria.Betaproteobacteria.Burkholderiales.unclassified_family.unclassified_genus            | 3.675880032 |  |  |
| Bacteria.Proteobacteria.Betaproteobacteria.Hydrogenophiales                                                  | 0           |  |  |
| Bacteria.Proteobacteria.Betaproteobacteria.Hydrogenophiales.Hydrogenophilaceae                               | 0           |  |  |
| Bacteria.Proteobacteria.Betaproteobacteria.Hydrogenophiales.Hydrogenophilaceae.Hydrogenophilus               | 0           |  |  |
| Bacteria.Proteobacteria.Betaproteobacteria.Hydrogenophiales.Hydrogenophilaceae.Petrobacter                   | 0           |  |  |
| Bacteria.Proteobacteria.Betaproteobacteria.Methylophilales                                                   | 0           |  |  |
| Bacteria.Proteobacteria.Betaproteobacteria.Methylophilales.Methylophilaceae                                  | 0           |  |  |
| Bacteria.Proteobacteria.Betaproteobacteria.Methylophilales.Methylophilaceae.Methylobacillus                  | 0           |  |  |
| Bacteria.Proteobacteria.Betaproteobacteria.Methylophilales.Methylophilaceae.Methylophilus                    | 0           |  |  |
| Bacteria.Proteobacteria.Betaproteobacteria.Methylophilales.Methylophilaceae.unclassified_genus               | 0           |  |  |
| Bacteria.Proteobacteria.Betaproteobacteria.Neisseriales                                                      | 3.679359642 |  |  |
| Bacteria.Proteobacteria.Betaproteobacteria.Neisseriales.Neisseriaceae                                        | 3.679359642 |  |  |
| Bacteria.Proteobacteria.Betaproteobacteria.Neisseriales.Neisseriaceae.Aquitalea                              | 0           |  |  |
| Bacteria.Proteobacteria.Betaproteobacteria.Neisseriales.Neisseriaceae.Kingella                               | 0           |  |  |
| Bacteria.Proteobacteria.Betaproteobacteria.Neisseriales.Neisseriaceae.Microvirgula                           | 3.387746094 |  |  |
| Bacteria.Proteobacteria.Betaproteobacteria.Neisseriales.Neisseriaceae.Neisseria                              | 0           |  |  |
| Bacteria.Proteobacteria.Betaproteobacteria.Neisseriales.Neisseriaceae.unclassified_genus                     | 0           |  |  |
| Bacteria.Proteobacteria.Betaproteobacteria.Neisseriales.Neisseriaceae.Urubuella                              | 0           |  |  |
| Bacteria.Proteobacteria.Betaproteobacteria.Neisseriales.Neisseriaceae.Vitreoscilla                           | 0           |  |  |
| Bacteria.Proteobacteria.Betaproteobacteria.Neisseriales.Neisseriaceae.Vogesella                              | 3.378304538 |  |  |
| Bacteria.Proteobacteria.Betaproteobacteria.Nitrosomonadales                                                  | 0           |  |  |
| Bacteria.Proteobacteria.Betaproteobacteria.Nitrosomonadales.Nitrosomonadaceae                                | 0           |  |  |
| Bacteria.Proteobacteria.Betaproteobacteria.Nitrosomonadales.Nitrosomonadaceae.Nitrosospora                   | 0           |  |  |
| Bacteria.Proteobacteria.Betaproteobacteria.Nitrosomonadales.Nitrosomonadaceae.unclassified_genus             | 0           |  |  |
| Bacteria.Proteobacteria.Betaproteobacteria.Rhodocyclales                                                     | 0           |  |  |
| Bacteria.Proteobacteria.Betaproteobacteria.Rhodocyclales.Rhodocyclaceae                                      | 0           |  |  |
| Bacteria.Proteobacteria.Betaproteobacteria.Rhodocyclales.Rhodocyclaceae.Azonexus                             | 0           |  |  |
| Bacteria.Proteobacteria.Betaproteobacteria.Rhodocyclales.Rhodocyclaceae.Azospira                             | 0           |  |  |
| Bacteria.Proteobacteria.Betaproteobacteria.Rhodocyclales.Rhodocyclaceae.Dechloromonas                        | 0           |  |  |
| Bacteria.Proteobacteria.Betaproteobacteria.Rhodocyclales.Rhodocyclaceae.Methyloversatilis                    | 0           |  |  |
| Bacteria.Proteobacteria.Betaproteobacteria.Rhodocyclales.Rhodocyclaceae.Propriionivibrio                     | 0           |  |  |
| Bacteria.Proteobacteria.Betaproteobacteria.Rhodocyclales.Rhodocyclaceae.Shinella                             | 0           |  |  |
| Bacteria.Proteobacteria.Betaproteobacteria.Rhodocyclales.Rhodocyclaceae.Thaueria                             | 0           |  |  |
| Bacteria.Proteobacteria.Betaproteobacteria.Rhodocyclales.Rhodocyclaceae.unclassified_genus                   | 0           |  |  |

|                                                                                                             |             |                |             |
|-------------------------------------------------------------------------------------------------------------|-------------|----------------|-------------|
| Bacteria.Proteobacteria.Betaproteobacteria.Rhodocyclales.Rhodocyclaceae.Zoogloea                            | 0           |                |             |
| Bacteria.Proteobacteria.Betaproteobacteria.unclassified_order                                               | 0           |                |             |
| Bacteria.Proteobacteria.Betaproteobacteria.unclassified_order.unclassified_family                           | 0           |                |             |
| Bacteria.Proteobacteria.Betaproteobacteria.unclassified_order.unclassified_family.unclassified_genus        | 0           |                |             |
| Bacteria.Proteobacteria.Deltaproteobacteria                                                                 | 0           |                |             |
| Bacteria.Proteobacteria.Deltaproteobacteria.Bdellovibrionales                                               | 0           |                |             |
| Bacteria.Proteobacteria.Deltaproteobacteria.Bdellovibrionales.Bacteriovoraceae                              | 0           |                |             |
| Bacteria.Proteobacteria.Deltaproteobacteria.Bdellovibrionales.Bacteriovoraceae.Bacteriovorax                | 0           |                |             |
| Bacteria.Proteobacteria.Deltaproteobacteria.Bdellovibrionales.Bacteriovoraceae.Peredibacter                 | 0           |                |             |
| Bacteria.Proteobacteria.Deltaproteobacteria.Bdellovibrionales.Bdellovibrionaceae                            | 0           |                |             |
| Bacteria.Proteobacteria.Deltaproteobacteria.Bdellovibrionales.Bdellovibrionaceae.Bdellovibrio               | 0           |                |             |
| Bacteria.Proteobacteria.Deltaproteobacteria.Desulfovibrionales                                              | 0           |                |             |
| Bacteria.Proteobacteria.Deltaproteobacteria.Desulfovibrionales.Desulfovibrionaceae                          | 0           |                |             |
| Bacteria.Proteobacteria.Deltaproteobacteria.Desulfovibrionales.Desulfovibrionaceae.Desulfovibrio            | 0           |                |             |
| Bacteria.Proteobacteria.Deltaproteobacteria.Desulfuromonadales                                              | 0           |                |             |
| Bacteria.Proteobacteria.Deltaproteobacteria.Desulfuromonadales.Geobacteraceae                               | 0           |                |             |
| Bacteria.Proteobacteria.Deltaproteobacteria.Desulfuromonadales.Geobacteraceae.Geobacter                     | 0           |                |             |
| Bacteria.Proteobacteria.Deltaproteobacteria.Myxococcales                                                    | 0           |                |             |
| Bacteria.Proteobacteria.Deltaproteobacteria.Myxococcales.Cystobacteraceae                                   | 0           |                |             |
| Bacteria.Proteobacteria.Deltaproteobacteria.Myxococcales.Cystobacteraceae.Cystobacter                       | 0           |                |             |
| Bacteria.Proteobacteria.Deltaproteobacteria.Myxococcales.Cystobacteraceae.unclassified_genus                | 0           |                |             |
| Bacteria.Proteobacteria.Deltaproteobacteria.Myxococcales.Nannocystaceae                                     | 0           |                |             |
| Bacteria.Proteobacteria.Deltaproteobacteria.Myxococcales.Nannocystaceae.Nannocystis                         | 0           |                |             |
| Bacteria.Proteobacteria.Deltaproteobacteria.Myxococcales.Polyangiaceae                                      | 0           |                |             |
| Bacteria.Proteobacteria.Deltaproteobacteria.Myxococcales.Polyangiaceae.Byssovorax                           | 0           |                |             |
| Bacteria.Proteobacteria.Deltaproteobacteria.Myxococcales.Polyangiaceae.unclassified_genus                   | 0           |                |             |
| Bacteria.Proteobacteria.Deltaproteobacteria.Myxococcales.unclassified_family                                | 0           |                |             |
| Bacteria.Proteobacteria.Deltaproteobacteria.Myxococcales.unclassified_family.unclassified_genus             | 0           |                |             |
| Bacteria.Proteobacteria.Deltaproteobacteria.unclassified_order                                              | 0           |                |             |
| Bacteria.Proteobacteria.Deltaproteobacteria.unclassified_order.unclassified_family                          | 0           |                |             |
| Bacteria.Proteobacteria.Deltaproteobacteria.unclassified_order.unclassified_family.unclassified_genus       | 0           |                |             |
| Bacteria.Proteobacteria.Epsilonproteobacteria                                                               | 3.924477168 |                |             |
| Bacteria.Proteobacteria.Epsilonproteobacteria.Campylobacteriales                                            | 3.924477168 |                |             |
| Bacteria.Proteobacteria.Epsilonproteobacteria.Campylobacteriales.Campylobacteraceae                         | 3.924477168 |                |             |
| Bacteria.Proteobacteria.Epsilonproteobacteria.Campylobacteriales.Campylobacteraceae.Arcobacter              | 3.924477168 |                |             |
| Bacteria.Proteobacteria.Epsilonproteobacteria.Campylobacteriales.Campylobacteraceae.Campylobacter           | 0           |                |             |
| Bacteria.Proteobacteria.Epsilonproteobacteria.Campylobacteriales.Campylobacteraceae.Sulfurospirillum        | 0           |                |             |
| Bacteria.Proteobacteria.Epsilonproteobacteria.Campylobacteriales.Helicobacteraceae                          | 0           |                |             |
| Bacteria.Proteobacteria.Epsilonproteobacteria.Campylobacteriales.Helicobacteraceae.Helicobacter             | 0           |                |             |
| Bacteria.Proteobacteria.Epsilonproteobacteria.unclassified_order                                            | 0           |                |             |
| Bacteria.Proteobacteria.Epsilonproteobacteria.unclassified_order.unclassified_family                        | 0           |                |             |
| Bacteria.Proteobacteria.Epsilonproteobacteria.unclassified_order.unclassified_family.unclassified_genus     | 0           |                |             |
| Bacteria.Proteobacteria.Gammaproteobacteria                                                                 | 5.323225683 |                |             |
| Bacteria.Proteobacteria.Gammaproteobacteria.Aeromonadales                                                   | 3.077274542 |                |             |
| Bacteria.Proteobacteria.Gammaproteobacteria.Aeromonadales.Aeromonadaceae                                    | 3.077274542 |                |             |
| Bacteria.Proteobacteria.Gammaproteobacteria.Aeromonadales.Aeromonadaceae.Aeromonas                          | 3.077274542 |                |             |
| Bacteria.Proteobacteria.Gammaproteobacteria.Aeromonadales.Aeromonadaceae.unclassified_genus                 | 0           |                |             |
| Bacteria.Proteobacteria.Gammaproteobacteria.Alteromonadales                                                 | 0           |                |             |
| Bacteria.Proteobacteria.Gammaproteobacteria.Alteromonadales.Shewanellaceae                                  | 0           |                |             |
| Bacteria.Proteobacteria.Gammaproteobacteria.Alteromonadales.Shewanellaceae.Shewanella                       | 0           |                |             |
| Bacteria.Proteobacteria.Gammaproteobacteria.Alteromonadales.unclassified_family                             | 0           |                |             |
| Bacteria.Proteobacteria.Gammaproteobacteria.Alteromonadales.unclassified_family.unclassified_genus          | 0           |                |             |
| Bacteria.Proteobacteria.Gammaproteobacteria.Chromatiales                                                    | 0           |                |             |
| Bacteria.Proteobacteria.Gammaproteobacteria.Chromatiales.Chromatiaceae                                      | 0           |                |             |
| Bacteria.Proteobacteria.Gammaproteobacteria.Chromatiales.Chromatiaceae.Rheinheimera                         | 0           |                |             |
| Bacteria.Proteobacteria.Gammaproteobacteria.Enterobacteriales                                               | 4.993318789 |                |             |
| Bacteria.Proteobacteria.Gammaproteobacteria.Enterobacteriales.Enterobacteriaceae                            | 4.993318789 |                |             |
| Bacteria.Proteobacteria.Gammaproteobacteria.Enterobacteriales.Enterobacteriaceae.Buttiauxella               | 0           |                |             |
| Bacteria.Proteobacteria.Gammaproteobacteria.Enterobacteriales.Enterobacteriaceae.Cedecea                    | 0           |                |             |
| Bacteria.Proteobacteria.Gammaproteobacteria.Enterobacteriales.Enterobacteriaceae.Citrobacter                | 4.609633879 |                |             |
| Bacteria.Proteobacteria.Gammaproteobacteria.Enterobacteriales.Enterobacteriaceae.Cronobacter                | 0           |                |             |
| Bacteria.Proteobacteria.Gammaproteobacteria.Enterobacteriales.Enterobacteriaceae.Enterobacter               | 0           |                |             |
| Bacteria.Proteobacteria.Gammaproteobacteria.Enterobacteriales.Enterobacteriaceae.Erwinia                    | 4.202141686 |                |             |
| Bacteria.Proteobacteria.Gammaproteobacteria.Enterobacteriales.Enterobacteriaceae.Escherichia_Shigella       | 3.976339777 |                |             |
| Bacteria.Proteobacteria.Gammaproteobacteria.Enterobacteriales.Enterobacteriaceae.Klebsiella                 | 3.774512957 |                |             |
| Bacteria.Proteobacteria.Gammaproteobacteria.Enterobacteriales.Enterobacteriaceae.Kluyvera                   | 0           |                |             |
| Bacteria.Proteobacteria.Gammaproteobacteria.Enterobacteriales.Enterobacteriaceae.Morganella                 | 0           |                |             |
| Bacteria.Proteobacteria.Gammaproteobacteria.Enterobacteriales.Enterobacteriaceae.Pantoea                    | 4.292341436 |                |             |
| Bacteria.Proteobacteria.Gammaproteobacteria.Enterobacteriales.Enterobacteriaceae.Raoultella                 | 0           |                |             |
| Bacteria.Proteobacteria.Gammaproteobacteria.Enterobacteriales.Enterobacteriaceae.Serratia                   | 3.570295382 |                |             |
| Bacteria.Proteobacteria.Gammaproteobacteria.Enterobacteriales.Enterobacteriaceae.Trabulsilla                | 0           |                |             |
| Bacteria.Proteobacteria.Gammaproteobacteria.Enterobacteriales.Enterobacteriaceae.unclassified_genus         | 4.04473148  | Fishmeal-based | 3.199156382 |
| Bacteria.Proteobacteria.Gammaproteobacteria.Enterobacteriales.Enterobacteriaceae.Yersinia                   | 0           |                |             |
| Bacteria.Proteobacteria.Gammaproteobacteria.Gammaproteobacteria_incertae_sedis                              | 3.077274542 |                |             |
| Bacteria.Proteobacteria.Gammaproteobacteria.Gammaproteobacteria_incertae_sedis.Solimonas                    | 3.077274542 |                |             |
| Bacteria.Proteobacteria.Gammaproteobacteria.Gammaproteobacteria_incertae_sedis.Solimonas.unclassified_genus | 3.077274542 |                |             |
| Bacteria.Proteobacteria.Gammaproteobacteria.Legionellales                                                   | 0           |                |             |
| Bacteria.Proteobacteria.Gammaproteobacteria.Legionellales.Coxiellaceae                                      | 0           |                |             |
| Bacteria.Proteobacteria.Gammaproteobacteria.Legionellales.Coxiellaceae.Aquicella                            | 0           |                |             |
| Bacteria.Proteobacteria.Gammaproteobacteria.Legionellales.Legionellaceae                                    | 0           |                |             |
| Bacteria.Proteobacteria.Gammaproteobacteria.Legionellales.Legionellaceae.Legionella                         | 0           |                |             |
| Bacteria.Proteobacteria.Gammaproteobacteria.Legionellales.Legionellaceae.unclassified_genus                 | 0           |                |             |
| Bacteria.Proteobacteria.Gammaproteobacteria.Oceanospirillales                                               | 0           |                |             |
| Bacteria.Proteobacteria.Gammaproteobacteria.Oceanospirillales.Halomonadaceae                                | 0           |                |             |
| Bacteria.Proteobacteria.Gammaproteobacteria.Oceanospirillales.Halomonadaceae.Halomonas                      | 0           |                |             |
| Bacteria.Proteobacteria.Gammaproteobacteria.Pasteurellales                                                  | 0           |                |             |
| Bacteria.Proteobacteria.Gammaproteobacteria.Pasteurellales.Pasteurellaceae                                  | 0           |                |             |
| Bacteria.Proteobacteria.Gammaproteobacteria.Pasteurellales.Pasteurellaceae.Actinobacillus                   | 0           |                |             |
| Bacteria.Proteobacteria.Gammaproteobacteria.Pasteurellales.Pasteurellaceae.Aggregatibacter                  | 0           |                |             |
| Bacteria.Proteobacteria.Gammaproteobacteria.Pasteurellales.Pasteurellaceae.Haemophilus                      | 0           |                |             |
| Bacteria.Proteobacteria.Gammaproteobacteria.Pasteurellales.Pasteurellaceae.Pasteurella                      | 0           |                |             |
| Bacteria.Proteobacteria.Gammaproteobacteria.Pasteurellales.Pasteurellaceae.unclassified_genus               | 0           |                |             |
| Bacteria.Proteobacteria.Gammaproteobacteria.Pseudomonadales                                                 | 5.044511647 |                |             |
| Bacteria.Proteobacteria.Gammaproteobacteria.Pseudomonadales.Moraxellaceae                                   | 4.86324788  |                |             |
| Bacteria.Proteobacteria.Gammaproteobacteria.Pseudomonadales.Moraxellaceae.Acinetobacter                     | 4.749876532 |                |             |
| Bacteria.Proteobacteria.Gammaproteobacteria.Pseudomonadales.Moraxellaceae.Alkanindiges                      | 0           |                |             |
| Bacteria.Proteobacteria.Gammaproteobacteria.Pseudomonadales.Moraxellaceae.Enhydrobacter                     | 3.981631143 |                |             |
| Bacteria.Proteobacteria.Gammaproteobacteria.Pseudomonadales.Moraxellaceae.Moraxella                         | 0           |                |             |
| Bacteria.Proteobacteria.Gammaproteobacteria.Pseudomonadales.Moraxellaceae.Perlicudioba                      | 0           |                |             |
| Bacteria.Proteobacteria.Gammaproteobacteria.Pseudomonadales.Moraxellaceae.Psychrobacter                     | 0           |                |             |
| Bacteria.Proteobacteria.Gammaproteobacteria.Pseudomonadales.Moraxellaceae.unclassified_genus                | 3.868905904 |                |             |
| Bacteria.Proteobacteria.Gammaproteobacteria.Pseudomonadales.Pseudomonadaceae                                | 4.644897136 |                |             |
| Bacteria.Proteobacteria.Gammaproteobacteria.Pseudomonadales.Pseudomonadaceae.Azorhizophilus                 | 0           |                |             |

|                                                                                                                     |             |                |             |
|---------------------------------------------------------------------------------------------------------------------|-------------|----------------|-------------|
| Bacteria.Proteobacteria.Gammaproteobacteria.Pseudomonadales.Pseudomonadaceae.CeIlvibrio                             | 0           |                |             |
| Bacteria.Proteobacteria.Gammaproteobacteria.Pseudomonadales.Pseudomonadaceae.Pseudomonas                            | 4.60713385  |                |             |
| Bacteria.Proteobacteria.Gammaproteobacteria.Pseudomonadales.Pseudomonadaceae.unclassified_genus                     | 3.56544288  |                |             |
| Bacteria.Proteobacteria.Gammaproteobacteria.Pseudomonadales.unclassified_family                                     | 0           |                |             |
| Bacteria.Proteobacteria.Gammaproteobacteria.Pseudomonadales.unclassified_family.unclassified_genus                  | 0           |                |             |
| Bacteria.Proteobacteria.Gammaproteobacteria.Salinisphaerales                                                        | 0           |                |             |
| Bacteria.Proteobacteria.Gammaproteobacteria.Salinisphaerales.Salinisphaeraeae                                       | 0           |                |             |
| Bacteria.Proteobacteria.Gammaproteobacteria.Salinisphaerales.Salinisphaeraeae.Salinisphaera                         | 0           |                |             |
| Bacteria.Proteobacteria.Gammaproteobacteria.unclassified_order                                                      | 0           |                |             |
| Bacteria.Proteobacteria.Gammaproteobacteria.unclassified_order.unclassified_family                                  | 0           |                |             |
| Bacteria.Proteobacteria.Gammaproteobacteria.unclassified_order.unclassified_family.unclassified_genus               | 0           |                |             |
| Bacteria.Proteobacteria.Gammaproteobacteria.Vibrionales                                                             | 0           |                |             |
| Bacteria.Proteobacteria.Gammaproteobacteria.Vibrionales.Vibrionaceae                                                | 0           |                |             |
| Bacteria.Proteobacteria.Gammaproteobacteria.Vibrionales.Vibrionaceae.Photobacterium                                 | 0           |                |             |
| Bacteria.Proteobacteria.Gammaproteobacteria.Vibrionales.Vibrionaceae.unclassified_genus                             | 0           |                |             |
| Bacteria.Proteobacteria.Gammaproteobacteria.Vibrionales.Vibrionaceae.Vibrio                                         | 0           |                |             |
| Bacteria.Proteobacteria.Gammaproteobacteria.Xanthomonadales                                                         | 3.086716098 |                |             |
| Bacteria.Proteobacteria.Gammaproteobacteria.Xanthomonadales.Sinobacteraceae                                         | 0           |                |             |
| Bacteria.Proteobacteria.Gammaproteobacteria.Xanthomonadales.Sinobacteraceae.Steroidobacter                          | 0           |                |             |
| Bacteria.Proteobacteria.Gammaproteobacteria.Xanthomonadales.Xanthomonadaceae                                        | 3.086716098 |                |             |
| Bacteria.Proteobacteria.Gammaproteobacteria.Xanthomonadales.Xanthomonadaceae.Lysobacter                             | 0           |                |             |
| Bacteria.Proteobacteria.Gammaproteobacteria.Xanthomonadales.Xanthomonadaceae.Pseudoxanthomonas                      | 0           |                |             |
| Bacteria.Proteobacteria.Gammaproteobacteria.Xanthomonadales.Xanthomonadaceae.Stenotrophomonas                       | 3.086716098 |                |             |
| Bacteria.Proteobacteria.Gammaproteobacteria.Xanthomonadales.Xanthomonadaceae.unclassified_genus                     | 0           |                |             |
| Bacteria.Proteobacteria.Gammaproteobacteria.Xanthomonadales.Xanthomonadaceae.Wohlfahrtiimonas                       | 0           |                |             |
| Bacteria.Proteobacteria.Gammaproteobacteria.Xanthomonadales.Xanthomonadaceae.Xanthomonas                            | 0           |                |             |
| Bacteria.Proteobacteria.unclassified_class                                                                          | 0           |                |             |
| Bacteria.Proteobacteria.unclassified_class.unclassified_order                                                       | 0           |                |             |
| Bacteria.Proteobacteria.unclassified_class.unclassified_order.unclassified_family                                   | 0           |                |             |
| Bacteria.Proteobacteria.unclassified_class.unclassified_order.unclassified_family.unclassified_genus                | 0           |                |             |
| Bacteria.Spirochaetes                                                                                               | 0           |                |             |
| Bacteria.Spirochaetes.Spirochaetes                                                                                  | 0           |                |             |
| Bacteria.Spirochaetes.Spirochaetes.Spirochaetales                                                                   | 0           |                |             |
| Bacteria.Spirochaetes.Spirochaetes.Spirochaetales.Spirochaetaceae                                                   | 0           |                |             |
| Bacteria.Spirochaetes.Spirochaetes.Spirochaetales.Spirochaetaceae.Treponema                                         | 0           |                |             |
| Bacteria.SR1                                                                                                        | 0           |                |             |
| Bacteria.SR1.SR1 genera incertae sedis                                                                              | 0           |                |             |
| Bacteria.SR1.SR1 genera incertae sedis.unclassified_order                                                           | 0           |                |             |
| Bacteria.SR1.SR1 genera incertae sedis.unclassified_order.unclassified_family                                       | 0           |                |             |
| Bacteria.SR1.SR1 genera incertae sedis.unclassified_order.unclassified_family.unclassified_genus                    | 0           |                |             |
| Bacteria.Synergistetes                                                                                              | 0           |                |             |
| Bacteria.Synergistetes.Synergistia                                                                                  | 0           |                |             |
| Bacteria.Synergistetes.Synergistia.Synergistales                                                                    | 0           |                |             |
| Bacteria.Synergistetes.Synergistia.Synergistales.Synergistaceae                                                     | 0           |                |             |
| Bacteria.Synergistetes.Synergistia.Synergistales.Synergistaceae.unclassified_genus                                  | 0           |                |             |
| Bacteria.Tenericutes                                                                                                | 0           |                |             |
| Bacteria.Tenericutes.Mollicutes                                                                                     | 0           |                |             |
| Bacteria.Tenericutes.Mollicutes.Anaeroplasmatales                                                                   | 0           |                |             |
| Bacteria.Tenericutes.Mollicutes.Anaeroplasmatales.Anaeroplasmataceae                                                | 0           |                |             |
| Bacteria.Tenericutes.Mollicutes.Anaeroplasmatales.Anaeroplasmataceae.Anaeroplasma                                   | 0           |                |             |
| Bacteria.Tenericutes.Mollicutes.Mycoplasmatales                                                                     | 0           |                |             |
| Bacteria.Tenericutes.Mollicutes.Mycoplasmatales.Mycoplasmataceae                                                    | 0           |                |             |
| Bacteria.Tenericutes.Mollicutes.Mycoplasmatales.Mycoplasmataceae.Mycoplasma                                         | 0           |                |             |
| Bacteria.TM7                                                                                                        | 0           |                |             |
| Bacteria.TM7.TM7 genera incertae sedis                                                                              | 0           |                |             |
| Bacteria.TM7.TM7 genera incertae sedis.unclassified_order                                                           | 0           |                |             |
| Bacteria.TM7.TM7 genera incertae sedis.unclassified_order.unclassified_family                                       | 0           |                |             |
| Bacteria.TM7.TM7 genera incertae sedis.unclassified_order.unclassified_family.unclassified_genus                    | 0           |                |             |
| Bacteria.unclassified_phylum                                                                                        | 4.293861782 | Fishmeal-based | 3.677331359 |
| Bacteria.unclassified_phylum.unclassified_class                                                                     | 4.293861782 | Fishmeal-based | 3.677331359 |
| Bacteria.unclassified_phylum.unclassified_class.unclassified_order                                                  | 4.293861782 | Fishmeal-based | 3.677331359 |
| Bacteria.unclassified_phylum.unclassified_class.unclassified_order.unclassified_family                              | 4.293861782 | Fishmeal-based | 3.677331359 |
| Bacteria.unclassified_phylum.unclassified_class.unclassified_order.unclassified_family.unclassified_genus           | 4.293861782 | Fishmeal-based | 3.677331359 |
| Bacteria.Verrucomicrobia                                                                                            | 0           |                |             |
| Bacteria.Verrucomicrobia.Opitutae                                                                                   | 0           |                |             |
| Bacteria.Verrucomicrobia.Opitutae.Opitutales                                                                        | 0           |                |             |
| Bacteria.Verrucomicrobia.Opitutae.Opitutales.Opitutaceae                                                            | 0           |                |             |
| Bacteria.Verrucomicrobia.Opitutae.Opitutales.Opitutaceae.Opitutus                                                   | 0           |                |             |
| Bacteria.Verrucomicrobia.Spartobacteria                                                                             | 0           |                |             |
| Bacteria.Verrucomicrobia.Spartobacteria.Spartobacteria genera incertae sedis                                        | 0           |                |             |
| Bacteria.Verrucomicrobia.Spartobacteria.Spartobacteria genera incertae sedis.unclassified_family                    | 0           |                |             |
| Bacteria.Verrucomicrobia.Spartobacteria.Spartobacteria genera incertae sedis.unclassified_family.unclassified_genus | 0           |                |             |
| Bacteria.Verrucomicrobia.unclassified_class                                                                         | 0           |                |             |
| Bacteria.Verrucomicrobia.unclassified_class.unclassified_order                                                      | 0           |                |             |
| Bacteria.Verrucomicrobia.unclassified_class.unclassified_order.unclassified_family                                  | 0           |                |             |
| Bacteria.Verrucomicrobia.unclassified_class.unclassified_order.unclassified_family.unclassified_genus               | 0           |                |             |
| Bacteria.Verrucomicrobia.Verrucomicrobiae                                                                           | 0           |                |             |
| Bacteria.Verrucomicrobia.Verrucomicrobiae.Verrucomicrobiales                                                        | 0           |                |             |
| Bacteria.Verrucomicrobia.Verrucomicrobiae.Verrucomicrobiales.Verrucomicrobiaceae                                    | 0           |                |             |
| Bacteria.Verrucomicrobia.Verrucomicrobiae.Verrucomicrobiales.Verrucomicrobiaceae.Akkermansia                        | 0           |                |             |

Footnotes:

1. Taxonomic assignment determined using RDP classifier to compare a representative sequence from each OTU to reference sequences in the greengenes database.

Table S18. LEfSe comparison of fishmeal-based, high density against fishmeal-based, low density

| Taxon <sup>1</sup>                                                                                     | Log10 [(mean relative abundance) x (10 <sup>6</sup> )] from group with higher relative abundance of taxon | Group with significantly higher logarithmic LDA score | Logarithmic LDA score of higher-scoring group |
|--------------------------------------------------------------------------------------------------------|-----------------------------------------------------------------------------------------------------------|-------------------------------------------------------|-----------------------------------------------|
| Bacteria                                                                                               | 6                                                                                                         |                                                       |                                               |
| Bacteria.Acidobacteria                                                                                 | 0                                                                                                         |                                                       |                                               |
| Bacteria.Acidobacteria.Acidobacteria Gp1                                                               | 0                                                                                                         |                                                       |                                               |
| Bacteria.Acidobacteria.Acidobacteria Gp1.Gp1                                                           | 0                                                                                                         |                                                       |                                               |
| Bacteria.Acidobacteria.Acidobacteria Gp1.Gp1.unclassified family                                       | 0                                                                                                         |                                                       |                                               |
| Bacteria.Acidobacteria.Acidobacteria Gp1.Gp1.unclassified family.unclassified genus                    | 0                                                                                                         |                                                       |                                               |
| Bacteria.Acidobacteria.Acidobacteria Gp16                                                              | 0                                                                                                         |                                                       |                                               |
| Bacteria.Acidobacteria.Acidobacteria Gp16.Gp16                                                         | 0                                                                                                         |                                                       |                                               |
| Bacteria.Acidobacteria.Acidobacteria Gp16.Gp16.unclassified family                                     | 0                                                                                                         |                                                       |                                               |
| Bacteria.Acidobacteria.Acidobacteria Gp16.Gp16.unclassified family.unclassified genus                  | 0                                                                                                         |                                                       |                                               |
| Bacteria.Acidobacteria.Acidobacteria Gp2                                                               | 0                                                                                                         |                                                       |                                               |
| Bacteria.Acidobacteria.Acidobacteria Gp2.Gp2                                                           | 0                                                                                                         |                                                       |                                               |
| Bacteria.Acidobacteria.Acidobacteria Gp2.Gp2.unclassified family                                       | 0                                                                                                         |                                                       |                                               |
| Bacteria.Acidobacteria.Acidobacteria Gp2.Gp2.unclassified family.unclassified genus                    | 0                                                                                                         |                                                       |                                               |
| Bacteria.Acidobacteria.Acidobacteria Gp3                                                               | 0                                                                                                         |                                                       |                                               |
| Bacteria.Acidobacteria.Acidobacteria Gp3.Gp3                                                           | 0                                                                                                         |                                                       |                                               |
| Bacteria.Acidobacteria.Acidobacteria Gp3.Gp3.unclassified family                                       | 0                                                                                                         |                                                       |                                               |
| Bacteria.Acidobacteria.Acidobacteria Gp3.Gp3.unclassified family.unclassified genus                    | 0                                                                                                         |                                                       |                                               |
| Bacteria.Acidobacteria.Acidobacteria Gp4                                                               | 0                                                                                                         |                                                       |                                               |
| Bacteria.Acidobacteria.Acidobacteria Gp4.Gp4                                                           | 0                                                                                                         |                                                       |                                               |
| Bacteria.Acidobacteria.Acidobacteria Gp4.Gp4.unclassified family                                       | 0                                                                                                         |                                                       |                                               |
| Bacteria.Acidobacteria.Acidobacteria Gp4.Gp4.unclassified family.unclassified genus                    | 0                                                                                                         |                                                       |                                               |
| Bacteria.Acidobacteria.Acidobacteria Gp5                                                               | 0                                                                                                         |                                                       |                                               |
| Bacteria.Acidobacteria.Acidobacteria Gp5.Gp5                                                           | 0                                                                                                         |                                                       |                                               |
| Bacteria.Acidobacteria.Acidobacteria Gp5.Gp5.unclassified family                                       | 0                                                                                                         |                                                       |                                               |
| Bacteria.Acidobacteria.Acidobacteria Gp5.Gp5.unclassified family.unclassified genus                    | 0                                                                                                         |                                                       |                                               |
| Bacteria.Acidobacteria.Acidobacteria Gp6                                                               | 0                                                                                                         |                                                       |                                               |
| Bacteria.Acidobacteria.Acidobacteria Gp6.Gp6                                                           | 0                                                                                                         |                                                       |                                               |
| Bacteria.Acidobacteria.Acidobacteria Gp6.Gp6.unclassified family                                       | 0                                                                                                         |                                                       |                                               |
| Bacteria.Acidobacteria.Acidobacteria Gp6.Gp6.unclassified family.unclassified genus                    | 0                                                                                                         |                                                       |                                               |
| Bacteria.Acidobacteria.Acidobacteria Gp7                                                               | 0                                                                                                         |                                                       |                                               |
| Bacteria.Acidobacteria.Acidobacteria Gp7.Gp7                                                           | 0                                                                                                         |                                                       |                                               |
| Bacteria.Acidobacteria.Acidobacteria Gp7.Gp7.unclassified family                                       | 0                                                                                                         |                                                       |                                               |
| Bacteria.Acidobacteria.Acidobacteria Gp7.Gp7.unclassified family.unclassified genus                    | 0                                                                                                         |                                                       |                                               |
| Bacteria.Actinobacteria                                                                                | 3.387746094                                                                                               |                                                       |                                               |
| Bacteria.Actinobacteria.Actinobacteria                                                                 | 3.387746094                                                                                               |                                                       |                                               |
| Bacteria.Actinobacteria.Actinobacteria.Acidimicrobiales                                                | 0                                                                                                         |                                                       |                                               |
| Bacteria.Actinobacteria.Actinobacteria.Acidimicrobiales.Acidimicrobiaceae                              | 0                                                                                                         |                                                       |                                               |
| Bacteria.Actinobacteria.Actinobacteria.Acidimicrobiales.Acidimicrobiaceae.unclassified genus           | 0                                                                                                         |                                                       |                                               |
| Bacteria.Actinobacteria.Actinobacteria.Acidimicrobiales.lamiaceae                                      | 0                                                                                                         |                                                       |                                               |
| Bacteria.Actinobacteria.Actinobacteria.Acidimicrobiales.lamiaceae.lamia                                | 0                                                                                                         |                                                       |                                               |
| Bacteria.Actinobacteria.Actinobacteria.Acidimicrobiales.Acidimicrobiidae incertae sedis                | 0                                                                                                         |                                                       |                                               |
| Bacteria.Actinobacteria.Actinobacteria.Acidimicrobiidae incertae sedis.lumatobacter                    | 0                                                                                                         |                                                       |                                               |
| Bacteria.Actinobacteria.Actinobacteria.Acidimicrobiidae incertae sedis.lumatobacter.unclassified genus | 0                                                                                                         |                                                       |                                               |
| Bacteria.Actinobacteria.Actinobacteria.Actinomycetales                                                 | 3.387746094                                                                                               |                                                       |                                               |
| Bacteria.Actinobacteria.Actinobacteria.Actinomycetales.Actinomycetaceae                                | 0                                                                                                         |                                                       |                                               |
| Bacteria.Actinobacteria.Actinobacteria.Actinomycetales.Actinomycetaceae.Actinomycetes                  | 0                                                                                                         |                                                       |                                               |
| Bacteria.Actinobacteria.Actinobacteria.Actinomycetales.Actinomycetaceae.Arcanobacterium                | 0                                                                                                         |                                                       |                                               |
| Bacteria.Actinobacteria.Actinobacteria.Actinomycetales.Actinomycetaceae.unclassified genus             | 0                                                                                                         |                                                       |                                               |
| Bacteria.Actinobacteria.Actinobacteria.Actinomycetales.Beutenbergiaceae                                | 0                                                                                                         |                                                       |                                               |
| Bacteria.Actinobacteria.Actinobacteria.Actinomycetales.Beutenbergiaceae.Salana                         | 0                                                                                                         |                                                       |                                               |
| Bacteria.Actinobacteria.Actinobacteria.Actinomycetales.Beutenbergiaceae.Serinibacter                   | 0                                                                                                         |                                                       |                                               |
| Bacteria.Actinobacteria.Actinobacteria.Actinomycetales.Bogoriellaceae                                  | 0                                                                                                         |                                                       |                                               |
| Bacteria.Actinobacteria.Actinobacteria.Actinomycetales.Bogoriellaceae.Georgia                          | 0                                                                                                         |                                                       |                                               |
| Bacteria.Actinobacteria.Actinobacteria.Actinomycetales.Bogoriellaceae.unclassified genus               | 0                                                                                                         |                                                       |                                               |
| Bacteria.Actinobacteria.Actinobacteria.Actinomycetales.Brevibacteriaceae                               | 0                                                                                                         |                                                       |                                               |
| Bacteria.Actinobacteria.Actinobacteria.Actinomycetales.Brevibacteriaceae.Brevibacterium                | 0                                                                                                         |                                                       |                                               |
| Bacteria.Actinobacteria.Actinobacteria.Actinomycetales.Cellulomonadaceae                               | 0                                                                                                         |                                                       |                                               |
| Bacteria.Actinobacteria.Actinobacteria.Actinomycetales.Cellulomonadaceae.Cellulomonas                  | 0                                                                                                         |                                                       |                                               |
| Bacteria.Actinobacteria.Actinobacteria.Actinomycetales.Cellulomonadaceae.unclassified genus            | 0                                                                                                         |                                                       |                                               |
| Bacteria.Actinobacteria.Actinobacteria.Actinomycetales.Corynebacteriaceae                              | 0                                                                                                         |                                                       |                                               |
| Bacteria.Actinobacteria.Actinobacteria.Actinomycetales.Corynebacteriaceae.Corynebacterium              | 0                                                                                                         |                                                       |                                               |
| Bacteria.Actinobacteria.Actinobacteria.Actinomycetales.Corynebacteriaceae.Turicella                    | 0                                                                                                         |                                                       |                                               |
| Bacteria.Actinobacteria.Actinobacteria.Actinomycetales.Corynebacteriaceae.unclassified genus           | 0                                                                                                         |                                                       |                                               |
| Bacteria.Actinobacteria.Actinobacteria.Actinomycetales.Dermabacteraceae                                | 0                                                                                                         |                                                       |                                               |
| Bacteria.Actinobacteria.Actinobacteria.Actinomycetales.Dermabacteraceae.Brachybacterium                | 0                                                                                                         |                                                       |                                               |
| Bacteria.Actinobacteria.Actinobacteria.Actinomycetales.Dermacoccaceae                                  | 0                                                                                                         |                                                       |                                               |
| Bacteria.Actinobacteria.Actinobacteria.Actinomycetales.Dermacoccaceae.Dermacoccus                      | 0                                                                                                         |                                                       |                                               |
| Bacteria.Actinobacteria.Actinobacteria.Actinomycetales.Dietziaceae                                     | 0                                                                                                         |                                                       |                                               |
| Bacteria.Actinobacteria.Actinobacteria.Actinomycetales.Dietziaceae.Dietzia                             | 0                                                                                                         |                                                       |                                               |
| Bacteria.Actinobacteria.Actinobacteria.Actinomycetales.Geodermatophilaceae                             | 0                                                                                                         |                                                       |                                               |
| Bacteria.Actinobacteria.Actinobacteria.Actinomycetales.Geodermatophilaceae.Blastococcus                | 0                                                                                                         |                                                       |                                               |
| Bacteria.Actinobacteria.Actinobacteria.Actinomycetales.Geodermatophilaceae.unclassified genus          | 0                                                                                                         |                                                       |                                               |
| Bacteria.Actinobacteria.Actinobacteria.Actinomycetales.Intrasporangiaceae                              | 0                                                                                                         |                                                       |                                               |
| Bacteria.Actinobacteria.Actinobacteria.Actinomycetales.Intrasporangiaceae.Janibacter                   | 0                                                                                                         |                                                       |                                               |
| Bacteria.Actinobacteria.Actinobacteria.Actinomycetales.Intrasporangiaceae.Knoellia                     | 0                                                                                                         |                                                       |                                               |
| Bacteria.Actinobacteria.Actinobacteria.Actinomycetales.Intrasporangiaceae.Ornithinimicrobium           | 0                                                                                                         |                                                       |                                               |
| Bacteria.Actinobacteria.Actinobacteria.Actinomycetales.Intrasporangiaceae.Tetrasphaera                 | 0                                                                                                         |                                                       |                                               |
| Bacteria.Actinobacteria.Actinobacteria.Actinomycetales.Intrasporangiaceae.unclassified genus           | 0                                                                                                         |                                                       |                                               |
| Bacteria.Actinobacteria.Actinobacteria.Actinomycetales.Jonesiaceae                                     | 0                                                                                                         |                                                       |                                               |
| Bacteria.Actinobacteria.Actinobacteria.Actinomycetales.Jonesiaceae.Jonesia                             | 0                                                                                                         |                                                       |                                               |
| Bacteria.Actinobacteria.Actinobacteria.Actinomycetales.Microbacteriaceae                               | 0                                                                                                         |                                                       |                                               |
| Bacteria.Actinobacteria.Actinobacteria.Actinomycetales.Microbacteriaceae.Agrococcus                    | 0                                                                                                         |                                                       |                                               |
| Bacteria.Actinobacteria.Actinobacteria.Actinomycetales.Microbacteriaceae.Clavibacter                   | 0                                                                                                         |                                                       |                                               |
| Bacteria.Actinobacteria.Actinobacteria.Actinomycetales.Microbacteriaceae.Curtobacterium                | 0                                                                                                         |                                                       |                                               |
| Bacteria.Actinobacteria.Actinobacteria.Actinomycetales.Microbacteriaceae.Frigoribacterium              | 0                                                                                                         |                                                       |                                               |
| Bacteria.Actinobacteria.Actinobacteria.Actinomycetales.Microbacteriaceae.Leifsonia                     | 0                                                                                                         |                                                       |                                               |
| Bacteria.Actinobacteria.Actinobacteria.Actinomycetales.Microbacteriaceae.Leucobacter                   | 0                                                                                                         |                                                       |                                               |
| Bacteria.Actinobacteria.Actinobacteria.Actinomycetales.Microbacteriaceae.Microbacterium                | 0                                                                                                         |                                                       |                                               |
| Bacteria.Actinobacteria.Actinobacteria.Actinomycetales.Microbacteriaceae.Plantibacter                  | 0                                                                                                         |                                                       |                                               |
| Bacteria.Actinobacteria.Actinobacteria.Actinomycetales.Microbacteriaceae.Pseudoclavibacter             | 0                                                                                                         |                                                       |                                               |
| Bacteria.Actinobacteria.Actinobacteria.Actinomycetales.Microbacteriaceae.unclassified genus            | 0                                                                                                         |                                                       |                                               |

|                                                                                                    |             |  |  |
|----------------------------------------------------------------------------------------------------|-------------|--|--|
| Bacteria.Actinobacteria.Actinobacteria.Actinomycetales.Micrococcaceae                              | 3.387746094 |  |  |
| Bacteria.Actinobacteria.Actinobacteria.Actinomycetales.Micrococcaceae.Arthrobacter                 | 3.387746094 |  |  |
| Bacteria.Actinobacteria.Actinobacteria.Actinomycetales.Micrococcaceae.Kocuria                      | 0           |  |  |
| Bacteria.Actinobacteria.Actinobacteria.Actinomycetales.Micrococcaceae.Micrococcus                  | 0           |  |  |
| Bacteria.Actinobacteria.Actinobacteria.Actinomycetales.Micrococcaceae.Nesterenkonia                | 0           |  |  |
| Bacteria.Actinobacteria.Actinobacteria.Actinomycetales.Micrococcaceae.Rothia                       | 0           |  |  |
| Bacteria.Actinobacteria.Actinobacteria.Actinomycetales.Micrococcaceae.unclassified_genus           | 0           |  |  |
| Bacteria.Actinobacteria.Actinobacteria.Actinomycetales.Micromonosporaceae                          | 0           |  |  |
| Bacteria.Actinobacteria.Actinobacteria.Actinomycetales.Micromonosporaceae.Luedemannella            | 0           |  |  |
| Bacteria.Actinobacteria.Actinobacteria.Actinomycetales.Micromonosporaceae.Micromonospora           | 0           |  |  |
| Bacteria.Actinobacteria.Actinobacteria.Actinomycetales.Mycobacteriaceae                            | 0           |  |  |
| Bacteria.Actinobacteria.Actinobacteria.Actinomycetales.Mycobacteriaceae.Mycobacterium              | 0           |  |  |
| Bacteria.Actinobacteria.Actinobacteria.Actinomycetales.Nocardiaceae                                | 0           |  |  |
| Bacteria.Actinobacteria.Actinobacteria.Actinomycetales.Nocardiaceae.Gordonia                       | 0           |  |  |
| Bacteria.Actinobacteria.Actinobacteria.Actinomycetales.Nocardiaceae.Rhodococcus                    | 0           |  |  |
| Bacteria.Actinobacteria.Actinobacteria.Actinomycetales.Nocardiaceae.unclassified_genus             | 0           |  |  |
| Bacteria.Actinobacteria.Actinobacteria.Actinomycetales.Nocardiaceae.Williamsia                     | 0           |  |  |
| Bacteria.Actinobacteria.Actinobacteria.Actinomycetales.Nocardioidaceae                             | 0           |  |  |
| Bacteria.Actinobacteria.Actinobacteria.Actinomycetales.Nocardioidaceae.Aeromicrobium               | 0           |  |  |
| Bacteria.Actinobacteria.Actinobacteria.Actinomycetales.Nocardioidaceae.Marmoricola                 | 0           |  |  |
| Bacteria.Actinobacteria.Actinobacteria.Actinomycetales.Nocardioidaceae.Nocardioides                | 0           |  |  |
| Bacteria.Actinobacteria.Actinobacteria.Actinomycetales.Nocardioidaceae.Pimelobacter                | 0           |  |  |
| Bacteria.Actinobacteria.Actinobacteria.Actinomycetales.Nocardioidaceae.unclassified_genus          | 0           |  |  |
| Bacteria.Actinobacteria.Actinobacteria.Actinomycetales.Nocardiopsaceae                             | 0           |  |  |
| Bacteria.Actinobacteria.Actinobacteria.Actinomycetales.Nocardiopsaceae.Nocardiopsis                | 0           |  |  |
| Bacteria.Actinobacteria.Actinobacteria.Actinomycetales.Nocardiopsaceae.unclassified_genus          | 0           |  |  |
| Bacteria.Actinobacteria.Actinobacteria.Actinomycetales.Propionibacteriaceae                        | 0           |  |  |
| Bacteria.Actinobacteria.Actinobacteria.Actinomycetales.Propionibacteriaceae.Friedmanniella         | 0           |  |  |
| Bacteria.Actinobacteria.Actinobacteria.Actinomycetales.Propionibacteriaceae.Microlunatus           | 0           |  |  |
| Bacteria.Actinobacteria.Actinobacteria.Actinomycetales.Propionibacteriaceae.Propionibacterium      | 0           |  |  |
| Bacteria.Actinobacteria.Actinobacteria.Actinomycetales.Propionibacteriaceae.unclassified_genus     | 0           |  |  |
| Bacteria.Actinobacteria.Actinobacteria.Actinomycetales.Pseudonocardiaceae                          | 0           |  |  |
| Bacteria.Actinobacteria.Actinobacteria.Actinomycetales.Pseudonocardiaceae.Pseudonocardia           | 0           |  |  |
| Bacteria.Actinobacteria.Actinobacteria.Actinomycetales.Pseudonocardiaceae.Saccharopolyspora        | 0           |  |  |
| Bacteria.Actinobacteria.Actinobacteria.Actinomycetales.Pseudonocardiaceae.unclassified_genus       | 0           |  |  |
| Bacteria.Actinobacteria.Actinobacteria.Actinomycetales.Sanguibacteraceae                           | 0           |  |  |
| Bacteria.Actinobacteria.Actinobacteria.Actinomycetales.Sanguibacteraceae.Sanguibacter              | 0           |  |  |
| Bacteria.Actinobacteria.Actinobacteria.Actinomycetales.Streptomycetaceae                           | 0           |  |  |
| Bacteria.Actinobacteria.Actinobacteria.Actinomycetales.Streptomycetaceae.Streptomyces              | 0           |  |  |
| Bacteria.Actinobacteria.Actinobacteria.Actinomycetales.Streptomycetaceae.unclassified_genus        | 0           |  |  |
| Bacteria.Actinobacteria.Actinobacteria.Actinomycetales.unclassified_family                         | 0           |  |  |
| Bacteria.Actinobacteria.Actinobacteria.Actinomycetales.unclassified_family.unclassified_genus      | 0           |  |  |
| Bacteria.Actinobacteria.Actinobacteria.Actinomycetales.Yaniellaceae                                | 0           |  |  |
| Bacteria.Actinobacteria.Actinobacteria.Actinomycetales.Yaniellaceae.Yaniella                       | 0           |  |  |
| Bacteria.Actinobacteria.Actinobacteria.Bifidobacteriales                                           | 0           |  |  |
| Bacteria.Actinobacteria.Actinobacteria.Bifidobacteriales.Bifidobacteriaceae                        | 0           |  |  |
| Bacteria.Actinobacteria.Actinobacteria.Bifidobacteriales.Bifidobacteriaceae.Aeriscardovia          | 0           |  |  |
| Bacteria.Actinobacteria.Actinobacteria.Bifidobacteriales.Bifidobacteriaceae.Bifidobacterium        | 0           |  |  |
| Bacteria.Actinobacteria.Actinobacteria.Bifidobacteriales.Bifidobacteriaceae.unclassified_genus     | 0           |  |  |
| Bacteria.Actinobacteria.Actinobacteria.Coriobacteriales                                            | 0           |  |  |
| Bacteria.Actinobacteria.Actinobacteria.Coriobacteriales.Coriobacteriaceae                          | 0           |  |  |
| Bacteria.Actinobacteria.Actinobacteria.Coriobacteriales.Coriobacteriaceae.Asaccharobacter          | 0           |  |  |
| Bacteria.Actinobacteria.Actinobacteria.Coriobacteriales.Coriobacteriaceae.Atopobium                | 0           |  |  |
| Bacteria.Actinobacteria.Actinobacteria.Coriobacteriales.Coriobacteriaceae.Collinsella              | 0           |  |  |
| Bacteria.Actinobacteria.Actinobacteria.Coriobacteriales.Coriobacteriaceae.Eggerthella              | 0           |  |  |
| Bacteria.Actinobacteria.Actinobacteria.Coriobacteriales.Coriobacteriaceae.Olsenella                | 0           |  |  |
| Bacteria.Actinobacteria.Actinobacteria.Coriobacteriales.Coriobacteriaceae.Paraeggerthella          | 0           |  |  |
| Bacteria.Actinobacteria.Actinobacteria.Coriobacteriales.Coriobacteriaceae.unclassified_genus       | 0           |  |  |
| Bacteria.Actinobacteria.Actinobacteria.Rubrobacteriales                                            | 0           |  |  |
| Bacteria.Actinobacteria.Actinobacteria.Rubrobacteriales.Rubrobacteraceae                           | 0           |  |  |
| Bacteria.Actinobacteria.Actinobacteria.Rubrobacteriales.Rubrobacteraceae.Rubrobacter               | 0           |  |  |
| Bacteria.Actinobacteria.Actinobacteria.Solirubrobacteriales                                        | 0           |  |  |
| Bacteria.Actinobacteria.Actinobacteria.Solirubrobacteriales.Conexibacteraceae                      | 0           |  |  |
| Bacteria.Actinobacteria.Actinobacteria.Solirubrobacteriales.Conexibacteraceae.Conexibacter         | 0           |  |  |
| Bacteria.Actinobacteria.Actinobacteria.Solirubrobacteriales.Solirubrobacteraceae                   | 0           |  |  |
| Bacteria.Actinobacteria.Actinobacteria.Solirubrobacteriales.Solirubrobacteraceae.Solirubrobacter   | 0           |  |  |
| Bacteria.Actinobacteria.Actinobacteria.Solirubrobacteriales.unclassified_family                    | 0           |  |  |
| Bacteria.Actinobacteria.Actinobacteria.Solirubrobacteriales.unclassified_family.unclassified_genus | 0           |  |  |
| Bacteria.Actinobacteria.Actinobacteria.unclassified_order                                          | 0           |  |  |
| Bacteria.Actinobacteria.Actinobacteria.unclassified_order.unclassified_family                      | 0           |  |  |
| Bacteria.Actinobacteria.Actinobacteria.unclassified_order.unclassified_family.unclassified_genus   | 0           |  |  |
| Bacteria.Aquificae                                                                                 | 0           |  |  |
| Bacteria.Aquificae.Aquificae                                                                       | 0           |  |  |
| Bacteria.Aquificae.Aquificae.Aquificales                                                           | 0           |  |  |
| Bacteria.Aquificae.Aquificae.Aquificales.Hydrogenothermaceae                                       | 0           |  |  |
| Bacteria.Aquificae.Aquificae.Aquificales.Hydrogenothermaceae.Sulfurihydrogenibium                  | 0           |  |  |
| Bacteria.Bacteroidetes                                                                             | 4.369799832 |  |  |
| Bacteria.Bacteroidetes.Bacteroidia                                                                 | 3.390152164 |  |  |
| Bacteria.Bacteroidetes.Bacteroidia.Bacteroidales                                                   | 3.390152164 |  |  |
| Bacteria.Bacteroidetes.Bacteroidia.Bacteroidales.Bacteroidaceae                                    | 0           |  |  |
| Bacteria.Bacteroidetes.Bacteroidia.Bacteroidales.Bacteroidaceae.Bacteroides                        | 0           |  |  |
| Bacteria.Bacteroidetes.Bacteroidia.Bacteroidales.Porphyrionadaceae                                 | 3.390152164 |  |  |
| Bacteria.Bacteroidetes.Bacteroidia.Bacteroidales.Porphyrionadaceae.Dysgonomonas                    | 0           |  |  |
| Bacteria.Bacteroidetes.Bacteroidia.Bacteroidales.Porphyrionadaceae.Porphyrionomonas                | 0           |  |  |
| Bacteria.Bacteroidetes.Bacteroidia.Bacteroidales.Porphyrionadaceae.Proteiniphilum                  | 0           |  |  |
| Bacteria.Bacteroidetes.Bacteroidia.Bacteroidales.Porphyrionadaceae.unclassified_genus              | 3.390152164 |  |  |
| Bacteria.Bacteroidetes.Bacteroidia.Bacteroidales.Prevotellaceae                                    | 0           |  |  |
| Bacteria.Bacteroidetes.Bacteroidia.Bacteroidales.Prevotellaceae.Hallella                           | 0           |  |  |
| Bacteria.Bacteroidetes.Bacteroidia.Bacteroidales.Prevotellaceae.Prevotella                         | 0           |  |  |
| Bacteria.Bacteroidetes.Bacteroidia.Bacteroidales.Prevotellaceae.unclassified_genus                 | 0           |  |  |
| Bacteria.Bacteroidetes.Bacteroidia.Bacteroidales.unclassified_family                               | 0           |  |  |
| Bacteria.Bacteroidetes.Bacteroidia.Bacteroidales.unclassified_family.unclassified_genus            | 0           |  |  |
| Bacteria.Bacteroidetes.Flavobacteria                                                               | 4.216231133 |  |  |
| Bacteria.Bacteroidetes.Flavobacteria.Flavobacteriales                                              | 4.216231133 |  |  |
| Bacteria.Bacteroidetes.Flavobacteria.Flavobacteriales.Cryomorphaceae                               | 0           |  |  |
| Bacteria.Bacteroidetes.Flavobacteria.Flavobacteriales.Cryomorphaceae.Fluvicola                     | 0           |  |  |
| Bacteria.Bacteroidetes.Flavobacteria.Flavobacteriales.Flavobacteriaceae                            | 4.216231133 |  |  |
| Bacteria.Bacteroidetes.Flavobacteria.Flavobacteriales.Flavobacteriaceae.Capnocytophaga             | 0           |  |  |
| Bacteria.Bacteroidetes.Flavobacteria.Flavobacteriales.Flavobacteriaceae.Chryseobacterium           | 4.105452614 |  |  |
| Bacteria.Bacteroidetes.Flavobacteria.Flavobacteriales.Flavobacteriaceae.Cloacibacterium            | 3.571877254 |  |  |
| Bacteria.Bacteroidetes.Flavobacteria.Flavobacteriales.Flavobacteriaceae.Flavobacterium             | 3.086716098 |  |  |
| Bacteria.Bacteroidetes.Flavobacteria.Flavobacteriales.Flavobacteriaceae.Myroides                   | 0           |  |  |

|                                                                                                     |             |  |
|-----------------------------------------------------------------------------------------------------|-------------|--|
| Bacteria.Bacteroidetes.Flavobacteria.Flavobacteriales.Flavobacteriaceae.Riemerella                  | 0           |  |
| Bacteria.Bacteroidetes.Flavobacteria.Flavobacteriales.Flavobacteriaceae.Salinimicrobium             | 0           |  |
| Bacteria.Bacteroidetes.Flavobacteria.Flavobacteriales.Flavobacteriaceae.unclassified_genus          | 0           |  |
| Bacteria.Bacteroidetes.Flavobacteria.Flavobacteriales.Flavobacteriaceae.Wautersiella                | 0           |  |
| Bacteria.Bacteroidetes.Flavobacteria.Flavobacteriales.unclassified_family                           | 0           |  |
| Bacteria.Bacteroidetes.Flavobacteria.Flavobacteriales.unclassified_genus                            | 0           |  |
| Bacteria.Bacteroidetes.Sphingobacteria                                                              | 3.692407098 |  |
| Bacteria.Bacteroidetes.Sphingobacteria.Sphingobacteriales                                           | 3.692407098 |  |
| Bacteria.Bacteroidetes.Sphingobacteria.Sphingobacteriales.Chitinophagaceae                          | 0           |  |
| Bacteria.Bacteroidetes.Sphingobacteria.Sphingobacteriales.Chitinophagaceae.Ferruginibacter          | 0           |  |
| Bacteria.Bacteroidetes.Sphingobacteria.Sphingobacteriales.Chitinophagaceae.Filimonas                | 0           |  |
| Bacteria.Bacteroidetes.Sphingobacteria.Sphingobacteriales.Chitinophagaceae.Flavisolibacter          | 0           |  |
| Bacteria.Bacteroidetes.Sphingobacteria.Sphingobacteriales.Chitinophagaceae.unclassified_genus       | 0           |  |
| Bacteria.Bacteroidetes.Sphingobacteria.Sphingobacteriales.Cytophagaceae                             | 3.096367484 |  |
| Bacteria.Bacteroidetes.Sphingobacteria.Sphingobacteriales.Cytophagaceae.Adhaeribacter               | 0           |  |
| Bacteria.Bacteroidetes.Sphingobacteria.Sphingobacteriales.Cytophagaceae.Cytophaga                   | 0           |  |
| Bacteria.Bacteroidetes.Sphingobacteria.Sphingobacteriales.Cytophagaceae.Dvadobacter                 | 0           |  |
| Bacteria.Bacteroidetes.Sphingobacteria.Sphingobacteriales.Cytophagaceae.Ermicicia                   | 0           |  |
| Bacteria.Bacteroidetes.Sphingobacteria.Sphingobacteriales.Cytophagaceae.Flectobacillus              | 3.096367484 |  |
| Bacteria.Bacteroidetes.Sphingobacteria.Sphingobacteriales.Cytophagaceae.Hymenobacter                | 0           |  |
| Bacteria.Bacteroidetes.Sphingobacteria.Sphingobacteriales.Cytophagaceae.Pontibacter                 | 0           |  |
| Bacteria.Bacteroidetes.Sphingobacteria.Sphingobacteriales.Cytophagaceae.Runella                     | 0           |  |
| Bacteria.Bacteroidetes.Sphingobacteria.Sphingobacteriales.Cytophagaceae.Sporocytophaga              | 0           |  |
| Bacteria.Bacteroidetes.Sphingobacteria.Sphingobacteriales.Cytophagaceae.unclassified_genus          | 0           |  |
| Bacteria.Bacteroidetes.Sphingobacteria.Sphingobacteriales.Sphingobacteriaceae                       | 3.56544288  |  |
| Bacteria.Bacteroidetes.Sphingobacteria.Sphingobacteriales.Sphingobacteriaceae.Nubsella              | 0           |  |
| Bacteria.Bacteroidetes.Sphingobacteria.Sphingobacteriales.Sphingobacteriaceae.Pedobacter            | 0           |  |
| Bacteria.Bacteroidetes.Sphingobacteria.Sphingobacteriales.Sphingobacteriaceae.Sphingobacterium      | 3.56544288  |  |
| Bacteria.Bacteroidetes.Sphingobacteria.Sphingobacteriales.Sphingobacteriaceae.unclassified_genus    | 0           |  |
| Bacteria.Bacteroidetes.Sphingobacteria.Sphingobacteriales.unclassified_family                       | 0           |  |
| Bacteria.Bacteroidetes.Sphingobacteria.Sphingobacteriales.unclassified_family.unclassified_genus    | 0           |  |
| Bacteria.Bacteroidetes.unclassified_class                                                           | 0           |  |
| Bacteria.Bacteroidetes.unclassified_class.unclassified_order                                        | 0           |  |
| Bacteria.Bacteroidetes.unclassified_class.unclassified_order.unclassified_family                    | 0           |  |
| Bacteria.Bacteroidetes.unclassified_class.unclassified_order.unclassified_family.unclassified_genus | 0           |  |
| Bacteria.Chloroflexi                                                                                | 0           |  |
| Bacteria.Chloroflexi.Anaerolineae                                                                   | 0           |  |
| Bacteria.Chloroflexi.Anaerolineae.Anaerolineales                                                    | 0           |  |
| Bacteria.Chloroflexi.Anaerolineae.Anaerolineales.Anaerolineaceae                                    | 0           |  |
| Bacteria.Chloroflexi.Anaerolineae.Anaerolineales.Anaerolineaceae.unclassified_genus                 | 0           |  |
| Bacteria.Chloroflexi.Caldilineae                                                                    | 0           |  |
| Bacteria.Chloroflexi.Caldilineae.Caldilineales                                                      | 0           |  |
| Bacteria.Chloroflexi.Caldilineae.Caldilineales.Caldilineaceae                                       | 0           |  |
| Bacteria.Chloroflexi.Caldilineae.Caldilineales.Caldilineaceae.Caldilinea                            | 0           |  |
| Bacteria.Chloroflexi.Thermomicrobium                                                                | 0           |  |
| Bacteria.Chloroflexi.Thermomicrobium.Sphaerobacteriales                                             | 0           |  |
| Bacteria.Chloroflexi.Thermomicrobium.Sphaerobacteriales.Sphaerobacteraceae                          | 0           |  |
| Bacteria.Chloroflexi.Thermomicrobium.Sphaerobacteriales.Sphaerobacteraceae.Sphaerobacter            | 0           |  |
| Bacteria.Chloroflexi.Thermomicrobium.unclassified_order                                             | 0           |  |
| Bacteria.Chloroflexi.Thermomicrobium.unclassified_order.unclassified_family                         | 0           |  |
| Bacteria.Chloroflexi.Thermomicrobium.unclassified_order.unclassified_family.unclassified_genus      | 0           |  |
| Bacteria.Chloroflexi.unclassified_class                                                             | 0           |  |
| Bacteria.Chloroflexi.unclassified_class.unclassified_order                                          | 0           |  |
| Bacteria.Chloroflexi.unclassified_class.unclassified_order.unclassified_family                      | 0           |  |
| Bacteria.Chloroflexi.unclassified_class.unclassified_order.unclassified_family.unclassified_genus   | 0           |  |
| Bacteria.Deinococcus_Thermus                                                                        | 0           |  |
| Bacteria.Deinococcus_Thermus.Deinococci                                                             | 0           |  |
| Bacteria.Deinococcus_Thermus.Deinococci.Deinococcales                                               | 0           |  |
| Bacteria.Deinococcus_Thermus.Deinococci.Deinococcales.Deinococcaceae                                | 0           |  |
| Bacteria.Deinococcus_Thermus.Deinococci.Deinococcales.Deinococcaceae.Deinococcus                    | 0           |  |
| Bacteria.Deinococcus_Thermus.Deinococci.Deinococcales.Trueperaceae                                  | 0           |  |
| Bacteria.Deinococcus_Thermus.Deinococci.Deinococcales.Trueperaceae.Truepera                         | 0           |  |
| Bacteria.Deinococcus_Thermus.Deinococci.Themales                                                    | 0           |  |
| Bacteria.Deinococcus_Thermus.Deinococci.Themales.Thermaceae                                         | 0           |  |
| Bacteria.Deinococcus_Thermus.Deinococci.Themales.Thermaceae.Meiothermus                             | 0           |  |
| Bacteria.Deinococcus_Thermus.Deinococci.unclassified_order                                          | 0           |  |
| Bacteria.Deinococcus_Thermus.Deinococci.unclassified_order.unclassified_family                      | 0           |  |
| Bacteria.Deinococcus_Thermus.Deinococci.unclassified_order.unclassified_family.unclassified_genus   | 0           |  |
| Bacteria.Firmicutes                                                                                 | 5.749572879 |  |
| Bacteria.Firmicutes.Bacilli                                                                         | 5.732048228 |  |
| Bacteria.Firmicutes.Bacilli.Bacillales                                                              | 4.043655146 |  |
| Bacteria.Firmicutes.Bacilli.Bacillales.Alicyclobacillaceae                                          | 0           |  |
| Bacteria.Firmicutes.Bacilli.Bacillales.Alicyclobacillaceae.Alicyclobacillus                         | 0           |  |
| Bacteria.Firmicutes.Bacilli.Bacillales.Bacillaceae                                                  | 4.043655146 |  |
| Bacteria.Firmicutes.Bacilli.Bacillales.Bacillaceae.Anoxybacillus                                    | 0           |  |
| Bacteria.Firmicutes.Bacilli.Bacillales.Bacillaceae.Bacillus                                         | 3.992838517 |  |
| Bacteria.Firmicutes.Bacilli.Bacillales.Bacillaceae.Caldalkalibacillus                               | 0           |  |
| Bacteria.Firmicutes.Bacilli.Bacillales.Bacillaceae.Cerasibacillus                                   | 0           |  |
| Bacteria.Firmicutes.Bacilli.Bacillales.Bacillaceae.Exiguobacterium                                  | 3.086716098 |  |
| Bacteria.Firmicutes.Bacilli.Bacillales.Bacillaceae.Geobacillus                                      | 0           |  |
| Bacteria.Firmicutes.Bacilli.Bacillales.Bacillaceae.Gracilibacillus                                  | 0           |  |
| Bacteria.Firmicutes.Bacilli.Bacillales.Bacillaceae.Lentibacillus                                    | 0           |  |
| Bacteria.Firmicutes.Bacilli.Bacillales.Bacillaceae.Lysinibacillus                                   | 0           |  |
| Bacteria.Firmicutes.Bacilli.Bacillales.Bacillaceae.Oceanobacillus                                   | 0           |  |
| Bacteria.Firmicutes.Bacilli.Bacillales.Bacillaceae.Ornithinibacillus                                | 0           |  |
| Bacteria.Firmicutes.Bacilli.Bacillales.Bacillaceae.Tenuibacillus                                    | 0           |  |
| Bacteria.Firmicutes.Bacilli.Bacillales.Bacillaceae.Terribacillus                                    | 0           |  |
| Bacteria.Firmicutes.Bacilli.Bacillales.Bacillaceae.Tumebacillus                                     | 0           |  |
| Bacteria.Firmicutes.Bacilli.Bacillales.Bacillaceae.unclassified_genus                               | 0           |  |
| Bacteria.Firmicutes.Bacilli.Bacillales.Bacillaceae.Ureibacillus                                     | 0           |  |
| Bacteria.Firmicutes.Bacilli.Bacillales.Bacillaceae.Virgibacillus                                    | 0           |  |
| Bacteria.Firmicutes.Bacilli.Bacillales.Bacillales_incertae_sedis                                    | 0           |  |
| Bacteria.Firmicutes.Bacilli.Bacillales.Bacillales_incertae_sedis.Rummeliibacillus                   | 0           |  |
| Bacteria.Firmicutes.Bacilli.Bacillales.Bacillales_incertae_sedis.Solibacillus                       | 0           |  |
| Bacteria.Firmicutes.Bacilli.Bacillales.Listeriaceae                                                 | 0           |  |
| Bacteria.Firmicutes.Bacilli.Bacillales.Listeriaceae.Brochothrix                                     | 0           |  |
| Bacteria.Firmicutes.Bacilli.Bacillales.Listeriaceae.Listeria                                        | 0           |  |
| Bacteria.Firmicutes.Bacilli.Bacillales.Paenibacillaceae                                             | 0           |  |
| Bacteria.Firmicutes.Bacilli.Bacillales.Paenibacillaceae.Ammoniphilus                                | 0           |  |
| Bacteria.Firmicutes.Bacilli.Bacillales.Paenibacillaceae.Aneurinibacillus                            | 0           |  |
| Bacteria.Firmicutes.Bacilli.Bacillales.Paenibacillaceae.Brevibacillus                               | 0           |  |
| Bacteria.Firmicutes.Bacilli.Bacillales.Paenibacillaceae.Cohnella                                    | 0           |  |
| Bacteria.Firmicutes.Bacilli.Bacillales.Paenibacillaceae.Oxalophagus                                 | 0           |  |

|                                                                                       |             |  |
|---------------------------------------------------------------------------------------|-------------|--|
| Bacteria.Firmicutes.Bacilli.Bacillales.Paenibacillaceae.Paenibacillus                 | 0           |  |
| Bacteria.Firmicutes.Bacilli.Bacillales.Paenibacillaceae.Saccharibacillus              | 0           |  |
| Bacteria.Firmicutes.Bacilli.Bacillales.Paenibacillaceae.unclassified_genus            | 0           |  |
| Bacteria.Firmicutes.Bacilli.Bacillales.Planococcaceae                                 | 0           |  |
| Bacteria.Firmicutes.Bacilli.Bacillales.Planococcaceae.Bhargavaea                      | 0           |  |
| Bacteria.Firmicutes.Bacilli.Bacillales.Planococcaceae.Kurthia                         | 0           |  |
| Bacteria.Firmicutes.Bacilli.Bacillales.Planococcaceae.Planococcus                     | 0           |  |
| Bacteria.Firmicutes.Bacilli.Bacillales.Planococcaceae.Planomicrobium                  | 0           |  |
| Bacteria.Firmicutes.Bacilli.Bacillales.Planococcaceae.Sporosarcina                    | 0           |  |
| Bacteria.Firmicutes.Bacilli.Bacillales.Planococcaceae.unclassified_genus              | 0           |  |
| Bacteria.Firmicutes.Bacilli.Bacillales.Staphylococcaceae                              | 3.258060922 |  |
| Bacteria.Firmicutes.Bacilli.Bacillales.Staphylococcaceae.Gemella                      | 0           |  |
| Bacteria.Firmicutes.Bacilli.Bacillales.Staphylococcaceae.Jeotgaliococcus              | 0           |  |
| Bacteria.Firmicutes.Bacilli.Bacillales.Staphylococcaceae.Macrocooccus                 | 0           |  |
| Bacteria.Firmicutes.Bacilli.Bacillales.Staphylococcaceae.Nosocomiocooccus             | 0           |  |
| Bacteria.Firmicutes.Bacilli.Bacillales.Staphylococcaceae.Saliniococcus                | 0           |  |
| Bacteria.Firmicutes.Bacilli.Bacillales.Staphylococcaceae.Staphylococcus               | 3.258060922 |  |
| Bacteria.Firmicutes.Bacilli.Bacillales.Thermoactinomycetaceae                         | 0           |  |
| Bacteria.Firmicutes.Bacilli.Bacillales.Thermoactinomycetaceae.Thermoactinomycetes     | 0           |  |
| Bacteria.Firmicutes.Bacilli.Bacillales.Thermoactinomycetaceae.unclassified_genus      | 0           |  |
| Bacteria.Firmicutes.Bacilli.Bacillales.unclassified_family                            | 0           |  |
| Bacteria.Firmicutes.Bacilli.Bacillales.unclassified_family.unclassified_genus         | 0           |  |
| Bacteria.Firmicutes.Bacilli.Lactobacillales                                           | 5.727600533 |  |
| Bacteria.Firmicutes.Bacilli.Lactobacillales.Aerococcaceae                             | 0           |  |
| Bacteria.Firmicutes.Bacilli.Lactobacillales.Aerococcaceae.Abiotrophia                 | 0           |  |
| Bacteria.Firmicutes.Bacilli.Lactobacillales.Aerococcaceae.Aerococcus                  | 0           |  |
| Bacteria.Firmicutes.Bacilli.Lactobacillales.Aerococcaceae.Eremococcus                 | 0           |  |
| Bacteria.Firmicutes.Bacilli.Lactobacillales.Aerococcaceae.Globicatella                | 0           |  |
| Bacteria.Firmicutes.Bacilli.Lactobacillales.Carnobacteriaceae                         | 4.69321689  |  |
| Bacteria.Firmicutes.Bacilli.Lactobacillales.Carnobacteriaceae.Atopostipes             | 0           |  |
| Bacteria.Firmicutes.Bacilli.Lactobacillales.Carnobacteriaceae.Carnobacterium          | 4.69321689  |  |
| Bacteria.Firmicutes.Bacilli.Lactobacillales.Carnobacteriaceae.Desemzia                | 0           |  |
| Bacteria.Firmicutes.Bacilli.Lactobacillales.Carnobacteriaceae.Granulicatella          | 0           |  |
| Bacteria.Firmicutes.Bacilli.Lactobacillales.Carnobacteriaceae.Marinilactibacillus     | 0           |  |
| Bacteria.Firmicutes.Bacilli.Lactobacillales.Carnobacteriaceae.Trichococcus            | 0           |  |
| Bacteria.Firmicutes.Bacilli.Lactobacillales.Carnobacteriaceae.unclassified_genus      | 0           |  |
| Bacteria.Firmicutes.Bacilli.Lactobacillales.Enterococcaceae                           | 4.039659764 |  |
| Bacteria.Firmicutes.Bacilli.Lactobacillales.Enterococcaceae.Enterococcus              | 4.039659764 |  |
| Bacteria.Firmicutes.Bacilli.Lactobacillales.Enterococcaceae.unclassified_genus        | 0           |  |
| Bacteria.Firmicutes.Bacilli.Lactobacillales.Enterococcaceae.Vagococcus                | 0           |  |
| Bacteria.Firmicutes.Bacilli.Lactobacillales.Lactobacillaceae                          | 3.735216387 |  |
| Bacteria.Firmicutes.Bacilli.Lactobacillales.Lactobacillaceae.Lactobacillus            | 3.735216387 |  |
| Bacteria.Firmicutes.Bacilli.Lactobacillales.Lactobacillaceae.Pediococcus              | 0           |  |
| Bacteria.Firmicutes.Bacilli.Lactobacillales.Lactobacillaceae.unclassified_genus       | 0           |  |
| Bacteria.Firmicutes.Bacilli.Lactobacillales.Leuconostocaceae                          | 5.566018816 |  |
| Bacteria.Firmicutes.Bacilli.Lactobacillales.Leuconostocaceae.Leuconostoc              | 5.016217517 |  |
| Bacteria.Firmicutes.Bacilli.Lactobacillales.Leuconostocaceae.unclassified_genus       | 3.556749702 |  |
| Bacteria.Firmicutes.Bacilli.Lactobacillales.Leuconostocaceae.Weissella                | 5.416201657 |  |
| Bacteria.Firmicutes.Bacilli.Lactobacillales.Streptococcaceae                          | 5.174747385 |  |
| Bacteria.Firmicutes.Bacilli.Lactobacillales.Streptococcaceae.Lactococcus              | 5.112000431 |  |
| Bacteria.Firmicutes.Bacilli.Lactobacillales.Streptococcaceae.Streptococcus            | 4.262103168 |  |
| Bacteria.Firmicutes.Bacilli.Lactobacillales.Streptococcaceae.unclassified_genus       | 3.262807357 |  |
| Bacteria.Firmicutes.Bacilli.Lactobacillales.unclassified_family                       | 3.086716098 |  |
| Bacteria.Firmicutes.Bacilli.Lactobacillales.unclassified_family.unclassified_genus    | 3.086716098 |  |
| Bacteria.Firmicutes.Bacilli.unclassified_order                                        | 0           |  |
| Bacteria.Firmicutes.Bacilli.unclassified_order.unclassified_family                    | 0           |  |
| Bacteria.Firmicutes.Bacilli.unclassified_order.unclassified_family.unclassified_genus | 0           |  |
| Bacteria.Firmicutes.Clostridia                                                        | 4.346705098 |  |
| Bacteria.Firmicutes.Clostridia.Clostridiales                                          | 4.346705098 |  |
| Bacteria.Firmicutes.Clostridia.Clostridiales.Clostridiaceae                           | 3.253365801 |  |
| Bacteria.Firmicutes.Clostridia.Clostridiales.Clostridiaceae.Clostridium               | 3.253365801 |  |
| Bacteria.Firmicutes.Clostridia.Clostridiales.Clostridiaceae.Thermobrachium            | 0           |  |
| Bacteria.Firmicutes.Clostridia.Clostridiales.Clostridiaceae.unclassified_genus        | 0           |  |
| Bacteria.Firmicutes.Clostridia.Clostridiales.Eubacteriaceae                           | 0           |  |
| Bacteria.Firmicutes.Clostridia.Clostridiales.Eubacteriaceae.Eubacterium               | 0           |  |
| Bacteria.Firmicutes.Clostridia.Clostridiales.Eubacteriaceae.unclassified_genus        | 0           |  |
| Bacteria.Firmicutes.Clostridia.Clostridiales.IncertaeSedisXI                          | 3.086716098 |  |
| Bacteria.Firmicutes.Clostridia.Clostridiales.IncertaeSedisXI.Anaerococcus             | 0           |  |
| Bacteria.Firmicutes.Clostridia.Clostridiales.IncertaeSedisXI.Anaerosphaera            | 0           |  |
| Bacteria.Firmicutes.Clostridia.Clostridiales.IncertaeSedisXI.Finegoldia               | 0           |  |
| Bacteria.Firmicutes.Clostridia.Clostridiales.IncertaeSedisXI.Gallicola                | 0           |  |
| Bacteria.Firmicutes.Clostridia.Clostridiales.IncertaeSedisXI.Parvimonas               | 0           |  |
| Bacteria.Firmicutes.Clostridia.Clostridiales.IncertaeSedisXI.Peptoniphilus            | 0           |  |
| Bacteria.Firmicutes.Clostridia.Clostridiales.IncertaeSedisXI.Sporanaerobacter         | 0           |  |
| Bacteria.Firmicutes.Clostridia.Clostridiales.IncertaeSedisXI.Tepidimicrobium          | 0           |  |
| Bacteria.Firmicutes.Clostridia.Clostridiales.IncertaeSedisXI.Tissierella              | 0           |  |
| Bacteria.Firmicutes.Clostridia.Clostridiales.IncertaeSedisXI.unclassified_genus       | 3.086716098 |  |
| Bacteria.Firmicutes.Clostridia.Clostridiales.IncertaeSedisXIII                        | 0           |  |
| Bacteria.Firmicutes.Clostridia.Clostridiales.IncertaeSedisXIII.Anaerovorax            | 0           |  |
| Bacteria.Firmicutes.Clostridia.Clostridiales.IncertaeSedisXIII.unclassified_genus     | 0           |  |
| Bacteria.Firmicutes.Clostridia.Clostridiales.IncertaeSedisXIV                         | 0           |  |
| Bacteria.Firmicutes.Clostridia.Clostridiales.IncertaeSedisXIV.Blautia                 | 0           |  |
| Bacteria.Firmicutes.Clostridia.Clostridiales.Lachnospiraceae                          | 0           |  |
| Bacteria.Firmicutes.Clostridia.Clostridiales.Lachnospiraceae.Anaerospobacter          | 0           |  |
| Bacteria.Firmicutes.Clostridia.Clostridiales.Lachnospiraceae.Oribacterium             | 0           |  |
| Bacteria.Firmicutes.Clostridia.Clostridiales.Lachnospiraceae.unclassified_genus       | 0           |  |
| Bacteria.Firmicutes.Clostridia.Clostridiales.Peptococcaceae                           | 0           |  |
| Bacteria.Firmicutes.Clostridia.Clostridiales.Peptococcaceae.Peptococcus               | 0           |  |
| Bacteria.Firmicutes.Clostridia.Clostridiales.Peptococcaceae.unclassified_genus        | 0           |  |
| Bacteria.Firmicutes.Clostridia.Clostridiales.Peptostreptococcaceae                    | 3.086716098 |  |
| Bacteria.Firmicutes.Clostridia.Clostridiales.Peptostreptococcaceae.Peptostreptococcus | 0           |  |
| Bacteria.Firmicutes.Clostridia.Clostridiales.Peptostreptococcaceae.Sporacetigenium    | 0           |  |
| Bacteria.Firmicutes.Clostridia.Clostridiales.Peptostreptococcaceae.unclassified_genus | 3.086716098 |  |
| Bacteria.Firmicutes.Clostridia.Clostridiales.Ruminococcaceae                          | 3.976336082 |  |
| Bacteria.Firmicutes.Clostridia.Clostridiales.Ruminococcaceae.Acetivibrio              | 0           |  |
| Bacteria.Firmicutes.Clostridia.Clostridiales.Ruminococcaceae.Anaerofilium             | 0           |  |
| Bacteria.Firmicutes.Clostridia.Clostridiales.Ruminococcaceae.Anaerotruncus            | 0           |  |
| Bacteria.Firmicutes.Clostridia.Clostridiales.Ruminococcaceae.Butyricoccus             | 0           |  |
| Bacteria.Firmicutes.Clostridia.Clostridiales.Ruminococcaceae.Faecalibacterium         | 0           |  |
| Bacteria.Firmicutes.Clostridia.Clostridiales.Ruminococcaceae.Oscillibacter            | 0           |  |
| Bacteria.Firmicutes.Clostridia.Clostridiales.Ruminococcaceae.Ruminococcus             | 0           |  |
| Bacteria.Firmicutes.Clostridia.Clostridiales.Ruminococcaceae.Subdoligranulum          | 0           |  |
| Bacteria.Firmicutes.Clostridia.Clostridiales.Ruminococcaceae.unclassified_genus       | 3.976336082 |  |



|                                                                                                                 |             |  |
|-----------------------------------------------------------------------------------------------------------------|-------------|--|
| Bacteria.Firmicutes.Clostridia.Clostridiales.unclassified_family                                                | 0           |  |
| Bacteria.Firmicutes.Clostridia.Clostridiales.unclassified_family.unclassified_genus                             | 0           |  |
| Bacteria.Firmicutes.Clostridia.Clostridiales.Veillonellaceae                                                    | 4.039659764 |  |
| Bacteria.Firmicutes.Clostridia.Clostridiales.Veillonellaceae.Anaerococcus                                       | 0           |  |
| Bacteria.Firmicutes.Clostridia.Clostridiales.Veillonellaceae.Dialister                                          | 0           |  |
| Bacteria.Firmicutes.Clostridia.Clostridiales.Veillonellaceae.Megasphaera                                        | 0           |  |
| Bacteria.Firmicutes.Clostridia.Clostridiales.Veillonellaceae.Phascolarctobacterium                              | 0           |  |
| Bacteria.Firmicutes.Clostridia.Clostridiales.Veillonellaceae.Selenomonas                                        | 0           |  |
| Bacteria.Firmicutes.Clostridia.Clostridiales.Veillonellaceae.Sporomusa                                          | 0           |  |
| Bacteria.Firmicutes.Clostridia.Clostridiales.Veillonellaceae.Sporotalea                                         | 0           |  |
| Bacteria.Firmicutes.Clostridia.Clostridiales.Veillonellaceae.unclassified_genus                                 | 0           |  |
| Bacteria.Firmicutes.Clostridia.Clostridiales.Veillonellaceae.Veillonella                                        | 4.039659764 |  |
| Bacteria.Firmicutes.Clostridia.unclassified_order                                                               | 0           |  |
| Bacteria.Firmicutes.Clostridia.unclassified_order.unclassified_family                                           | 0           |  |
| Bacteria.Firmicutes.Clostridia.unclassified_order.unclassified_family.unclassified_genus                        | 0           |  |
| Bacteria.Firmicutes.Erysipelotrichi                                                                             | 0           |  |
| Bacteria.Firmicutes.Erysipelotrichi.Erysipelotrichales                                                          | 0           |  |
| Bacteria.Firmicutes.Erysipelotrichi.Erysipelotrichales.Erysipelotrichaceae                                      | 0           |  |
| Bacteria.Firmicutes.Erysipelotrichi.Erysipelotrichales.Erysipelotrichaceae.Allobaculum                          | 0           |  |
| Bacteria.Firmicutes.Erysipelotrichi.Erysipelotrichales.Erysipelotrichaceae.Erysipelothrix                       | 0           |  |
| Bacteria.Firmicutes.Erysipelotrichi.Erysipelotrichales.Erysipelotrichaceae.Turicibacter                         | 0           |  |
| Bacteria.Firmicutes.Erysipelotrichi.Erysipelotrichales.Erysipelotrichaceae.unclassified_genus                   | 0           |  |
| Bacteria.Firmicutes.unclassified_class                                                                          | 0           |  |
| Bacteria.Firmicutes.unclassified_class.unclassified_order                                                       | 0           |  |
| Bacteria.Firmicutes.unclassified_class.unclassified_order.unclassified_family                                   | 0           |  |
| Bacteria.Firmicutes.unclassified_class.unclassified_order.unclassified_family.unclassified_genus                | 0           |  |
| Bacteria.Fusobacteria                                                                                           | 0           |  |
| Bacteria.Fusobacteria.Fusobacteria                                                                              | 0           |  |
| Bacteria.Fusobacteria.Fusobacteria.Fusobacteriales                                                              | 0           |  |
| Bacteria.Fusobacteria.Fusobacteria.Fusobacteriales.Fusobacteriaceae                                             | 0           |  |
| Bacteria.Fusobacteria.Fusobacteria.Fusobacteriales.Fusobacteriaceae.Cetobacterium                               | 0           |  |
| Bacteria.Fusobacteria.Fusobacteria.Fusobacteriales.Fusobacteriaceae.Fusobacterium                               | 0           |  |
| Bacteria.Fusobacteria.Fusobacteria.Fusobacteriales.Fusobacteriaceae.unclassified_genus                          | 0           |  |
| Bacteria.Fusobacteria.Fusobacteria.Fusobacteriales.Leptotrichiaceae                                             | 0           |  |
| Bacteria.Fusobacteria.Fusobacteria.Fusobacteriales.Leptotrichiaceae.Leptotrichia                                | 0           |  |
| Bacteria.Fusobacteria.Fusobacteria.Fusobacteriales.Leptotrichiaceae.Seibaldella                                 | 0           |  |
| Bacteria.Fusobacteria.Fusobacteria.Fusobacteriales.unclassified_family                                          | 0           |  |
| Bacteria.Fusobacteria.Fusobacteria.Fusobacteriales.unclassified_family.unclassified_genus                       | 0           |  |
| Bacteria.Gemmatimonadetes                                                                                       | 0           |  |
| Bacteria.Gemmatimonadetes.Gemmatimonadetes                                                                      | 0           |  |
| Bacteria.Gemmatimonadetes.Gemmatimonadetes.Gemmatimonadales                                                     | 0           |  |
| Bacteria.Gemmatimonadetes.Gemmatimonadetes.Gemmatimonadales.Gemmatimonadaceae                                   | 0           |  |
| Bacteria.Gemmatimonadetes.Gemmatimonadetes.Gemmatimonadales.Gemmatimonadaceae.Gemmatimonas                      | 0           |  |
| Bacteria.Nitrospira                                                                                             | 0           |  |
| Bacteria.Nitrospira.Nitrospira                                                                                  | 0           |  |
| Bacteria.Nitrospira.Nitrospira.Nitrospirales                                                                    | 0           |  |
| Bacteria.Nitrospira.Nitrospira.Nitrospirales.Nitrospiraceae                                                     | 0           |  |
| Bacteria.Nitrospira.Nitrospira.Nitrospirales.Nitrospiraceae.Nitrospira                                          | 0           |  |
| Bacteria.OD1                                                                                                    | 0           |  |
| Bacteria.OD1.OD1_genera_incertae_sedis                                                                          | 0           |  |
| Bacteria.OD1.OD1_genera_incertae_sedis.unclassified_order                                                       | 0           |  |
| Bacteria.OD1.OD1_genera_incertae_sedis.unclassified_order.unclassified_family                                   | 0           |  |
| Bacteria.OD1.OD1_genera_incertae_sedis.unclassified_order.unclassified_family.unclassified_genus                | 0           |  |
| Bacteria.Planctomycetes                                                                                         | 0           |  |
| Bacteria.Planctomycetes.Planctomycetacia                                                                        | 0           |  |
| Bacteria.Planctomycetes.Planctomycetacia.Planctomycetales                                                       | 0           |  |
| Bacteria.Planctomycetes.Planctomycetacia.Planctomycetales.Planctomycetaceae                                     | 0           |  |
| Bacteria.Planctomycetes.Planctomycetacia.Planctomycetales.Planctomycetaceae.Gemmata                             | 0           |  |
| Bacteria.Planctomycetes.Planctomycetacia.Planctomycetales.Planctomycetaceae.Planctomycetes                      | 0           |  |
| Bacteria.Planctomycetes.Planctomycetacia.Planctomycetales.Planctomycetaceae.Rhodopirellula                      | 0           |  |
| Bacteria.Planctomycetes.Planctomycetacia.Planctomycetales.Planctomycetaceae.Sinquillisphaera                    | 0           |  |
| Bacteria.Planctomycetes.Planctomycetacia.Planctomycetales.Planctomycetaceae.unclassified_genus                  | 0           |  |
| Bacteria.Proteobacteria                                                                                         | 5.654300166 |  |
| Bacteria.Proteobacteria.Alphaproteobacteria                                                                     | 5.352285676 |  |
| Bacteria.Proteobacteria.Alphaproteobacteria.Alphaproteobacteria_incertae_sedis                                  | 0           |  |
| Bacteria.Proteobacteria.Alphaproteobacteria.Alphaproteobacteria_incertae_sedis.Novispirillum                    | 0           |  |
| Bacteria.Proteobacteria.Alphaproteobacteria.Alphaproteobacteria_incertae_sedis.Novispirillum.unclassified_genus | 0           |  |
| Bacteria.Proteobacteria.Alphaproteobacteria.Caulobacteriales                                                    | 0           |  |
| Bacteria.Proteobacteria.Alphaproteobacteria.Caulobacteriales.Caulobacteraceae                                   | 0           |  |
| Bacteria.Proteobacteria.Alphaproteobacteria.Caulobacteriales.Caulobacteraceae.Asticcacaulis                     | 0           |  |
| Bacteria.Proteobacteria.Alphaproteobacteria.Caulobacteriales.Caulobacteraceae.Brevundimonas                     | 0           |  |
| Bacteria.Proteobacteria.Alphaproteobacteria.Caulobacteriales.Caulobacteraceae.Caulobacter                       | 0           |  |
| Bacteria.Proteobacteria.Alphaproteobacteria.Caulobacteriales.Caulobacteraceae.Phenylobacterium                  | 0           |  |
| Bacteria.Proteobacteria.Alphaproteobacteria.Caulobacteriales.Caulobacteraceae.unclassified_genus                | 0           |  |
| Bacteria.Proteobacteria.Alphaproteobacteria.Rhizobiales                                                         | 4.1699359   |  |
| Bacteria.Proteobacteria.Alphaproteobacteria.Rhizobiales.Bradyrhizobiaceae                                       | 4.132512625 |  |
| Bacteria.Proteobacteria.Alphaproteobacteria.Rhizobiales.Bradyrhizobiaceae.Agromonas                             | 0           |  |
| Bacteria.Proteobacteria.Alphaproteobacteria.Rhizobiales.Bradyrhizobiaceae.Bosea                                 | 0           |  |
| Bacteria.Proteobacteria.Alphaproteobacteria.Rhizobiales.Bradyrhizobiaceae.unclassified_genus                    | 4.132512625 |  |
| Bacteria.Proteobacteria.Alphaproteobacteria.Rhizobiales.Brucellaceae                                            | 0           |  |
| Bacteria.Proteobacteria.Alphaproteobacteria.Rhizobiales.Brucellaceae.Ochrobactrum                               | 0           |  |
| Bacteria.Proteobacteria.Alphaproteobacteria.Rhizobiales.Hyphomicrobiaceae                                       | 0           |  |
| Bacteria.Proteobacteria.Alphaproteobacteria.Rhizobiales.Hyphomicrobiaceae.Devosia                               | 0           |  |
| Bacteria.Proteobacteria.Alphaproteobacteria.Rhizobiales.Hyphomicrobiaceae.unclassified_genus                    | 0           |  |
| Bacteria.Proteobacteria.Alphaproteobacteria.Rhizobiales.Methylobacteriaceae                                     | 0           |  |
| Bacteria.Proteobacteria.Alphaproteobacteria.Rhizobiales.Methylobacteriaceae.Methylobacterium                    | 0           |  |
| Bacteria.Proteobacteria.Alphaproteobacteria.Rhizobiales.Methylobacteriaceae.Methylocystaceae                    | 0           |  |
| Bacteria.Proteobacteria.Alphaproteobacteria.Rhizobiales.Methylobacteriaceae.Methylocystis                       | 0           |  |
| Bacteria.Proteobacteria.Alphaproteobacteria.Rhizobiales.Rhizobiaceae                                            | 0           |  |
| Bacteria.Proteobacteria.Alphaproteobacteria.Rhizobiales.Rhizobiaceae.Rhizobium                                  | 0           |  |
| Bacteria.Proteobacteria.Alphaproteobacteria.Rhizobiales.Rhizobiaceae.Sinorhizobium                              | 0           |  |
| Bacteria.Proteobacteria.Alphaproteobacteria.Rhizobiales.unclassified_family                                     | 3.086716098 |  |
| Bacteria.Proteobacteria.Alphaproteobacteria.Rhizobiales.unclassified_family.unclassified_genus                  | 3.086716098 |  |
| Bacteria.Proteobacteria.Alphaproteobacteria.Rhizobiales.Xanthobacteraceae                                       | 0           |  |
| Bacteria.Proteobacteria.Alphaproteobacteria.Rhizobiales.Xanthobacteraceae.Azorhizobium                          | 0           |  |
| Bacteria.Proteobacteria.Alphaproteobacteria.Rhodobacteriales                                                    | 0           |  |
| Bacteria.Proteobacteria.Alphaproteobacteria.Rhodobacteriales.Rhodobacteraceae                                   | 0           |  |
| Bacteria.Proteobacteria.Alphaproteobacteria.Rhodobacteriales.Rhodobacteraceae.Haematobacter                     | 0           |  |
| Bacteria.Proteobacteria.Alphaproteobacteria.Rhodobacteriales.Rhodobacteraceae.Pannonibacter                     | 0           |  |
| Bacteria.Proteobacteria.Alphaproteobacteria.Rhodobacteriales.Rhodobacteraceae.Paracoccus                        | 0           |  |
| Bacteria.Proteobacteria.Alphaproteobacteria.Rhodobacteriales.Rhodobacteraceae.Rhodobacter                       | 0           |  |
| Bacteria.Proteobacteria.Alphaproteobacteria.Rhodobacteriales.Rhodobacteraceae.Rubellimicrobium                  | 0           |  |
| Bacteria.Proteobacteria.Alphaproteobacteria.Rhodobacteriales.Rhodobacteraceae.unclassified_genus                | 0           |  |

|                                                                                                              |             |  |  |
|--------------------------------------------------------------------------------------------------------------|-------------|--|--|
| Bacteria.Proteobacteria.Alphaproteobacteria.Rhodospirillales                                                 | 0           |  |  |
| Bacteria.Proteobacteria.Alphaproteobacteria.Rhodospirillales.Acetobacteraceae                                | 0           |  |  |
| Bacteria.Proteobacteria.Alphaproteobacteria.Rhodospirillales.Acetobacteraceae.Acetobacter                    | 0           |  |  |
| Bacteria.Proteobacteria.Alphaproteobacteria.Rhodospirillales.Acetobacteraceae.Belnapia                       | 0           |  |  |
| Bacteria.Proteobacteria.Alphaproteobacteria.Rhodospirillales.Acetobacteraceae.Gluconacetobacter              | 0           |  |  |
| Bacteria.Proteobacteria.Alphaproteobacteria.Rhodospirillales.Acetobacteraceae.Gluconobacter                  | 0           |  |  |
| Bacteria.Proteobacteria.Alphaproteobacteria.Rhodospirillales.Acetobacteraceae.Roseococcus                    | 0           |  |  |
| Bacteria.Proteobacteria.Alphaproteobacteria.Rhodospirillales.Acetobacteraceae.Roseomonas                     | 0           |  |  |
| Bacteria.Proteobacteria.Alphaproteobacteria.Rhodospirillales.Acetobacteraceae.unclassified_genus             | 0           |  |  |
| Bacteria.Proteobacteria.Alphaproteobacteria.Rhodospirillales.Rhodospirillaceae                               | 0           |  |  |
| Bacteria.Proteobacteria.Alphaproteobacteria.Rhodospirillales.Rhodospirillaceae.Azospillum                    | 0           |  |  |
| Bacteria.Proteobacteria.Alphaproteobacteria.Rhodospirillales.Rhodospirillaceae.Skermanella                   | 0           |  |  |
| Bacteria.Proteobacteria.Alphaproteobacteria.Rhodospirillales.Rhodospirillaceae.Telmatospillum                | 0           |  |  |
| Bacteria.Proteobacteria.Alphaproteobacteria.Rhodospirillales.Rhodospirillaceae.unclassified_genus            | 0           |  |  |
| Bacteria.Proteobacteria.Alphaproteobacteria.Sphingomonadales                                                 | 5.3304045   |  |  |
| Bacteria.Proteobacteria.Alphaproteobacteria.Sphingomonadales.Erythrobacteraceae                              | 0           |  |  |
| Bacteria.Proteobacteria.Alphaproteobacteria.Sphingomonadales.Erythrobacteraceae.Porphrobacter                | 0           |  |  |
| Bacteria.Proteobacteria.Alphaproteobacteria.Sphingomonadales.Sphingomonadaceae                               | 5.3304045   |  |  |
| Bacteria.Proteobacteria.Alphaproteobacteria.Sphingomonadales.Sphingomonadaceae.Blastomonas                   | 0           |  |  |
| Bacteria.Proteobacteria.Alphaproteobacteria.Sphingomonadales.Sphingomonadaceae.Novosphingobium               | 0           |  |  |
| Bacteria.Proteobacteria.Alphaproteobacteria.Sphingomonadales.Sphingomonadaceae.Sphingobium                   | 0           |  |  |
| Bacteria.Proteobacteria.Alphaproteobacteria.Sphingomonadales.Sphingomonadaceae.Sphingomonas                  | 5.287522158 |  |  |
| Bacteria.Proteobacteria.Alphaproteobacteria.Sphingomonadales.Sphingomonadaceae.unclassified_genus            | 4.321720953 |  |  |
| Bacteria.Proteobacteria.Alphaproteobacteria.Sphingomonadales.unclassified_family                             | 0           |  |  |
| Bacteria.Proteobacteria.Alphaproteobacteria.Sphingomonadales.unclassified_family.unclassified_genus          | 0           |  |  |
| Bacteria.Proteobacteria.Alphaproteobacteria.unclassified_order                                               | 0           |  |  |
| Bacteria.Proteobacteria.Alphaproteobacteria.unclassified_order.unclassified_family                           | 0           |  |  |
| Bacteria.Proteobacteria.Alphaproteobacteria.unclassified_order.unclassified_family.unclassified_genus        | 0           |  |  |
| Bacteria.Proteobacteria.Betaproteobacteria                                                                   | 4.238377799 |  |  |
| Bacteria.Proteobacteria.Betaproteobacteria.Burkholderiales                                                   | 4.172346471 |  |  |
| Bacteria.Proteobacteria.Betaproteobacteria.Burkholderiales.Alcaligenaceae                                    | 0           |  |  |
| Bacteria.Proteobacteria.Betaproteobacteria.Burkholderiales.Alcaligenaceae.Achromobacter                      | 0           |  |  |
| Bacteria.Proteobacteria.Betaproteobacteria.Burkholderiales.Alcaligenaceae.Alcaligenes                        | 0           |  |  |
| Bacteria.Proteobacteria.Betaproteobacteria.Burkholderiales.Alcaligenaceae.Sutterella                         | 0           |  |  |
| Bacteria.Proteobacteria.Betaproteobacteria.Burkholderiales.Alcaligenaceae.unclassified_genus                 | 0           |  |  |
| Bacteria.Proteobacteria.Betaproteobacteria.Burkholderiales.Burkholderiaceae                                  | 0           |  |  |
| Bacteria.Proteobacteria.Betaproteobacteria.Burkholderiales.Burkholderiaceae.Burkholderia                     | 0           |  |  |
| Bacteria.Proteobacteria.Betaproteobacteria.Burkholderiales.Burkholderiaceae.Chilimonas                       | 0           |  |  |
| Bacteria.Proteobacteria.Betaproteobacteria.Burkholderiales.Burkholderiaceae.Cupriavidus                      | 0           |  |  |
| Bacteria.Proteobacteria.Betaproteobacteria.Burkholderiales.Burkholderiaceae.Pandoraea                        | 0           |  |  |
| Bacteria.Proteobacteria.Betaproteobacteria.Burkholderiales.Burkholderiaceae.Polynucleobacter                 | 0           |  |  |
| Bacteria.Proteobacteria.Betaproteobacteria.Burkholderiales.Burkholderiaceae.Ralstonia                        | 0           |  |  |
| Bacteria.Proteobacteria.Betaproteobacteria.Burkholderiales.Burkholderiaceae.unclassified_genus               | 0           |  |  |
| Bacteria.Proteobacteria.Betaproteobacteria.Burkholderiales.Burkholderiales_incertae_sedis                    | 0           |  |  |
| Bacteria.Proteobacteria.Betaproteobacteria.Burkholderiales.Burkholderiales_incertae_sedis.Aquabacterium      | 0           |  |  |
| Bacteria.Proteobacteria.Betaproteobacteria.Burkholderiales.Burkholderiales_incertae_sedis.Ideonella          | 0           |  |  |
| Bacteria.Proteobacteria.Betaproteobacteria.Burkholderiales.Burkholderiales_incertae_sedis.Leptothrix         | 0           |  |  |
| Bacteria.Proteobacteria.Betaproteobacteria.Burkholderiales.Burkholderiales_incertae_sedis.Tepidimonas        | 0           |  |  |
| Bacteria.Proteobacteria.Betaproteobacteria.Burkholderiales.Burkholderiales_incertae_sedis.unclassified_genus | 0           |  |  |
| Bacteria.Proteobacteria.Betaproteobacteria.Burkholderiales.Comamonadaceae                                    | 4.134265621 |  |  |
| Bacteria.Proteobacteria.Betaproteobacteria.Burkholderiales.Comamonadaceae.Acidovorax                         | 4.092521929 |  |  |
| Bacteria.Proteobacteria.Betaproteobacteria.Burkholderiales.Comamonadaceae.Alicyclophilus                     | 0           |  |  |
| Bacteria.Proteobacteria.Betaproteobacteria.Burkholderiales.Comamonadaceae.Comamonas                          | 0           |  |  |
| Bacteria.Proteobacteria.Betaproteobacteria.Burkholderiales.Comamonadaceae.Curvibacter                        | 0           |  |  |
| Bacteria.Proteobacteria.Betaproteobacteria.Burkholderiales.Comamonadaceae.Delftia                            | 0           |  |  |
| Bacteria.Proteobacteria.Betaproteobacteria.Burkholderiales.Comamonadaceae.Diaphorobacter                     | 3.096367484 |  |  |
| Bacteria.Proteobacteria.Betaproteobacteria.Burkholderiales.Comamonadaceae.Hydrogenophaga                     | 0           |  |  |
| Bacteria.Proteobacteria.Betaproteobacteria.Burkholderiales.Comamonadaceae.Pelomonas                          | 0           |  |  |
| Bacteria.Proteobacteria.Betaproteobacteria.Burkholderiales.Comamonadaceae.Polaromonas                        | 0           |  |  |
| Bacteria.Proteobacteria.Betaproteobacteria.Burkholderiales.Comamonadaceae.Rhodiferax                         | 0           |  |  |
| Bacteria.Proteobacteria.Betaproteobacteria.Burkholderiales.Comamonadaceae.unclassified_genus                 | 0           |  |  |
| Bacteria.Proteobacteria.Betaproteobacteria.Burkholderiales.Comamonadaceae.Variovorax                         | 0           |  |  |
| Bacteria.Proteobacteria.Betaproteobacteria.Burkholderiales.Oxalobacteraceae                                  | 0           |  |  |
| Bacteria.Proteobacteria.Betaproteobacteria.Burkholderiales.Oxalobacteraceae.Duganella                        | 0           |  |  |
| Bacteria.Proteobacteria.Betaproteobacteria.Burkholderiales.Oxalobacteraceae.Herbaspirillum                   | 0           |  |  |
| Bacteria.Proteobacteria.Betaproteobacteria.Burkholderiales.Oxalobacteraceae.Janthinobacterium                | 0           |  |  |
| Bacteria.Proteobacteria.Betaproteobacteria.Burkholderiales.Oxalobacteraceae.Massilia                         | 0           |  |  |
| Bacteria.Proteobacteria.Betaproteobacteria.Burkholderiales.Oxalobacteraceae.Oxalobacter                      | 0           |  |  |
| Bacteria.Proteobacteria.Betaproteobacteria.Burkholderiales.Oxalobacteraceae.unclassified_genus               | 0           |  |  |
| Bacteria.Proteobacteria.Betaproteobacteria.Burkholderiales.unclassified_family                               | 3.096367484 |  |  |
| Bacteria.Proteobacteria.Betaproteobacteria.Burkholderiales.unclassified_family.unclassified_genus            | 3.096367484 |  |  |
| Bacteria.Proteobacteria.Betaproteobacteria.Hydrogenophilales                                                 | 0           |  |  |
| Bacteria.Proteobacteria.Betaproteobacteria.Hydrogenophilales.Hydrogenophilaceae                              | 0           |  |  |
| Bacteria.Proteobacteria.Betaproteobacteria.Hydrogenophilales.Hydrogenophilaceae.Hydrogenophilus              | 0           |  |  |
| Bacteria.Proteobacteria.Betaproteobacteria.Hydrogenophilales.Hydrogenophilaceae.Petrobacter                  | 0           |  |  |
| Bacteria.Proteobacteria.Betaproteobacteria.Methylophilales                                                   | 0           |  |  |
| Bacteria.Proteobacteria.Betaproteobacteria.Methylophilales.Methylophilaceae                                  | 0           |  |  |
| Bacteria.Proteobacteria.Betaproteobacteria.Methylophilales.Methylophilaceae.Methylobacillus                  | 0           |  |  |
| Bacteria.Proteobacteria.Betaproteobacteria.Methylophilales.Methylophilaceae.Methylophilus                    | 0           |  |  |
| Bacteria.Proteobacteria.Betaproteobacteria.Methylophilales.Methylophilaceae.unclassified_genus               | 0           |  |  |
| Bacteria.Proteobacteria.Betaproteobacteria.Neisseriales                                                      | 3.735216387 |  |  |
| Bacteria.Proteobacteria.Betaproteobacteria.Neisseriales.Neisseriaceae                                        | 3.735216387 |  |  |
| Bacteria.Proteobacteria.Betaproteobacteria.Neisseriales.Neisseriaceae.Aquitalea                              | 0           |  |  |
| Bacteria.Proteobacteria.Betaproteobacteria.Neisseriales.Neisseriaceae.Kingella                               | 0           |  |  |
| Bacteria.Proteobacteria.Betaproteobacteria.Neisseriales.Neisseriaceae.Microvirgula                           | 3.735216387 |  |  |
| Bacteria.Proteobacteria.Betaproteobacteria.Neisseriales.Neisseriaceae.Neisseria                              | 0           |  |  |
| Bacteria.Proteobacteria.Betaproteobacteria.Neisseriales.Neisseriaceae.unclassified_genus                     | 0           |  |  |
| Bacteria.Proteobacteria.Betaproteobacteria.Neisseriales.Neisseriaceae.Uruburuella                            | 0           |  |  |
| Bacteria.Proteobacteria.Betaproteobacteria.Neisseriales.Neisseriaceae.Vitrosocilla                           | 0           |  |  |
| Bacteria.Proteobacteria.Betaproteobacteria.Neisseriales.Neisseriaceae.Vogesella                              | 0           |  |  |
| Bacteria.Proteobacteria.Betaproteobacteria.Nitrosomonadales                                                  | 0           |  |  |
| Bacteria.Proteobacteria.Betaproteobacteria.Nitrosomonadales.Nitrosomonadaceae                                | 0           |  |  |
| Bacteria.Proteobacteria.Betaproteobacteria.Nitrosomonadales.Nitrosomonadaceae.Nitrosospira                   | 0           |  |  |
| Bacteria.Proteobacteria.Betaproteobacteria.Nitrosomonadales.Nitrosomonadaceae.unclassified_genus             | 0           |  |  |
| Bacteria.Proteobacteria.Betaproteobacteria.Rhodocyclales                                                     | 0           |  |  |
| Bacteria.Proteobacteria.Betaproteobacteria.Rhodocyclales.Rhodocyclaceae                                      | 0           |  |  |
| Bacteria.Proteobacteria.Betaproteobacteria.Rhodocyclales.Rhodocyclaceae.Azonexus                             | 0           |  |  |
| Bacteria.Proteobacteria.Betaproteobacteria.Rhodocyclales.Rhodocyclaceae.Azospira                             | 0           |  |  |
| Bacteria.Proteobacteria.Betaproteobacteria.Rhodocyclales.Rhodocyclaceae.Dechloromonas                        | 0           |  |  |
| Bacteria.Proteobacteria.Betaproteobacteria.Rhodocyclales.Rhodocyclaceae.Methyloversatilis                    | 0           |  |  |
| Bacteria.Proteobacteria.Betaproteobacteria.Rhodocyclales.Rhodocyclaceae.Propionivibrio                       | 0           |  |  |
| Bacteria.Proteobacteria.Betaproteobacteria.Rhodocyclales.Rhodocyclaceae.Shinella                             | 0           |  |  |
| Bacteria.Proteobacteria.Betaproteobacteria.Rhodocyclales.Rhodocyclaceae.Thaueria                             | 0           |  |  |

|                                                                                                             |             |  |  |
|-------------------------------------------------------------------------------------------------------------|-------------|--|--|
| Bacteria.Proteobacteria.Betaproteobacteria.Rhodocyclales.Rhodocyclaceae.unclassified_genus                  | 0           |  |  |
| Bacteria.Proteobacteria.Betaproteobacteria.Rhodocyclales.Rhodocyclaceae.Zoogloea                            | 0           |  |  |
| Bacteria.Proteobacteria.Betaproteobacteria.unclassified_order                                               | 0           |  |  |
| Bacteria.Proteobacteria.Betaproteobacteria.unclassified_order.unclassified_family                           | 0           |  |  |
| Bacteria.Proteobacteria.Betaproteobacteria.unclassified_order.unclassified_family.unclassified_genus        | 0           |  |  |
| Bacteria.Proteobacteria.Deltaproteobacteria                                                                 | 0           |  |  |
| Bacteria.Proteobacteria.Deltaproteobacteria.Bdellovibrionales                                               | 0           |  |  |
| Bacteria.Proteobacteria.Deltaproteobacteria.Bdellovibrionales.Bacteriovoraceae                              | 0           |  |  |
| Bacteria.Proteobacteria.Deltaproteobacteria.Bdellovibrionales.Bacteriovoraceae.Bacteriovorax                | 0           |  |  |
| Bacteria.Proteobacteria.Deltaproteobacteria.Bdellovibrionales.Bacteriovoraceae.Peredibacter                 | 0           |  |  |
| Bacteria.Proteobacteria.Deltaproteobacteria.Bdellovibrionales.Bdellovibrionaceae                            | 0           |  |  |
| Bacteria.Proteobacteria.Deltaproteobacteria.Bdellovibrionales.Bdellovibrionaceae.Bdellovibrio               | 0           |  |  |
| Bacteria.Proteobacteria.Deltaproteobacteria.Desulfovibrionales                                              | 0           |  |  |
| Bacteria.Proteobacteria.Deltaproteobacteria.Desulfovibrionales.Desulfovibrionaceae                          | 0           |  |  |
| Bacteria.Proteobacteria.Deltaproteobacteria.Desulfovibrionales.Desulfovibrionaceae.Desulfovibrio            | 0           |  |  |
| Bacteria.Proteobacteria.Deltaproteobacteria.Desulfuromonadales                                              | 0           |  |  |
| Bacteria.Proteobacteria.Deltaproteobacteria.Desulfuromonadales.Geobacteraceae                               | 0           |  |  |
| Bacteria.Proteobacteria.Deltaproteobacteria.Desulfuromonadales.Geobacteraceae.Geobacter                     | 0           |  |  |
| Bacteria.Proteobacteria.Deltaproteobacteria.Myxococcales                                                    | 0           |  |  |
| Bacteria.Proteobacteria.Deltaproteobacteria.Myxococcales.Cystobacteraceae                                   | 0           |  |  |
| Bacteria.Proteobacteria.Deltaproteobacteria.Myxococcales.Cystobacteraceae.Cystobacter                       | 0           |  |  |
| Bacteria.Proteobacteria.Deltaproteobacteria.Myxococcales.Cystobacteraceae.unclassified_genus                | 0           |  |  |
| Bacteria.Proteobacteria.Deltaproteobacteria.Myxococcales.Nannocystaceae                                     | 0           |  |  |
| Bacteria.Proteobacteria.Deltaproteobacteria.Myxococcales.Nannocystaceae.Nannocystis                         | 0           |  |  |
| Bacteria.Proteobacteria.Deltaproteobacteria.Myxococcales.Polyangiaceae                                      | 0           |  |  |
| Bacteria.Proteobacteria.Deltaproteobacteria.Myxococcales.Polyangiaceae.Byssovorax                           | 0           |  |  |
| Bacteria.Proteobacteria.Deltaproteobacteria.Myxococcales.Polyangiaceae.unclassified_genus                   | 0           |  |  |
| Bacteria.Proteobacteria.Deltaproteobacteria.Myxococcales.unclassified_family                                | 0           |  |  |
| Bacteria.Proteobacteria.Deltaproteobacteria.Myxococcales.unclassified_family.unclassified_genus             | 0           |  |  |
| Bacteria.Proteobacteria.Deltaproteobacteria.unclassified_order                                              | 0           |  |  |
| Bacteria.Proteobacteria.Deltaproteobacteria.unclassified_order.unclassified_family                          | 0           |  |  |
| Bacteria.Proteobacteria.Deltaproteobacteria.unclassified_order.unclassified_family.unclassified_genus       | 0           |  |  |
| Bacteria.Proteobacteria.Epsilonproteobacteria                                                               | 4.039659764 |  |  |
| Bacteria.Proteobacteria.Epsilonproteobacteria.Campylobacteriales                                            | 4.039659764 |  |  |
| Bacteria.Proteobacteria.Epsilonproteobacteria.Campylobacteriales.Campylobacteraceae                         | 4.039659764 |  |  |
| Bacteria.Proteobacteria.Epsilonproteobacteria.Campylobacteriales.Campylobacteraceae.Arcobacter              | 4.039659764 |  |  |
| Bacteria.Proteobacteria.Epsilonproteobacteria.Campylobacteriales.Campylobacteraceae.Campylobacter           | 0           |  |  |
| Bacteria.Proteobacteria.Epsilonproteobacteria.Campylobacteriales.Campylobacteraceae.Sulfurospirillum        | 0           |  |  |
| Bacteria.Proteobacteria.Epsilonproteobacteria.Campylobacteriales.Helicobacteraceae                          | 0           |  |  |
| Bacteria.Proteobacteria.Epsilonproteobacteria.Campylobacteriales.Helicobacteraceae.Helicobacter             | 0           |  |  |
| Bacteria.Proteobacteria.Epsilonproteobacteria.unclassified_order                                            | 0           |  |  |
| Bacteria.Proteobacteria.Epsilonproteobacteria.unclassified_order.unclassified_family                        | 0           |  |  |
| Bacteria.Proteobacteria.Epsilonproteobacteria.unclassified_order.unclassified_family.unclassified_genus     | 0           |  |  |
| Bacteria.Proteobacteria.Gammaproteobacteria                                                                 | 5.323225683 |  |  |
| Bacteria.Proteobacteria.Gammaproteobacteria.Aeromonadales                                                   | 0           |  |  |
| Bacteria.Proteobacteria.Gammaproteobacteria.Aeromonadales.Aeromonadaceae                                    | 0           |  |  |
| Bacteria.Proteobacteria.Gammaproteobacteria.Aeromonadales.Aeromonadaceae.Aeromonas                          | 0           |  |  |
| Bacteria.Proteobacteria.Gammaproteobacteria.Aeromonadales.Aeromonadaceae.unclassified_genus                 | 0           |  |  |
| Bacteria.Proteobacteria.Gammaproteobacteria.Alteromonadales                                                 | 0           |  |  |
| Bacteria.Proteobacteria.Gammaproteobacteria.Alteromonadales.Shewanellaceae                                  | 0           |  |  |
| Bacteria.Proteobacteria.Gammaproteobacteria.Alteromonadales.Shewanellaceae.Shewanella                       | 0           |  |  |
| Bacteria.Proteobacteria.Gammaproteobacteria.Alteromonadales.unclassified_family                             | 0           |  |  |
| Bacteria.Proteobacteria.Gammaproteobacteria.Alteromonadales.unclassified_family.unclassified_genus          | 0           |  |  |
| Bacteria.Proteobacteria.Gammaproteobacteria.Chromatiales                                                    | 0           |  |  |
| Bacteria.Proteobacteria.Gammaproteobacteria.Chromatiales.Chromatiaceae                                      | 0           |  |  |
| Bacteria.Proteobacteria.Gammaproteobacteria.Chromatiales.Chromatiaceae.Rheinheimera                         | 0           |  |  |
| Bacteria.Proteobacteria.Gammaproteobacteria.Enterobacteriales                                               | 4.993318789 |  |  |
| Bacteria.Proteobacteria.Gammaproteobacteria.Enterobacteriales.Enterobacteriaceae                            | 4.993318789 |  |  |
| Bacteria.Proteobacteria.Gammaproteobacteria.Enterobacteriales.Enterobacteriaceae.Buttiauxella               | 0           |  |  |
| Bacteria.Proteobacteria.Gammaproteobacteria.Enterobacteriales.Enterobacteriaceae.Cedecea                    | 0           |  |  |
| Bacteria.Proteobacteria.Gammaproteobacteria.Enterobacteriales.Enterobacteriaceae.Citrobacter                | 4.675105904 |  |  |
| Bacteria.Proteobacteria.Gammaproteobacteria.Enterobacteriales.Enterobacteriaceae.Cronobacter                | 0           |  |  |
| Bacteria.Proteobacteria.Gammaproteobacteria.Enterobacteriales.Enterobacteriaceae.Enterobacter               | 0           |  |  |
| Bacteria.Proteobacteria.Gammaproteobacteria.Enterobacteriales.Enterobacteriaceae.Erwinia                    | 4.202141686 |  |  |
| Bacteria.Proteobacteria.Gammaproteobacteria.Enterobacteriales.Enterobacteriaceae.Escherichia_Shigella       | 3.39739748  |  |  |
| Bacteria.Proteobacteria.Gammaproteobacteria.Enterobacteriales.Enterobacteriaceae.Klebsiella                 | 3.735634029 |  |  |
| Bacteria.Proteobacteria.Gammaproteobacteria.Enterobacteriales.Enterobacteriaceae.Kluyvera                   | 0           |  |  |
| Bacteria.Proteobacteria.Gammaproteobacteria.Enterobacteriales.Enterobacteriaceae.Morganella                 | 0           |  |  |
| Bacteria.Proteobacteria.Gammaproteobacteria.Enterobacteriales.Enterobacteriaceae.Pantoea                    | 4.292341436 |  |  |
| Bacteria.Proteobacteria.Gammaproteobacteria.Enterobacteriales.Enterobacteriaceae.Raoultella                 | 0           |  |  |
| Bacteria.Proteobacteria.Gammaproteobacteria.Enterobacteriales.Enterobacteriaceae.Serratia                   | 3.570295382 |  |  |
| Bacteria.Proteobacteria.Gammaproteobacteria.Enterobacteriales.Enterobacteriaceae.Trabulsiiella              | 0           |  |  |
| Bacteria.Proteobacteria.Gammaproteobacteria.Enterobacteriales.Enterobacteriaceae.unclassified_genus         | 4.105452614 |  |  |
| Bacteria.Proteobacteria.Gammaproteobacteria.Enterobacteriales.Enterobacteriaceae.Yersinia                   | 0           |  |  |
| Bacteria.Proteobacteria.Gammaproteobacteria.Gammaproteobacteria_incertae_sedis                              | 0           |  |  |
| Bacteria.Proteobacteria.Gammaproteobacteria.Gammaproteobacteria_incertae_sedis.Solimonas                    | 0           |  |  |
| Bacteria.Proteobacteria.Gammaproteobacteria.Gammaproteobacteria_incertae_sedis.Solimonas.unclassified_genus | 0           |  |  |
| Bacteria.Proteobacteria.Gammaproteobacteria.Legionellales                                                   | 0           |  |  |
| Bacteria.Proteobacteria.Gammaproteobacteria.Legionellales.Coxiellaceae                                      | 0           |  |  |
| Bacteria.Proteobacteria.Gammaproteobacteria.Legionellales.Coxiellaceae.Aquicella                            | 0           |  |  |
| Bacteria.Proteobacteria.Gammaproteobacteria.Legionellales.Legionellaceae                                    | 0           |  |  |
| Bacteria.Proteobacteria.Gammaproteobacteria.Legionellales.Legionellaceae.Legionella                         | 0           |  |  |
| Bacteria.Proteobacteria.Gammaproteobacteria.Legionellales.Legionellaceae.unclassified_genus                 | 0           |  |  |
| Bacteria.Proteobacteria.Gammaproteobacteria.Oceanospirillales                                               | 0           |  |  |
| Bacteria.Proteobacteria.Gammaproteobacteria.Oceanospirillales.Halomonadaceae                                | 0           |  |  |
| Bacteria.Proteobacteria.Gammaproteobacteria.Oceanospirillales.Halomonadaceae.Halomonas                      | 0           |  |  |
| Bacteria.Proteobacteria.Gammaproteobacteria.Pasteurellales                                                  | 0           |  |  |
| Bacteria.Proteobacteria.Gammaproteobacteria.Pasteurellales.Pasteurellaceae                                  | 0           |  |  |
| Bacteria.Proteobacteria.Gammaproteobacteria.Pasteurellales.Pasteurellaceae.Actinobacillus                   | 0           |  |  |
| Bacteria.Proteobacteria.Gammaproteobacteria.Pasteurellales.Pasteurellaceae.Aggregatibacter                  | 0           |  |  |
| Bacteria.Proteobacteria.Gammaproteobacteria.Pasteurellales.Pasteurellaceae.Haemophilus                      | 0           |  |  |
| Bacteria.Proteobacteria.Gammaproteobacteria.Pasteurellales.Pasteurellaceae.Pasteurella                      | 0           |  |  |
| Bacteria.Proteobacteria.Gammaproteobacteria.Pasteurellales.Pasteurellaceae.unclassified_genus               | 0           |  |  |
| Bacteria.Proteobacteria.Gammaproteobacteria.Pseudomonadales                                                 | 5.044511647 |  |  |
| Bacteria.Proteobacteria.Gammaproteobacteria.Pseudomonadales.Moraxellaceae                                   | 4.932445876 |  |  |
| Bacteria.Proteobacteria.Gammaproteobacteria.Pseudomonadales.Moraxellaceae.Acinetobacter                     | 4.828708568 |  |  |
| Bacteria.Proteobacteria.Gammaproteobacteria.Pseudomonadales.Moraxellaceae.Alkanindiges                      | 0           |  |  |
| Bacteria.Proteobacteria.Gammaproteobacteria.Pseudomonadales.Moraxellaceae.Enhydrobacter                     | 4.039659764 |  |  |
| Bacteria.Proteobacteria.Gammaproteobacteria.Pseudomonadales.Moraxellaceae.Moraxella                         | 0           |  |  |
| Bacteria.Proteobacteria.Gammaproteobacteria.Pseudomonadales.Moraxellaceae.Perlucciabaca                     | 0           |  |  |
| Bacteria.Proteobacteria.Gammaproteobacteria.Pseudomonadales.Moraxellaceae.Psychrobacter                     | 0           |  |  |
| Bacteria.Proteobacteria.Gammaproteobacteria.Pseudomonadales.Moraxellaceae.unclassified_genus                | 3.868905904 |  |  |
| Bacteria.Proteobacteria.Gammaproteobacteria.Pseudomonadales.Pseudomonadaceae                                | 4.644897136 |  |  |

|                                                                                                                     |             |  |
|---------------------------------------------------------------------------------------------------------------------|-------------|--|
| Bacteria.Proteobacteria.Gammaproteobacteria.Pseudomonadales.Pseudomonadaceae.Azorhizophilus                         | 0           |  |
| Bacteria.Proteobacteria.Gammaproteobacteria.Pseudomonadales.Pseudomonadaceae.Celivibrio                             | 0           |  |
| Bacteria.Proteobacteria.Gammaproteobacteria.Pseudomonadales.Pseudomonadaceae.Pseudomonas                            | 4.607133385 |  |
| Bacteria.Proteobacteria.Gammaproteobacteria.Pseudomonadales.Pseudomonadaceae.unclassified_genus                     | 3.56544288  |  |
| Bacteria.Proteobacteria.Gammaproteobacteria.Pseudomonadales.unclassified_family                                     | 0           |  |
| Bacteria.Proteobacteria.Gammaproteobacteria.Pseudomonadales.unclassified_family.unclassified_genus                  | 0           |  |
| Bacteria.Proteobacteria.Gammaproteobacteria.Salinisphaerales                                                        | 0           |  |
| Bacteria.Proteobacteria.Gammaproteobacteria.Salinisphaerales.Salinisphaeraceae                                      | 0           |  |
| Bacteria.Proteobacteria.Gammaproteobacteria.Salinisphaerales.Salinisphaeraceae.Salinisphaera                        | 0           |  |
| Bacteria.Proteobacteria.Gammaproteobacteria.unclassified_order                                                      | 0           |  |
| Bacteria.Proteobacteria.Gammaproteobacteria.unclassified_order.unclassified_family                                  | 0           |  |
| Bacteria.Proteobacteria.Gammaproteobacteria.unclassified_order.unclassified_family.unclassified_genus               | 0           |  |
| Bacteria.Proteobacteria.Gammaproteobacteria.Vibrionales                                                             | 0           |  |
| Bacteria.Proteobacteria.Gammaproteobacteria.Vibrionales.Vibrionaceae                                                | 0           |  |
| Bacteria.Proteobacteria.Gammaproteobacteria.Vibrionales.Vibrionaceae.Photobacterium                                 | 0           |  |
| Bacteria.Proteobacteria.Gammaproteobacteria.Vibrionales.Vibrionaceae.unclassified_genus                             | 0           |  |
| Bacteria.Proteobacteria.Gammaproteobacteria.Vibrionales.Vibrionaceae.Vibrio                                         | 0           |  |
| Bacteria.Proteobacteria.Gammaproteobacteria.Xanthomonadales                                                         | 3.086716098 |  |
| Bacteria.Proteobacteria.Gammaproteobacteria.Xanthomonadales.Sinobacteraceae                                         | 0           |  |
| Bacteria.Proteobacteria.Gammaproteobacteria.Xanthomonadales.Sinobacteraceae.Steroidobacter                          | 0           |  |
| Bacteria.Proteobacteria.Gammaproteobacteria.Xanthomonadales.Xanthomonadaceae                                        | 3.086716098 |  |
| Bacteria.Proteobacteria.Gammaproteobacteria.Xanthomonadales.Xanthomonadaceae.Lysobacter                             | 0           |  |
| Bacteria.Proteobacteria.Gammaproteobacteria.Xanthomonadales.Xanthomonadaceae.Pseudoxanthomonas                      | 0           |  |
| Bacteria.Proteobacteria.Gammaproteobacteria.Xanthomonadales.Xanthomonadaceae.Stenotrophomonas                       | 3.086716098 |  |
| Bacteria.Proteobacteria.Gammaproteobacteria.Xanthomonadales.Xanthomonadaceae.unclassified_genus                     | 0           |  |
| Bacteria.Proteobacteria.Gammaproteobacteria.Xanthomonadales.Xanthomonadaceae.Wohlfahrtimonas                        | 0           |  |
| Bacteria.Proteobacteria.Gammaproteobacteria.Xanthomonadales.Xanthomonadaceae.Xanthomonas                            | 0           |  |
| Bacteria.Proteobacteria.unclassified_class                                                                          | 0           |  |
| Bacteria.Proteobacteria.unclassified_class.unclassified_order                                                       | 0           |  |
| Bacteria.Proteobacteria.unclassified_class.unclassified_order.unclassified_family                                   | 0           |  |
| Bacteria.Proteobacteria.unclassified_class.unclassified_order.unclassified_family.unclassified_genus                | 0           |  |
| Bacteria.Spirochaetes                                                                                               | 0           |  |
| Bacteria.Spirochaetes.Spirochaetes                                                                                  | 0           |  |
| Bacteria.Spirochaetes.Spirochaetes.Spirochaetales                                                                   | 0           |  |
| Bacteria.Spirochaetes.Spirochaetes.Spirochaetales.Spirochaetaceae                                                   | 0           |  |
| Bacteria.Spirochaetes.Spirochaetes.Spirochaetales.Spirochaetaceae.Treponema                                         | 0           |  |
| Bacteria.SR1                                                                                                        | 0           |  |
| Bacteria.SR1.SR1_genera_incertae_sedis                                                                              | 0           |  |
| Bacteria.SR1.SR1_genera_incertae_sedis.unclassified_order                                                           | 0           |  |
| Bacteria.SR1.SR1_genera_incertae_sedis.unclassified_order.unclassified_family                                       | 0           |  |
| Bacteria.SR1.SR1_genera_incertae_sedis.unclassified_order.unclassified_family.unclassified_genus                    | 0           |  |
| Bacteria.Synergistetes                                                                                              | 0           |  |
| Bacteria.Synergistetes.Synergistia                                                                                  | 0           |  |
| Bacteria.Synergistetes.Synergistia.Synergistales                                                                    | 0           |  |
| Bacteria.Synergistetes.Synergistia.Synergistales.Synergistaceae                                                     | 0           |  |
| Bacteria.Synergistetes.Synergistia.Synergistales.Synergistaceae.unclassified_genus                                  | 0           |  |
| Bacteria.Tenericutes                                                                                                | 0           |  |
| Bacteria.Tenericutes.Mollicutes                                                                                     | 0           |  |
| Bacteria.Tenericutes.Mollicutes.Anaeroplasmatales                                                                   | 0           |  |
| Bacteria.Tenericutes.Mollicutes.Anaeroplasmatales.Anaeroplasmataceae                                                | 0           |  |
| Bacteria.Tenericutes.Mollicutes.Anaeroplasmatales.Anaeroplasmataceae.Anaeroplasma                                   | 0           |  |
| Bacteria.Tenericutes.Mollicutes.Mycoplasmatales                                                                     | 0           |  |
| Bacteria.Tenericutes.Mollicutes.Mycoplasmatales.Mycoplasmataceae                                                    | 0           |  |
| Bacteria.Tenericutes.Mollicutes.Mycoplasmatales.Mycoplasmataceae.Mycoplasma                                         | 0           |  |
| Bacteria.TM7                                                                                                        | 0           |  |
| Bacteria.TM7.TM7_genera_incertae_sedis                                                                              | 0           |  |
| Bacteria.TM7.TM7_genera_incertae_sedis.unclassified_order                                                           | 0           |  |
| Bacteria.TM7.TM7_genera_incertae_sedis.unclassified_order.unclassified_family                                       | 0           |  |
| Bacteria.TM7.TM7_genera_incertae_sedis.unclassified_order.unclassified_family.unclassified_genus                    | 0           |  |
| Bacteria.unclassified_phylum                                                                                        | 4.293861782 |  |
| Bacteria.unclassified_phylum.unclassified_class                                                                     | 4.293861782 |  |
| Bacteria.unclassified_phylum.unclassified_class.unclassified_order                                                  | 4.293861782 |  |
| Bacteria.unclassified_phylum.unclassified_class.unclassified_order.unclassified_family                              | 4.293861782 |  |
| Bacteria.unclassified_phylum.unclassified_class.unclassified_order.unclassified_family.unclassified_genus           | 4.293861782 |  |
| Bacteria.Verrucomicrobia                                                                                            | 0           |  |
| Bacteria.Verrucomicrobia.Opitutae                                                                                   | 0           |  |
| Bacteria.Verrucomicrobia.Opitutae.Opitutales                                                                        | 0           |  |
| Bacteria.Verrucomicrobia.Opitutae.Opitutales.Opitutaceae                                                            | 0           |  |
| Bacteria.Verrucomicrobia.Opitutae.Opitutales.Opitutaceae.Opitutus                                                   | 0           |  |
| Bacteria.Verrucomicrobia.Spartobacteria                                                                             | 0           |  |
| Bacteria.Verrucomicrobia.Spartobacteria.Spartobacteria_genera_incertae_sedis                                        | 0           |  |
| Bacteria.Verrucomicrobia.Spartobacteria.Spartobacteria_genera_incertae_sedis.unclassified_family                    | 0           |  |
| Bacteria.Verrucomicrobia.Spartobacteria.Spartobacteria_genera_incertae_sedis.unclassified_family.unclassified_genus | 0           |  |
| Bacteria.Verrucomicrobia.unclassified_class                                                                         | 0           |  |
| Bacteria.Verrucomicrobia.unclassified_class.unclassified_order                                                      | 0           |  |
| Bacteria.Verrucomicrobia.unclassified_class.unclassified_order.unclassified_family                                  | 0           |  |
| Bacteria.Verrucomicrobia.unclassified_class.unclassified_order.unclassified_family.unclassified_genus               | 0           |  |
| Bacteria.Verrucomicrobia.Verrucomicrobiae                                                                           | 0           |  |
| Bacteria.Verrucomicrobia.Verrucomicrobiae.Verrucomicrobiales                                                        | 0           |  |
| Bacteria.Verrucomicrobia.Verrucomicrobiae.Verrucomicrobiales.Verrucomicrobiaceae                                    | 0           |  |
| Bacteria.Verrucomicrobia.Verrucomicrobiae.Verrucomicrobiales.Verrucomicrobiaceae.Akkermansia                        | 0           |  |

Footnotes:

1. Taxonomic assignment determined using RDP classifier to compare a representative sequence from each OTU to reference sequences in the greengenes database.

Table S19. LEfSe comparison of grain-based, high density against grain-based, low density

| Taxon <sup>1</sup>                                                                                     | Log10 [(mean relative abundance) x (10 <sup>6</sup> )] from group with higher relative abundance of taxon | Group with significantly higher logarithmic LDA score | Logarithmic LDA score of higher-scoring group |
|--------------------------------------------------------------------------------------------------------|-----------------------------------------------------------------------------------------------------------|-------------------------------------------------------|-----------------------------------------------|
| Bacteria                                                                                               | 6                                                                                                         |                                                       |                                               |
| Bacteria_Acidobacteria                                                                                 | 0                                                                                                         |                                                       |                                               |
| Bacteria_Acidobacteria_Acidobacteria_Gp1                                                               | 0                                                                                                         |                                                       |                                               |
| Bacteria_Acidobacteria_Acidobacteria_Gp1_Gp1                                                           | 0                                                                                                         |                                                       |                                               |
| Bacteria_Acidobacteria_Acidobacteria_Gp1_Gp1_unclassified_family                                       | 0                                                                                                         |                                                       |                                               |
| Bacteria_Acidobacteria_Acidobacteria_Gp1_Gp1_unclassified_family_unclassified_genus                    | 0                                                                                                         |                                                       |                                               |
| Bacteria_Acidobacteria_Acidobacteria_Gp16                                                              | 0                                                                                                         |                                                       |                                               |
| Bacteria_Acidobacteria_Acidobacteria_Gp16_Gp16                                                         | 0                                                                                                         |                                                       |                                               |
| Bacteria_Acidobacteria_Acidobacteria_Gp16_Gp16_unclassified_family                                     | 0                                                                                                         |                                                       |                                               |
| Bacteria_Acidobacteria_Acidobacteria_Gp16_Gp16_unclassified_family_unclassified_genus                  | 0                                                                                                         |                                                       |                                               |
| Bacteria_Acidobacteria_Acidobacteria_Gp2                                                               | 0                                                                                                         |                                                       |                                               |
| Bacteria_Acidobacteria_Acidobacteria_Gp2_Gp2                                                           | 0                                                                                                         |                                                       |                                               |
| Bacteria_Acidobacteria_Acidobacteria_Gp2_Gp2_unclassified_family                                       | 0                                                                                                         |                                                       |                                               |
| Bacteria_Acidobacteria_Acidobacteria_Gp2_Gp2_unclassified_family_unclassified_genus                    | 0                                                                                                         |                                                       |                                               |
| Bacteria_Acidobacteria_Acidobacteria_Gp3                                                               | 0                                                                                                         |                                                       |                                               |
| Bacteria_Acidobacteria_Acidobacteria_Gp3_Gp3                                                           | 0                                                                                                         |                                                       |                                               |
| Bacteria_Acidobacteria_Acidobacteria_Gp3_Gp3_unclassified_family                                       | 0                                                                                                         |                                                       |                                               |
| Bacteria_Acidobacteria_Acidobacteria_Gp3_Gp3_unclassified_family_unclassified_genus                    | 0                                                                                                         |                                                       |                                               |
| Bacteria_Acidobacteria_Acidobacteria_Gp4                                                               | 0                                                                                                         |                                                       |                                               |
| Bacteria_Acidobacteria_Acidobacteria_Gp4_Gp4                                                           | 0                                                                                                         |                                                       |                                               |
| Bacteria_Acidobacteria_Acidobacteria_Gp4_Gp4_unclassified_family                                       | 0                                                                                                         |                                                       |                                               |
| Bacteria_Acidobacteria_Acidobacteria_Gp4_Gp4_unclassified_family_unclassified_genus                    | 0                                                                                                         |                                                       |                                               |
| Bacteria_Acidobacteria_Acidobacteria_Gp5                                                               | 0                                                                                                         |                                                       |                                               |
| Bacteria_Acidobacteria_Acidobacteria_Gp5_Gp5                                                           | 0                                                                                                         |                                                       |                                               |
| Bacteria_Acidobacteria_Acidobacteria_Gp5_Gp5_unclassified_family                                       | 0                                                                                                         |                                                       |                                               |
| Bacteria_Acidobacteria_Acidobacteria_Gp5_Gp5_unclassified_family_unclassified_genus                    | 0                                                                                                         |                                                       |                                               |
| Bacteria_Acidobacteria_Acidobacteria_Gp6                                                               | 0                                                                                                         |                                                       |                                               |
| Bacteria_Acidobacteria_Acidobacteria_Gp6_Gp6                                                           | 0                                                                                                         |                                                       |                                               |
| Bacteria_Acidobacteria_Acidobacteria_Gp6_Gp6_unclassified_family                                       | 0                                                                                                         |                                                       |                                               |
| Bacteria_Acidobacteria_Acidobacteria_Gp6_Gp6_unclassified_family_unclassified_genus                    | 0                                                                                                         |                                                       |                                               |
| Bacteria_Acidobacteria_Acidobacteria_Gp7                                                               | 0                                                                                                         |                                                       |                                               |
| Bacteria_Acidobacteria_Acidobacteria_Gp7_Gp7                                                           | 0                                                                                                         |                                                       |                                               |
| Bacteria_Acidobacteria_Acidobacteria_Gp7_Gp7_unclassified_family                                       | 0                                                                                                         |                                                       |                                               |
| Bacteria_Acidobacteria_Acidobacteria_Gp7_Gp7_unclassified_family_unclassified_genus                    | 0                                                                                                         |                                                       |                                               |
| Bacteria_Actinobacteria                                                                                | 3.101274818                                                                                               |                                                       |                                               |
| Bacteria_Actinobacteria_Actinobacteria                                                                 | 3.101274818                                                                                               |                                                       |                                               |
| Bacteria_Actinobacteria_Actinobacteria_Acidimicrobiales                                                | 0                                                                                                         |                                                       |                                               |
| Bacteria_Actinobacteria_Actinobacteria_Acidimicrobiales_Acidimicrobiaceae                              | 0                                                                                                         |                                                       |                                               |
| Bacteria_Actinobacteria_Actinobacteria_Acidimicrobiales_Acidimicrobiaceae_unclassified_genus           | 0                                                                                                         |                                                       |                                               |
| Bacteria_Actinobacteria_Actinobacteria_Acidimicrobiales_lamiaceae                                      | 0                                                                                                         |                                                       |                                               |
| Bacteria_Actinobacteria_Actinobacteria_Acidimicrobiales_lamiaceae_lamia                                | 0                                                                                                         |                                                       |                                               |
| Bacteria_Actinobacteria_Actinobacteria_Acidimicrobiales_incertae_sedis                                 | 0                                                                                                         |                                                       |                                               |
| Bacteria_Actinobacteria_Actinobacteria_Acidimicrobiales_incertae_sedis_lumatobacter                    | 0                                                                                                         |                                                       |                                               |
| Bacteria_Actinobacteria_Actinobacteria_Acidimicrobiales_incertae_sedis_lumatobacter_unclassified_genus | 0                                                                                                         |                                                       |                                               |
| Bacteria_Actinobacteria_Actinobacteria_Actinomycetales                                                 | 3.101274818                                                                                               |                                                       |                                               |
| Bacteria_Actinobacteria_Actinobacteria_Actinomycetales_Actinomycetaceae                                | 0                                                                                                         |                                                       |                                               |
| Bacteria_Actinobacteria_Actinobacteria_Actinomycetales_Actinomycetaceae_Actinomycetes                  | 0                                                                                                         |                                                       |                                               |
| Bacteria_Actinobacteria_Actinobacteria_Actinomycetales_Actinomycetaceae_Arcanobacterium                | 0                                                                                                         |                                                       |                                               |
| Bacteria_Actinobacteria_Actinobacteria_Actinomycetales_Actinomycetaceae_unclassified_genus             | 0                                                                                                         |                                                       |                                               |
| Bacteria_Actinobacteria_Actinobacteria_Actinomycetales_Beutenbergiaceae                                | 0                                                                                                         |                                                       |                                               |
| Bacteria_Actinobacteria_Actinobacteria_Actinomycetales_Beutenbergiaceae_Salana                         | 0                                                                                                         |                                                       |                                               |
| Bacteria_Actinobacteria_Actinobacteria_Actinomycetales_Beutenbergiaceae_Serinebacter                   | 0                                                                                                         |                                                       |                                               |
| Bacteria_Actinobacteria_Actinobacteria_Actinomycetales_Bogoriellaceae                                  | 0                                                                                                         |                                                       |                                               |
| Bacteria_Actinobacteria_Actinobacteria_Actinomycetales_Bogoriellaceae_Georgia                          | 0                                                                                                         |                                                       |                                               |
| Bacteria_Actinobacteria_Actinobacteria_Actinomycetales_Bogoriellaceae_unclassified_genus               | 0                                                                                                         |                                                       |                                               |
| Bacteria_Actinobacteria_Actinobacteria_Actinomycetales_Brevibacteriaceae                               | 0                                                                                                         |                                                       |                                               |
| Bacteria_Actinobacteria_Actinobacteria_Actinomycetales_Brevibacteriaceae_Brevibacterium                | 0                                                                                                         |                                                       |                                               |
| Bacteria_Actinobacteria_Actinobacteria_Actinomycetales_Cellulomonadaceae                               | 0                                                                                                         |                                                       |                                               |
| Bacteria_Actinobacteria_Actinobacteria_Actinomycetales_Cellulomonadaceae_Cellulomonas                  | 0                                                                                                         |                                                       |                                               |
| Bacteria_Actinobacteria_Actinobacteria_Actinomycetales_Cellulomonadaceae_unclassified_genus            | 0                                                                                                         |                                                       |                                               |
| Bacteria_Actinobacteria_Actinobacteria_Actinomycetales_Corynebacteriaceae                              | 0                                                                                                         |                                                       |                                               |
| Bacteria_Actinobacteria_Actinobacteria_Actinomycetales_Corynebacteriaceae_Corynebacterium              | 0                                                                                                         |                                                       |                                               |
| Bacteria_Actinobacteria_Actinobacteria_Actinomycetales_Corynebacteriaceae_Turicella                    | 0                                                                                                         |                                                       |                                               |
| Bacteria_Actinobacteria_Actinobacteria_Actinomycetales_Corynebacteriaceae_unclassified_genus           | 0                                                                                                         |                                                       |                                               |
| Bacteria_Actinobacteria_Actinobacteria_Actinomycetales_Dermabacteriaceae                               | 0                                                                                                         |                                                       |                                               |
| Bacteria_Actinobacteria_Actinobacteria_Actinomycetales_Dermabacteriaceae_Brachybacterium               | 0                                                                                                         |                                                       |                                               |
| Bacteria_Actinobacteria_Actinobacteria_Actinomycetales_Dermacoccaceae                                  | 0                                                                                                         |                                                       |                                               |
| Bacteria_Actinobacteria_Actinobacteria_Actinomycetales_Dermacoccaceae_Dermacoccus                      | 0                                                                                                         |                                                       |                                               |
| Bacteria_Actinobacteria_Actinobacteria_Actinomycetales_Dietziaceae                                     | 0                                                                                                         |                                                       |                                               |
| Bacteria_Actinobacteria_Actinobacteria_Actinomycetales_Dietziaceae_Dietzia                             | 0                                                                                                         |                                                       |                                               |
| Bacteria_Actinobacteria_Actinobacteria_Actinomycetales_Geodermatophilaceae                             | 0                                                                                                         |                                                       |                                               |
| Bacteria_Actinobacteria_Actinobacteria_Actinomycetales_Geodermatophilaceae_Blastococcus                | 0                                                                                                         |                                                       |                                               |
| Bacteria_Actinobacteria_Actinobacteria_Actinomycetales_Geodermatophilaceae_unclassified_genus          | 0                                                                                                         |                                                       |                                               |
| Bacteria_Actinobacteria_Actinobacteria_Actinomycetales_Intrasporangiaceae                              | 0                                                                                                         |                                                       |                                               |
| Bacteria_Actinobacteria_Actinobacteria_Actinomycetales_Intrasporangiaceae_Janibacter                   | 0                                                                                                         |                                                       |                                               |
| Bacteria_Actinobacteria_Actinobacteria_Actinomycetales_Intrasporangiaceae_Knoellia                     | 0                                                                                                         |                                                       |                                               |
| Bacteria_Actinobacteria_Actinobacteria_Actinomycetales_Intrasporangiaceae_Omithinimicrobium            | 0                                                                                                         |                                                       |                                               |
| Bacteria_Actinobacteria_Actinobacteria_Actinomycetales_Intrasporangiaceae_Tetrasphaera                 | 0                                                                                                         |                                                       |                                               |
| Bacteria_Actinobacteria_Actinobacteria_Actinomycetales_Intrasporangiaceae_unclassified_genus           | 0                                                                                                         |                                                       |                                               |
| Bacteria_Actinobacteria_Actinobacteria_Actinomycetales_Jonesiaceae                                     | 0                                                                                                         |                                                       |                                               |
| Bacteria_Actinobacteria_Actinobacteria_Actinomycetales_Jonesiaceae_Jonesia                             | 0                                                                                                         |                                                       |                                               |
| Bacteria_Actinobacteria_Actinobacteria_Actinomycetales_Microbacteriaceae                               | 0                                                                                                         |                                                       |                                               |
| Bacteria_Actinobacteria_Actinobacteria_Actinomycetales_Microbacteriaceae_Agrococcus                    | 0                                                                                                         |                                                       |                                               |
| Bacteria_Actinobacteria_Actinobacteria_Actinomycetales_Microbacteriaceae_Clavibacter                   | 0                                                                                                         |                                                       |                                               |
| Bacteria_Actinobacteria_Actinobacteria_Actinomycetales_Microbacteriaceae_Curtobacterium                | 0                                                                                                         |                                                       |                                               |
| Bacteria_Actinobacteria_Actinobacteria_Actinomycetales_Microbacteriaceae_Frigoribacterium              | 0                                                                                                         |                                                       |                                               |
| Bacteria_Actinobacteria_Actinobacteria_Actinomycetales_Microbacteriaceae_Leifsonia                     | 0                                                                                                         |                                                       |                                               |
| Bacteria_Actinobacteria_Actinobacteria_Actinomycetales_Microbacteriaceae_Leucobacter                   | 0                                                                                                         |                                                       |                                               |
| Bacteria_Actinobacteria_Actinobacteria_Actinomycetales_Microbacteriaceae_Microbacterium                | 0                                                                                                         |                                                       |                                               |
| Bacteria_Actinobacteria_Actinobacteria_Actinomycetales_Microbacteriaceae_Plantibacter                  | 0                                                                                                         |                                                       |                                               |
| Bacteria_Actinobacteria_Actinobacteria_Actinomycetales_Microbacteriaceae_Pseudoclavibacter             | 0                                                                                                         |                                                       |                                               |
| Bacteria_Actinobacteria_Actinobacteria_Actinomycetales_Microbacteriaceae_unclassified_genus            | 0                                                                                                         |                                                       |                                               |

|                                                                                                    |             |  |  |
|----------------------------------------------------------------------------------------------------|-------------|--|--|
| Bacteria.Actinobacteria.Actinobacteria.Actinomycetales.Micrococcaceae                              | 3.101274818 |  |  |
| Bacteria.Actinobacteria.Actinobacteria.Actinomycetales.Micrococcaceae.Arthrobacter                 | 3.101274818 |  |  |
| Bacteria.Actinobacteria.Actinobacteria.Actinomycetales.Micrococcaceae.Kocuria                      | 0           |  |  |
| Bacteria.Actinobacteria.Actinobacteria.Actinomycetales.Micrococcaceae.Micrococcus                  | 0           |  |  |
| Bacteria.Actinobacteria.Actinobacteria.Actinomycetales.Micrococcaceae.Nesterenkonia                | 0           |  |  |
| Bacteria.Actinobacteria.Actinobacteria.Actinomycetales.Micrococcaceae.Rothia                       | 0           |  |  |
| Bacteria.Actinobacteria.Actinobacteria.Actinomycetales.Micrococcaceae.unclassified_genus           | 0           |  |  |
| Bacteria.Actinobacteria.Actinobacteria.Actinomycetales.Micromonosporaceae                          | 0           |  |  |
| Bacteria.Actinobacteria.Actinobacteria.Actinomycetales.Micromonosporaceae.Luedemannella            | 0           |  |  |
| Bacteria.Actinobacteria.Actinobacteria.Actinomycetales.Micromonosporaceae.Micromonospora           | 0           |  |  |
| Bacteria.Actinobacteria.Actinobacteria.Actinomycetales.Mycobacteriaceae                            | 0           |  |  |
| Bacteria.Actinobacteria.Actinobacteria.Actinomycetales.Mycobacteriaceae.Mycobacterium              | 0           |  |  |
| Bacteria.Actinobacteria.Actinobacteria.Actinomycetales.Nocardiaceae                                | 0           |  |  |
| Bacteria.Actinobacteria.Actinobacteria.Actinomycetales.Nocardiaceae.Gordonia                       | 0           |  |  |
| Bacteria.Actinobacteria.Actinobacteria.Actinomycetales.Nocardiaceae.Rhodococcus                    | 0           |  |  |
| Bacteria.Actinobacteria.Actinobacteria.Actinomycetales.Nocardiaceae.unclassified_genus             | 0           |  |  |
| Bacteria.Actinobacteria.Actinobacteria.Actinomycetales.Nocardiaceae.Williamsia                     | 0           |  |  |
| Bacteria.Actinobacteria.Actinobacteria.Actinomycetales.Nocardioidaceae                             | 0           |  |  |
| Bacteria.Actinobacteria.Actinobacteria.Actinomycetales.Nocardioidaceae.Aeromicrobium               | 0           |  |  |
| Bacteria.Actinobacteria.Actinobacteria.Actinomycetales.Nocardioidaceae.Marmoricola                 | 0           |  |  |
| Bacteria.Actinobacteria.Actinobacteria.Actinomycetales.Nocardioidaceae.Nocardioides                | 0           |  |  |
| Bacteria.Actinobacteria.Actinobacteria.Actinomycetales.Nocardioidaceae.Pimelobacter                | 0           |  |  |
| Bacteria.Actinobacteria.Actinobacteria.Actinomycetales.Nocardioidaceae.unclassified_genus          | 0           |  |  |
| Bacteria.Actinobacteria.Actinobacteria.Actinomycetales.Nocardiopsaceae                             | 0           |  |  |
| Bacteria.Actinobacteria.Actinobacteria.Actinomycetales.Nocardiopsaceae.Nocardiopsis                | 0           |  |  |
| Bacteria.Actinobacteria.Actinobacteria.Actinomycetales.Nocardiopsaceae.unclassified_genus          | 0           |  |  |
| Bacteria.Actinobacteria.Actinobacteria.Actinomycetales.Propionibacteriaceae                        | 0           |  |  |
| Bacteria.Actinobacteria.Actinobacteria.Actinomycetales.Propionibacteriaceae.Friedmanniella         | 0           |  |  |
| Bacteria.Actinobacteria.Actinobacteria.Actinomycetales.Propionibacteriaceae.Microlunatus           | 0           |  |  |
| Bacteria.Actinobacteria.Actinobacteria.Actinomycetales.Propionibacteriaceae.Propionibacterium      | 0           |  |  |
| Bacteria.Actinobacteria.Actinobacteria.Actinomycetales.Propionibacteriaceae.unclassified_genus     | 0           |  |  |
| Bacteria.Actinobacteria.Actinobacteria.Actinomycetales.Pseudonocardiaceae                          | 0           |  |  |
| Bacteria.Actinobacteria.Actinobacteria.Actinomycetales.Pseudonocardiaceae.Pseudonocardia           | 0           |  |  |
| Bacteria.Actinobacteria.Actinobacteria.Actinomycetales.Pseudonocardiaceae.Saccharopolyspora        | 0           |  |  |
| Bacteria.Actinobacteria.Actinobacteria.Actinomycetales.Pseudonocardiaceae.unclassified_genus       | 0           |  |  |
| Bacteria.Actinobacteria.Actinobacteria.Actinomycetales.Sanguibacteraceae                           | 0           |  |  |
| Bacteria.Actinobacteria.Actinobacteria.Actinomycetales.Sanguibacteraceae.Sanguibacter              | 0           |  |  |
| Bacteria.Actinobacteria.Actinobacteria.Actinomycetales.Streptomycetaceae                           | 0           |  |  |
| Bacteria.Actinobacteria.Actinobacteria.Actinomycetales.Streptomycetaceae.Streptomyces              | 0           |  |  |
| Bacteria.Actinobacteria.Actinobacteria.Actinomycetales.Streptomycetaceae.unclassified_genus        | 0           |  |  |
| Bacteria.Actinobacteria.Actinobacteria.Actinomycetales.unclassified_family                         | 0           |  |  |
| Bacteria.Actinobacteria.Actinobacteria.Actinomycetales.unclassified_family.unclassified_genus      | 0           |  |  |
| Bacteria.Actinobacteria.Actinobacteria.Actinomycetales.Yaniellaceae                                | 0           |  |  |
| Bacteria.Actinobacteria.Actinobacteria.Actinomycetales.Yaniellaceae.Yaniella                       | 0           |  |  |
| Bacteria.Actinobacteria.Actinobacteria.Bifidobacteriales                                           | 0           |  |  |
| Bacteria.Actinobacteria.Actinobacteria.Bifidobacteriales.Bifidobacteriaceae                        | 0           |  |  |
| Bacteria.Actinobacteria.Actinobacteria.Bifidobacteriales.Bifidobacteriaceae.Aeriscardovia          | 0           |  |  |
| Bacteria.Actinobacteria.Actinobacteria.Bifidobacteriales.Bifidobacteriaceae.Bifidobacterium        | 0           |  |  |
| Bacteria.Actinobacteria.Actinobacteria.Bifidobacteriales.Bifidobacteriaceae.unclassified_genus     | 0           |  |  |
| Bacteria.Actinobacteria.Actinobacteria.Coriobacteriales                                            | 0           |  |  |
| Bacteria.Actinobacteria.Actinobacteria.Coriobacteriales.Coriobacteriaceae                          | 0           |  |  |
| Bacteria.Actinobacteria.Actinobacteria.Coriobacteriales.Coriobacteriaceae.Asaccharobacter          | 0           |  |  |
| Bacteria.Actinobacteria.Actinobacteria.Coriobacteriales.Coriobacteriaceae.Atopobium                | 0           |  |  |
| Bacteria.Actinobacteria.Actinobacteria.Coriobacteriales.Coriobacteriaceae.Collinsella              | 0           |  |  |
| Bacteria.Actinobacteria.Actinobacteria.Coriobacteriales.Coriobacteriaceae.Eggerthella              | 0           |  |  |
| Bacteria.Actinobacteria.Actinobacteria.Coriobacteriales.Coriobacteriaceae.Olsenella                | 0           |  |  |
| Bacteria.Actinobacteria.Actinobacteria.Coriobacteriales.Coriobacteriaceae.Paraeggerthella          | 0           |  |  |
| Bacteria.Actinobacteria.Actinobacteria.Coriobacteriales.Coriobacteriaceae.unclassified_genus       | 0           |  |  |
| Bacteria.Actinobacteria.Actinobacteria.Rubrobacteriales                                            | 0           |  |  |
| Bacteria.Actinobacteria.Actinobacteria.Rubrobacteriales.Rubrobacteraceae                           | 0           |  |  |
| Bacteria.Actinobacteria.Actinobacteria.Rubrobacteriales.Rubrobacteraceae.Rubrobacter               | 0           |  |  |
| Bacteria.Actinobacteria.Actinobacteria.Solirubrobacteriales                                        | 0           |  |  |
| Bacteria.Actinobacteria.Actinobacteria.Solirubrobacteriales.Conexibacteraceae                      | 0           |  |  |
| Bacteria.Actinobacteria.Actinobacteria.Solirubrobacteriales.Conexibacteraceae.Conexibacter         | 0           |  |  |
| Bacteria.Actinobacteria.Actinobacteria.Solirubrobacteriales.Solirubrobacteraceae                   | 0           |  |  |
| Bacteria.Actinobacteria.Actinobacteria.Solirubrobacteriales.Solirubrobacteraceae.Solirubrobacter   | 0           |  |  |
| Bacteria.Actinobacteria.Actinobacteria.Solirubrobacteriales.unclassified_family                    | 0           |  |  |
| Bacteria.Actinobacteria.Actinobacteria.Solirubrobacteriales.unclassified_family.unclassified_genus | 0           |  |  |
| Bacteria.Actinobacteria.Actinobacteria.unclassified_order                                          | 0           |  |  |
| Bacteria.Actinobacteria.Actinobacteria.unclassified_order.unclassified_family                      | 0           |  |  |
| Bacteria.Actinobacteria.Actinobacteria.unclassified_order.unclassified_family.unclassified_genus   | 0           |  |  |
| Bacteria.Aquificae                                                                                 | 0           |  |  |
| Bacteria.Aquificae.Aquificae                                                                       | 0           |  |  |
| Bacteria.Aquificae.Aquificae.Aquificales                                                           | 0           |  |  |
| Bacteria.Aquificae.Aquificae.Aquificales.Hydrogenothermaceae                                       | 0           |  |  |
| Bacteria.Aquificae.Aquificae.Aquificales.Hydrogenothermaceae.Sulfurihydrogenibium                  | 0           |  |  |
| Bacteria.Bacteroidetes                                                                             | 4.39801795  |  |  |
| Bacteria.Bacteroidetes.Bacteroidia                                                                 | 3.081969663 |  |  |
| Bacteria.Bacteroidetes.Bacteroidia.Bacteroidales                                                   | 3.081969663 |  |  |
| Bacteria.Bacteroidetes.Bacteroidia.Bacteroidales.Bacteroidaceae                                    | 3.081969663 |  |  |
| Bacteria.Bacteroidetes.Bacteroidia.Bacteroidales.Bacteroidaceae.Bacteroides                        | 3.081969663 |  |  |
| Bacteria.Bacteroidetes.Bacteroidia.Bacteroidales.Porphyrionadaceae                                 | 0           |  |  |
| Bacteria.Bacteroidetes.Bacteroidia.Bacteroidales.Porphyrionadaceae.Dysgonomonas                    | 0           |  |  |
| Bacteria.Bacteroidetes.Bacteroidia.Bacteroidales.Porphyrionadaceae.Porphyrionas                    | 0           |  |  |
| Bacteria.Bacteroidetes.Bacteroidia.Bacteroidales.Porphyrionadaceae.Proteiniphilum                  | 0           |  |  |
| Bacteria.Bacteroidetes.Bacteroidia.Bacteroidales.Porphyrionadaceae.unclassified_genus              | 0           |  |  |
| Bacteria.Bacteroidetes.Bacteroidia.Bacteroidales.Prevotellaceae                                    | 0           |  |  |
| Bacteria.Bacteroidetes.Bacteroidia.Bacteroidales.Prevotellaceae.Hallella                           | 0           |  |  |
| Bacteria.Bacteroidetes.Bacteroidia.Bacteroidales.Prevotellaceae.Prevotella                         | 0           |  |  |
| Bacteria.Bacteroidetes.Bacteroidia.Bacteroidales.Prevotellaceae.unclassified_genus                 | 0           |  |  |
| Bacteria.Bacteroidetes.Bacteroidia.Bacteroidales.unclassified_family                               | 0           |  |  |
| Bacteria.Bacteroidetes.Bacteroidia.Bacteroidales.unclassified_family.unclassified_genus            | 0           |  |  |
| Bacteria.Bacteroidetes.Flavobacteria                                                               | 4.280023713 |  |  |
| Bacteria.Bacteroidetes.Flavobacteria.Flavobacteriales                                              | 4.280023713 |  |  |
| Bacteria.Bacteroidetes.Flavobacteria.Flavobacteriales.Cryomorphaceae                               | 0           |  |  |
| Bacteria.Bacteroidetes.Flavobacteria.Flavobacteriales.Cryomorphaceae.Fluvicola                     | 0           |  |  |
| Bacteria.Bacteroidetes.Flavobacteria.Flavobacteriales.Flavobacteriaceae                            | 4.280023713 |  |  |
| Bacteria.Bacteroidetes.Flavobacteria.Flavobacteriales.Flavobacteriaceae.Capnocytophaga             | 0           |  |  |
| Bacteria.Bacteroidetes.Flavobacteria.Flavobacteriales.Flavobacteriaceae.Chryseobacterium           | 4.037422441 |  |  |
| Bacteria.Bacteroidetes.Flavobacteria.Flavobacteriales.Flavobacteriaceae.Cloacibacterium            | 3.851591741 |  |  |
| Bacteria.Bacteroidetes.Flavobacteria.Flavobacteriales.Flavobacteriaceae.Flavobacterium             | 3.077274542 |  |  |
| Bacteria.Bacteroidetes.Flavobacteria.Flavobacteriales.Flavobacteriaceae.Myroides                   | 0           |  |  |

|                                                                                                     |             |  |
|-----------------------------------------------------------------------------------------------------|-------------|--|
| Bacteria.Bacteroidetes.Flavobacteria.Flavobacteriales.Flavobacteriaceae.Riemerella                  | 0           |  |
| Bacteria.Bacteroidetes.Flavobacteria.Flavobacteriales.Flavobacteriaceae.Salinimicrobium             | 0           |  |
| Bacteria.Bacteroidetes.Flavobacteria.Flavobacteriales.Flavobacteriaceae.unclassified_genus          | 0           |  |
| Bacteria.Bacteroidetes.Flavobacteria.Flavobacteriales.Flavobacteriaceae.Wautersiella                | 0           |  |
| Bacteria.Bacteroidetes.Flavobacteria.Flavobacteriales.unclassified_family                           | 0           |  |
| Bacteria.Bacteroidetes.Flavobacteria.Flavobacteriales.unclassified_family.unclassified_genus        | 0           |  |
| Bacteria.Bacteroidetes.Sphingobacteria                                                              | 3.675880032 |  |
| Bacteria.Bacteroidetes.Sphingobacteria.Sphingobacteriales                                           | 3.675880032 |  |
| Bacteria.Bacteroidetes.Sphingobacteria.Sphingobacteriales.Chitinophagaceae                          | 0           |  |
| Bacteria.Bacteroidetes.Sphingobacteria.Sphingobacteriales.Chitinophagaceae.Ferruginibacter          | 0           |  |
| Bacteria.Bacteroidetes.Sphingobacteria.Sphingobacteriales.Chitinophagaceae.Filimonas                | 0           |  |
| Bacteria.Bacteroidetes.Sphingobacteria.Sphingobacteriales.Chitinophagaceae.Flavisolibacter          | 0           |  |
| Bacteria.Bacteroidetes.Sphingobacteria.Sphingobacteriales.Chitinophagaceae.unclassified_genus       | 0           |  |
| Bacteria.Bacteroidetes.Sphingobacteria.Sphingobacteriales.Cytophagaceae                             | 3.675880032 |  |
| Bacteria.Bacteroidetes.Sphingobacteria.Sphingobacteriales.Cytophagaceae.Adhaeribacter               | 0           |  |
| Bacteria.Bacteroidetes.Sphingobacteria.Sphingobacteriales.Cytophagaceae.Cytophaga                   | 0           |  |
| Bacteria.Bacteroidetes.Sphingobacteria.Sphingobacteriales.Cytophagaceae.Dvadobacter                 | 0           |  |
| Bacteria.Bacteroidetes.Sphingobacteria.Sphingobacteriales.Cytophagaceae.Ermicicia                   | 0           |  |
| Bacteria.Bacteroidetes.Sphingobacteria.Sphingobacteriales.Cytophagaceae.Flectobacillus              | 3.675880032 |  |
| Bacteria.Bacteroidetes.Sphingobacteria.Sphingobacteriales.Cytophagaceae.Hymenobacter                | 0           |  |
| Bacteria.Bacteroidetes.Sphingobacteria.Sphingobacteriales.Cytophagaceae.Pontibacter                 | 0           |  |
| Bacteria.Bacteroidetes.Sphingobacteria.Sphingobacteriales.Cytophagaceae.Runella                     | 0           |  |
| Bacteria.Bacteroidetes.Sphingobacteria.Sphingobacteriales.Cytophagaceae.Sporocytophaga              | 0           |  |
| Bacteria.Bacteroidetes.Sphingobacteria.Sphingobacteriales.Cytophagaceae.unclassified_genus          | 0           |  |
| Bacteria.Bacteroidetes.Sphingobacteria.Sphingobacteriales.Sphingobacteriaceae                       | 3.101274818 |  |
| Bacteria.Bacteroidetes.Sphingobacteria.Sphingobacteriales.Sphingobacteriaceae.Nubsella              | 0           |  |
| Bacteria.Bacteroidetes.Sphingobacteria.Sphingobacteriales.Sphingobacteriaceae.Pedobacter            | 0           |  |
| Bacteria.Bacteroidetes.Sphingobacteria.Sphingobacteriales.Sphingobacteriaceae.Sphingobacterium      | 3.101274818 |  |
| Bacteria.Bacteroidetes.Sphingobacteria.Sphingobacteriales.Sphingobacteriaceae.unclassified_genus    | 0           |  |
| Bacteria.Bacteroidetes.Sphingobacteria.Sphingobacteriales.unclassified_family                       | 0           |  |
| Bacteria.Bacteroidetes.Sphingobacteria.Sphingobacteriales.unclassified_family.unclassified_genus    | 0           |  |
| Bacteria.Bacteroidetes.unclassified_class                                                           | 0           |  |
| Bacteria.Bacteroidetes.unclassified_class.unclassified_order                                        | 0           |  |
| Bacteria.Bacteroidetes.unclassified_class.unclassified_order.unclassified_family                    | 0           |  |
| Bacteria.Bacteroidetes.unclassified_class.unclassified_order.unclassified_family.unclassified_genus | 0           |  |
| Bacteria.Chloroflexi                                                                                | 0           |  |
| Bacteria.Chloroflexi.Anaerolineae                                                                   | 0           |  |
| Bacteria.Chloroflexi.Anaerolineae.Anaerolineales                                                    | 0           |  |
| Bacteria.Chloroflexi.Anaerolineae.Anaerolineales.Anaerolineaceae                                    | 0           |  |
| Bacteria.Chloroflexi.Anaerolineae.Anaerolineales.Anaerolineaceae.unclassified_genus                 | 0           |  |
| Bacteria.Chloroflexi.Caldiilineae                                                                   | 0           |  |
| Bacteria.Chloroflexi.Caldiilineae.Caldiilineales                                                    | 0           |  |
| Bacteria.Chloroflexi.Caldiilineae.Caldiilineales.Caldiilineaceae                                    | 0           |  |
| Bacteria.Chloroflexi.Caldiilineae.Caldiilineales.Caldiilineaceae.Caldiilinea                        | 0           |  |
| Bacteria.Chloroflexi.Thermomicrobia                                                                 | 0           |  |
| Bacteria.Chloroflexi.Thermomicrobia.Sphaerobacterales                                               | 0           |  |
| Bacteria.Chloroflexi.Thermomicrobia.Sphaerobacterales.Sphaerobacteraceae                            | 0           |  |
| Bacteria.Chloroflexi.Thermomicrobia.Sphaerobacterales.Sphaerobacteraceae.Sphaerobacter              | 0           |  |
| Bacteria.Chloroflexi.Thermomicrobia.unclassified_order                                              | 0           |  |
| Bacteria.Chloroflexi.Thermomicrobia.unclassified_order.unclassified_family                          | 0           |  |
| Bacteria.Chloroflexi.Thermomicrobia.unclassified_order.unclassified_family.unclassified_genus       | 0           |  |
| Bacteria.Chloroflexi.unclassified_class                                                             | 0           |  |
| Bacteria.Chloroflexi.unclassified_class.unclassified_order                                          | 0           |  |
| Bacteria.Chloroflexi.unclassified_class.unclassified_order.unclassified_family                      | 0           |  |
| Bacteria.Chloroflexi.unclassified_class.unclassified_order.unclassified_family.unclassified_genus   | 0           |  |
| Bacteria.Deinococcus_Thermus                                                                        | 0           |  |
| Bacteria.Deinococcus_Thermus.Deinococci                                                             | 0           |  |
| Bacteria.Deinococcus_Thermus.Deinococci_Deinococcales                                               | 0           |  |
| Bacteria.Deinococcus_Thermus.Deinococci_Deinococcales_Deinococcaceae                                | 0           |  |
| Bacteria.Deinococcus_Thermus.Deinococci_Deinococcales_Deinococcaceae_Deinococcus                    | 0           |  |
| Bacteria.Deinococcus_Thermus.Deinococci_Deinococcales_Trueperaceae                                  | 0           |  |
| Bacteria.Deinococcus_Thermus.Deinococci_Deinococcales_Trueperaceae_Truepera                         | 0           |  |
| Bacteria.Deinococcus_Thermus.Deinococci_Thermales                                                   | 0           |  |
| Bacteria.Deinococcus_Thermus.Deinococci_Thermales_Thermaceae                                        | 0           |  |
| Bacteria.Deinococcus_Thermus.Deinococci_Thermales_Thermaceae_Meiothermus                            | 0           |  |
| Bacteria.Deinococcus_Thermus.Deinococci.unclassified_order                                          | 0           |  |
| Bacteria.Deinococcus_Thermus.Deinococci.unclassified_order.unclassified_family                      | 0           |  |
| Bacteria.Deinococcus_Thermus.Deinococci.unclassified_order.unclassified_family.unclassified_genus   | 0           |  |
| Bacteria.Firmicutes                                                                                 | 5.741882699 |  |
| Bacteria.Firmicutes.Bacilli                                                                         | 5.731425133 |  |
| Bacteria.Firmicutes.Bacilli.Bacillales                                                              | 4.226199611 |  |
| Bacteria.Firmicutes.Bacilli.Bacillales.Alicyclobacillaceae                                          | 0           |  |
| Bacteria.Firmicutes.Bacilli.Bacillales.Alicyclobacillaceae.Alicyclobacillus                         | 0           |  |
| Bacteria.Firmicutes.Bacilli.Bacillales.Bacillaceae                                                  | 4.03475358  |  |
| Bacteria.Firmicutes.Bacilli.Bacillales.Bacillaceae.Anoxybacillus                                    | 0           |  |
| Bacteria.Firmicutes.Bacilli.Bacillales.Bacillaceae.Bacillus                                         | 3.93007205  |  |
| Bacteria.Firmicutes.Bacilli.Bacillales.Bacillaceae.Caldalkalibacillus                               | 0           |  |
| Bacteria.Firmicutes.Bacilli.Bacillales.Bacillaceae.Cerasibacillus                                   | 0           |  |
| Bacteria.Firmicutes.Bacilli.Bacillales.Bacillaceae.Exiguobacterium                                  | 0           |  |
| Bacteria.Firmicutes.Bacilli.Bacillales.Bacillaceae.Geobacillus                                      | 0           |  |
| Bacteria.Firmicutes.Bacilli.Bacillales.Bacillaceae.Gracilibacillus                                  | 0           |  |
| Bacteria.Firmicutes.Bacilli.Bacillales.Bacillaceae.Lentibacillus                                    | 0           |  |
| Bacteria.Firmicutes.Bacilli.Bacillales.Bacillaceae.Lysinibacillus                                   | 0           |  |
| Bacteria.Firmicutes.Bacilli.Bacillales.Bacillaceae.Oceanobacillus                                   | 0           |  |
| Bacteria.Firmicutes.Bacilli.Bacillales.Bacillaceae.Ornithinibacillus                                | 0           |  |
| Bacteria.Firmicutes.Bacilli.Bacillales.Bacillaceae.Tenuibacillus                                    | 0           |  |
| Bacteria.Firmicutes.Bacilli.Bacillales.Bacillaceae.Terribacillus                                    | 0           |  |
| Bacteria.Firmicutes.Bacilli.Bacillales.Bacillaceae.Tumebacillus                                     | 0           |  |
| Bacteria.Firmicutes.Bacilli.Bacillales.Bacillaceae.unclassified_genus                               | 3.562260965 |  |
| Bacteria.Firmicutes.Bacilli.Bacillales.Bacillaceae.Ureibacillus                                     | 0           |  |
| Bacteria.Firmicutes.Bacilli.Bacillales.Bacillaceae.Virgibacillus                                    | 0           |  |
| Bacteria.Firmicutes.Bacilli.Bacillales.Bacillales_incertae_sedis                                    | 0           |  |
| Bacteria.Firmicutes.Bacilli.Bacillales.Bacillales_incertae_sedis.Rummeliibacillus                   | 0           |  |
| Bacteria.Firmicutes.Bacilli.Bacillales.Bacillales_incertae_sedis.Solibacillus                       | 0           |  |
| Bacteria.Firmicutes.Bacilli.Bacillales.Listeriaceae                                                 | 0           |  |
| Bacteria.Firmicutes.Bacilli.Bacillales.Listeriaceae.Brochothrix                                     | 0           |  |
| Bacteria.Firmicutes.Bacilli.Bacillales.Listeriaceae.Listeria                                        | 0           |  |
| Bacteria.Firmicutes.Bacilli.Bacillales.Paenibacillaceae                                             | 0           |  |
| Bacteria.Firmicutes.Bacilli.Bacillales.Paenibacillaceae.Ammoniphilus                                | 0           |  |
| Bacteria.Firmicutes.Bacilli.Bacillales.Paenibacillaceae.Aneurinibacillus                            | 0           |  |
| Bacteria.Firmicutes.Bacilli.Bacillales.Paenibacillaceae.Brevibacillus                               | 0           |  |
| Bacteria.Firmicutes.Bacilli.Bacillales.Paenibacillaceae.Cohnella                                    | 0           |  |
| Bacteria.Firmicutes.Bacilli.Bacillales.Paenibacillaceae.Oxalophagus                                 | 0           |  |

|                                                                                       |             |  |  |
|---------------------------------------------------------------------------------------|-------------|--|--|
| Bacteria.Firmicutes.Bacilli.Bacillales.Paenibacillaceae.Paenibacillus                 | 0           |  |  |
| Bacteria.Firmicutes.Bacilli.Bacillales.Paenibacillaceae.Saccharibacillus              | 0           |  |  |
| Bacteria.Firmicutes.Bacilli.Bacillales.Paenibacillaceae.unclassified_genus            | 0           |  |  |
| Bacteria.Firmicutes.Bacilli.Bacillales.Planococcaceae                                 | 0           |  |  |
| Bacteria.Firmicutes.Bacilli.Bacillales.Planococcaceae.Bhargavaea                      | 0           |  |  |
| Bacteria.Firmicutes.Bacilli.Bacillales.Planococcaceae.Kurthia                         | 0           |  |  |
| Bacteria.Firmicutes.Bacilli.Bacillales.Planococcaceae.Planococcus                     | 0           |  |  |
| Bacteria.Firmicutes.Bacilli.Bacillales.Planococcaceae.Planomicrobium                  | 0           |  |  |
| Bacteria.Firmicutes.Bacilli.Bacillales.Planococcaceae.Sporosarcina                    | 0           |  |  |
| Bacteria.Firmicutes.Bacilli.Bacillales.Planococcaceae.unclassified_genus              | 0           |  |  |
| Bacteria.Firmicutes.Bacilli.Bacillales.Staphylococcaceae                              | 3.778249365 |  |  |
| Bacteria.Firmicutes.Bacilli.Bacillales.Staphylococcaceae.Gemella                      | 0           |  |  |
| Bacteria.Firmicutes.Bacilli.Bacillales.Staphylococcaceae.Jeotgaliococcus              | 0           |  |  |
| Bacteria.Firmicutes.Bacilli.Bacillales.Staphylococcaceae.Macrocooccus                 | 0           |  |  |
| Bacteria.Firmicutes.Bacilli.Bacillales.Staphylococcaceae.Nosocomiocooccus             | 0           |  |  |
| Bacteria.Firmicutes.Bacilli.Bacillales.Staphylococcaceae.Saliniococcus                | 0           |  |  |
| Bacteria.Firmicutes.Bacilli.Bacillales.Staphylococcaceae.Staphylococcus               | 3.778249365 |  |  |
| Bacteria.Firmicutes.Bacilli.Bacillales.Thermoactinomycetaceae                         | 0           |  |  |
| Bacteria.Firmicutes.Bacilli.Bacillales.Thermoactinomycetaceae.Thermoactinomycetes     | 0           |  |  |
| Bacteria.Firmicutes.Bacilli.Bacillales.Thermoactinomycetaceae.unclassified_genus      | 0           |  |  |
| Bacteria.Firmicutes.Bacilli.Bacillales.unclassified_family                            | 0           |  |  |
| Bacteria.Firmicutes.Bacilli.Bacillales.unclassified_family.unclassified_genus         | 0           |  |  |
| Bacteria.Firmicutes.Bacilli.Lactobacillales                                           | 5.717639285 |  |  |
| Bacteria.Firmicutes.Bacilli.Lactobacillales.Aerococcaceae                             | 0           |  |  |
| Bacteria.Firmicutes.Bacilli.Lactobacillales.Aerococcaceae.Abiotrophia                 | 0           |  |  |
| Bacteria.Firmicutes.Bacilli.Lactobacillales.Aerococcaceae.Aerococcus                  | 0           |  |  |
| Bacteria.Firmicutes.Bacilli.Lactobacillales.Aerococcaceae.Eremococcus                 | 0           |  |  |
| Bacteria.Firmicutes.Bacilli.Lactobacillales.Aerococcaceae.Globicatella                | 0           |  |  |
| Bacteria.Firmicutes.Bacilli.Lactobacillales.Carnobacteriaceae                         | 3.072629637 |  |  |
| Bacteria.Firmicutes.Bacilli.Lactobacillales.Carnobacteriaceae.Atopostipes             | 0           |  |  |
| Bacteria.Firmicutes.Bacilli.Lactobacillales.Carnobacteriaceae.Carnobacterium          | 3.072629637 |  |  |
| Bacteria.Firmicutes.Bacilli.Lactobacillales.Carnobacteriaceae.Desemzia                | 0           |  |  |
| Bacteria.Firmicutes.Bacilli.Lactobacillales.Carnobacteriaceae.Granulicatella          | 0           |  |  |
| Bacteria.Firmicutes.Bacilli.Lactobacillales.Carnobacteriaceae.Marinilactibacillus     | 0           |  |  |
| Bacteria.Firmicutes.Bacilli.Lactobacillales.Carnobacteriaceae.Trichococcus            | 0           |  |  |
| Bacteria.Firmicutes.Bacilli.Lactobacillales.Carnobacteriaceae.unclassified_genus      | 0           |  |  |
| Bacteria.Firmicutes.Bacilli.Lactobacillales.Enterococcaceae                           | 4.037422441 |  |  |
| Bacteria.Firmicutes.Bacilli.Lactobacillales.Enterococcaceae.Enterococcus              | 4.037422441 |  |  |
| Bacteria.Firmicutes.Bacilli.Lactobacillales.Enterococcaceae.unclassified_genus        | 0           |  |  |
| Bacteria.Firmicutes.Bacilli.Lactobacillales.Enterococcaceae.Vagococcus                | 0           |  |  |
| Bacteria.Firmicutes.Bacilli.Lactobacillales.Lactobacillaceae                          | 4.156940991 |  |  |
| Bacteria.Firmicutes.Bacilli.Lactobacillales.Lactobacillaceae.Lactobacillus            | 4.156940991 |  |  |
| Bacteria.Firmicutes.Bacilli.Lactobacillales.Lactobacillaceae.Pediococcus              | 0           |  |  |
| Bacteria.Firmicutes.Bacilli.Lactobacillales.Lactobacillaceae.unclassified_genus       | 0           |  |  |
| Bacteria.Firmicutes.Bacilli.Lactobacillales.Leuconostocaceae                          | 5.542249348 |  |  |
| Bacteria.Firmicutes.Bacilli.Lactobacillales.Leuconostocaceae.Leuconostoc              | 5.083808037 |  |  |
| Bacteria.Firmicutes.Bacilli.Lactobacillales.Leuconostocaceae.unclassified_genus       | 0           |  |  |
| Bacteria.Firmicutes.Bacilli.Lactobacillales.Leuconostocaceae.Weissella                | 5.356507914 |  |  |
| Bacteria.Firmicutes.Bacilli.Lactobacillales.Streptococcaceae                          | 5.175782145 |  |  |
| Bacteria.Firmicutes.Bacilli.Lactobacillales.Streptococcaceae.Lactococcus              | 5.041281712 |  |  |
| Bacteria.Firmicutes.Bacilli.Lactobacillales.Streptococcaceae.Streptococcus            | 4.573304732 |  |  |
| Bacteria.Firmicutes.Bacilli.Lactobacillales.Streptococcaceae.unclassified_genus       | 3.559125128 |  |  |
| Bacteria.Firmicutes.Bacilli.Lactobacillales.unclassified_family                       | 0           |  |  |
| Bacteria.Firmicutes.Bacilli.Lactobacillales.unclassified_family.unclassified_genus    | 0           |  |  |
| Bacteria.Firmicutes.Bacilli.unclassified_order                                        | 0           |  |  |
| Bacteria.Firmicutes.Bacilli.unclassified_order.unclassified_family                    | 0           |  |  |
| Bacteria.Firmicutes.Bacilli.unclassified_order.unclassified_family.unclassified_genus | 0           |  |  |
| Bacteria.Firmicutes.Clostridia                                                        | 4.118310706 |  |  |
| Bacteria.Firmicutes.Clostridia.Clostridiales                                          | 4.118310706 |  |  |
| Bacteria.Firmicutes.Clostridia.Clostridiales.Clostridiaceae                           | 0           |  |  |
| Bacteria.Firmicutes.Clostridia.Clostridiales.Clostridiaceae.Clostridium               | 0           |  |  |
| Bacteria.Firmicutes.Clostridia.Clostridiales.Clostridiaceae.Thermobrachium            | 0           |  |  |
| Bacteria.Firmicutes.Clostridia.Clostridiales.Clostridiaceae.unclassified_genus        | 0           |  |  |
| Bacteria.Firmicutes.Clostridia.Clostridiales.Eubacteriaceae                           | 0           |  |  |
| Bacteria.Firmicutes.Clostridia.Clostridiales.Eubacteriaceae.Eubacterium               | 0           |  |  |
| Bacteria.Firmicutes.Clostridia.Clostridiales.Eubacteriaceae.unclassified_genus        | 0           |  |  |
| Bacteria.Firmicutes.Clostridia.Clostridiales.IncertaeSedisXI                          | 0           |  |  |
| Bacteria.Firmicutes.Clostridia.Clostridiales.IncertaeSedisXI.Anaerococcus             | 0           |  |  |
| Bacteria.Firmicutes.Clostridia.Clostridiales.IncertaeSedisXI.Anaerosphaera            | 0           |  |  |
| Bacteria.Firmicutes.Clostridia.Clostridiales.IncertaeSedisXI.Finegoldia               | 0           |  |  |
| Bacteria.Firmicutes.Clostridia.Clostridiales.IncertaeSedisXI.Gallicola                | 0           |  |  |
| Bacteria.Firmicutes.Clostridia.Clostridiales.IncertaeSedisXI.Parvimonas               | 0           |  |  |
| Bacteria.Firmicutes.Clostridia.Clostridiales.IncertaeSedisXI.Peptoniphilus            | 0           |  |  |
| Bacteria.Firmicutes.Clostridia.Clostridiales.IncertaeSedisXI.Sporanaerobacter         | 0           |  |  |
| Bacteria.Firmicutes.Clostridia.Clostridiales.IncertaeSedisXI.Tepidimicrobium          | 0           |  |  |
| Bacteria.Firmicutes.Clostridia.Clostridiales.IncertaeSedisXI.Tissierella              | 0           |  |  |
| Bacteria.Firmicutes.Clostridia.Clostridiales.IncertaeSedisXI.unclassified_genus       | 0           |  |  |
| Bacteria.Firmicutes.Clostridia.Clostridiales.IncertaeSedisXIII                        | 0           |  |  |
| Bacteria.Firmicutes.Clostridia.Clostridiales.IncertaeSedisXIII.Anaerovorax            | 0           |  |  |
| Bacteria.Firmicutes.Clostridia.Clostridiales.IncertaeSedisXIII.unclassified_genus     | 0           |  |  |
| Bacteria.Firmicutes.Clostridia.Clostridiales.IncertaeSedisXIV                         | 0           |  |  |
| Bacteria.Firmicutes.Clostridia.Clostridiales.IncertaeSedisXIV.Blautia                 | 0           |  |  |
| Bacteria.Firmicutes.Clostridia.Clostridiales.Lachnospiraceae                          | 0           |  |  |
| Bacteria.Firmicutes.Clostridia.Clostridiales.Lachnospiraceae.Anaerospobacter          | 0           |  |  |
| Bacteria.Firmicutes.Clostridia.Clostridiales.Lachnospiraceae.Oribacterium             | 0           |  |  |
| Bacteria.Firmicutes.Clostridia.Clostridiales.Lachnospiraceae.unclassified_genus       | 0           |  |  |
| Bacteria.Firmicutes.Clostridia.Clostridiales.Peptococcaceae                           | 0           |  |  |
| Bacteria.Firmicutes.Clostridia.Clostridiales.Peptococcaceae.Peptococcus               | 0           |  |  |
| Bacteria.Firmicutes.Clostridia.Clostridiales.Peptococcaceae.unclassified_genus        | 0           |  |  |
| Bacteria.Firmicutes.Clostridia.Clostridiales.Peptostreptococcaceae                    | 0           |  |  |
| Bacteria.Firmicutes.Clostridia.Clostridiales.Peptostreptococcaceae.Peptostreptococcus | 0           |  |  |
| Bacteria.Firmicutes.Clostridia.Clostridiales.Peptostreptococcaceae.Sporacetigenium    | 0           |  |  |
| Bacteria.Firmicutes.Clostridia.Clostridiales.Peptostreptococcaceae.unclassified_genus | 0           |  |  |
| Bacteria.Firmicutes.Clostridia.Clostridiales.Ruminococcaceae                          | 3.853899272 |  |  |
| Bacteria.Firmicutes.Clostridia.Clostridiales.Ruminococcaceae.Acetivibrio              | 0           |  |  |
| Bacteria.Firmicutes.Clostridia.Clostridiales.Ruminococcaceae.Anaerofilum              | 0           |  |  |
| Bacteria.Firmicutes.Clostridia.Clostridiales.Ruminococcaceae.Anaerotruncus            | 0           |  |  |
| Bacteria.Firmicutes.Clostridia.Clostridiales.Ruminococcaceae.Butyrivibrio             | 0           |  |  |
| Bacteria.Firmicutes.Clostridia.Clostridiales.Ruminococcaceae.Faecalibacterium         | 0           |  |  |
| Bacteria.Firmicutes.Clostridia.Clostridiales.Ruminococcaceae.Oscillibacter            | 0           |  |  |
| Bacteria.Firmicutes.Clostridia.Clostridiales.Ruminococcaceae.Ruminococcus             | 0           |  |  |
| Bacteria.Firmicutes.Clostridia.Clostridiales.Ruminococcaceae.Subdoligranulum          | 0           |  |  |
| Bacteria.Firmicutes.Clostridia.Clostridiales.Ruminococcaceae.unclassified_genus       | 3.853899272 |  |  |





|                                                                                                              |             |  |  |
|--------------------------------------------------------------------------------------------------------------|-------------|--|--|
| Bacteria.Proteobacteria.Alphaproteobacteria.Rhodospirillales                                                 | 0           |  |  |
| Bacteria.Proteobacteria.Alphaproteobacteria.Rhodospirillales.Acetobacteraceae                                | 0           |  |  |
| Bacteria.Proteobacteria.Alphaproteobacteria.Rhodospirillales.Acetobacteraceae.Acetobacter                    | 0           |  |  |
| Bacteria.Proteobacteria.Alphaproteobacteria.Rhodospirillales.Acetobacteraceae.Belnapia                       | 0           |  |  |
| Bacteria.Proteobacteria.Alphaproteobacteria.Rhodospirillales.Acetobacteraceae.Gluconacetobacter              | 0           |  |  |
| Bacteria.Proteobacteria.Alphaproteobacteria.Rhodospirillales.Acetobacteraceae.Gluconobacter                  | 0           |  |  |
| Bacteria.Proteobacteria.Alphaproteobacteria.Rhodospirillales.Acetobacteraceae.Roseococcus                    | 0           |  |  |
| Bacteria.Proteobacteria.Alphaproteobacteria.Rhodospirillales.Acetobacteraceae.Roseomonas                     | 0           |  |  |
| Bacteria.Proteobacteria.Alphaproteobacteria.Rhodospirillales.Acetobacteraceae.unclassified_genus             | 0           |  |  |
| Bacteria.Proteobacteria.Alphaproteobacteria.Rhodospirillales.Rhodospirillaceae                               | 0           |  |  |
| Bacteria.Proteobacteria.Alphaproteobacteria.Rhodospirillales.Rhodospirillaceae.Azospillum                    | 0           |  |  |
| Bacteria.Proteobacteria.Alphaproteobacteria.Rhodospirillales.Rhodospirillaceae.Skermanella                   | 0           |  |  |
| Bacteria.Proteobacteria.Alphaproteobacteria.Rhodospirillales.Rhodospirillaceae.Telmatospillum                | 0           |  |  |
| Bacteria.Proteobacteria.Alphaproteobacteria.Rhodospirillales.Rhodospirillaceae.unclassified_genus            | 0           |  |  |
| Bacteria.Proteobacteria.Alphaproteobacteria.Sphingomonadales                                                 | 5.356144642 |  |  |
| Bacteria.Proteobacteria.Alphaproteobacteria.Sphingomonadales.Erythrobacteraceae                              | 0           |  |  |
| Bacteria.Proteobacteria.Alphaproteobacteria.Sphingomonadales.Erythrobacteraceae.Porphrobacter                | 0           |  |  |
| Bacteria.Proteobacteria.Alphaproteobacteria.Sphingomonadales.Sphingomonadaceae                               | 5.356144642 |  |  |
| Bacteria.Proteobacteria.Alphaproteobacteria.Sphingomonadales.Sphingomonadaceae.Blastomonas                   | 0           |  |  |
| Bacteria.Proteobacteria.Alphaproteobacteria.Sphingomonadales.Sphingomonadaceae.Novosphingobium               | 0           |  |  |
| Bacteria.Proteobacteria.Alphaproteobacteria.Sphingomonadales.Sphingomonadaceae.Sphingobium                   | 0           |  |  |
| Bacteria.Proteobacteria.Alphaproteobacteria.Sphingomonadales.Sphingomonadaceae.Sphingomonas                  | 5.312337269 |  |  |
| Bacteria.Proteobacteria.Alphaproteobacteria.Sphingomonadales.Sphingomonadaceae.unclassified_genus            | 4.338187957 |  |  |
| Bacteria.Proteobacteria.Alphaproteobacteria.Sphingomonadales.unclassified_family                             | 0           |  |  |
| Bacteria.Proteobacteria.Alphaproteobacteria.Sphingomonadales.unclassified_family.unclassified_genus          | 0           |  |  |
| Bacteria.Proteobacteria.Alphaproteobacteria.unclassified_order                                               | 0           |  |  |
| Bacteria.Proteobacteria.Alphaproteobacteria.unclassified_order.unclassified_family                           | 0           |  |  |
| Bacteria.Proteobacteria.Alphaproteobacteria.unclassified_order.unclassified_family.unclassified_genus        | 0           |  |  |
| Bacteria.Proteobacteria.Betaproteobacteria                                                                   | 4.522829566 |  |  |
| Bacteria.Proteobacteria.Betaproteobacteria.Burkholderiales                                                   | 4.455610829 |  |  |
| Bacteria.Proteobacteria.Betaproteobacteria.Burkholderiales.Alcaligenaceae                                    | 0           |  |  |
| Bacteria.Proteobacteria.Betaproteobacteria.Burkholderiales.Alcaligenaceae.Achromobacter                      | 0           |  |  |
| Bacteria.Proteobacteria.Betaproteobacteria.Burkholderiales.Alcaligenaceae.Alcaligenes                        | 0           |  |  |
| Bacteria.Proteobacteria.Betaproteobacteria.Burkholderiales.Alcaligenaceae.Sutterella                         | 0           |  |  |
| Bacteria.Proteobacteria.Betaproteobacteria.Burkholderiales.Alcaligenaceae.unclassified_genus                 | 0           |  |  |
| Bacteria.Proteobacteria.Betaproteobacteria.Burkholderiales.Burkholderiaceae                                  | 3.373659633 |  |  |
| Bacteria.Proteobacteria.Betaproteobacteria.Burkholderiales.Burkholderiaceae.Burkholderia                     | 3.373659633 |  |  |
| Bacteria.Proteobacteria.Betaproteobacteria.Burkholderiales.Burkholderiaceae.Chilimonas                       | 0           |  |  |
| Bacteria.Proteobacteria.Betaproteobacteria.Burkholderiales.Burkholderiaceae.Cupriavidus                      | 0           |  |  |
| Bacteria.Proteobacteria.Betaproteobacteria.Burkholderiales.Burkholderiaceae.Pandoraea                        | 0           |  |  |
| Bacteria.Proteobacteria.Betaproteobacteria.Burkholderiales.Burkholderiaceae.Polynucleobacter                 | 0           |  |  |
| Bacteria.Proteobacteria.Betaproteobacteria.Burkholderiales.Burkholderiaceae.Ralstonia                        | 0           |  |  |
| Bacteria.Proteobacteria.Betaproteobacteria.Burkholderiales.Burkholderiaceae.unclassified_genus               | 0           |  |  |
| Bacteria.Proteobacteria.Betaproteobacteria.Burkholderiales.Burkholderiales.incertae_sedis                    | 3.077274542 |  |  |
| Bacteria.Proteobacteria.Betaproteobacteria.Burkholderiales.Burkholderiales.incertae_sedis.Aquabacterium      | 3.077274542 |  |  |
| Bacteria.Proteobacteria.Betaproteobacteria.Burkholderiales.Burkholderiales.incertae_sedis.Ideonella          | 0           |  |  |
| Bacteria.Proteobacteria.Betaproteobacteria.Burkholderiales.Burkholderiales.incertae_sedis.Leptothrix         | 0           |  |  |
| Bacteria.Proteobacteria.Betaproteobacteria.Burkholderiales.Burkholderiales.incertae_sedis.Tepidimonas        | 0           |  |  |
| Bacteria.Proteobacteria.Betaproteobacteria.Burkholderiales.Burkholderiales.incertae_sedis.unclassified_genus | 0           |  |  |
| Bacteria.Proteobacteria.Betaproteobacteria.Burkholderiales.Comamonadaceae                                    | 4.331071289 |  |  |
| Bacteria.Proteobacteria.Betaproteobacteria.Burkholderiales.Comamonadaceae.Acidovorax                         | 4.25189673  |  |  |
| Bacteria.Proteobacteria.Betaproteobacteria.Burkholderiales.Comamonadaceae.Alicyciphilus                      | 0           |  |  |
| Bacteria.Proteobacteria.Betaproteobacteria.Burkholderiales.Comamonadaceae.Comamonas                          | 0           |  |  |
| Bacteria.Proteobacteria.Betaproteobacteria.Burkholderiales.Comamonadaceae.Curvibacter                        | 0           |  |  |
| Bacteria.Proteobacteria.Betaproteobacteria.Burkholderiales.Comamonadaceae.Delftia                            | 0           |  |  |
| Bacteria.Proteobacteria.Betaproteobacteria.Burkholderiales.Comamonadaceae.Diaphorobacter                     | 3.552886606 |  |  |
| Bacteria.Proteobacteria.Betaproteobacteria.Burkholderiales.Comamonadaceae.Hydrogenophaga                     | 0           |  |  |
| Bacteria.Proteobacteria.Betaproteobacteria.Burkholderiales.Comamonadaceae.Pelomonas                          | 0           |  |  |
| Bacteria.Proteobacteria.Betaproteobacteria.Burkholderiales.Comamonadaceae.Polaromonas                        | 0           |  |  |
| Bacteria.Proteobacteria.Betaproteobacteria.Burkholderiales.Comamonadaceae.Rhodiferax                         | 0           |  |  |
| Bacteria.Proteobacteria.Betaproteobacteria.Burkholderiales.Comamonadaceae.unclassified_genus                 | 0           |  |  |
| Bacteria.Proteobacteria.Betaproteobacteria.Burkholderiales.Comamonadaceae.Variovorax                         | 0           |  |  |
| Bacteria.Proteobacteria.Betaproteobacteria.Burkholderiales.Oxalobacteraceae                                  | 3.077274542 |  |  |
| Bacteria.Proteobacteria.Betaproteobacteria.Burkholderiales.Oxalobacteraceae.Duganella                        | 0           |  |  |
| Bacteria.Proteobacteria.Betaproteobacteria.Burkholderiales.Oxalobacteraceae.Herbaspirillum                   | 0           |  |  |
| Bacteria.Proteobacteria.Betaproteobacteria.Burkholderiales.Oxalobacteraceae.Janthinobacterium                | 0           |  |  |
| Bacteria.Proteobacteria.Betaproteobacteria.Burkholderiales.Oxalobacteraceae.Massilia                         | 0           |  |  |
| Bacteria.Proteobacteria.Betaproteobacteria.Burkholderiales.Oxalobacteraceae.Oxalobacter                      | 0           |  |  |
| Bacteria.Proteobacteria.Betaproteobacteria.Burkholderiales.Oxalobacteraceae.unclassified_genus               | 3.077274542 |  |  |
| Bacteria.Proteobacteria.Betaproteobacteria.Burkholderiales.unclassified_family                               | 3.675880032 |  |  |
| Bacteria.Proteobacteria.Betaproteobacteria.Burkholderiales.unclassified_family.unclassified_genus            | 3.675880032 |  |  |
| Bacteria.Proteobacteria.Betaproteobacteria.Hydrogenophiles                                                   | 0           |  |  |
| Bacteria.Proteobacteria.Betaproteobacteria.Hydrogenophiles.Hydrogenophilaceae                                | 0           |  |  |
| Bacteria.Proteobacteria.Betaproteobacteria.Hydrogenophiles.Hydrogenophilaceae.Hydrogenophilus                | 0           |  |  |
| Bacteria.Proteobacteria.Betaproteobacteria.Hydrogenophiles.Hydrogenophilaceae.Petrobacter                    | 0           |  |  |
| Bacteria.Proteobacteria.Betaproteobacteria.Methylophilales                                                   | 0           |  |  |
| Bacteria.Proteobacteria.Betaproteobacteria.Methylophilales.Methylophilaceae                                  | 0           |  |  |
| Bacteria.Proteobacteria.Betaproteobacteria.Methylophilales.Methylophilaceae.Methylobacillus                  | 0           |  |  |
| Bacteria.Proteobacteria.Betaproteobacteria.Methylophilales.Methylophilaceae.Methylophilus                    | 0           |  |  |
| Bacteria.Proteobacteria.Betaproteobacteria.Methylophilales.Methylophilaceae.unclassified_genus               | 0           |  |  |
| Bacteria.Proteobacteria.Betaproteobacteria.Neisseriales                                                      | 3.679359642 |  |  |
| Bacteria.Proteobacteria.Betaproteobacteria.Neisseriales.Neisseriaceae                                        | 3.679359642 |  |  |
| Bacteria.Proteobacteria.Betaproteobacteria.Neisseriales.Neisseriaceae.Aquitalea                              | 0           |  |  |
| Bacteria.Proteobacteria.Betaproteobacteria.Neisseriales.Neisseriaceae.Kingella                               | 0           |  |  |
| Bacteria.Proteobacteria.Betaproteobacteria.Neisseriales.Neisseriaceae.Microvirgula                           | 3.378354754 |  |  |
| Bacteria.Proteobacteria.Betaproteobacteria.Neisseriales.Neisseriaceae.Neisseria                              | 0           |  |  |
| Bacteria.Proteobacteria.Betaproteobacteria.Neisseriales.Neisseriaceae.unclassified_genus                     | 0           |  |  |
| Bacteria.Proteobacteria.Betaproteobacteria.Neisseriales.Neisseriaceae.Uruburuella                            | 0           |  |  |
| Bacteria.Proteobacteria.Betaproteobacteria.Neisseriales.Neisseriaceae.Vitreoscilla                           | 0           |  |  |
| Bacteria.Proteobacteria.Betaproteobacteria.Neisseriales.Neisseriaceae.Vogesella                              | 3.378304538 |  |  |
| Bacteria.Proteobacteria.Betaproteobacteria.Nitrosomonadales                                                  | 0           |  |  |
| Bacteria.Proteobacteria.Betaproteobacteria.Nitrosomonadales.Nitrosomonadaceae                                | 0           |  |  |
| Bacteria.Proteobacteria.Betaproteobacteria.Nitrosomonadales.Nitrosomonadaceae.Nitrosospira                   | 0           |  |  |
| Bacteria.Proteobacteria.Betaproteobacteria.Nitrosomonadales.Nitrosomonadaceae.unclassified_genus             | 0           |  |  |
| Bacteria.Proteobacteria.Betaproteobacteria.Rhodocyclales                                                     | 0           |  |  |
| Bacteria.Proteobacteria.Betaproteobacteria.Rhodocyclales.Rhodocyclaceae                                      | 0           |  |  |
| Bacteria.Proteobacteria.Betaproteobacteria.Rhodocyclales.Rhodocyclaceae.Azonexus                             | 0           |  |  |
| Bacteria.Proteobacteria.Betaproteobacteria.Rhodocyclales.Rhodocyclaceae.Azospira                             | 0           |  |  |
| Bacteria.Proteobacteria.Betaproteobacteria.Rhodocyclales.Rhodocyclaceae.Dechloromonas                        | 0           |  |  |
| Bacteria.Proteobacteria.Betaproteobacteria.Rhodocyclales.Rhodocyclaceae.Methyloversatilis                    | 0           |  |  |
| Bacteria.Proteobacteria.Betaproteobacteria.Rhodocyclales.Rhodocyclaceae.Propionivibrio                       | 0           |  |  |
| Bacteria.Proteobacteria.Betaproteobacteria.Rhodocyclales.Rhodocyclaceae.Shinella                             | 0           |  |  |
| Bacteria.Proteobacteria.Betaproteobacteria.Rhodocyclales.Rhodocyclaceae.Thaueria                             | 0           |  |  |

|                                                                                                             |             |      |             |
|-------------------------------------------------------------------------------------------------------------|-------------|------|-------------|
| Bacteria.Proteobacteria.Betaproteobacteria.Rhodocyclales.Rhodocyclaceae.unclassified_genus                  | 0           |      |             |
| Bacteria.Proteobacteria.Betaproteobacteria.Rhodocyclales.Rhodocyclaceae.Zoogloea                            | 0           |      |             |
| Bacteria.Proteobacteria.Betaproteobacteria.unclassified_order                                               | 0           |      |             |
| Bacteria.Proteobacteria.Betaproteobacteria.unclassified_order.unclassified_family                           | 0           |      |             |
| Bacteria.Proteobacteria.Betaproteobacteria.unclassified_order.unclassified_family.unclassified_genus        | 0           |      |             |
| Bacteria.Proteobacteria.Deltaproteobacteria                                                                 | 0           |      |             |
| Bacteria.Proteobacteria.Deltaproteobacteria.Bdellovibrionales                                               | 0           |      |             |
| Bacteria.Proteobacteria.Deltaproteobacteria.Bdellovibrionales.Bacteriovoraceae                              | 0           |      |             |
| Bacteria.Proteobacteria.Deltaproteobacteria.Bdellovibrionales.Bacteriovoraceae.Bacteriovorax                | 0           |      |             |
| Bacteria.Proteobacteria.Deltaproteobacteria.Bdellovibrionales.Bacteriovoraceae.Peredibacter                 | 0           |      |             |
| Bacteria.Proteobacteria.Deltaproteobacteria.Bdellovibrionales.Bdellovibrionaceae                            | 0           |      |             |
| Bacteria.Proteobacteria.Deltaproteobacteria.Bdellovibrionales.Bdellovibrionaceae.Bdellovibrio               | 0           |      |             |
| Bacteria.Proteobacteria.Deltaproteobacteria.Desulfobivriales                                                | 0           |      |             |
| Bacteria.Proteobacteria.Deltaproteobacteria.Desulfobivriales.Desulfobivriaceae                              | 0           |      |             |
| Bacteria.Proteobacteria.Deltaproteobacteria.Desulfobivriales.Desulfobivriaceae.Desulfobivrio                | 0           |      |             |
| Bacteria.Proteobacteria.Deltaproteobacteria.Desulfuromonadales                                              | 0           |      |             |
| Bacteria.Proteobacteria.Deltaproteobacteria.Desulfuromonadales.Geobacteraceae                               | 0           |      |             |
| Bacteria.Proteobacteria.Deltaproteobacteria.Desulfuromonadales.Geobacteraceae.Geobacter                     | 0           |      |             |
| Bacteria.Proteobacteria.Deltaproteobacteria.Myxococcales                                                    | 0           |      |             |
| Bacteria.Proteobacteria.Deltaproteobacteria.Myxococcales.Cystobacteraceae                                   | 0           |      |             |
| Bacteria.Proteobacteria.Deltaproteobacteria.Myxococcales.Cystobacteraceae.Cystobacter                       | 0           |      |             |
| Bacteria.Proteobacteria.Deltaproteobacteria.Myxococcales.Cystobacteraceae.unclassified_genus                | 0           |      |             |
| Bacteria.Proteobacteria.Deltaproteobacteria.Myxococcales.Nannocystaceae                                     | 0           |      |             |
| Bacteria.Proteobacteria.Deltaproteobacteria.Myxococcales.Nannocystaceae.Nannocystis                         | 0           |      |             |
| Bacteria.Proteobacteria.Deltaproteobacteria.Myxococcales.Polyangiaceae                                      | 0           |      |             |
| Bacteria.Proteobacteria.Deltaproteobacteria.Myxococcales.Polyangiaceae.Byssovorax                           | 0           |      |             |
| Bacteria.Proteobacteria.Deltaproteobacteria.Myxococcales.Polyangiaceae.unclassified_genus                   | 0           |      |             |
| Bacteria.Proteobacteria.Deltaproteobacteria.Myxococcales.unclassified_family                                | 0           |      |             |
| Bacteria.Proteobacteria.Deltaproteobacteria.Myxococcales.unclassified_family.unclassified_genus             | 0           |      |             |
| Bacteria.Proteobacteria.Deltaproteobacteria.unclassified_order                                              | 0           |      |             |
| Bacteria.Proteobacteria.Deltaproteobacteria.unclassified_order.unclassified_family                          | 0           |      |             |
| Bacteria.Proteobacteria.Deltaproteobacteria.unclassified_order.unclassified_family.unclassified_genus       | 0           |      |             |
| Bacteria.Proteobacteria.Epsilonproteobacteria                                                               | 3.926472551 |      |             |
| Bacteria.Proteobacteria.Epsilonproteobacteria.Campylobacteriales                                            | 3.926472551 |      |             |
| Bacteria.Proteobacteria.Epsilonproteobacteria.Campylobacteriales.Campylobacteraceae                         | 3.926472551 |      |             |
| Bacteria.Proteobacteria.Epsilonproteobacteria.Campylobacteriales.Campylobacteraceae.Arcobacter              | 3.926472551 |      |             |
| Bacteria.Proteobacteria.Epsilonproteobacteria.Campylobacteriales.Campylobacteraceae.Campylobacter           | 0           |      |             |
| Bacteria.Proteobacteria.Epsilonproteobacteria.Campylobacteriales.Campylobacteraceae.Sulfurospirillum        | 0           |      |             |
| Bacteria.Proteobacteria.Epsilonproteobacteria.Campylobacteriales.Helicobacteraceae                          | 0           |      |             |
| Bacteria.Proteobacteria.Epsilonproteobacteria.Campylobacteriales.Helicobacteraceae.Helicobacter             | 0           |      |             |
| Bacteria.Proteobacteria.Epsilonproteobacteria.unclassified_order                                            | 0           |      |             |
| Bacteria.Proteobacteria.Epsilonproteobacteria.unclassified_order.unclassified_family                        | 0           |      |             |
| Bacteria.Proteobacteria.Epsilonproteobacteria.unclassified_order.unclassified_family.unclassified_genus     | 0           |      |             |
| Bacteria.Proteobacteria.Gammaproteobacteria                                                                 | 5.253283968 |      |             |
| Bacteria.Proteobacteria.Gammaproteobacteria.Aeromonadales                                                   | 3.077274542 |      |             |
| Bacteria.Proteobacteria.Gammaproteobacteria.Aeromonadales.Aeromonadaceae                                    | 3.077274542 |      |             |
| Bacteria.Proteobacteria.Gammaproteobacteria.Aeromonadales.Aeromonadaceae.Aeromonas                          | 3.077274542 |      |             |
| Bacteria.Proteobacteria.Gammaproteobacteria.Aeromonadales.Aeromonadaceae.unclassified_genus                 | 0           |      |             |
| Bacteria.Proteobacteria.Gammaproteobacteria.Alteromonadales                                                 | 0           |      |             |
| Bacteria.Proteobacteria.Gammaproteobacteria.Alteromonadales.Shewanellaceae                                  | 0           |      |             |
| Bacteria.Proteobacteria.Gammaproteobacteria.Alteromonadales.Shewanellaceae.Shewanella                       | 0           |      |             |
| Bacteria.Proteobacteria.Gammaproteobacteria.Alteromonadales.unclassified_family                             | 0           |      |             |
| Bacteria.Proteobacteria.Gammaproteobacteria.Alteromonadales.unclassified_family.unclassified_genus          | 0           |      |             |
| Bacteria.Proteobacteria.Gammaproteobacteria.Chromatiales                                                    | 0           |      |             |
| Bacteria.Proteobacteria.Gammaproteobacteria.Chromatiales.Chromatiaceae                                      | 0           |      |             |
| Bacteria.Proteobacteria.Gammaproteobacteria.Chromatiales.Chromatiaceae.Rheinheimera                         | 0           |      |             |
| Bacteria.Proteobacteria.Gammaproteobacteria.Enterobacteriales                                               | 4.906059124 |      |             |
| Bacteria.Proteobacteria.Gammaproteobacteria.Enterobacteriales.Enterobacteriaceae                            | 4.906059124 |      |             |
| Bacteria.Proteobacteria.Gammaproteobacteria.Enterobacteriales.Enterobacteriaceae.Buttiauxella               | 0           |      |             |
| Bacteria.Proteobacteria.Gammaproteobacteria.Enterobacteriales.Enterobacteriaceae.Cedecea                    | 0           |      |             |
| Bacteria.Proteobacteria.Gammaproteobacteria.Enterobacteriales.Enterobacteriaceae.Citrobacter                | 4.674134917 | GB-H | 4.045613417 |
| Bacteria.Proteobacteria.Gammaproteobacteria.Enterobacteriales.Enterobacteriaceae.Cronobacter                | 0           |      |             |
| Bacteria.Proteobacteria.Gammaproteobacteria.Enterobacteriales.Enterobacteriaceae.Enterobacter               | 0           |      |             |
| Bacteria.Proteobacteria.Gammaproteobacteria.Enterobacteriales.Enterobacteriaceae.Erwinia                    | 3.800244823 |      |             |
| Bacteria.Proteobacteria.Gammaproteobacteria.Enterobacteriales.Enterobacteriaceae.Escherichia_Shigella       | 3.976339777 |      |             |
| Bacteria.Proteobacteria.Gammaproteobacteria.Enterobacteriales.Enterobacteriaceae.Klebsiella                 | 3.774512957 |      |             |
| Bacteria.Proteobacteria.Gammaproteobacteria.Enterobacteriales.Enterobacteriaceae.Kluyvera                   | 0           |      |             |
| Bacteria.Proteobacteria.Gammaproteobacteria.Enterobacteriales.Enterobacteriaceae.Morganella                 | 0           |      |             |
| Bacteria.Proteobacteria.Gammaproteobacteria.Enterobacteriales.Enterobacteriaceae.Pantoea                    | 3.946372858 |      |             |
| Bacteria.Proteobacteria.Gammaproteobacteria.Enterobacteriales.Enterobacteriaceae.Raoultella                 | 0           |      |             |
| Bacteria.Proteobacteria.Gammaproteobacteria.Enterobacteriales.Enterobacteriaceae.Serratia                   | 3.388218353 |      |             |
| Bacteria.Proteobacteria.Gammaproteobacteria.Enterobacteriales.Enterobacteriaceae.Trabulsirella              | 0           |      |             |
| Bacteria.Proteobacteria.Gammaproteobacteria.Enterobacteriales.Enterobacteriaceae.unclassified_genus         | 4.037422441 |      |             |
| Bacteria.Proteobacteria.Gammaproteobacteria.Enterobacteriales.Enterobacteriaceae.Yersinia                   | 0           |      |             |
| Bacteria.Proteobacteria.Gammaproteobacteria.Gammaproteobacteria_incertae_sedis                              | 3.077274542 |      |             |
| Bacteria.Proteobacteria.Gammaproteobacteria.Gammaproteobacteria_incertae_sedis.Solimonas                    | 3.077274542 |      |             |
| Bacteria.Proteobacteria.Gammaproteobacteria.Gammaproteobacteria_incertae_sedis.Solimonas.unclassified_genus | 3.077274542 |      |             |
| Bacteria.Proteobacteria.Gammaproteobacteria.Legionellales                                                   | 0           |      |             |
| Bacteria.Proteobacteria.Gammaproteobacteria.Legionellales.Coxiellaceae                                      | 0           |      |             |
| Bacteria.Proteobacteria.Gammaproteobacteria.Legionellales.Coxiellaceae.Aquicella                            | 0           |      |             |
| Bacteria.Proteobacteria.Gammaproteobacteria.Legionellales.Legionellaceae                                    | 0           |      |             |
| Bacteria.Proteobacteria.Gammaproteobacteria.Legionellales.Legionellaceae.Legionella                         | 0           |      |             |
| Bacteria.Proteobacteria.Gammaproteobacteria.Legionellales.Legionellaceae.unclassified_genus                 | 0           |      |             |
| Bacteria.Proteobacteria.Gammaproteobacteria.Oceanospirillales                                               | 0           |      |             |
| Bacteria.Proteobacteria.Gammaproteobacteria.Oceanospirillales.Halomonadaceae                                | 0           |      |             |
| Bacteria.Proteobacteria.Gammaproteobacteria.Oceanospirillales.Halomonadaceae.Halomonas                      | 0           |      |             |
| Bacteria.Proteobacteria.Gammaproteobacteria.Pasteurellales                                                  | 0           |      |             |
| Bacteria.Proteobacteria.Gammaproteobacteria.Pasteurellales.Pasteurellaceae                                  | 0           |      |             |
| Bacteria.Proteobacteria.Gammaproteobacteria.Pasteurellales.Pasteurellaceae.Actinobacillus                   | 0           |      |             |
| Bacteria.Proteobacteria.Gammaproteobacteria.Pasteurellales.Pasteurellaceae.Aggregatibacter                  | 0           |      |             |
| Bacteria.Proteobacteria.Gammaproteobacteria.Pasteurellales.Pasteurellaceae.Haemophilus                      | 0           |      |             |
| Bacteria.Proteobacteria.Gammaproteobacteria.Pasteurellales.Pasteurellaceae.Pasteurella                      | 0           |      |             |
| Bacteria.Proteobacteria.Gammaproteobacteria.Pasteurellales.Pasteurellaceae.unclassified_genus               | 0           |      |             |
| Bacteria.Proteobacteria.Gammaproteobacteria.Pseudomonadales                                                 | 4.994004168 |      |             |
| Bacteria.Proteobacteria.Gammaproteobacteria.Pseudomonadales.Moraxellaceae                                   | 4.881485689 |      |             |
| Bacteria.Proteobacteria.Gammaproteobacteria.Pseudomonadales.Moraxellaceae.Acinetobacter                     | 4.781424507 |      |             |
| Bacteria.Proteobacteria.Gammaproteobacteria.Pseudomonadales.Moraxellaceae.Alkanindiges                      | 0           |      |             |
| Bacteria.Proteobacteria.Gammaproteobacteria.Pseudomonadales.Moraxellaceae.Enhydrobacter                     | 3.981631143 |      |             |
| Bacteria.Proteobacteria.Gammaproteobacteria.Pseudomonadales.Moraxellaceae.Moraxella                         | 0           |      |             |
| Bacteria.Proteobacteria.Gammaproteobacteria.Pseudomonadales.Moraxellaceae.Perlucciabaca                     | 0           |      |             |
| Bacteria.Proteobacteria.Gammaproteobacteria.Pseudomonadales.Moraxellaceae.Psychrobacter                     | 0           |      |             |
| Bacteria.Proteobacteria.Gammaproteobacteria.Pseudomonadales.Moraxellaceae.unclassified_genus                | 3.925119696 |      |             |
| Bacteria.Proteobacteria.Gammaproteobacteria.Pseudomonadales.Pseudomonadaceae                                | 4.352398446 |      |             |

|                                                                                                                     |             |      |             |
|---------------------------------------------------------------------------------------------------------------------|-------------|------|-------------|
| Bacteria.Proteobacteria.Gammaproteobacteria.Pseudomonadales.Pseudomonadaceae.Azorhizophilus                         | 0           |      |             |
| Bacteria.Proteobacteria.Gammaproteobacteria.Pseudomonadales.Pseudomonadaceae.Ceclivibrio                            | 0           |      |             |
| Bacteria.Proteobacteria.Gammaproteobacteria.Pseudomonadales.Pseudomonadaceae.Pseudomonas                            | 4.327329572 |      |             |
| Bacteria.Proteobacteria.Gammaproteobacteria.Pseudomonadales.Pseudomonadaceae.unclassified_genus                     | 3.101274818 |      |             |
| Bacteria.Proteobacteria.Gammaproteobacteria.Pseudomonadales.unclassified_family                                     | 0           |      |             |
| Bacteria.Proteobacteria.Gammaproteobacteria.Pseudomonadales.unclassified_family.unclassified_genus                  | 0           |      |             |
| Bacteria.Proteobacteria.Gammaproteobacteria.Salinisphaerales                                                        | 0           |      |             |
| Bacteria.Proteobacteria.Gammaproteobacteria.Salinisphaerales.Salinisphaeraceae                                      | 0           |      |             |
| Bacteria.Proteobacteria.Gammaproteobacteria.Salinisphaerales.Salinisphaeraceae.Salinisphaera                        | 0           |      |             |
| Bacteria.Proteobacteria.Gammaproteobacteria.unclassified_order                                                      | 0           |      |             |
| Bacteria.Proteobacteria.Gammaproteobacteria.unclassified_order.unclassified_family                                  | 0           |      |             |
| Bacteria.Proteobacteria.Gammaproteobacteria.unclassified_order.unclassified_family.unclassified_genus               | 0           |      |             |
| Bacteria.Proteobacteria.Gammaproteobacteria.Vibrionales                                                             | 0           |      |             |
| Bacteria.Proteobacteria.Gammaproteobacteria.Vibrionales.Vibrionaceae                                                | 0           |      |             |
| Bacteria.Proteobacteria.Gammaproteobacteria.Vibrionales.Vibrionaceae.Photobacterium                                 | 0           |      |             |
| Bacteria.Proteobacteria.Gammaproteobacteria.Vibrionales.Vibrionaceae.unclassified_genus                             | 0           |      |             |
| Bacteria.Proteobacteria.Gammaproteobacteria.Vibrionales.Vibrionaceae.Vibrio                                         | 0           |      |             |
| Bacteria.Proteobacteria.Gammaproteobacteria.Xanthomonadales                                                         | 0           |      |             |
| Bacteria.Proteobacteria.Gammaproteobacteria.Xanthomonadales.Sinobacteraceae                                         | 0           |      |             |
| Bacteria.Proteobacteria.Gammaproteobacteria.Xanthomonadales.Sinobacteraceae.Steroidobacter                          | 0           |      |             |
| Bacteria.Proteobacteria.Gammaproteobacteria.Xanthomonadales.Xanthomonadaceae                                        | 0           |      |             |
| Bacteria.Proteobacteria.Gammaproteobacteria.Xanthomonadales.Xanthomonadaceae.Lysobacter                             | 0           |      |             |
| Bacteria.Proteobacteria.Gammaproteobacteria.Xanthomonadales.Xanthomonadaceae.Pseudoxanthomonas                      | 0           |      |             |
| Bacteria.Proteobacteria.Gammaproteobacteria.Xanthomonadales.Xanthomonadaceae.Stenotrophomonas                       | 0           |      |             |
| Bacteria.Proteobacteria.Gammaproteobacteria.Xanthomonadales.Xanthomonadaceae.unclassified_genus                     | 0           |      |             |
| Bacteria.Proteobacteria.Gammaproteobacteria.Xanthomonadales.Xanthomonadaceae.Wohlfahrtiimonas                       | 0           |      |             |
| Bacteria.Proteobacteria.Gammaproteobacteria.Xanthomonadales.Xanthomonadaceae.Xanthomonas                            | 0           |      |             |
| Bacteria.Proteobacteria.unclassified_class                                                                          | 0           |      |             |
| Bacteria.Proteobacteria.unclassified_class.unclassified_order                                                       | 0           |      |             |
| Bacteria.Proteobacteria.unclassified_class.unclassified_order.unclassified_family                                   | 0           |      |             |
| Bacteria.Proteobacteria.unclassified_class.unclassified_order.unclassified_family.unclassified_genus                | 0           |      |             |
| Bacteria.Spirochaetes                                                                                               | 0           |      |             |
| Bacteria.Spirochaetes.Spirochaetes                                                                                  | 0           |      |             |
| Bacteria.Spirochaetes.Spirochaetes.Spirochaetales                                                                   | 0           |      |             |
| Bacteria.Spirochaetes.Spirochaetes.Spirochaetales.Spirochaetaceae                                                   | 0           |      |             |
| Bacteria.Spirochaetes.Spirochaetes.Spirochaetales.Spirochaetaceae.Treponema                                         | 0           |      |             |
| Bacteria.SR1                                                                                                        | 0           |      |             |
| Bacteria.SR1.SR1_genera_incertae_sedis                                                                              | 0           |      |             |
| Bacteria.SR1.SR1_genera_incertae_sedis.unclassified_order                                                           | 0           |      |             |
| Bacteria.SR1.SR1_genera_incertae_sedis.unclassified_order.unclassified_family                                       | 0           |      |             |
| Bacteria.SR1.SR1_genera_incertae_sedis.unclassified_order.unclassified_family.unclassified_genus                    | 0           |      |             |
| Bacteria.Synergistetes                                                                                              | 0           |      |             |
| Bacteria.Synergistetes.Synergistia                                                                                  | 0           |      |             |
| Bacteria.Synergistetes.Synergistia.Synergistales                                                                    | 0           |      |             |
| Bacteria.Synergistetes.Synergistia.Synergistales.Synergistaceae                                                     | 0           |      |             |
| Bacteria.Synergistetes.Synergistia.Synergistales.Synergistaceae.unclassified_genus                                  | 0           |      |             |
| Bacteria.Tenericutes                                                                                                | 0           |      |             |
| Bacteria.Tenericutes.Mollicutes                                                                                     | 0           |      |             |
| Bacteria.Tenericutes.Mollicutes.Anaeroplasmatales                                                                   | 0           |      |             |
| Bacteria.Tenericutes.Mollicutes.Anaeroplasmatales.Anaeroplasmataceae                                                | 0           |      |             |
| Bacteria.Tenericutes.Mollicutes.Anaeroplasmatales.Anaeroplasmataceae.Anaeroplasma                                   | 0           |      |             |
| Bacteria.Tenericutes.Mollicutes.Mycoplasmatales                                                                     | 0           |      |             |
| Bacteria.Tenericutes.Mollicutes.Mycoplasmatales.Mycoplasmataceae                                                    | 0           |      |             |
| Bacteria.Tenericutes.Mollicutes.Mycoplasmatales.Mycoplasmataceae.Mycoplasma                                         | 0           |      |             |
| Bacteria.TM7                                                                                                        | 0           |      |             |
| Bacteria.TM7.TM7_genera_incertae_sedis                                                                              | 0           |      |             |
| Bacteria.TM7.TM7_genera_incertae_sedis.unclassified_order                                                           | 0           |      |             |
| Bacteria.TM7.TM7_genera_incertae_sedis.unclassified_order.unclassified_family                                       | 0           |      |             |
| Bacteria.TM7.TM7_genera_incertae_sedis.unclassified_order.unclassified_family.unclassified_genus                    | 0           |      |             |
| Bacteria.unclassified_phylum                                                                                        | 4.369765597 | GB-H | 3.831087035 |
| Bacteria.unclassified_phylum.unclassified_class                                                                     | 4.369765597 | GB-H | 3.831087035 |
| Bacteria.unclassified_phylum.unclassified_class.unclassified_order                                                  | 4.369765597 | GB-H | 3.831087035 |
| Bacteria.unclassified_phylum.unclassified_class.unclassified_order.unclassified_family                              | 4.369765597 | GB-H | 3.831087035 |
| Bacteria.unclassified_phylum.unclassified_class.unclassified_order.unclassified_family.unclassified_genus           | 4.369765597 | GB-H | 3.831087035 |
| Bacteria.Verrucomicrobia                                                                                            | 0           |      |             |
| Bacteria.Verrucomicrobia.Opitutae                                                                                   | 0           |      |             |
| Bacteria.Verrucomicrobia.Opitutae.Opitutales                                                                        | 0           |      |             |
| Bacteria.Verrucomicrobia.Opitutae.Opitutales.Opitutaceae                                                            | 0           |      |             |
| Bacteria.Verrucomicrobia.Opitutae.Opitutales.Opitutaceae.Opitutus                                                   | 0           |      |             |
| Bacteria.Verrucomicrobia.Spartobacteria                                                                             | 0           |      |             |
| Bacteria.Verrucomicrobia.Spartobacteria.Spartobacteria_genera_incertae_sedis                                        | 0           |      |             |
| Bacteria.Verrucomicrobia.Spartobacteria.Spartobacteria_genera_incertae_sedis.unclassified_family                    | 0           |      |             |
| Bacteria.Verrucomicrobia.Spartobacteria.Spartobacteria_genera_incertae_sedis.unclassified_family.unclassified_genus | 0           |      |             |
| Bacteria.Verrucomicrobia.unclassified_class                                                                         | 0           |      |             |
| Bacteria.Verrucomicrobia.unclassified_class.unclassified_order                                                      | 0           |      |             |
| Bacteria.Verrucomicrobia.unclassified_class.unclassified_order.unclassified_family                                  | 0           |      |             |
| Bacteria.Verrucomicrobia.unclassified_class.unclassified_order.unclassified_family.unclassified_genus               | 0           |      |             |
| Bacteria.Verrucomicrobia.Verrucomicrobiae                                                                           | 0           |      |             |
| Bacteria.Verrucomicrobia.Verrucomicrobiae.Verrucomicrobiales                                                        | 0           |      |             |
| Bacteria.Verrucomicrobia.Verrucomicrobiae.Verrucomicrobiales.Verrucomicrobiaceae                                    | 0           |      |             |
| Bacteria.Verrucomicrobia.Verrucomicrobiae.Verrucomicrobiales.Verrucomicrobiaceae.Akkermansia                        | 0           |      |             |

Footnotes:

1. Taxonomic assignment determined using RDP classifier to compare a representative sequence from each OTU to reference sequences in the greengenes database.

**Table S20. Average intestinal inflammation scores in each treatment group**

| Experimental group           | Score       |
|------------------------------|-------------|
| Fishmeal-based, high density | 1.53 ± 0.17 |
| Fishmeal-based, low density  | 1.93 ± 0.21 |
| Grain-based, high density    | 1.73 ± 0.18 |
| Grain-based, low density     | 1.6 ± 0.19  |

**Table S21. End-of-study results for measured fish fillet contaminant concentrations in each diet treatment group**

| Contaminant                          | Fishmeal Diet       | Grain-based Diet    |
|--------------------------------------|---------------------|---------------------|
| DDE ( $\mu\text{g/g}$ ) <sup>1</sup> | 0.0059 $\pm$ 0.0006 | 0.0064 $\pm$ 0.0012 |
| Total PCBs (ppm) <sup>2</sup>        | 0.0069 $\pm$ 0.0009 | 0.0048 $\pm$ 0.0015 |

Footnotes:

1. DDE = dichlorodiphenyldichloroethylene

2. PCBs = polychlorinated biphenyls (209 congeners tested).

%OTUs from each class

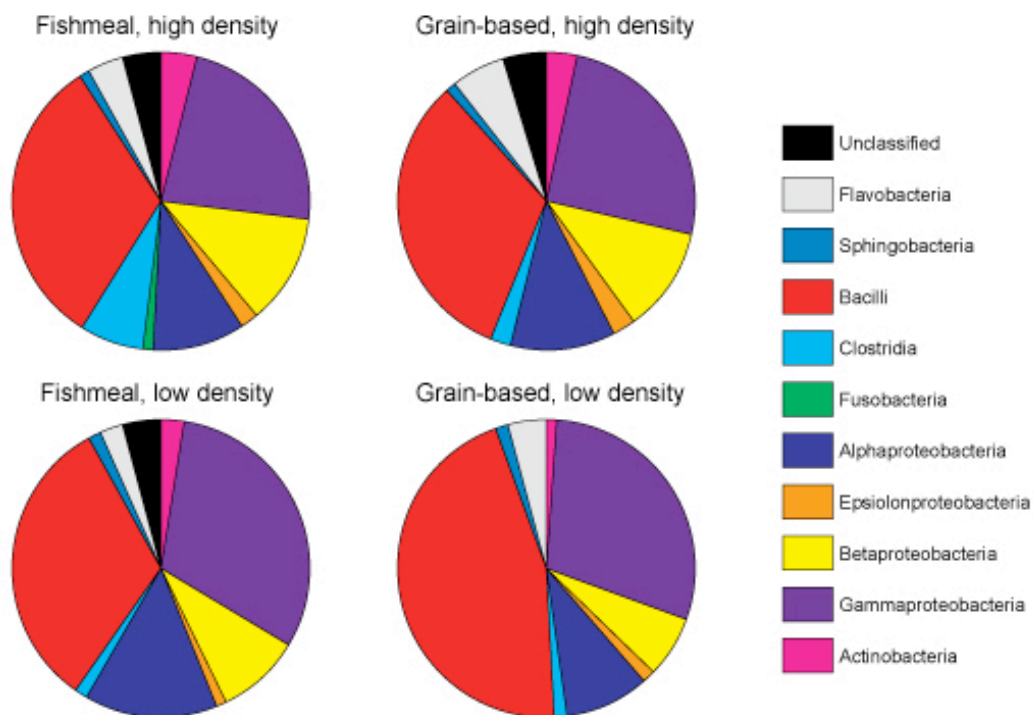

**Figure S1. Diversity of rainbow trout treatment core microbiotas.** Percentage of the treatment core OTUs from each bacterial class.

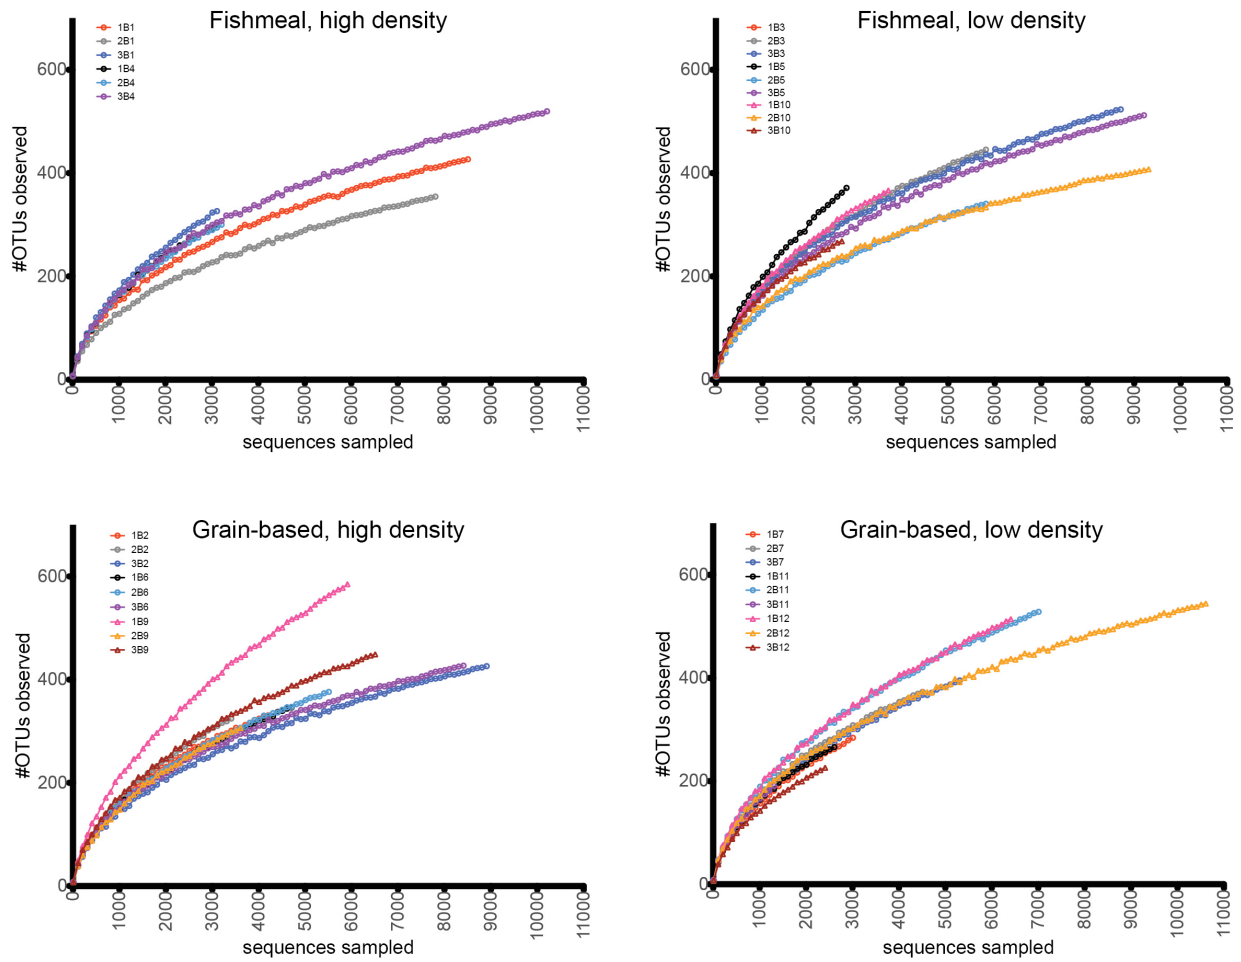

**Figure S2. Alpha rarefaction of 16S sequences from rainbow trout intestines.** The number of unique observed 16S sequences for each sequenced fish at sampling depths from 10-11000 sequences. Each curve in each panel represents a single animal. Curves are truncated when all sequences in an individual have been sampled.



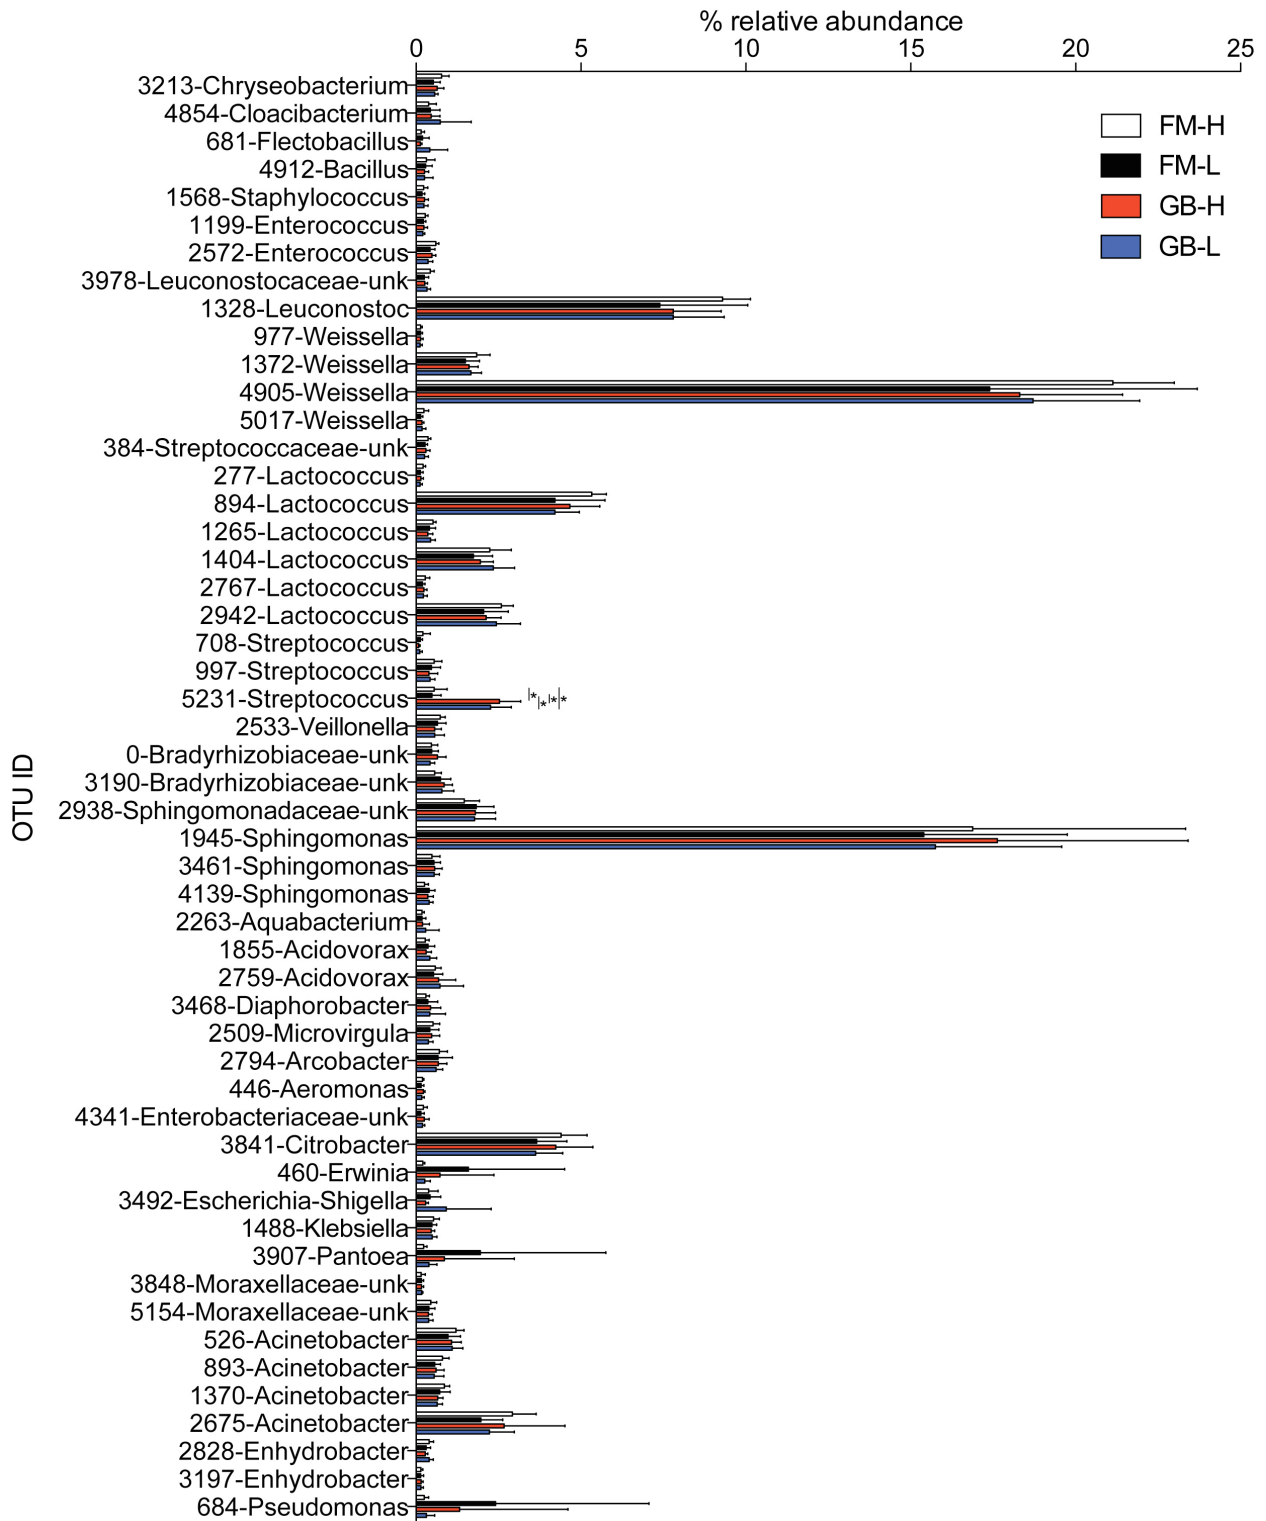

**Figure S3. Average relative abundances of 52 shared core OTUs in each treatment.** “OTU ID” indicates an arbitrarily assigned OTU number followed by the most detailed taxonomic classification for the OTU. For statistical comparison between treatment groups, OTU counts were standardized by sample and normalized by  $\log_{10}$  transformation. Relative abundances between treatment groups were compared by Student’s t-test with a 5% FDR. Asterisks indicate statistically significant differences between treatment groups.
